# Supplementary material for: Visible light-driven highly atom-economical divergent synthesis of substituted fluorenols and cyclopropylcarbaldehydes
Source: Royal Society of Chemistry journal article supplement (doi:10.1039/d3gc03592a), 2023-11-24

## Supporting Information

### For

#### **Visible Light-driven highly atom-economic divergent synthesis of substituted fluorenols and cyclopropylcarbaldehydes**

Babasaheb S. Gore,<sup>a</sup> Lin-Wei Pan,<sup>a†</sup> Jun-Hao Lin,<sup>a†</sup> Yi-Chi Luo,<sup>a</sup> and Jeh-Jeng Wang<sup>\*a,b</sup>

<sup>a</sup> Department of Medicinal and Applied Chemistry, Kaohsiung Medical University, No. 100, Shiquan 1st Rd, Sanmin District, Kaohsiung City, 807, Taiwan.

<sup>b</sup> Department of Medical Research, Kaohsiung Medical University Hospital, No. 100, Tzyou 1st Rd, Sanmin District, Kaohsiung City, 807, Taiwan.

<sup>†</sup>These two authors contributed equally.

E-mail: [jjwang@kmu.edu.tw](mailto:jjwang@kmu.edu.tw)

# Table of Contents

|                                                  |           |
|--------------------------------------------------|-----------|
| 1. General Information                           | S3        |
| 2. Experimental Procedures                       | S4-S6     |
| 3. Synthetic Applications                        | S6        |
| 4. Control Studies                               | S7        |
| 5. Light On-Off Experiment                       | S8        |
| 6. Table S1. Optimization of Reaction Conditions | S9        |
| 7. Evaluation of Green Metrics of the Process    | S10-S11   |
| 8. Spectral Characterization                     | S12-S21   |
| 9. Copies of $^1\text{H}$ , and $^{13}\text{C}$  | S22-S99   |
| 10. X-ray crystal data                           | S100-S111 |

## 1. General Information

$^1\text{H}$ ,  $^{13}\text{C}$ , and DEPT NMR spectra were recorded on a 400 MHz Varian Unity Plus or Varian Mercury plus spectrometer or JEOL ECS-400. The chemical shift ( $\delta$ ) values are reported in parts per million (ppm), and the coupling constants ( $J$ ) are given in Hz. The spectra were recorded using  $\text{CDCl}_3$  as a solvent.  $^1\text{H}$  NMR chemical shifts are referenced to tetramethylsilane (TMS) (0 ppm) and 5.3 ppm belongs to  $\text{CH}_2\text{Cl}_2$ .  $^{13}\text{C}$  NMR was referenced to  $\text{CDCl}_3$  (77.0 ppm). The abbreviations used are as follows: s, singlet; d, doublet; t, triplet; q, quartet; dd, doublet of doublet; ddd, doublet of doublet of doublet; dt, doublet of triplets; td, triplet of doublet; m, multiplet. Mass spectra and High-Resolution Mass spectral (HRMS) data was carried out using an Agilent6890N GC (JEOL JMS-700) TOF instrument, and the ion source is electrospray ionization (ESI), electronic ionization (EI), CI, and FAB as ion source at National Taiwan Normal University, Taipei City, Taiwan and ESI-TOF(FT-MS solariX) at National Sun Yat-Sen University, Kaohsiung, Taiwan, and LTQ Orbitrap XL (Thermo Fischer Scientific) at National Chung Hsing University. Liquid-chromatography mass spectra (LCMS) were measured using the LC-MS/MS-8045 (Shimadzu Corporation, Japan) at Kaohsiung Medical University, Kaohsiung, Taiwan. Melting points were determined on an EZ-Melt (Automated melting point apparatus). Irradiation of photochemical reactions was carried out using 1 x 40 W Kessil Blue LED lamps purchased from Amazon with an output centred at a wavelength of approximately 462 nm. All products reported showed  $^1\text{H}$  NMR spectra in agreement with the assigned structures. Reaction progress and product mixtures were routinely monitored by TLC using Merck TLC aluminium sheets (silica gel 60 F254). Column chromatography was carried out with 230–400 mesh silica gel 60 (Merck) and a mixture of hexane/ethyl acetate or hexane as eluent.

## 2. Experimental Procedure

### a) General Procedure for the Synthesis of (*E*) (ethyl)-2-aryl-3-(2-(arylkynyl)aryl)acrylonitrile/carboxylate analogous (**1** & **3**).

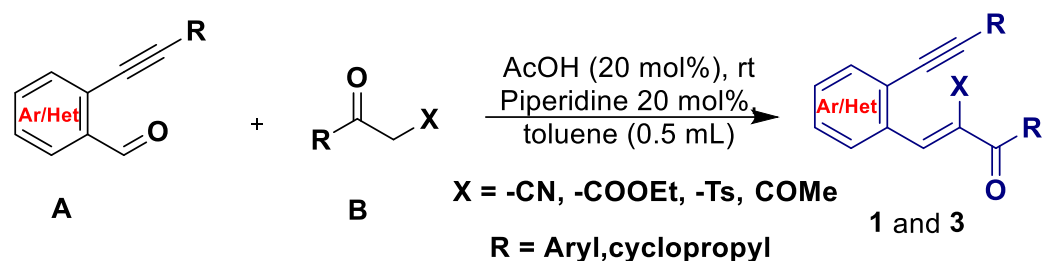

A reaction tube was charged with 2-(phenylalkynyl)benzaldehyde (**A**) (1.0 equiv), 3-oxo-3-arylacetonitriles/ester/ketone and derivatives (**B**) (1.2 equiv), acetic acid (20 mol%) and pyrrolidine (20 mol%) in 0.5 mL of toluene. The reaction suspension was stirred at room temperature, and the progress of the reaction was monitored by TLC. Upon completion, water was added to quench the reaction mixture, which was then extracted with ethyl acetate (3×20 mL). Finally, the combined organic layer was dried over sodium sulfate, filtered, and concentrated under vacuum. The residue was purified by column chromatography on silica gel to afford the corresponding (*E*)-2-aryl-3-(2-(phenylalkynyl)phenyl)aroylacetonitriles/ester/ketone derivatives **1** and **3**.

### b) General procedure for the synthesis of 11-hydroxy-11-aryl-11*H*-benzo[*a*]fluorene (**2**) derivatives.

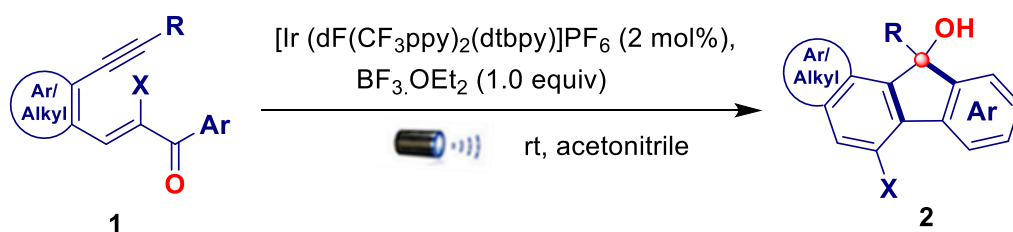

A clean vial (5 mL) equipped with a magnetic stir bar was added to **1** (0.2 mmol), and [Ir(dF(CF<sub>3</sub>)ppy)<sub>2</sub>(dtbpy)]PF<sub>6</sub>. Next, acetonitrile (2.0 mL) was added after which, stirred at room temperature, and then placed at a distance of approx. 3 cm from a 24 W blue LED, and the solution was stirred at room

temperature under visible-light irradiation for 24 h. The progress of the reaction was monitored by thin layer chromatography. When the reaction was complete, water was added to quench the reaction mixture, followed by extraction with ethyl acetate (3×15 mL). Finally, the combined organic layer was dried over sodium sulfate, filtered, and concentrated under vacuum. The residue was purified by column chromatography (Hex/EA = 97/3) on silica gel to afford the corresponding 11-hydroxy-11-aryl-11*H*-benzo[*a*]fluorene (**2**) derivatives.

**b) General procedure for the synthesis of 4-(1-formylcyclopropyl)-3-aryl-2-naphthylene (**4**) derivatives.**

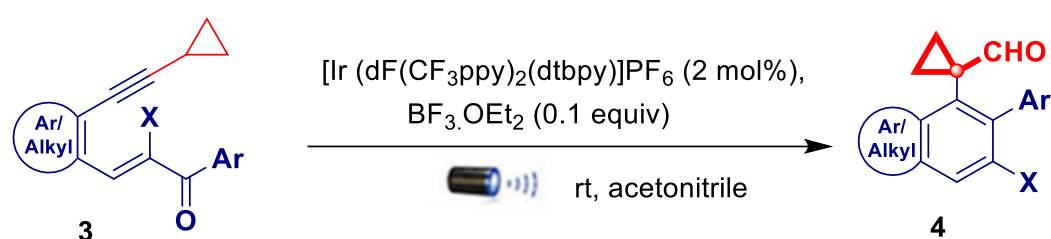

A clean vial (5 mL) equipped with a magnetic stir bar was added to **3** (0.2 mmol), and (Ir[dF(CF<sub>3</sub>)ppy]<sub>2</sub>(dtbbpy))PF<sub>6</sub>. Next, acetonitrile (2.0 mL) was added after which, stirred at room temperature, and then placed at a distance of approx. 3 cm from a 24 W blue LED, and the solution was stirred at room temperature under visible-light irradiation for 3-7 h. The progress of the reaction was monitored by thin layer chromatography. When the reaction was complete, water was added to quench the reaction mixture, followed by extraction with ethyl acetate (3×15 mL). Finally, the combined organic layer was dried over sodium sulfate, filtered, and concentrated under vacuum. The residue was purified by column chromatography (Hex/EA = 95/5) on silica gel to afford the corresponding 4-(1-formylcyclopropyl)-3-aryl-2-naphthylene (**4**) derivatives.

**c) General procedure for gram scale synthesis**

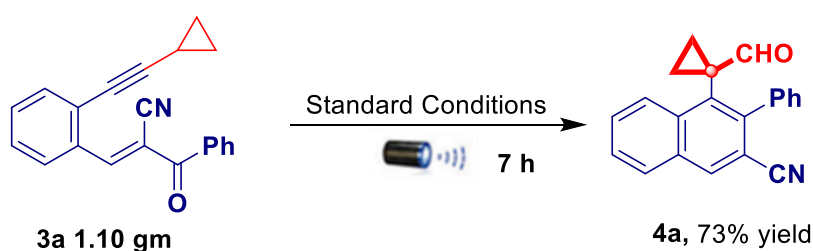

A clean vial (5 mL) equipped with a magnetic stir bar was added to **3** (3.74 mmol), and  $(\text{Ir}[\text{dF}(\text{CF}_3)\text{ppy}]_2(\text{dtbpy}))\text{PF}_6$ . Next, acetonitrile (30.0 mL) was added after which, stirred at room temperature, and then placed at a distance of approx. 3 cm from a 24 W blue LED, and the solution was stirred at room temperature under visible-light irradiation for 7 h. The progress of the reaction was monitored by thin layer chromatography. When the reaction was complete, water was added to quench the reaction mixture, followed by extraction with ethyl acetate ( $3 \times 15$  mL). Finally, the combined organic layer was dried over sodium sulfate, filtered, and concentrated under vacuum. The residue was purified by column chromatography (Hex/EA = 97/3) on silica gel to afford the corresponding 4-(1-formylcyclopropyl)-3-aryl-2-naphthylene (**4a**) derivatives.

### 3. Synthetic Applications (Scheme S1)

#### a) Chlorination

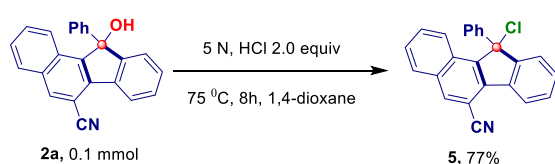

#### b) Methylation

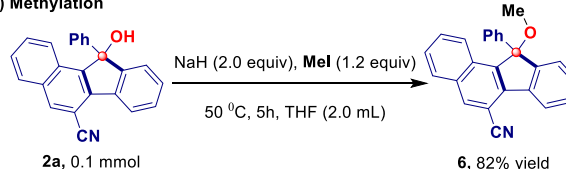

#### c) Reduction of aldehyde

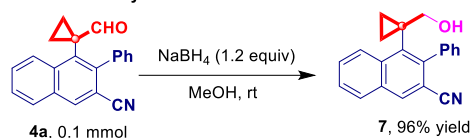

#### d) Regioselective ring opening of cyclopropane

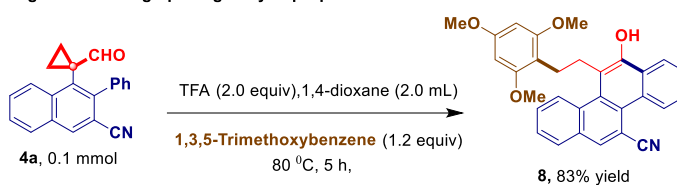

#### e) Esterification

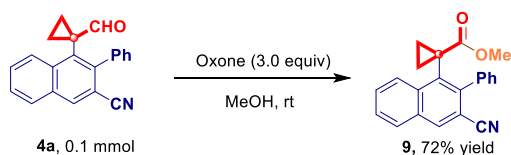

## 4. Control Studies (Scheme S2)

### a) Radical control experiment

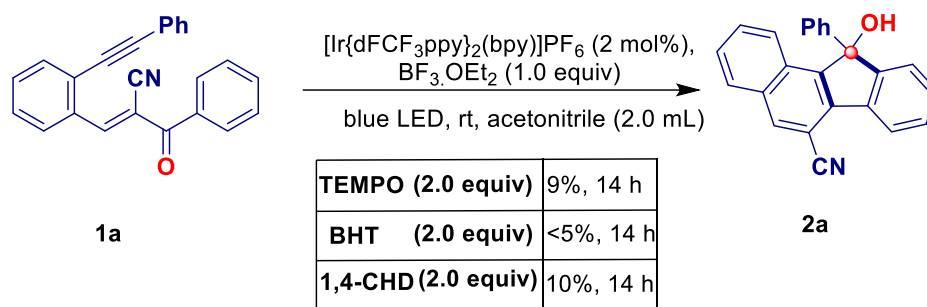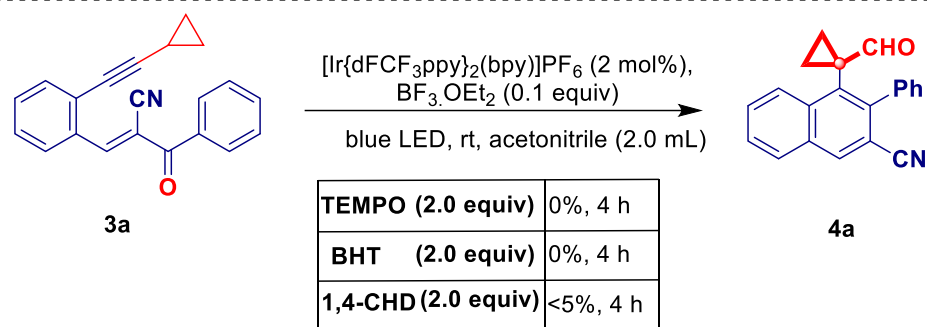

### b) Control studies of temperature, light and catalyst

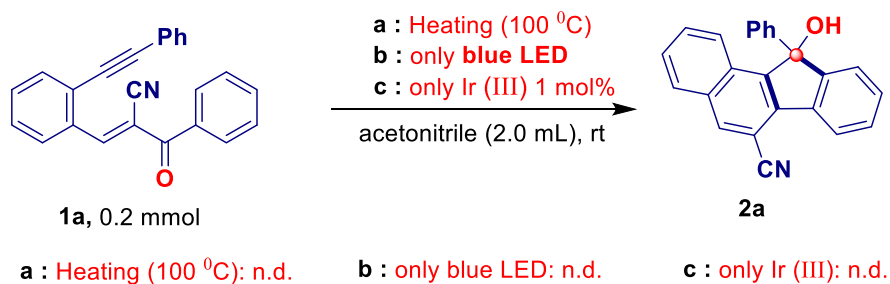

## 5. Light On-Off Experiment (Scheme S3)

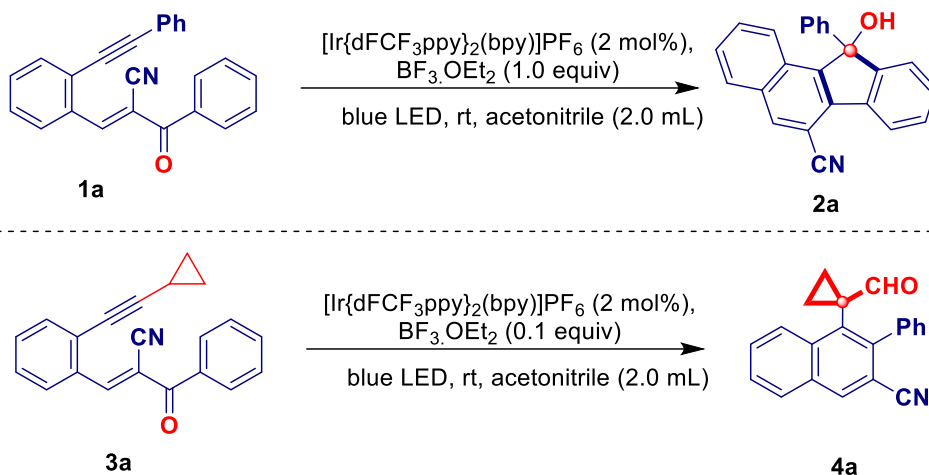

A light on/off experiment was performed by using the model reaction of **1a** with **3a** irradiated under the standard catalytic system. The reaction proceeded over a period of time under alternating cycles of irradiation and darkness (1-16 h and 30-180 min.), and the progress was monitored by TLC analysis. As shown in Figure S1, cyclization products **2a** and **4a** was only formed under irradiation with blue LED (Scheme S3).

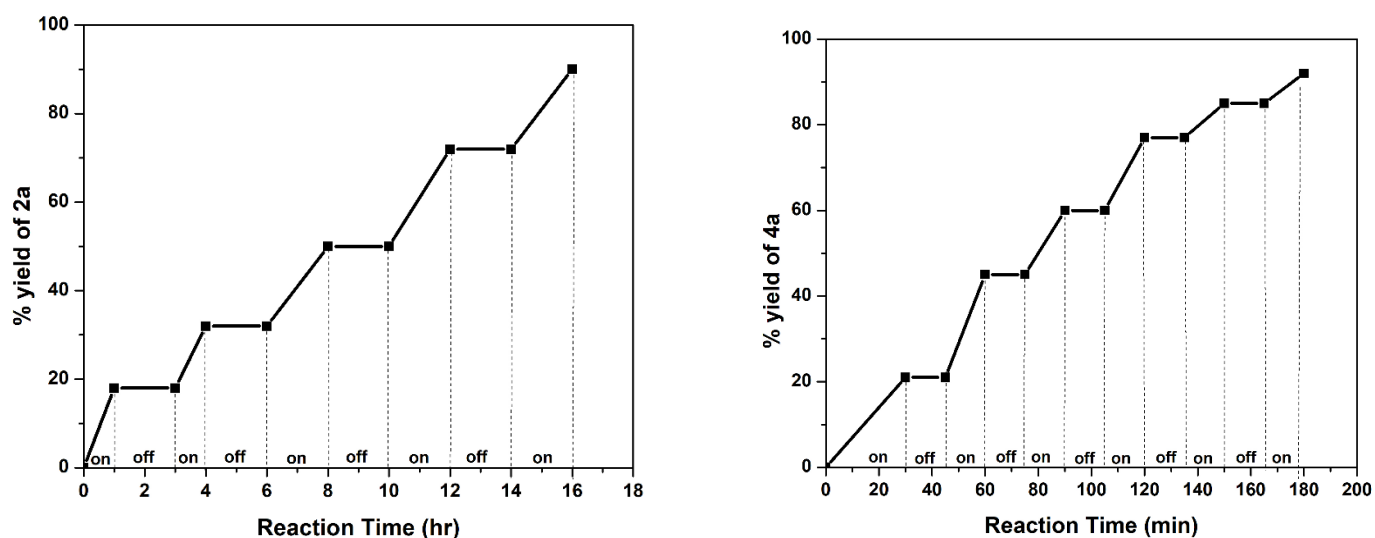

Figure S1. Visible-light Irradiation ON/OFF Experiments



6. Table S1. Optimization of Reaction Conditions<sup>a</sup>

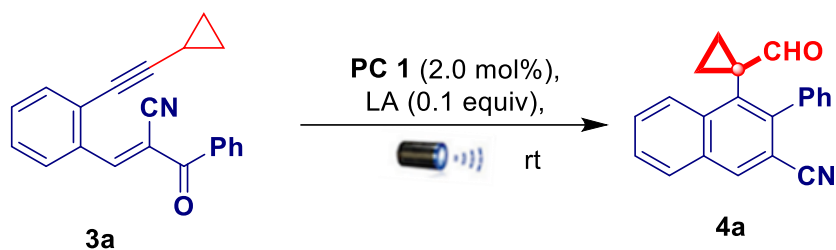

| Entry | Catalyst<br>(X mol %)              | Deviation from Standard<br>Conditions (Y equiv) | Solvent      | Yield (%) <sup>b</sup> |
|-------|------------------------------------|-------------------------------------------------|--------------|------------------------|
| 1     | None                               | none                                            | acetonitrile | 90                     |
| 2     | <b>PC 1</b> (2)                    | BF <sub>3</sub> .OEt <sub>2</sub> (1.0)         | acetonitrile | 21                     |
| 3     | <b>PC 1</b> (2)                    | BF <sub>3</sub> .OEt <sub>2</sub> (0.5)         | acetonitrile | 50                     |
| 4     | <b>PC 1</b> (2)                    | BF <sub>3</sub> .OEt <sub>2</sub> (0.2)         | acetonitrile | 82                     |
| 5     | <b>PC 2</b> instead of <b>PC 1</b> | BF <sub>3</sub> .OEt <sub>2</sub> (0.1)         | acetonitrile | 41                     |
| 6     | <b>PC 3</b> instead of <b>PC 1</b> | BF <sub>3</sub> .OEt <sub>2</sub> (0.1)         | acetonitrile | 50                     |
| 7     | <b>PC 1</b> (2)                    | -                                               | acetonitrile | 0                      |
| 8     | -                                  | BF <sub>3</sub> .OEt <sub>2</sub> (0.1)         | acetonitrile | 0                      |

<sup>a</sup> Reaction conditions: **3a** (0.2 mmol), **PC 1** = [Ir{dFCF<sub>3</sub>ppy}<sub>2</sub>(bpy)]PF<sub>6</sub> = Ir (III), acetonitrile (2.0 mL), 3 h stirred under blue LED at room temperature. <sup>b</sup> Isolated yields by silica gel column. **PC 2** = [Ru(bpy)<sub>3</sub>](PF<sub>6</sub>)<sub>2</sub>, **PC 3** = TBADT.

## 7. Evaluation of Green Metrics of the Process.

Atom economy defined as “how much of the reactants remain in the final desired product”

$$\text{Atom economy (AE)} = \frac{\text{Molecular mass of desired product}}{\text{Molecular mass of all reactants}} \times 100$$

Reaction mass efficiency (RME) defined as “the percentage of the mass of the reactants that remain in the product”

$$\text{Reaction mass efficiency (RME)} = \frac{\text{mass of desired product}}{\text{mass of all reactants}} \times 100$$

### Evaluation of Green metrics for the current process

#### Reaction Scheme

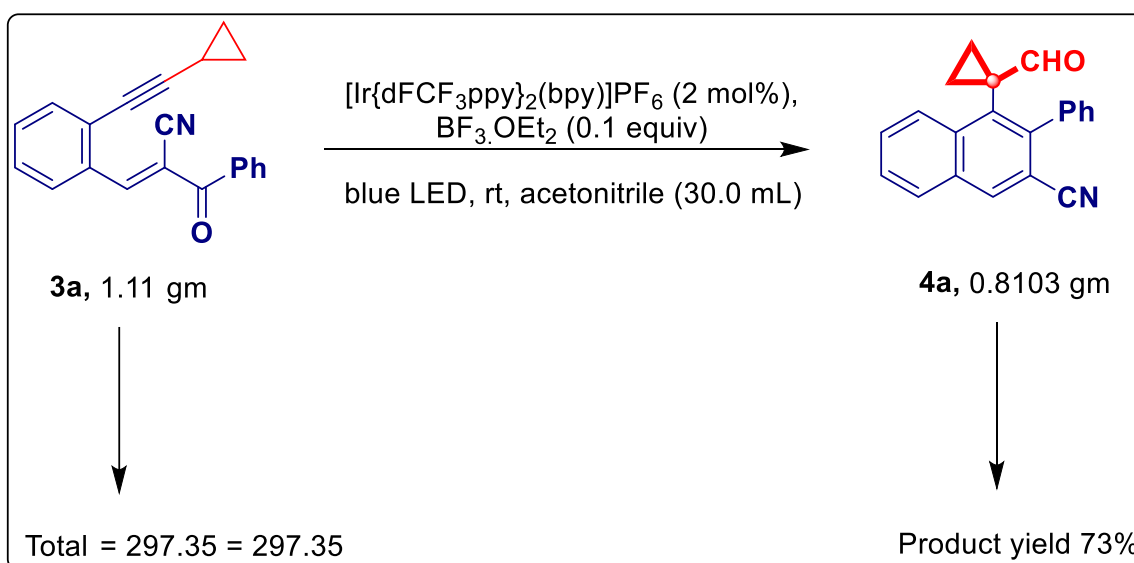

|            |                                                                           |           |                |           |
|------------|---------------------------------------------------------------------------|-----------|----------------|-----------|
| Reactant 1 | (E)-2-benzoyl-3-(2-(cyclopropylethynyl)phenyl)acrylonitrile ( <b>3a</b> ) | 1.11 gm   | 0.003733 mol   | FW 297.35 |
| Auxiliary  | Ir(III)                                                                   | 0.0431 gm | 0.00003736 mol | 1155      |
| Product    | 4-(1-formylcyclopropyl)-3-phenyl-2-naphthonitrile ( <b>4a</b> )           | 0.8103 gm | 0.002725 mol   | FW 297.35 |

|                          |   |                                                                          |                                   |
|--------------------------|---|--------------------------------------------------------------------------|-----------------------------------|
| E-factor                 | = | $\frac{1.11 \text{ gm} + 0.0431 \text{ gm} - 0.8103 \text{ gm}}{0.8103}$ | = 0.42305 kg waste / 1 kg product |
| Atom economy             | = | $\frac{297.35}{297.35} \times 100$                                       | = 100%                            |
| Atom efficiency          | = | $\frac{73 \times 100}{100}$                                              | = 73%                             |
| Carbon efficiency        | = | $\frac{21}{21}$                                                          | = 100%                            |
| Reaction mass efficiency | = | $\frac{0.8103 \text{ gm}}{1.11 \text{ gm}} \times 100$                   | = 73%                             |

## 8. Spectral Characterization

**11-hydroxy-11-phenyl-11H-benzo[*a*]fluorene-6-carbonitrile (2a):** White solid, (53.95 mg, 81%), m.p. 247-

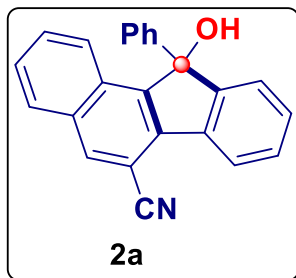

249 °C; <sup>1</sup>H NMR (400 MHz, CDCl<sub>3</sub>) δ 8.37 (d, *J* = 7.7 Hz, 1H), 8.31 (s, 1H), 7.96 – 7.86 (m, 2H), 7.49 (ddd, *J* = 6.7, 5.1, 3.4 Hz, 2H), 7.46 – 7.41 (m, 1H), 7.39 – 7.34 (m, 3H), 7.33 – 7.19 (m, 5H), 2.58 (s, 1H); <sup>13</sup>C NMR (101 MHz, CDCl<sub>3</sub>) δ 151.96, 146.26, 141.76, 137.10, 136.75, 132.66, 130.79, 129.70, 129.52, 129.34, 129.18, 128.56, 127.44, 127.13, 125.17, 124.85, 124.25, 122.01, 118.31, 102.94, 83.67; HRMS (ESI) *m/z*: [M-H]<sup>-</sup> Calcd for: C<sub>24</sub>H<sub>14</sub>NO 332.1075; found 332.1078.

**11-hydroxy-11-phenyl-11H-indeno[2',1':5,6]naphtho[2,3-*d*][1,3]dioxole-6-carbonitrile (2b):** White solid

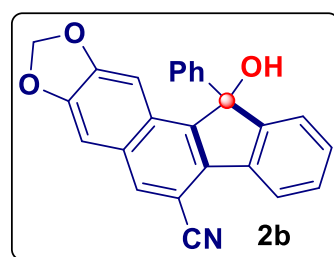

(50.52 mg, 67%), m.p. 260-262 °C; <sup>1</sup>H NMR (400 MHz, CDCl<sub>3</sub>, TMS) : δ 8.33 (dt, *J* = 7.7, 0.9 Hz, 1H), 8.05 (s, 1H), 7.41 (ddd, *J* = 7.7, 7.2, 1.5 Hz, 1H), 7.38 – 7.33 (m, 2H), 7.33 – 7.29 (m, 1H), 7.29 – 7.18 (m, 6H), 6.01 (dd, *J* = 16.1, 1.0 Hz, 2H); <sup>13</sup>C NMR (101 MHz, CDCl<sub>3</sub>, TMS): δ 151.61, 150.39, 148.62, 145.18, 141.66, 136.82, 135.43, 134.83, 130.26, 129.48, 129.11, 129.07, 128.59, 128.42, 127.42, 124.85, 124.15, 121.85, 118.58, 104.69, 101.71, 101.48, 100.97, 83.66;

HRMS (ESI) *m/z*: [M+H]<sup>+</sup> C<sub>25</sub>H<sub>16</sub>NO<sub>3</sub> Calcd for: 378.1130; found 378.1127.

**11-hydroxy-2-methyl-11-phenyl-11H-benzo[*a*]fluorene-6-carbonitrile (2c):** White solid, (52.05 mg, 75%) mp 262-264 °C; <sup>1</sup>H NMR (400 MHz, CDCl<sub>3</sub>, TMS) : δ 8.34 (d, *J* = 7.7 Hz, 1H),

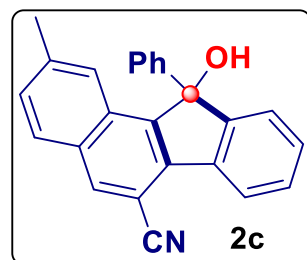

8.23 (s, 1H), 7.79 (d, *J* = 8.4 Hz, 1H), 7.66 (s, 1H), 7.47 – 7.15 (m, 9H), 2.60 (s, 1H), 2.37 (s, 3H); <sup>13</sup>C NMR (100 MHz, CDCl<sub>3</sub>, TMS) : δ 152.01, 145.32, 141.78, 140.18, 136.79, 136.24, 131.01, 130.97, 129.52, 129.42, 129.20, 128.97, 128.51, 127.35, 124.82, 124.16, 123.97, 121.93, 118.53, 101.83, 83.66, 22.29; HRMS (ESI) *m/z*: [M+H]<sup>+</sup> Calcd for: C<sub>25</sub>H<sub>18</sub>NO 348.1388; found 348.1385.

**3-fluoro-11-hydroxy-11-phenyl-11H-benzo[*a*]fluorene-6-carbonitrile (2d):** White solid, (48.43mg, 69%) mp 256-258 °C. <sup>1</sup>H NMR (597 MHz, CDCl<sub>3</sub>) δ 8.38 – 8.29 (m, 2H), 7.94 – 7.87

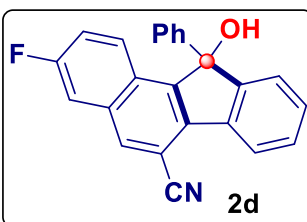

(m, 2H), 7.53 – 7.46 (m, 2H), 7.40 – 7.33 (m, 2H), 7.31 – 7.26 (m, 2H), 7.26 – 7.23 (m, 1H), 7.15 – 7.10 (m, 1H), 7.06 (dd, *J* = 8.0, 2.5 Hz, 1H), 2.56 (s, 1H). <sup>13</sup>C NMR (101 MHz, CDCl<sub>3</sub>, TMS) δ 164.48, 162.81 (d, *J*<sub>C-F</sub> = 250.5 Hz), 141.12, 137.18, 135.54, 132.43, 130.78, 129.86, 129.23, 128.72 (d, *J*<sub>C-F</sub> = 94.5 Hz), 127.74, 127.18, 124.98, 124.78, 123.43, 123.37 (d, *J*<sub>C-F</sub> = 9.0 Hz), 118.19, 116.50, 116.35

(d, *J*<sub>C-F</sub> = 22.5 Hz), 112.28, 112.12 (d, *J*<sub>C-F</sub> = 24.0 Hz), 102.70; HRMS (ESI) *m/z*: [M-H]<sup>-</sup> C<sub>24</sub>H<sub>13</sub>FNO Calcd for: 350.0981 found 350.0987.

**3-chloro-11-hydroxy-11-phenyl-11H-benzo[a]fluorene-6-carbonitrile (2e):** White solid (49.51mg, 68%)

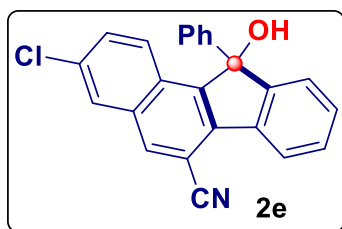

mp 259-260 °C  $^1\text{H NMR}$  (597 MHz,  $\text{CDCl}_3$ )  $\delta$  8.39 (dt,  $J = 7.7, 0.8$  Hz, 1H), 8.23 (s, 1H), 7.89 (dd,  $J = 8.6, 5.6$  Hz, 2H), 7.47 – 7.44 (m, 1H), 7.41 (dd,  $J = 9.0, 2.1$  Hz, 1H), 7.38 – 7.33 (m, 3H), 7.28 – 7.26 (m, 3H), 7.26 – 7.21 (m, 2H).  $^{13}\text{C NMR}$  (150 MHz,  $\text{CDCl}_3$ )  $\delta$  151.80, 146.63, 141.47, 136.52, 136.47, 135.88, 133.30, 133.28, 130.60, 129.70, 129.62, 129.05, 128.66, 127.67, 127.62, 126.81, 124.80, 124.31, 122.13, 117.87, 104.24, 83.78; HRMS (ESI)  $m/z$ :  $[\text{M}+\text{H}]^+$   $\text{C}_{24}\text{H}_{15}\text{ClNO}$

Calcd for: 368.0842; found 368.0839.

**9-(tert-butyl)-11-hydroxy-11-phenyl-11H-benzo[a]fluorene-6-carbonitrile (2f):** White solid (65.35mg, 84%)

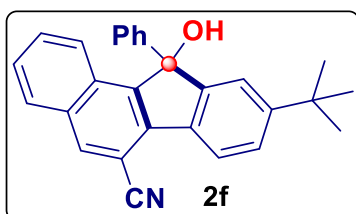

mp 268-269 °C;  $^1\text{H NMR}$  (400 MHz,  $\text{CDCl}_3$ )  $\delta$  8.35 – 8.24 (m, 2H), 7.95 – 7.85 (m, 2H), 7.50 – 7.43 (m, 3H), 7.38 (tt,  $J = 5.0, 2.1$  Hz, 3H), 7.29 – 7.20 (m, 4H), 2.54 (s, 1H), 1.29 (s, 9H);  $^{13}\text{C NMR}$  (101 MHz,  $\text{CDCl}_3$ )  $\delta$  153.11, 152.00, 146.28, 141.96, 136.90, 136.35, 134.16, 132.44, 130.82, 129.57, 129.17, 128.49, 127.30, 126.86, 126.63, 125.04, 124.92, 121.54, 121.08, 118.35, 102.78, 83.79, 35.11, 31.30; HRMS (ESI)  $m/z$ :  $[\text{M}+\text{H}]^+$   $\text{C}_{28}\text{H}_{24}\text{NO}$

Calcd for :390.1858; found 390.1856.

**11-hydroxy-9-methyl-11-phenyl-11H-benzo[a]fluorene-6-carbonitrile (2g):** White solid (55.52mg, 80%)

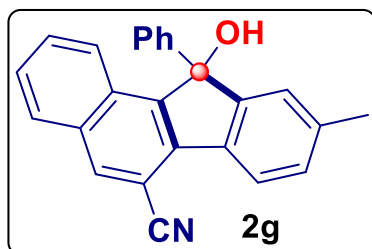

mp 227-227 °C;  $^1\text{H NMR}$  (400 MHz,  $\text{CDCl}_3$ )  $\delta$  8.28 (dd,  $J = 11.3, 3.6$  Hz, 2H), 8.13 – 8.06 (m, 1H), 7.90 – 7.82 (m, 1H), 7.49 – 7.35 (m, 5H), 7.26 – 7.17 (m, 3H), 7.07 (d,  $J = 7.6$  Hz, 1H), 2.45 (s, 1H), 2.18 (s, 3H);  $^{13}\text{C NMR}$  (100 MHz,  $\text{CDCl}_3$ , TMS)  $\delta$  148.98, 146.95, 140.28, 137.43, 137.16, 135.68, 135.55, 132.59, 131.63, 130.46, 129.78, 129.61, 129.14, 128.53, 128.13, 126.93, 125.63, 124.61, 119.42, 118.46, 102.85, 84.65, 17.51; HRMS (ESI)  $m/z$ :  $[\text{M}-\text{H}]^-$   $\text{C}_{25}\text{H}_{16}\text{NO}$  Calcd for: 346.1232; found 346.1241.

**11-hydroxy-8-methyl-11-phenyl-11H-benzo[a]fluorene-6-carbonitrile (2h):** White solid (53.43mg, 77%)

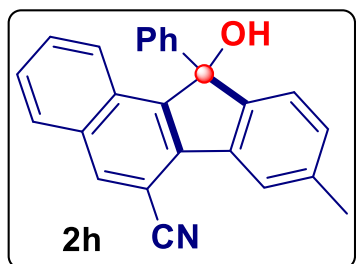

mp 248-250 °C;  $^1\text{H NMR}$  (400 MHz,  $\text{CDCl}_3$ )  $\delta$  8.38 (d,  $J = 7.6$  Hz, 1H), 8.27 (s, 1H), 7.81 (d,  $J = 8.5$  Hz, 1H), 7.67 (s, 1H), 7.43 (dd,  $J = 11.2, 3.8$  Hz, 1H), 7.40 – 7.31 (m, 4H), 7.29 – 7.22 (m, 4H), 2.53 (s, 1H), 2.38 (s, 3H);  $^{13}\text{C NMR}$  (101 MHz,  $\text{CDCl}_3$ )  $\delta$  152.08, 145.29, 141.79, 140.19, 136.82, 136.26, 131.03, 129.54, 129.47, 129.24, 128.98, 128.53, 127.37, 124.85, 124.19, 124.03, 121.98, 118.52, 102.02, 83.59, 22.30; HRMS (ESI)  $m/z$ :  $[\text{M}+\text{H}]^+$   $\text{C}_{25}\text{H}_{16}\text{NO}$  Calcd. for: 346.1232 found 346.1230.

**9-chloro-11-hydroxy-11-phenyl-11H-benzo[a]fluorene-6-carbonitrile (2i):** White solid (55.05mg, 75%)

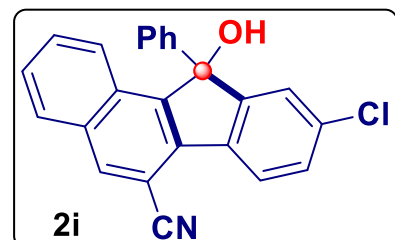

mp 296-298 °C;  $^1\text{H NMR}$  (400 MHz,  $\text{CDCl}_3$ )  $\delta$  8.49 – 8.30 (m, 1H), 8.00 (ddd,  $J = 58.1, 9.4, 2.9$  Hz, 2H), 7.67 (ddt,  $J = 16.8, 13.5, 7.5$  Hz, 1H), 7.56 – 7.38 (m, 5H), 7.32 – 7.16 (m, 5H), 3.34 (s, 1H);  $^{13}\text{C NMR}$  (100 MHz,  $\text{CDCl}_3$ )  $\delta$  147.22, 146.59, 140.02, 139.58, 137.38, 136.32, 134.24, 133.96, 132.88, 131.77, 131.20, 130.75, 130.49, 130.40, 129.99, 129.91, 129.51,

129.36, 129.15, 128.90, 128.70, 128.60, 128.26, 128.18, 127.46, 127.35, 125.91, 125.62, 124.93, 120.45, 118.16, 102.83, 85.04; HRMS (ESI)  $m/z$ :  $[M+H]^+$   $C_{24}H_{15}ClNO$  Calcd for : 368.0842; found 368.0837.

**9-bromo-11-hydroxy-11-phenyl-11H-benzo[*a*]fluorene-6-carbonitrile (2j):** White solid (58.36mg, 71%)

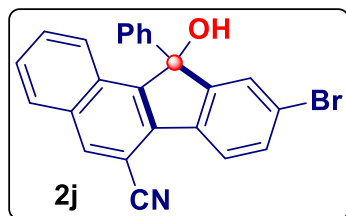

mp 213-215 °C;  $^1H$  NMR (400 MHz,  $CDCl_3$ )  $\delta$  8.48 – 8.40 (m, 1H), 8.29 (s, 1H), 8.20 – 8.12 (m, 1H), 7.87 (dd,  $J = 7.0, 2.5$  Hz, 1H), 7.55 – 7.48 (m, 2H), 7.45 – 7.29 (m, 4H), 7.27 – 7.19 (m, 3H), 3.50 (s, 1H);  $^{13}C$  NMR (100 MHz,  $CDCl_3$ )  $\delta$  148.75, 146.61, 140.49, 139.48, 137.41, 136.31, 133.96, 133.05, 132.88, 131.80, 131.29, 130.50, 130.39, 129.89, 129.35, 129.15, 128.70, 128.61,

128.27, 128.13, 127.45, 127.31, 125.95, 124.94, 120.98, 119.16, 118.18, 102.76, 85.70; HRMS (ESI)  $m/z$ :  $[M-H]^-$  Calcd for :  $C_{24}H_{13}BrNO$  410.0181; found 410.0192.

**13-hydroxy-13-phenyl-13H-indeno[2,1-*a*]anthracene-5-carbonitrile (2k):** White solid (49.79mg, 65%)

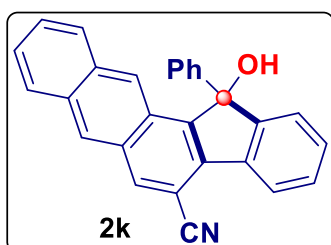

mp 289-291 °C;  $^1H$  NMR (400 MHz,  $CDCl_3$ )  $\delta$  8.56 (d,  $J = 8.5$  Hz, 1H), 8.25 (s, 1H), 8.20 (dd,  $J = 8.1, 1.0$  Hz, 1H), 8.16 – 8.09 (m, 1H), 7.97 (d,  $J = 8.5$  Hz, 1H), 7.86 (ddd,  $J = 6.0, 3.1, 1.9$  Hz, 2H), 7.53 – 7.36 (m, 6H), 7.22 (dd,  $J = 11.6, 4.4$  Hz, 2H), 7.17 – 7.09 (m, 1H), 2.73 (s, 1H);  $^{13}C$  NMR (100 MHz,  $CDCl_3$ )  $\delta$  148.27, 146.69, 141.16, 136.99, 135.83, 135.00, 134.27, 132.39, 130.94, 130.31, 129.69, 129.17, 128.95, 128.49, 127.09, 127.04, 126.96, 126.24, 125.09, 124.27, 123.93,

119.17, 118.59, 102.75, 85.04; HRMS (ESI)  $m/z$ :  $[M-H]^-$   $C_{28}H_{16}NO$  Calcd for: 382.1232; found 382.1234.

**13-hydroxy-13-phenyl-13H-dibenzo[*a,i*]fluorene-6-carbonitrile (2l):** White solid (50.55mg, 66%) mp.

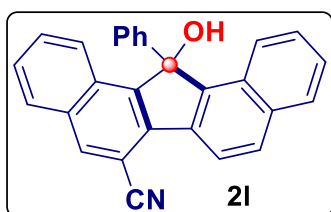

243-245 °C;  $^1H$  NMR (400 MHz,  $CDCl_3$ )  $\delta$  9.39 (d,  $J = 8.7$  Hz, 1H), 8.46 (dd,  $J = 23.9, 21.7$  Hz, 1H), 8.33 (dd,  $J = 21.7, 5.4$  Hz, 1H), 7.88 (dd,  $J = 46.4, 8.6$  Hz, 1H), 7.75 (t,  $J = 5.6$  Hz, 2H), 7.57 (dd,  $J = 12.3, 7.5$  Hz, 1H), 7.49 (dd,  $J = 7.7, 7.0$  Hz, 1H), 7.44 – 7.39 (m, 3H), 7.38 – 7.29 (m, 3H), 7.24 (dd,  $J = 7.6, 4.0$  Hz, 1H), 7.16 – 7.12 (m, 2H), 2.97 (s, 1H);  $^{13}C$  NMR (100 MHz,  $CDCl_3$ )  $\delta$  151.46, 145.91, 141.09, 140.29, 137.64, 137.41, 135.00, 134.92, 134.45, 133.64, 133.15,

132.47, 131.43, 131.16, 130.01, 129.80, 129.51, 129.36, 129.34, 129.26, 128.63, 128.55, 128.41, 128.22, 128.16, 128.07, 127.58, 127.52, 127.48, 127.09, 127.04, 126.25, 126.02, 124.31, 124.17, 122.11, 118.42, 103.10, 85.30; HRMS (ESI)  $m/z$ :  $[M+H]^+$   $C_{28}H_{18}NO$  Calcd for : 384.1388; found 384.1384.

**11-hydroxy-11-(naphthalen-1-yl)-11H-benzo[*a*]fluorene-6-carbonitrile (2m):** White solid (52.08mg, 68%)

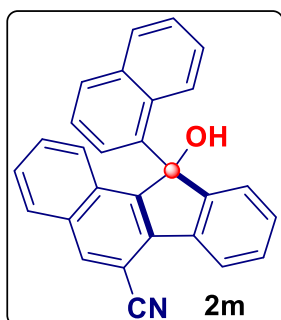

mp 234-235 °C;  $^1H$  NMR (400 MHz,  $CDCl_3$ )  $\delta$  8.82 (d,  $J = 6.4$  Hz, 1H), 8.54 (d,  $J = 7.7$  Hz, 1H), 8.34 (s, 1H), 7.87 (dd,  $J = 16.5, 8.3$  Hz, 2H), 7.78 – 7.70 (m, 3H), 7.49 (t,  $J = 7.5$  Hz, 1H), 7.40 (t,  $J = 7.2$  Hz, 1H), 7.31 (t,  $J = 7.7$  Hz, 1H), 7.25 (s, 1H), 7.21 – 7.14 (m, 2H), 6.90 – 6.81 (m, 2H), 2.61 (s, 1H);  $^{13}C$  NMR (100 MHz,  $CDCl_3$ )  $\delta$  151.39, 147.19, 137.38, 137.08, 136.72, 135.86, 134.09, 132.65, 131.13, 129.93, 129.76, 129.65, 129.39, 129.16, 128.77, 127.22, 125.98, 125.36, 125.15, 124.96, 124.06, 123.52, 122.59, 118.43, 110.07, 103.39, 82.65; HRMS (ESI)  $m/z$ :  $[M-H]^-$

**11-hydroxy-11-(*p*-tolyl)-11H-benzo[*a*]fluorene-6-carbonitrile (2n):** White solid (55.52mg, 80%) mp 224-

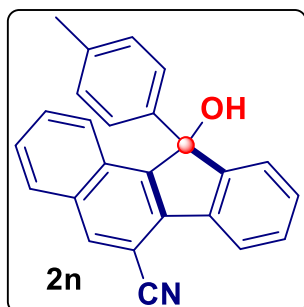

226 °C; <sup>1</sup>H NMR (400 MHz, CDCl<sub>3</sub>) δ 8.39 (d, *J* = 7.7 Hz, 1H), 8.32 (s, 1H), 7.96 – 7.89 (m, 2H), 7.54 – 7.41 (m, 3H), 7.39 – 7.29 (m, 2H), 7.21 – 7.12 (m, 3H), 7.07 – 7.01 (m, 1H), 2.41 (s, 1H), 2.26 (s, 3H); <sup>13</sup>C NMR (100 MHz, CDCl<sub>3</sub>) δ 152.03, 146.32, 141.60, 138.21, 137.06, 136.75, 136.32, 132.65, 130.83, 129.69, 129.47, 129.33, 129.17, 128.43, 128.28, 127.11, 125.36, 125.23, 124.22, 121.99, 121.91, 118.35, 102.95, 83.56, 21.59; HRMS (ESI) *m/z*: [M<sup>+</sup>H] C<sub>25</sub>H<sub>16</sub>NO Calcd for: 346.1232 found, 346.1241

**11-(4-fluorophenyl)-11-hydroxy-11H-benzo[*a*]fluorene-6-carbonitrile (2o):** White solid (53.35mg, 76%)

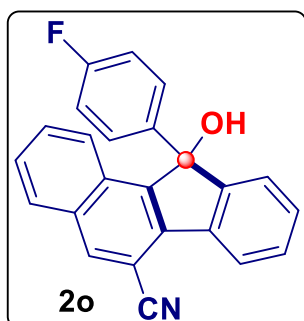

mp 200-202 °C; <sup>1</sup>H NMR (400 MHz, CDCl<sub>3</sub>) δ 8.44 – 8.39 (m, 1H), 8.34 (s, 1H), 7.95 – 7.88 (m, 2H), 7.55 – 7.45 (m, 3H), 7.39 – 7.31 (m, 2H), 7.25 – 7.22 (m, 1H), 7.18 (td, *J* = 8.0, 5.9 Hz, 1H), 7.01 (dd, *J* = 6.6, 1.3 Hz, 1H), 6.91 (tdd, *J* = 8.4, 2.6, 0.9 Hz, 1H), 2.53 (s, 1H); <sup>13</sup>C NMR (100 MHz, CDCl<sub>3</sub>) δ 164.12, 162.32 (d, *J*<sub>C-F</sub> = 254.0 Hz), 151.39, 145.72, 144.52, 137.31, 136.77, 136.25, 132.72, 130.71, 130.19, 130.13 (d, *J*<sub>C-F</sub> = 9.0 Hz), 129.87, 129.81 13 (d, *J*<sub>C-F</sub> = 8.5 Hz), 129.45, 129.27 13 (d, *J*<sub>C-F</sub> = 27.0 Hz), 127.28, 125.00, 124.19, 122.16, 120.58, 120.56, 118.18, 114.49, 114.35 (d, *J*<sub>C-F</sub> = 21 Hz), 112.35, 112.20(d, *J*<sub>C-F</sub> = 22.5 Hz), 103.04, 83.18; HRMS

(ESI) *m/z*: [M-H]<sup>-</sup> C<sub>24</sub>H<sub>13</sub>FNO Calcd for: 350.0981;found 350.0983.

**8-chloro-11-hydroxy-3-methyl-11-phenyl-11H-benzo[*a*]fluorene-6-carbonitrile (2p):** White solid

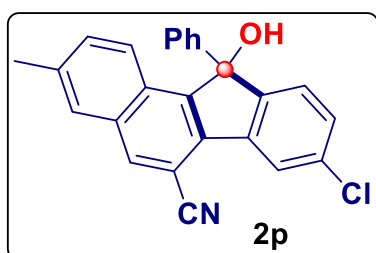

(53.34mg, 70%) mp 225-226 °C; <sup>1</sup>H NMR (400 MHz, CDCl<sub>3</sub>) δ 8.25 (d, *J* = 7.7 Hz, 1H), 8.15 (s, 1H), 8.05 (d, *J* = 9.1 Hz, 1H), 7.83 (d, *J* = 2.0 Hz, 1H), 7.46 – 7.32 (m, 4H), 7.25 – 7.14 (m, 3H), 7.08 (d, *J* = 7.6 Hz, 1H), 2.47 (d, *J* = 21.4 Hz, 1H), 2.17 (s, 3H); <sup>13</sup>C NMR (100 MHz, CDCl<sub>3</sub>) δ 148.75, 147.36, 139.98, 137.11, 137.07, 135.93, 135.79, 133.17, 133.07, 131.89, 130.48, 129.92, 128.71, 128.68, 128.25, 127.60, 127.11, 126.25, 125.53, 119.51,

118.04, 104.00, 84.47, 17.49; HRMS (ESI) *m/z*: [M-H]<sup>-</sup> C<sub>25</sub>H<sub>15</sub>ClNO Calcd for : 380.0842; found 380.0845.

**(11-hydroxy-11-phenyl-11H-benzo[*a*]fluoren-6-yl)ethan-1-one (2q):** White solid (54.60mg, 78%) mp 225-

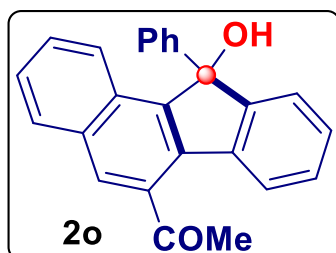

227 °C; <sup>1</sup>H NMR (400 MHz, CDCl<sub>3</sub>) δ 8.13 (s, 1H), 7.97 (d, *J* = 7.7 Hz, 1H), 7.92 (d, *J* = 8.1 Hz, 1H), 7.70 (dd, *J* = 8.4, 0.7 Hz, 1H), 7.44 (ddd, *J* = 8.1, 6.8, 1.2 Hz, 1H), 7.38 (ddd, *J* = 8.2, 6.8, 1.3 Hz, 1H), 7.34 – 7.29 (m, 2H), 7.25 – 7.18 (m, 4H), 7.14 – 7.07 (m, 2H), 2.88 (s, 3H); <sup>13</sup>C NMR (100 MHz, CDCl<sub>3</sub>) δ 202.72, 149.48, 145.13, 141.48, 139.39, 135.87, 134.45, 131.88, 131.26, 129.38, 129.27, 128.97, 128.13, 127.99, 127.30, 127.16, 126.88, 126.23, 124.80, 124.71,

123.59, 53.75, 30.26; HRMS (ESI) *m/z*: [M+H]<sup>+</sup> C<sub>25</sub>H<sub>19</sub>O<sub>2</sub> Calcd for : 351.1307; found 351.1310.

**11-phenyl-6-tosyl-11H-benzo[*a*]fluoren-11-ol (2r):** White solid (66.88mg, 88%) mp 240-242 °C; <sup>1</sup>H NMR (400 MHz, CDCl<sub>3</sub>) δ 8.38 (s, 1H), 8.29 – 8.22 (m, 1H), 7.97 – 7.90 (m, 1H), 7.74 – 7.68 (m, 1H), 7.45 – 7.31 (m, 4H), 7.25 – 7.20 (m, 3H), 7.12 – 7.08 (m, 2H), 4.60 (q, *J* = 7.1 Hz, 2H), 1.53 (d, *J* = 7.2 Hz, 3H); <sup>13</sup>C NMR (100 MHz, CDCl<sub>3</sub>) δ 168.45, 149.47, 144.82, 141.60, 139.44, 131.90, 131.48, 131.38, 129.51, 128.96, 128.14, 127.98, 127.25, 127.10, 126.85, 126.08, 125.54, 124.73, 124.63, 124.02, 61.53, 53.74, 14.41; HRMS (ESI) *m/z*: [M+H]<sup>+</sup> C<sub>26</sub>H<sub>20</sub>O<sub>3</sub> Calcd for : 380.4430; found 380.4430.

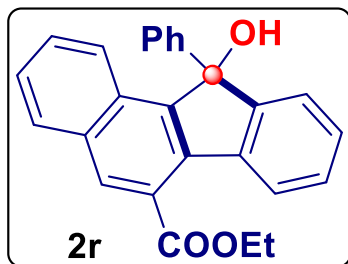

**ethyl-11-hydroxy-9-methyl-11-phenyl-11H-benzo[*a*]fluorene-6-carboxylate (2s):** White solid (67.77mg, 86%) mp 210-212 °C; <sup>1</sup>H NMR (400 MHz, CDCl<sub>3</sub>) δ 9.04 (s, 1H), 8.48 (dd, *J* = 18.4, 17.2 Hz, 1H), 8.36 (s, 1H), 8.22 – 8.16 (m, 1H), 8.02 (d, *J* = 8.4 Hz, 1H), 7.84 – 7.79 (m, 1H), 7.72 – 7.66 (m, 2H), 7.41 (ddd, *J* = 7.7, 4.5, 1.2 Hz, 3H), 7.36 – 7.29 (m, 2H), 7.22 (ddd, *J* = 11.7, 5.1, 3.2 Hz, 3H), 7.11 (s, 1H), 4.57 (q, *J* = 7.1 Hz, 2H), 2.36 (s, 3H), 1.52 (d, *J* = 7.1 Hz, 3H); <sup>13</sup>C NMR (100 MHz, CDCl<sub>3</sub>) δ 168.17, 152.46, 145.66, 142.67, 141.07, 138.61, 137.98, 135.64, 134.57, 132.90, 131.32, 131.20, 131.01, 130.68, 130.57, 130.28, 130.20, 129.68, 129.23, 128.86, 128.82, 128.37, 128.27, 127.02, 126.31, 124.96, 124.86, 124.57, 124.32, 124.05, 123.84, 120.52, 118.16, 83.50, 61.51, 22.56, 22.24, 14.40; HRMS (ESI) *m/z*: [M+H]<sup>+</sup> C<sub>26</sub>H<sub>20</sub>O<sub>3</sub> Calcd for : 380.4430; found 380.4430.

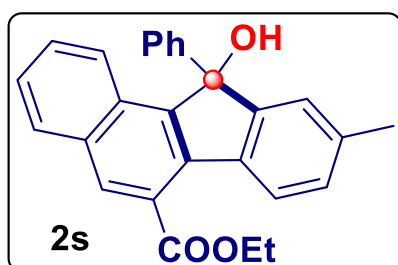

**4-(1-formylcyclopropyl)-3-phenyl-2-naphthonitrile (4a):** Off-White solid (51.68mg, 87%) mp 207-209 °C; <sup>1</sup>H NMR (400 MHz, CDCl<sub>3</sub>) δ 8.96 (s, 1H), 8.35 (s, 1H), 8.08 (d, *J* = 8.6 Hz, 1H), 7.96 (d, *J* = 8.0 Hz, 1H), 7.70 (ddd, *J* = 8.5, 6.9, 1.4 Hz, 1H), 7.65 – 7.59 (m, 1H), 7.57 – 7.49 (m, 1H), 7.49 – 7.38 (m, 3H), 7.20 (d, *J* = 7.4 Hz, 1H), 1.89 (ddd, *J* = 9.9, 7.5, 4.7 Hz, 1H), 1.35 (ddd, *J* = 8.9, 7.6, 4.7 Hz, 1H), 1.18 (ddd, *J* = 9.9, 7.6, 5.8 Hz, 1H), 0.91 (ddd, *J* = 9.0, 7.5, 5.8 Hz, 1H); <sup>13</sup>C NMR (101 MHz, CDCl<sub>3</sub>) δ 200.08, 141.92, 137.75, 135.76, 135.19, 132.73, 131.86, 129.82, 129.58, 129.32, 129.24, 128.53, 128.37, 127.29, 125.29, 118.37, 111.58, 34.21, 19.27, 17.41; HRMS (ESI) *m/z*: [M+H]<sup>+</sup> C<sub>21</sub>H<sub>15</sub>NO Calcd for : 298.1154; found 298.1157.

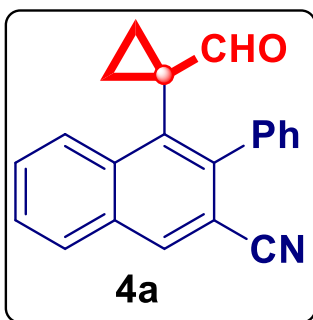

**8-(1-formylcyclopropyl)-7-phenylnaphtho[2,3-*d*][1,3]dioxole-6-carbonitrile (4b):** Light brown solid (54.56mg, 80%) mp 268-270 °C; <sup>1</sup>H NMR (400 MHz, DMSO-*d*<sub>6</sub> + CDCl<sub>3</sub>) δ 8.85 (s, 1H), 8.12 (s, 1H), 7.57 – 7.36 (m, 5H), 7.34 (s, 1H), 7.15 (d, *J* = 7.5 Hz, 1H), 6.15 (d, *J* = 3.3 Hz, 2H), 1.93 – 1.83 (m, 1H), 1.32 – 1.27 (m, 1H), 1.20 – 1.10 (m, 1H), 0.92 – 0.85 (m, 1H). <sup>13</sup>C NMR (101 MHz, CDCl<sub>3</sub>) δ 199.68, 150.46, 148.04, 140.30, 137.42, 133.23, 132.99, 131.01, 128.87, 128.78, 127.82, 127.78, 127.73, 118.18, 108.86, 104.04, 101.51, 101.31, 34.13, 18.40, 16.93; HRMS (ESI) *m/z*: [M+H]<sup>+</sup> C<sub>22</sub>H<sub>16</sub>NO<sub>3</sub> Calcd for : 342.3660; found 342.3662.

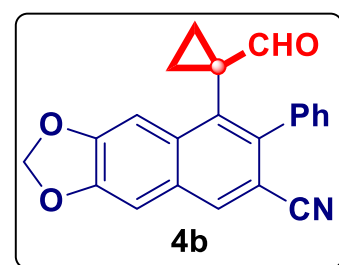



**4-(1-formylcyclopropyl)-7-methoxy-3-phenyl-2-naphthonitrile (4c):** Light brown solid (53.62mg, 82%)

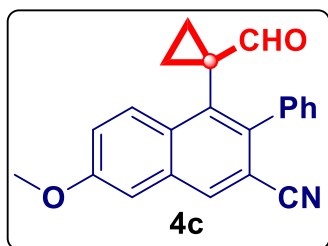

mp 228-230 °C;  $^1\text{H}$  NMR (400 MHz,  $\text{CDCl}_3$ )  $\delta$  8.95 (s, 1H), 8.22 (s, 1H), 7.98 (d,  $J = 9.3$  Hz, 1H), 7.55 – 7.48 (m, 1H), 7.48 – 7.38 (m, 3H), 7.34 (dd,  $J = 9.3, 2.7$  Hz, 1H), 7.19 (dd,  $J = 12.6, 5.0$  Hz, 2H), 3.96 (s, 3H), 1.86 (ddd,  $J = 9.9, 7.4, 4.6$  Hz, 1H), 1.33 (ddd,  $J = 9.0, 7.6, 4.7$  Hz, 1H), 1.16 (ddd,  $J = 9.9, 7.5, 5.7$  Hz, 1H), 0.90 (ddd,  $J = 9.0, 7.4, 5.7$  Hz, 1H);  $^{13}\text{C}$  NMR (101 MHz,  $\text{CDCl}_3$ )  $\delta$  200.13, 158.44, 139.88, 137.83, 134.23, 133.37, 132.64, 130.71, 129.70, 129.43, 128.47, 128.36, 128.33, 126.85, 122.63, 118.54, 112.00, 106.62, 55.56, 34.26, 19.34, 17.42; HRMS (ESI)  $m/z$ :  $[\text{M}+\text{H}]^+$

$\text{C}_{22}\text{H}_{18}\text{NO}_2$  Calcd for : 328.3830; found 327.3830.

**4-(1-formylcyclopropyl)-6-methyl-3-phenyl-2-naphthonitrile (4d):** Off-white solid (52.25mg, 84%) mp

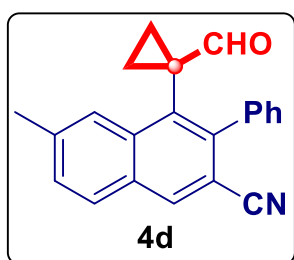

248-250 °C;  $^1\text{H}$  NMR (400 MHz,  $\text{CDCl}_3$ )  $\delta$  8.97 (s, 1H), 8.28 (s, 1H), 7.89 – 7.77 (m, 2H), 7.58 – 7.35 (m, 5H), 7.19 (d,  $J = 7.4$  Hz, 1H), 2.57 (s, 3H), 1.88 (ddd,  $J = 9.9, 7.5, 4.7$  Hz, 1H), 1.33 (ddd,  $J = 8.9, 7.7, 4.7$  Hz, 1H), 1.16 (ddd,  $J = 9.9, 7.6, 5.7$  Hz, 1H), 0.90 (ddd,  $J = 8.9, 7.5, 5.7$  Hz, 1H);  $^{13}\text{C}$  NMR (100 MHz,  $\text{CDCl}_3$ )  $\delta$  200.33, 142.01, 140.25, 137.91, 135.44, 135.39, 131.89, 130.14, 129.56, 129.53, 129.32, 129.05, 128.45, 128.42, 128.30, 124.27, 118.58, 110.49, 34.14, 22.60, 19.39, 17.61; HRMS (ESI)  $m/z$ :  $[\text{M}+\text{H}]^+$   $\text{C}_{22}\text{H}_{17}\text{NO}$  Calcd for : 312.3840; found 312.3842.

**7-fluoro-4-(1-formylcyclopropyl)-3-phenyl-2-naphthonitrile (4e):** Light brown solid (45.68mg, 73%)

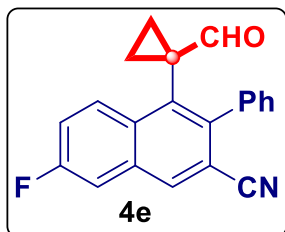

mp 226-228 °C;  $^1\text{H}$  NMR (400 MHz,  $\text{CDCl}_3$ )  $\delta$  8.91 (s, 1H), 8.27 (s, 1H), 8.09 (dd,  $J = 9.4, 5.3$  Hz, 1H), 7.61 – 7.38 (m, 6H), 7.18 (d,  $J = 7.5$  Hz, 1H), 1.89 (ddd,  $J = 9.9, 7.5, 4.7$  Hz, 1H), 1.34 (ddd,  $J = 8.9, 7.6, 4.7$  Hz, 1H), 1.18 (ddd,  $J = 9.9, 7.5, 5.9$  Hz, 1H), 0.93 (ddd,  $J = 8.9, 7.4, 5.9$  Hz, 1H);  $^{13}\text{C}$  NMR (101 MHz,  $\text{CDCl}_3$ )  $\delta$  199.75, 162.29, 159.80 (d,  $J_{\text{C-F}} = 249.0$  Hz), 137.44, 134.77, 134.71 (d,  $J_{\text{C-F}} = 6.0$  Hz), 132.92, 132.83, 132.24, 129.51, 129.30 (d,  $J_{\text{C-F}} = 21.0$  Hz), 128.65, 128.59, 128.43, 128.15,

128.06, 120.16, 119.92 (d,  $J_{\text{C-F}} = 24.0$  Hz), 117.99, 112.95, 112.33, 112.12 (d,  $J_{\text{C-F}} = 21.0$  Hz), 34.38, 19.04, 17.21; HRMS (ESI)  $m/z$ :  $[\text{M}+\text{H}]^+$   $\text{C}_{21}\text{H}_{15}\text{FNO}$  Calcd for : 316.3474; found 316.3476.

**7-chloro-4-(1-formylcyclopropyl)-3-phenyl-2-naphthonitrile (4f):** Light brown solid (50.31mg, 76%) mp

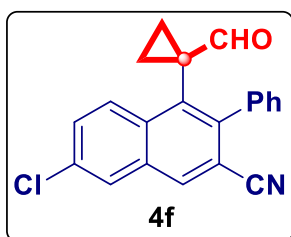

211-214 °C;  $^1\text{H}$  NMR (400 MHz,  $\text{CDCl}_3$ )  $\delta$  8.89 (s, 1H), 8.24 (s, 1H), 8.02 (d,  $J = 9.1$  Hz, 1H), 7.93 (d,  $J = 2.1$  Hz, 1H), 7.62 (dd,  $J = 9.1, 2.2$  Hz, 1H), 7.57 – 7.35 (m, 4H), 7.18 (d,  $J = 7.5$  Hz, 1H), 1.88 (ddd,  $J = 9.9, 7.4, 4.7$  Hz, 1H), 1.33 (ddd,  $J = 8.9, 7.6, 4.7$  Hz, 1H), 1.18 (ddd,  $J = 9.9, 7.5, 5.9$  Hz, 1H), 0.92 (ddd,  $J = 8.9, 7.4, 5.9$  Hz, 1H);  $^{13}\text{C}$  NMR (101 MHz,  $\text{CDCl}_3$ )  $\delta$  199.65, 142.19, 137.34, 134.56, 133.49, 133.40, 133.01, 132.52, 130.57, 129.43, 129.21, 128.71, 128.59, 128.43,

127.63, 127.03, 117.91, 112.91, 34.24, 18.95, 17.07; HRMS (ESI)  $m/z$ :  $[\text{M}+\text{H}]^+$   $\text{C}_{21}\text{H}_{15}\text{ClNO}$  Calcd for : 332.7990; found 332.7993.

**3-(4-(tert-butyl)phenyl)-4-(1-formylcyclopropyl)-2-naphthonitrile (4g):** Off-white solid (67.07mg, 95%)

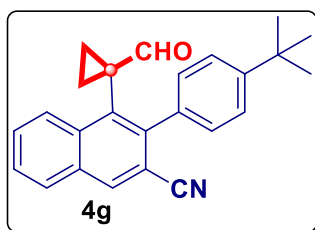

mp 265-267 °C;  $^1\text{H}$  NMR (400 MHz,  $\text{CDCl}_3$ )  $\delta$  9.05 – 8.97 (m, 1H), 8.33 (s, 1H), 8.07 (d,  $J = 8.2$  Hz, 1H), 7.94 (d,  $J = 8.0$  Hz, 1H), 7.69 (ddd,  $J = 8.5, 6.9, 1.4$  Hz, 1H), 7.65 – 7.57 (m, 1H), 7.52 (d,  $J = 7.7$  Hz, 1H), 7.39 (t,  $J = 9.0$  Hz, 2H), 7.11 (d,  $J = 8.1$  Hz, 1H), 1.88 (ddd,  $J = 9.9, 7.5, 4.7$  Hz, 1H), 1.39 (d,  $J = 12.4$  Hz, 9H), 1.34 – 1.29 (m, 1H), 1.16 (ddd,  $J = 9.9, 7.6, 5.8$  Hz, 1H), 0.88 (ddd,  $J = 8.9, 7.5, 5.8$  Hz, 1H);  $^{13}\text{C}$  NMR (101 MHz,  $\text{CDCl}_3$ )  $\delta$  200.30, 151.48, 141.99, 135.78,

135.25, 134.62, 132.77, 131.77, 129.73, 129.33, 129.20, 128.96, 127.14, 125.28, 125.19, 118.53, 111.67, 34.69, 34.19, 31.33, 19.55, 17.54; HRMS (ESI)  $m/z$ :  $[\text{M}+\text{H}]^+$   $\text{C}_{25}\text{H}_{24}\text{NO}$  Calcd for : 354.1780; found 354.1778.

**3-(3,4-dimethylphenyl)-4-(1-formylcyclopropyl)-2-naphthonitrile (4h):** White solid (59.80mg, 92%) mp

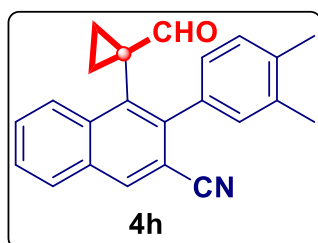

258-260 °C;  $^1\text{H}$  NMR (400 MHz,  $\text{CDCl}_3$ )  $\delta$  9.00 (d,  $J = 8.5$  Hz, 1H), 8.32 (s, 1H), 8.07 (dd,  $J = 8.5, 2.5$  Hz, 1H), 7.94 (d,  $J = 8.0$  Hz, 1H), 7.65 (dt,  $J = 14.8, 7.2$  Hz, 2H), 7.26 – 7.11 (m, 2H), 6.97 – 6.87 (m, 1H), 2.31 (t,  $J = 22.3$  Hz, 6H), 1.88 (ddd,  $J = 9.8, 7.5, 4.6$  Hz, 1H), 1.33 (td,  $J = 8.3, 4.7$  Hz, 1H), 1.25 – 1.14 (m, 1H), 1.01 – 0.89 (m, 1H);  $^{13}\text{C}$  NMR (150 MHz,  $\text{CDCl}_3$ )  $\delta$  200.25, 200.18, 142.26, 136.89, 136.66, 136.47, 135.68, 135.61, 135.28, 135.20, 132.64, 131.77, 130.71, 130.38,

129.74, 129.69, 129.58, 129.20, 127.10, 126.69, 125.29, 118.53, 111.89, 34.16, 19.88, 19.72, 19.64, 19.58, 17.71; HRMS (ESI)  $m/z$ :  $[\text{M}+\text{H}]^+$   $\text{C}_{23}\text{H}_{20}\text{NO}$  Calcd for : 326.1467; found 326.1465.

**4-(1-formylcyclopropyl)-3-(p-tolyl)-2-naphthonitrile (4i):** White solid (55.98mg, 90%) mp 253-255 °C;  $^1\text{H}$

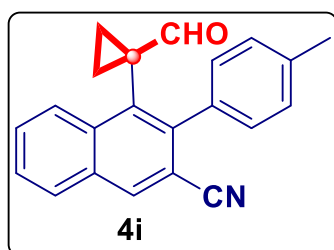

NMR (400 MHz,  $\text{CDCl}_3$ )  $\delta$  8.98 (s, 1H), 8.33 (s, 1H), 8.07 (d,  $J = 8.5$  Hz, 1H), 7.95 (d,  $J = 8.1$  Hz, 1H), 7.73 – 7.58 (m, 2H), 7.33 (s, 2H), 7.14 (dd,  $J = 52.0, 7.8$  Hz, 2H), 2.43 (s, 3H), 1.89 (ddd,  $J = 9.8, 7.5, 4.6$  Hz, 1H), 1.37 – 1.31 (m, 1H), 1.21 (ddd,  $J = 9.8, 7.5, 5.7$  Hz, 1H), 0.93 (ddd,  $J = 8.9, 7.5, 5.7$  Hz, 1H);  $^{13}\text{C}$  NMR (101 MHz,  $\text{CDCl}_3$ )  $\delta$  200.21, 142.02, 138.30, 135.70, 135.23, 134.77, 132.69, 131.79, 129.75, 129.45, 129.22, 129.15, 129.08, 127.17, 125.27, 118.52, 111.91,

34.20, 21.36, 19.45, 17.60; HRMS (ESI)  $m/z$ :  $[\text{M}+\text{H}]^+$   $\text{C}_{22}\text{H}_{17}\text{NO}$  Calcd for : 312.3840; found 312.3842.

**4-(1-formylcyclopropyl)-3-(m-tolyl)-2-naphthonitrile (4j):** Off-white solid (53.49mg, 86%) mp 236-238 °C;

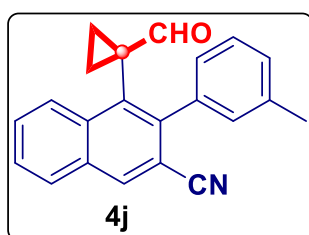

$^1\text{H}$  NMR (400 MHz,  $\text{CDCl}_3$ )  $\delta$  8.98 (s, 1H), 8.29 (s, 1H), 7.87 – 7.79 (m, 2H), 7.55 – 7.49 (m, 1H), 7.48 – 7.38 (m, 4H), 7.19 (d,  $J = 7.5$  Hz, 1H), 2.57 (s, 3H), 1.88 (ddd,  $J = 9.9, 7.5, 4.7$  Hz, 1H), 1.33 (ddd,  $J = 8.9, 7.7, 4.7$  Hz, 1H), 1.17 (ddd,  $J = 9.9, 7.6, 5.7$  Hz, 1H), 0.90 (ddd,  $J = 8.9, 7.5, 5.7$  Hz, 1H);  $^{13}\text{C}$  NMR (101 MHz,  $\text{CDCl}_3$ )  $\delta$  200.35, 142.02, 140.26, 137.91, 135.45, 135.40, 131.88, 130.14, 129.57, 129.54, 129.32, 129.06, 128.46, 128.43, 128.31, 124.27, 118.58,

110.50, 34.15, 22.61, 19.40, 17.63; HRMS (ESI)  $m/z$ :  $[\text{M}+\text{H}]^+$   $\text{C}_{22}\text{H}_{17}\text{NO}$  Calcd for : 312.3840; found

**4-(1-formylcyclopropyl)-3-(o-tolyl)-2-naphthonitrile (2k mixture of isomers):** Off white solid (54.11mg, 87%) mp 194-196 °C; <sup>1</sup>H NMR (597 MHz, CDCl<sub>3</sub>) δ 9.06 (s, 1H), 8.90 (s, 1H), 8.35 (s, 1H), 8.32 (s, 1H), 8.10 (d, *J* = 8.5 Hz, 1H), 7.96 (d, *J* = 8.1 Hz, 1H), 7.73 – 7.67 (m, 1H), 7.66 – 7.60 (m, 1H), 7.39 – 7.33 (m, 2H), 7.32 (s, 1H), 7.24 – 7.19 (m, 1H), 7.16 (d, *J* = 7.5 Hz, 1H), 7.05 (d, *J* = 7.5 Hz, 1H), 2.17 (d, *J* = 11.1 Hz, 3H), 2.00 (s, 1H), 1.88 (ddd, *J* = 9.9, 7.4, 4.7 Hz, 1H), 1.83 – 1.75 (m, 1H), 1.40 (ddd, *J* = 8.9, 7.7, 4.7 Hz, 1H), 1.30 (tdd, *J* = 16.2, 13.9, 8.4 Hz, 1H), 1.11 (ddd, *J* = 9.9, 7.6, 5.8 Hz, 1H), 0.88 (ddd, *J* = 8.9, 7.4, 5.8 Hz, 1H); <sup>13</sup>C NMR (150 MHz, CDCl<sub>3</sub>) δ 199.69, 199.51, 141.71, 137.49, 135.57, 135.42, 135.36, 135.20, 132.68, 132.01, 131.91, 130.71, 130.33, 129.91, 129.79, 129.72, 129.59, 129.30, 128.87, 128.70, 127.31, 127.26, 126.14, 125.44, 125.35, 125.21, 118.04, 112.06, 33.97, 19.87, 19.81, 19.74, 18.62, 17.80, 16.08; HRMS (ESI) *m/z*: [M+H]<sup>+</sup> C<sub>22</sub>H<sub>17</sub>NO Calcd for : 312.3840; found 312.3842.

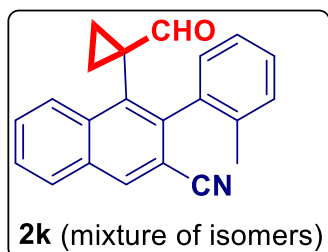

**3-(4-chlorophenyl)-4-(1-formylcyclopropyl)-2-naphthonitrile (4l):** Light brown solid (50.97mg, 77%) mp 253-255 °C; <sup>1</sup>H NMR (400 MHz, CDCl<sub>3</sub>) δ 8.91 (s, 1H), 8.34 (s, 1H), 8.07 (d, *J* = 8.5 Hz, 1H), 7.95 (d, *J* = 7.9 Hz, 1H), 7.71 (ddd, *J* = 8.5, 6.9, 1.3 Hz, 1H), 7.67 – 7.61 (m, 1H), 7.52 (dd, *J* = 8.2, 2.1 Hz, 1H), 7.40 (ddd, *J* = 8.1, 5.9, 2.1 Hz, 2H), 7.15 (dd, *J* = 8.2, 2.1 Hz, 1H), 1.92 (ddd, *J* = 9.9, 7.4, 4.8 Hz, 1H), 1.41 – 1.34 (m, 1H), 1.24 (ddd, *J* = 9.9, 7.5, 5.8 Hz, 1H), 0.90 (ddd, *J* = 8.9, 7.4, 5.7 Hz, 1H); <sup>13</sup>C NMR (101 MHz, CDCl<sub>3</sub>) δ 199.82, 140.52, 136.20, 135.87, 135.07, 134.77, 132.90, 131.92, 131.19, 130.93, 130.64, 129.99, 129.26, 129.16, 128.98, 128.82, 128.68, 127.51, 125.26, 118.18, 111.20, 67.05, 34.25, 19.02, 17.29; HRMS (ESI) *m/z*: [M+H]<sup>+</sup> C<sub>21</sub>H<sub>15</sub>ClNO Calcd for : 332.7990; found 332.7993.

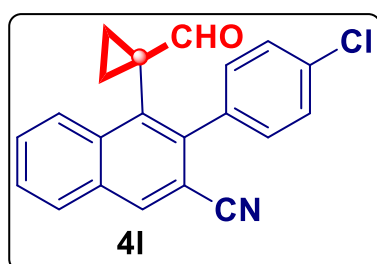

**3-(3-chlorophenyl)-4-(1-formylcyclopropyl)-2-naphthonitrile (4m isomers):** Light brown solid (52.30mg, 79%) mp 209-211 °C; <sup>1</sup>H NMR (400 MHz, CDCl<sub>3</sub>) δ 8.93 (d, *J* = 10.7 Hz, 1H), 8.35 (s, 1H), 8.08 (d, *J* = 8.5 Hz, 1H), 7.96 (d, *J* = 8.1 Hz, 1H), 7.74 – 7.62 (m, 2H), 7.51 – 7.31 (m, 3H), 7.17 (dd, *J* = 49.4, 4.7 Hz, 1H), 1.96 – 1.88 (m, 1H), 1.38 (ddd, *J* = 10.9, 8.9, 6.8 Hz, 1H), 1.29 – 1.20 (m, 1H), 0.93 (dddd, *J* = 24.0, 8.9, 7.5, 5.8 Hz, 1H); <sup>13</sup>C NMR (101 MHz, CDCl<sub>3</sub>) δ 199.78, 199.55, 139.49, 135.90, 135.06, 134.53, 134.26, 132.94, 131.98, 130.02, 129.85, 129.65, 129.56, 129.35, 129.30, 129.27, 128.80, 128.77, 127.84, 127.62, 127.59, 125.35, 125.28, 118.11, 117.97, 111.11, 34.20, 19.00, 18.84, 17.32, 17.03; HRMS (ESI) *m/z*: [M+H]<sup>+</sup> C<sub>21</sub>H<sub>15</sub>ClNO Calcd for : 332.7990; found 332.7993.

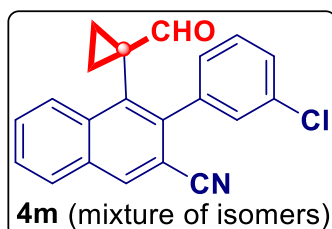

**3-(3-bromophenyl)-4-(1-formylcyclopropyl)-2-naphthonitrile (4n):** Light brown solid (60.75mg, 81%) mp

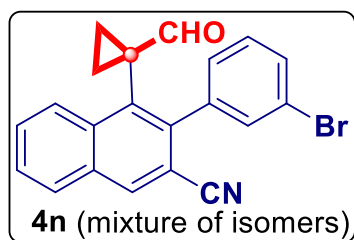

238-240 °C;  $^1\text{H NMR}$  (400 MHz,  $\text{CDCl}_3$ )  $\delta$  8.93 (d,  $J = 13.7$  Hz, 1H), 8.35 (s, 1H), 8.08 (d,  $J = 8.5$  Hz, 1H), 7.96 (d,  $J = 8.1$  Hz, 1H), 7.71 (t,  $J = 7.2$  Hz, 1H), 7.68 – 7.60 (m, 2H), 7.40 (dd,  $J = 6.9, 3.9$  Hz, 1H), 7.29 (t,  $J = 7.7$  Hz, 1H), 7.16 (d,  $J = 7.7$  Hz, 1H), 1.97 – 1.88 (m, 1H), 1.42 – 1.33 (m, 1H), 1.25 (ddd,  $J = 9.9, 8.4, 4.1$  Hz, 1H), 0.93 (ddd,  $J = 29.3, 14.5, 7.4$  Hz, 1H);  $^{13}\text{C NMR}$  (101 MHz,  $\text{CDCl}_3$ )  $\delta$  199.76, 199.50, 139.76, 139.68, 135.90, 135.07, 132.45,

132.19, 132.01, 131.69, 130.08, 130.02, 129.88, 129.30, 129.26, 128.28, 128.05, 127.60, 125.36, 125.28, 122.59, 122.31, 118.11, 117.95, 111.06, 34.21, 19.00, 18.87, 17.34, 17.05; HRMS (ESI)  $m/z$ :  $[\text{M}+\text{H}]^+$   $\text{C}_{21}\text{H}_{15}\text{BrNO}$  Calcd for : 377.2530; found 377.2533.

**1-(1-formylcyclopropyl)-[2,2'-binaphthalene]-3-carbonitrile (4o):** White solid (55.52mg, 80%) mp 223-

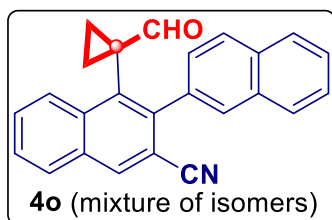

224 °C;  $^1\text{H NMR}$  (400 MHz,  $\text{CDCl}_3$ )  $\delta$  8.99 (s, 1H), 8.93 (s, 1H), 8.38 (d,  $J = 11.4$  Hz, 2H), 8.15 – 8.06 (m, 2H), 8.03 – 7.86 (m, 8H), 7.82 (d,  $J = 7.6$  Hz, 1H), 7.75 – 7.68 (m, 3H), 7.64 (t,  $J = 7.5$  Hz, 2H), 7.54 (ddd,  $J = 19.3, 9.6, 5.1$  Hz, 5H), 7.32 (dd,  $J = 8.4, 1.6$  Hz, 1H), 1.87 (dt,  $J = 10.6, 6.8$  Hz, 2H), 1.36 (ddd,  $J = 16.4, 7.6, 4.8$  Hz, 2H), 1.15 – 1.00 (m, 2H), 0.91 (ddd,  $J = 22.2, 14.1, 7.4$  Hz, 2H);  $^{13}\text{C NMR}$  (101 MHz,  $\text{CDCl}_3$ )  $\delta$  200.13, 199.95, 141.92, 135.94, 135.71,

135.23, 135.19, 133.31, 133.03, 132.97, 132.89, 132.77, 131.94, 131.86, 129.88, 129.27, 128.82, 128.78, 128.38, 128.17, 127.83, 127.79, 127.35, 126.87, 126.73, 126.67, 126.56, 126.54, 125.38, 125.27, 118.47, 118.34, 111.63, 34.34, 19.43, 19.01, 17.47, 17.24; HRMS (ESI)  $m/z$ :  $[\text{M}+\text{H}]^+$   $\text{C}_{25}\text{H}_{18}\text{NO}$  Calcd for : 348.4170; found 348.4171.

**11-chloro-11-phenyl-11H-benzo[a]fluorene-6-carbonitrile (5):** White solid (27.03mg, 77%) mp 257-259

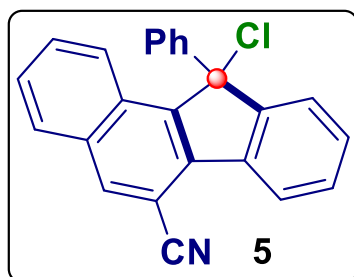

°C;  $^1\text{H NMR}$  (400 MHz,  $\text{CDCl}_3$ )  $\delta$  8.37 (d,  $J = 7.6$  Hz, 1H), 8.31 (s, 1H), 7.95 – 7.87 (m, 2H), 7.52 – 7.41 (m, 3H), 7.41 – 7.34 (m, 3H), 7.31 (td,  $J = 7.4, 0.9$  Hz, 1H), 7.27 – 7.22 (m, 3H);  $^{13}\text{C NMR}$  (101 MHz,  $\text{CDCl}_3$ )  $\delta$  151.94, 146.23, 141.74, 137.10, 136.74, 136.18, 132.64, 130.78, 129.70, 129.52, 129.34, 129.18, 128.56, 127.44, 127.13, 125.16, 124.84, 124.25, 122.00, 118.31, 102.92, 83.65; HRMS (ESI)  $m/z$ :  $[\text{M}+\text{H}]^+$   $\text{C}_{24}\text{H}_{15}\text{ClN}$  Calcd for : 352.8330;

found 352.8332.

**11-methoxy-11-phenyl-11H-benzo[a]fluorene-6-carbonitrile (6):** White solid (28.45mg, 82%) mp 170-172

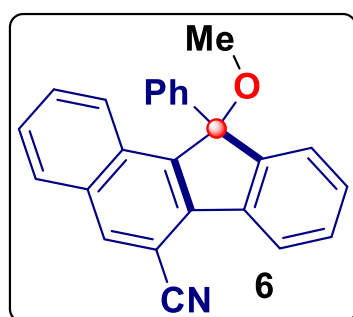

°C;  $^1\text{H NMR}$  (400 MHz,  $\text{CDCl}_3$ )  $\delta$  8.42 (dt,  $J = 7.7, 0.9$  Hz, 1H), 8.34 (s, 1H), 7.95 (dddd,  $J = 18.2, 7.0, 2.6, 1.1$  Hz, 2H), 7.54 – 7.42 (m, 3H), 7.36 – 7.27 (m, 4H), 7.24 – 7.14 (m, 3H), 2.89 (s, 3H);  $^{13}\text{C NMR}$  (101 MHz,  $\text{CDCl}_3$ )  $\delta$  148.62, 143.26, 142.09, 137.95, 137.63, 137.14, 132.17, 131.25, 129.81, 129.35, 129.08, 128.36, 127.28, 127.18, 125.07, 124.79, 124.65, 121.83, 118.41, 102.96, 89.28, 51.47; HRMS (ESI)  $m/z$ :  $[\text{M}+\text{H}]^+$   $\text{C}_{25}\text{H}_{18}\text{NO}$  Calcd for : 348.1310; found 348.1310.

**4-(1-(hydroxymethyl)cyclopropyl)-3-phenyl-2-naphthonitrile (7):** White solid (28.74mg, 96%) mp 208-

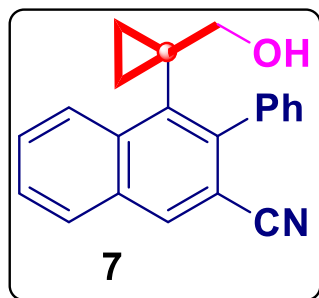

210 °C;  $^1\text{H NMR}$  (597 MHz,  $\text{CDCl}_3$ )  $\delta$  8.66 (dd,  $J = 8.6, 0.7$  Hz, 1H), 8.23 (s, 1H), 7.94 – 7.87 (m, 1H), 7.71 (ddd,  $J = 8.5, 6.9, 1.4$  Hz, 1H), 7.61 (ddd,  $J = 8.0, 6.9, 1.1$  Hz, 1H), 7.55 – 7.38 (m, 4H), 7.34 (d,  $J = 7.4$  Hz, 1H), 3.92 (d,  $J = 11.4$  Hz, 1H), 3.75 (d,  $J = 11.4$  Hz, 1H), 1.47 (s, 1H), 1.28 – 1.21 (m, 1H), 0.85 – 0.78 (m, 1H), 0.51 (dt,  $J = 9.5, 5.9$  Hz, 1H), 0.49 – 0.42 (m, 1H);  $^{13}\text{C NMR}$  (150 MHz,  $\text{CDCl}_3$ )  $\delta$  141.64, 138.61, 137.62, 135.36, 134.42, 132.11, 129.91, 129.47, 129.07, 129.04, 128.16, 128.10, 128.02, 127.04, 126.46, 118.38, 112.30, 70.26, 23.41, 14.04, 12.82; HRMS (ESI)  $m/z$ :  $[\text{M}+\text{H}]^+$   $\text{C}_{21}\text{H}_{18}\text{NO}$  Calcd for : 300.3730; found

300.3730.

**12-hydroxy-11-(2,4,6-trimethoxyphenethyl)chrysen-5-carbonitrile (8):** Brown solid (38.47mg, 83%) mp

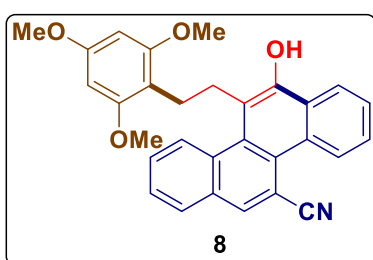

165-167 °C;  $^1\text{H NMR}$  (400 MHz,  $\text{CDCl}_3$ )  $\delta$  9.52 – 9.40 (m, 1H), 8.87 (d,  $J = 8.4$  Hz, 1H), 8.40 (s, 1H), 8.02 – 7.92 (m, 3H), 7.74 – 7.62 (m, 4H), 6.10 (s, 2H), 3.81 (s, 3H), 3.76 (s, 6H), 3.51 (dd,  $J = 9.5, 6.7$  Hz, 2H), 3.19 (dd,  $J = 9.5, 6.7$  Hz, 2H);  $^{13}\text{C NMR}$  (101 MHz,  $\text{CDCl}_3$ )  $\delta$  159.49, 158.72, 138.03, 137.47, 132.17, 132.03, 131.29, 131.09, 130.51, 128.54, 128.25, 128.02, 127.73, 127.51, 127.22, 126.74, 126.01, 125.04, 121.84, 110.03, 106.53, 90.30, 55.62, 55.32, 36.59, 25.40; HRMS (ESI)  $m/z$ :  $[\text{M}+\text{H}]^+$   $\text{C}_{30}\text{H}_{26}\text{O}_4$  Calcd for : 464.5330; found 464.5333.

90.30, 55.62, 55.32, 36.59, 25.40; HRMS (ESI)  $m/z$ :  $[\text{M}+\text{H}]^+$   $\text{C}_{30}\text{H}_{26}\text{O}_4$  Calcd for : 464.5330; found 464.5333.

**methyl 1-(3-cyano-2-phenyl-naphthalen-1-yl)cyclopropane-1-carboxylate (9):**  $^1\text{H NMR}$  (400

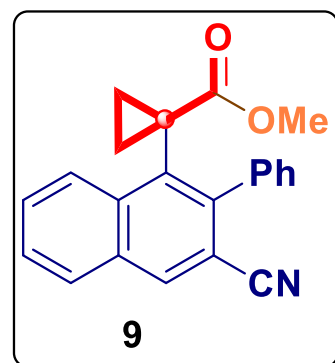

MHz,  $\text{CDCl}_3$ )  $\delta$  8.31 (s, 1H), 8.25 (d,  $J = 8.6$  Hz, 1H), 7.93 (d,  $J = 8.1$  Hz, 1H), 7.71 (ddd,  $J = 8.4, 6.9, 1.3$  Hz, 1H), 7.65 – 7.58 (m, 1H), 7.56 – 7.50 (m, 1H), 7.49 – 7.38 (m, 3H), 7.31 (d,  $J = 6.8$  Hz, 1H), 3.67 (s, 3H), 1.94 (ddd,  $J = 9.9, 7.5, 3.8$  Hz, 1H), 1.23 (ddd,  $J = 9.9, 7.6, 4.9$  Hz, 1H), 1.08 (ddd,  $J = 9.5, 7.6, 3.8$  Hz, 1H), 0.69 (ddd,  $J = 9.5, 7.5, 4.9$  Hz, 1H);  $^{13}\text{C NMR}$  (101 MHz,  $\text{CDCl}_3$ )  $\delta$  175.01, 140.81, 138.10, 135.41, 134.82, 131.80, 129.58, 129.53, 129.04, 128.49, 128.37, 127.04, 125.62, 118.56, 111.58, 52.55, 25.38, 22.32, 20.39; HRMS (ESI)  $m/z$ :  $[\text{M}+\text{H}]^+$   $\text{C}_{22}\text{H}_{17}\text{O}_2$  Calcd for : 327.3830; found 327.3834.

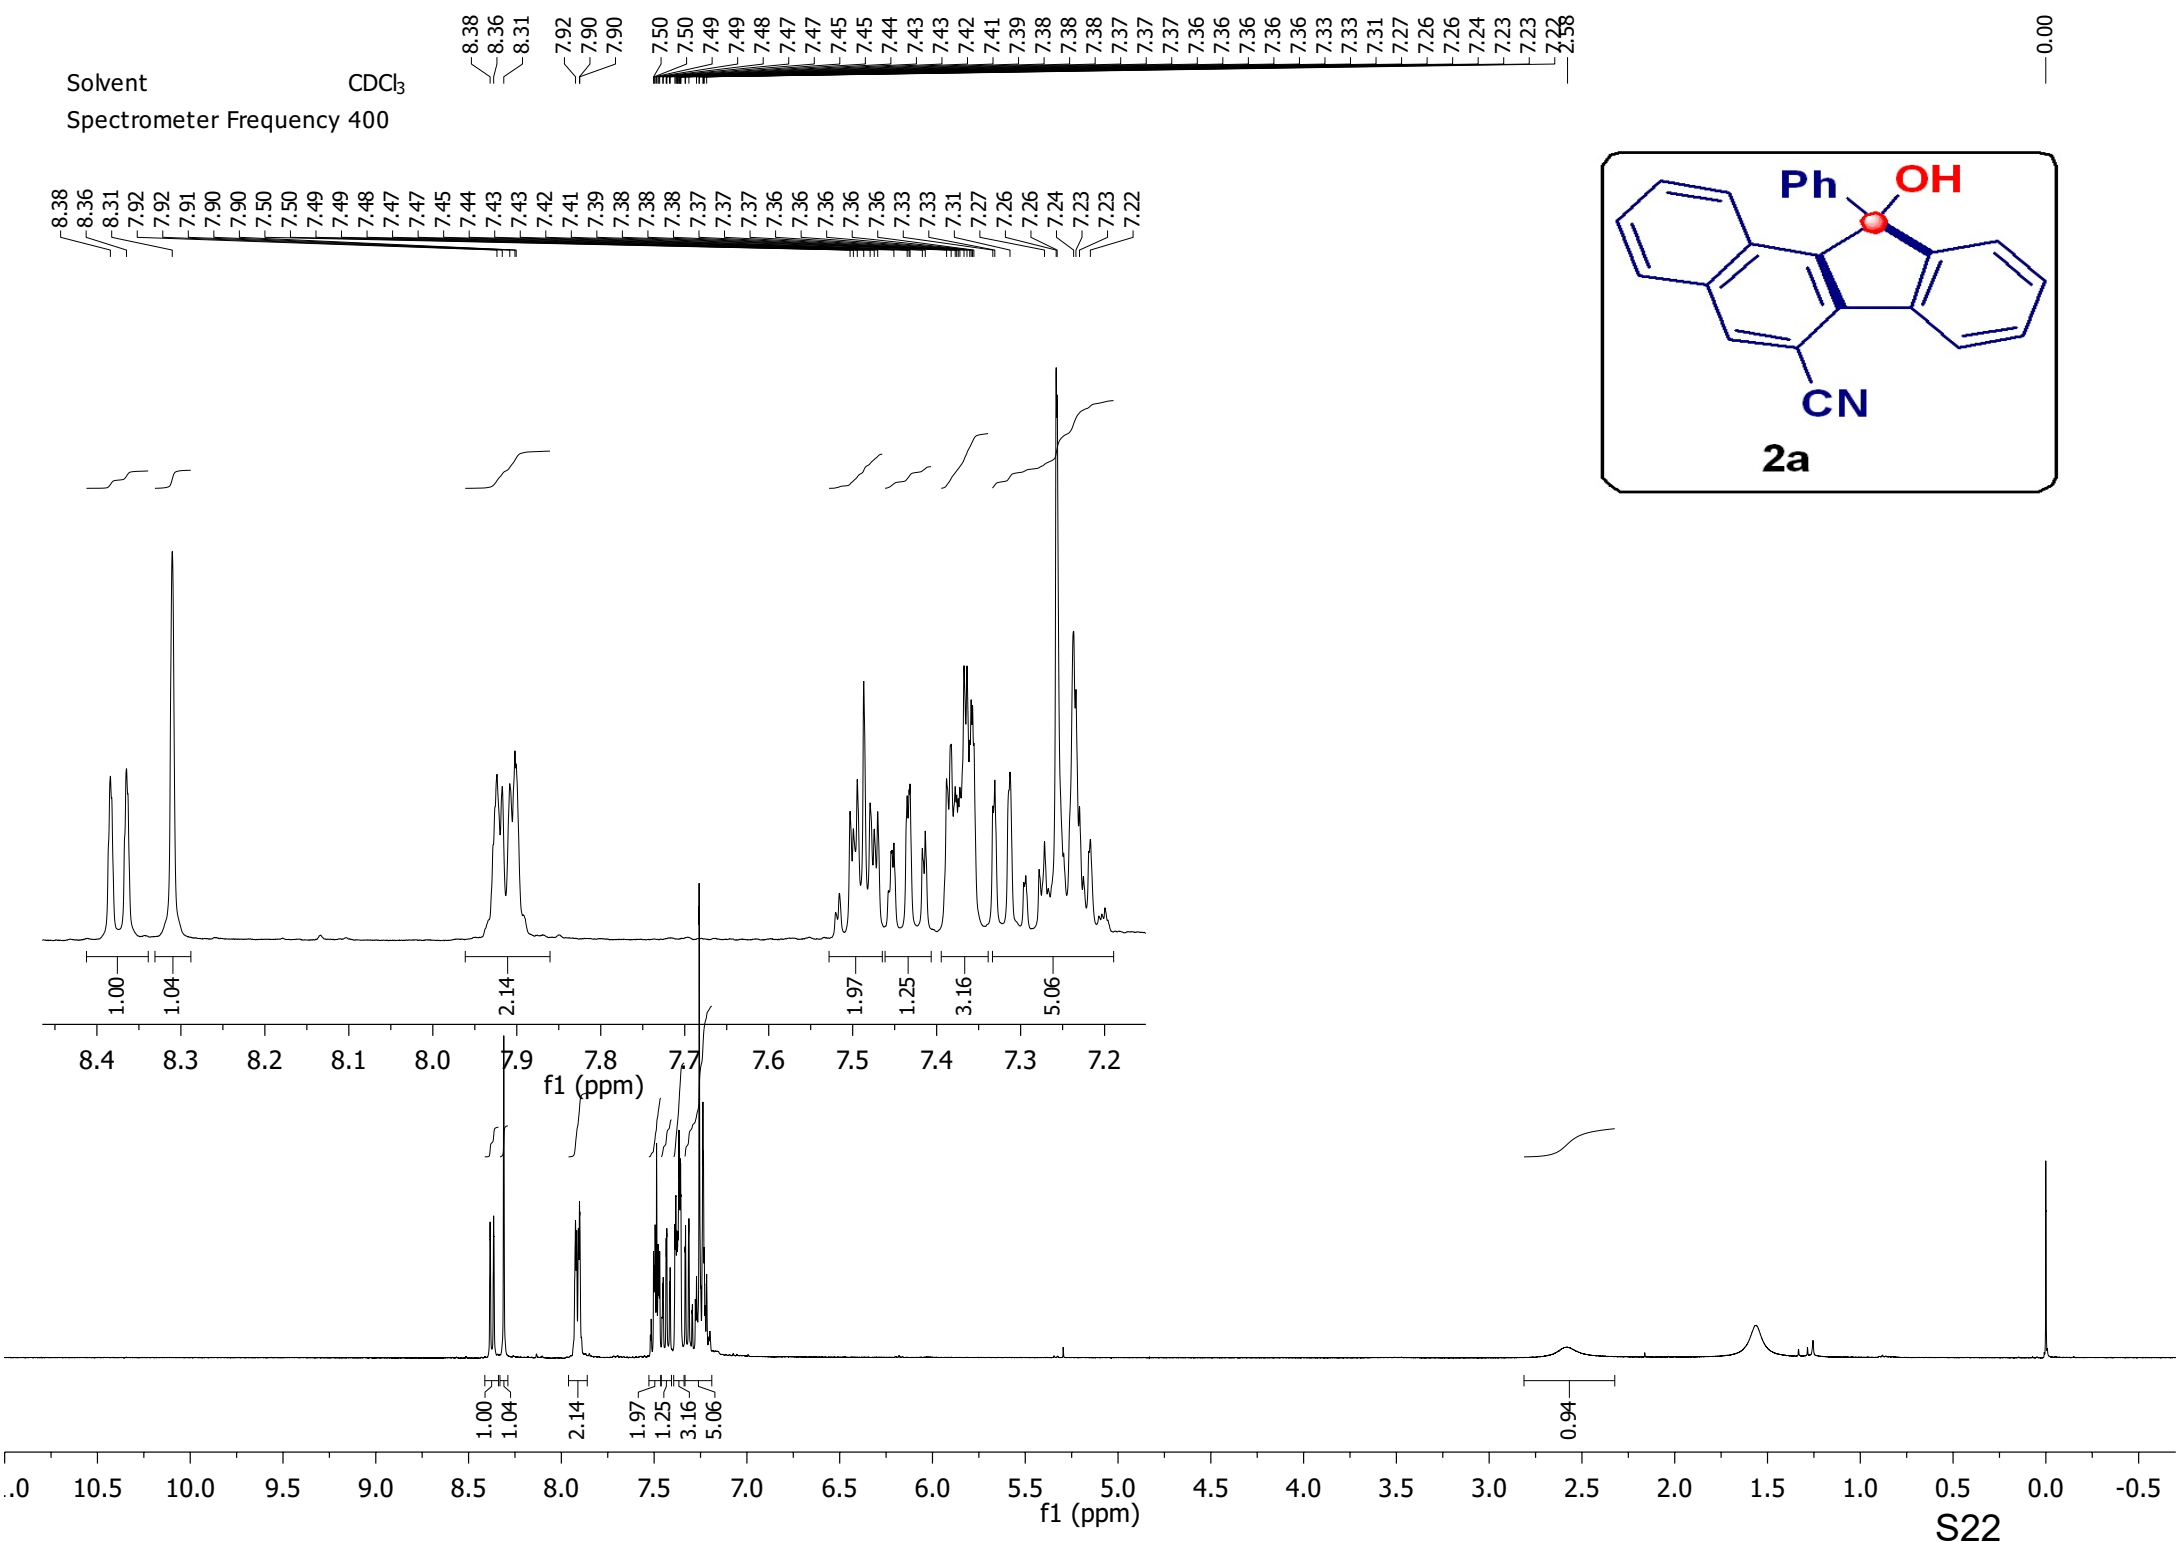

Solvent CDCl<sub>3</sub>  
Spectrometer Frequency 100

151.96  
146.26  
141.76  
137.10  
136.75  
132.66  
130.79  
129.70  
129.52  
129.34  
129.18  
128.56  
127.44  
127.13  
125.17  
124.85  
124.25  
122.01  
118.31  
102.94  
83.67  
77.31  
76.99  
76.68

151.96  
146.26  
141.76  
137.10  
136.75  
129.70  
129.52  
129.34  
129.18  
128.56  
127.44  
127.13  
125.17  
124.85  
124.25  
122.01  
118.31  
102.94  
83.67

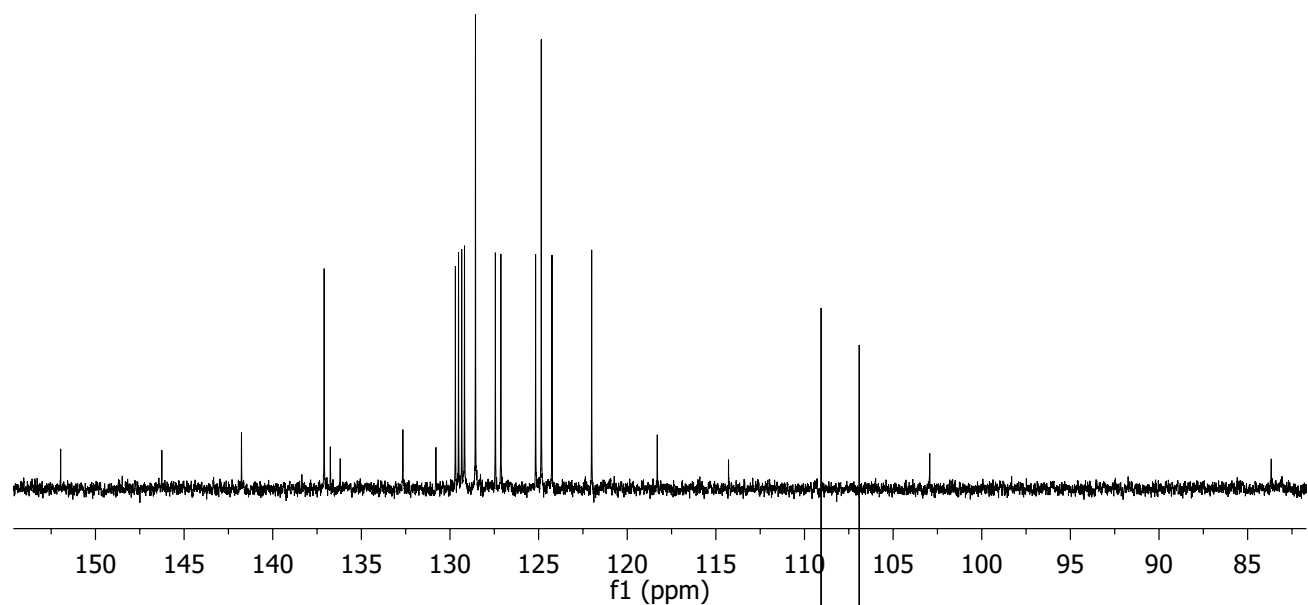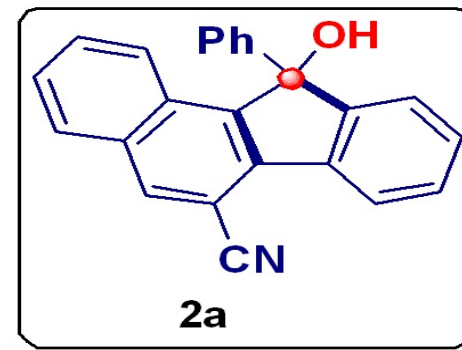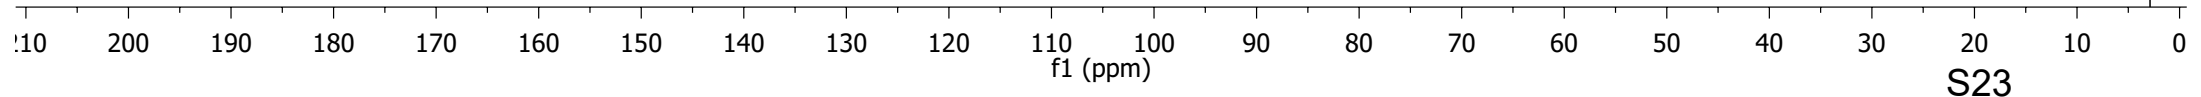

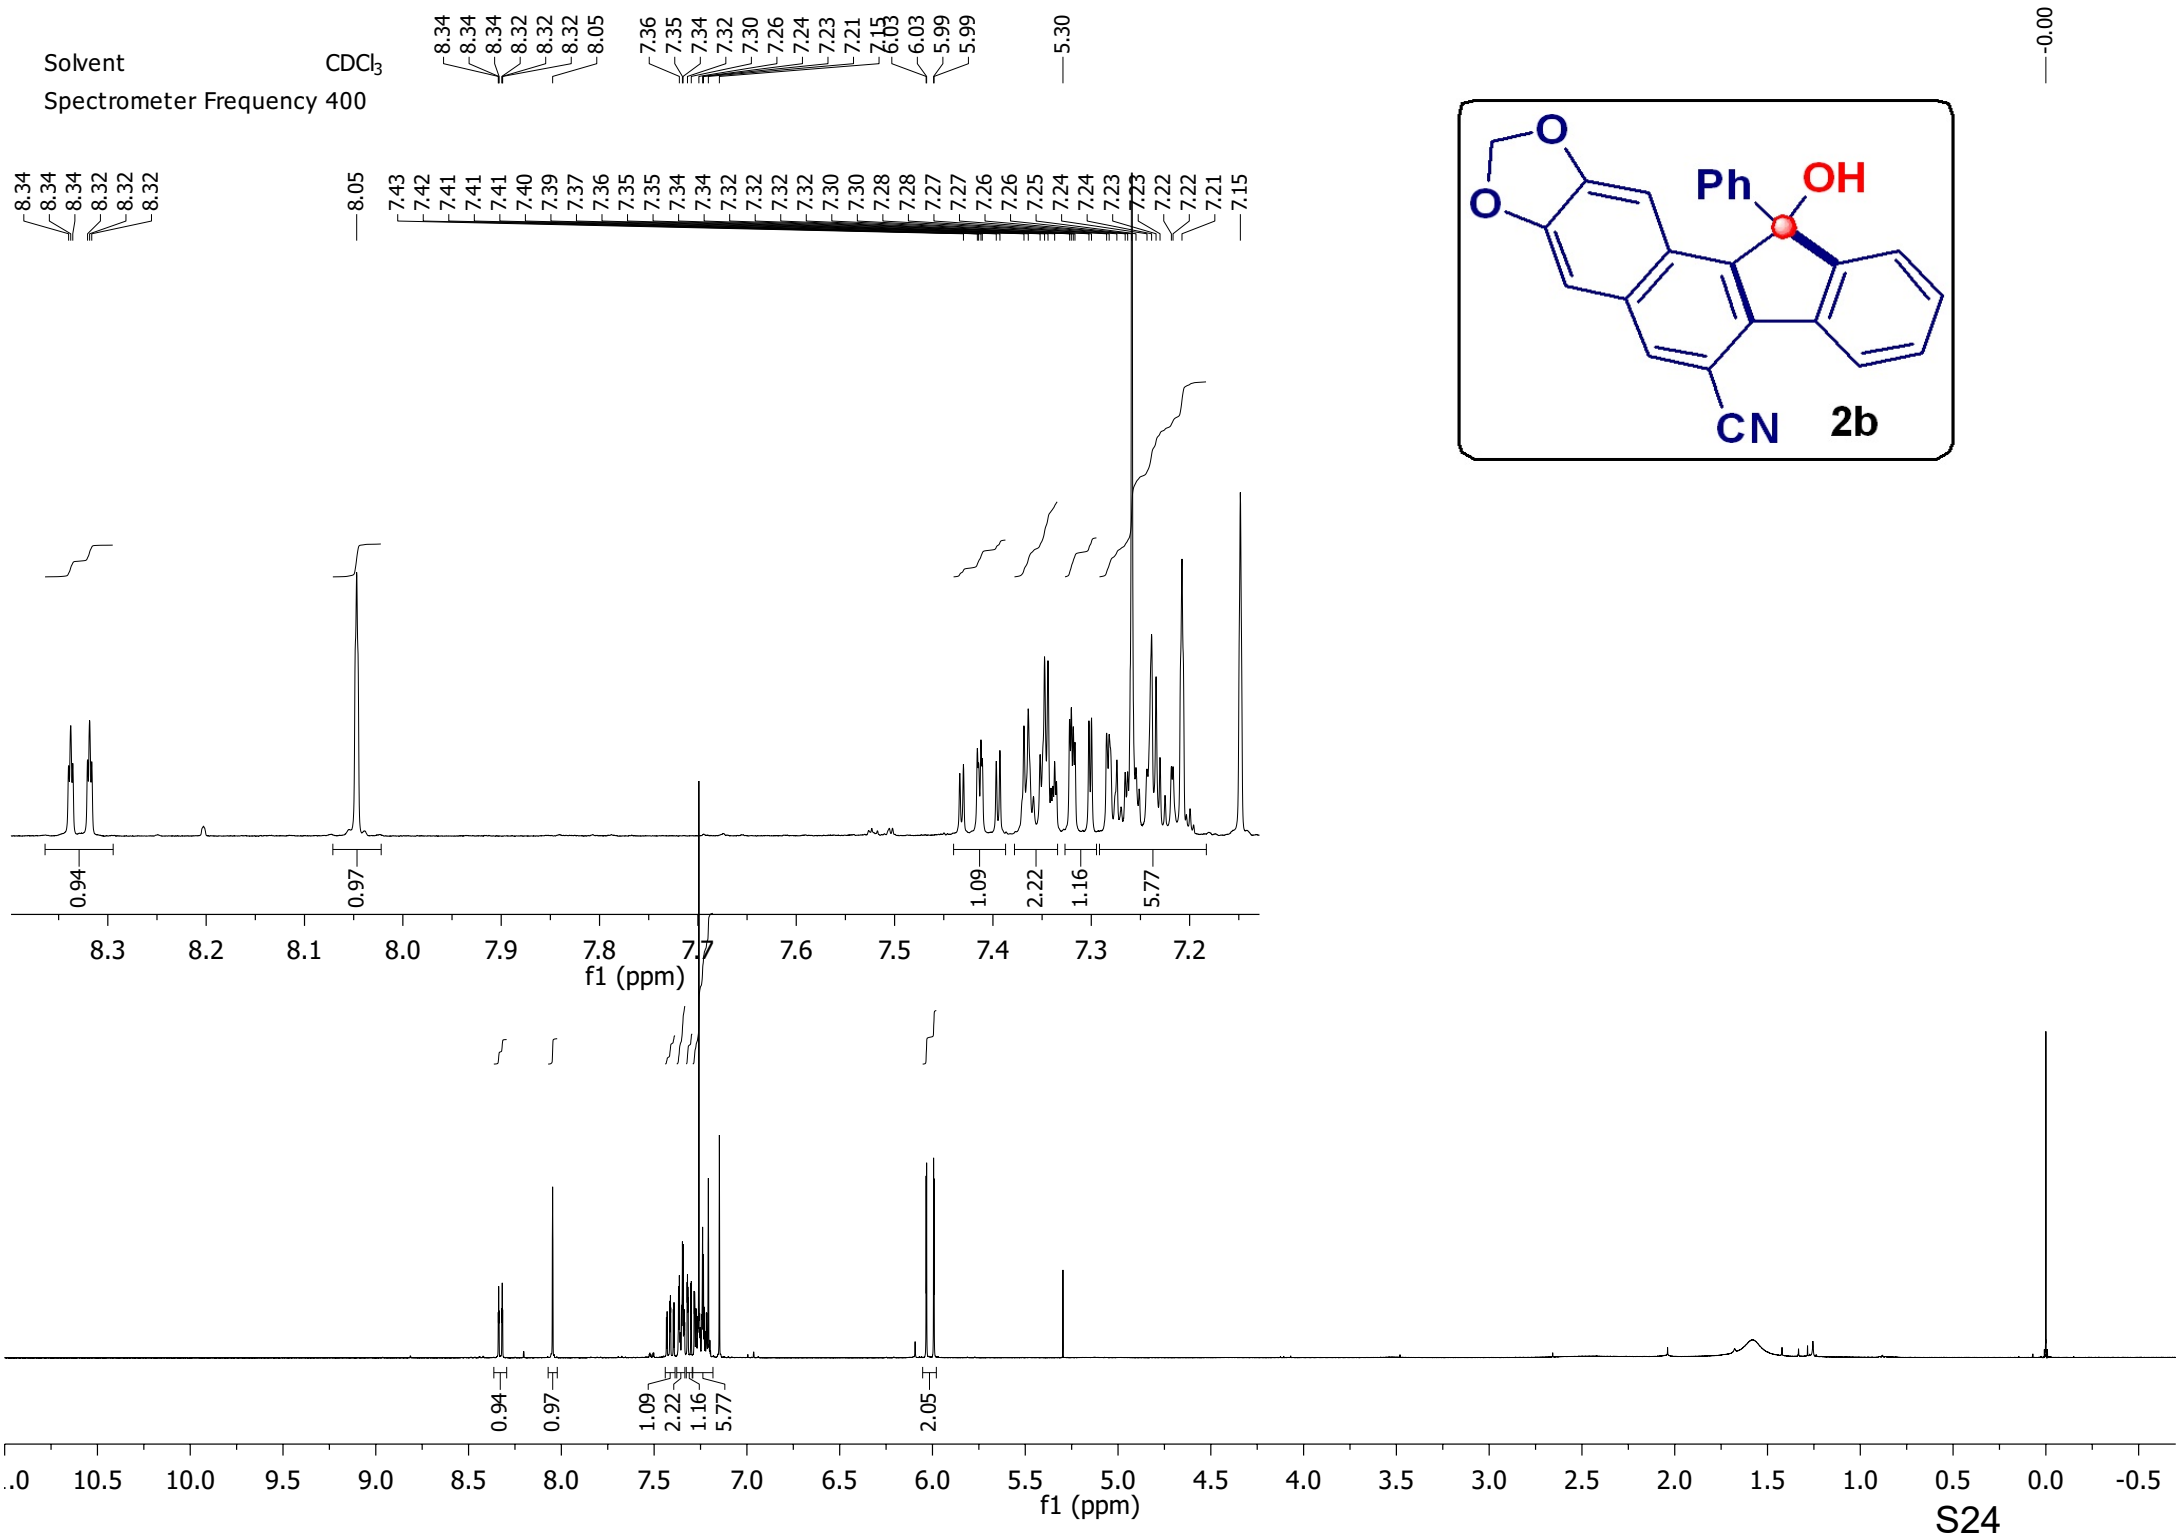



Solvent  $\text{CDCl}_3$   
Spectrometer Frequency 100

151.61  
150.39  
148.62  
145.18  
141.66  
136.82  
135.43  
134.83  
130.26  
129.48  
129.11  
129.07  
128.59  
128.42  
127.42  
124.85  
124.15  
121.85  
118.58

104.69  
101.71  
101.48  
100.97

83.66  
77.31  
77.19  
76.99  
76.67

151.61  
150.39  
148.62  
145.18  
141.66  
136.82  
135.43  
134.83  
130.26  
129.48  
129.11  
129.07  
128.59  
128.42  
127.42  
124.85  
124.15  
121.85  
118.58

104.69  
101.71  
101.48  
100.97

83.66

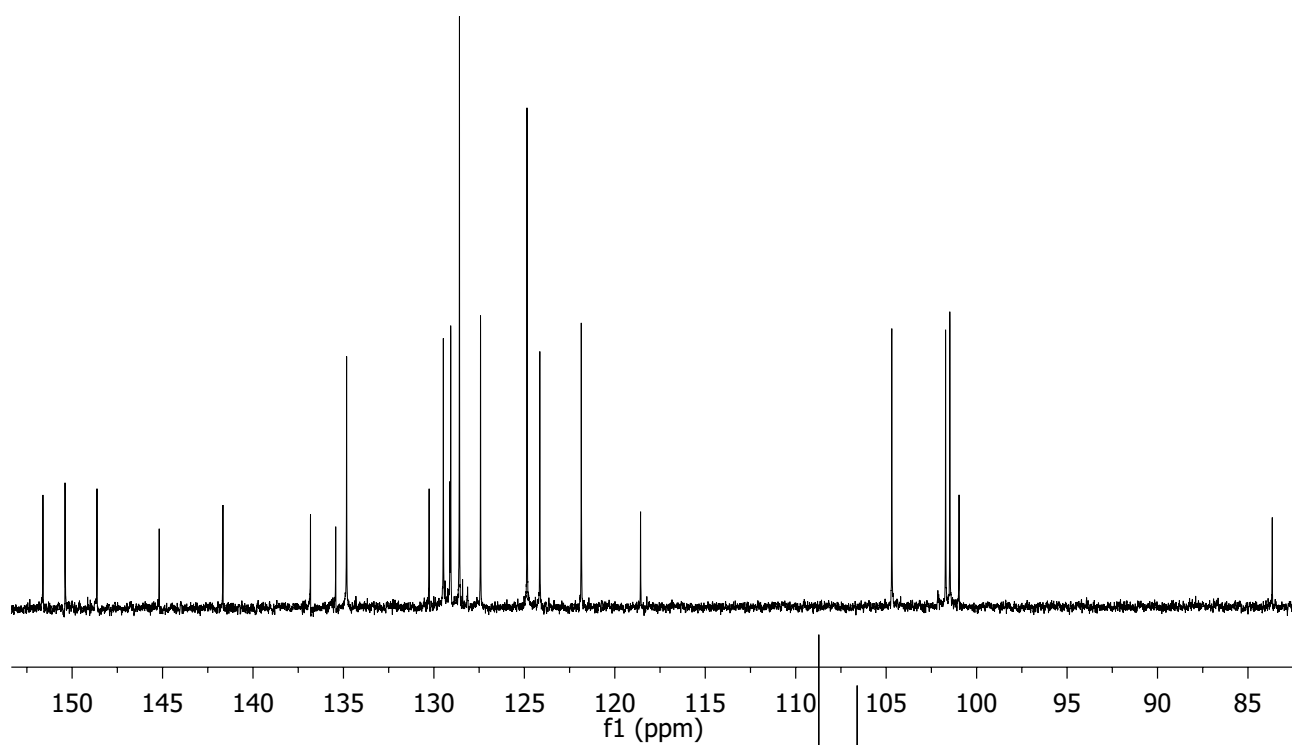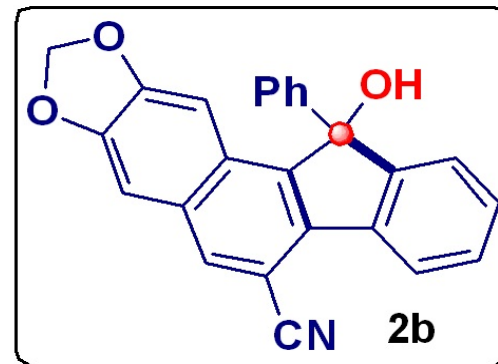

210 200 190 180 170 160 150 140 130 120 110 100 90 80 70 60 50 40 30 20 10 0

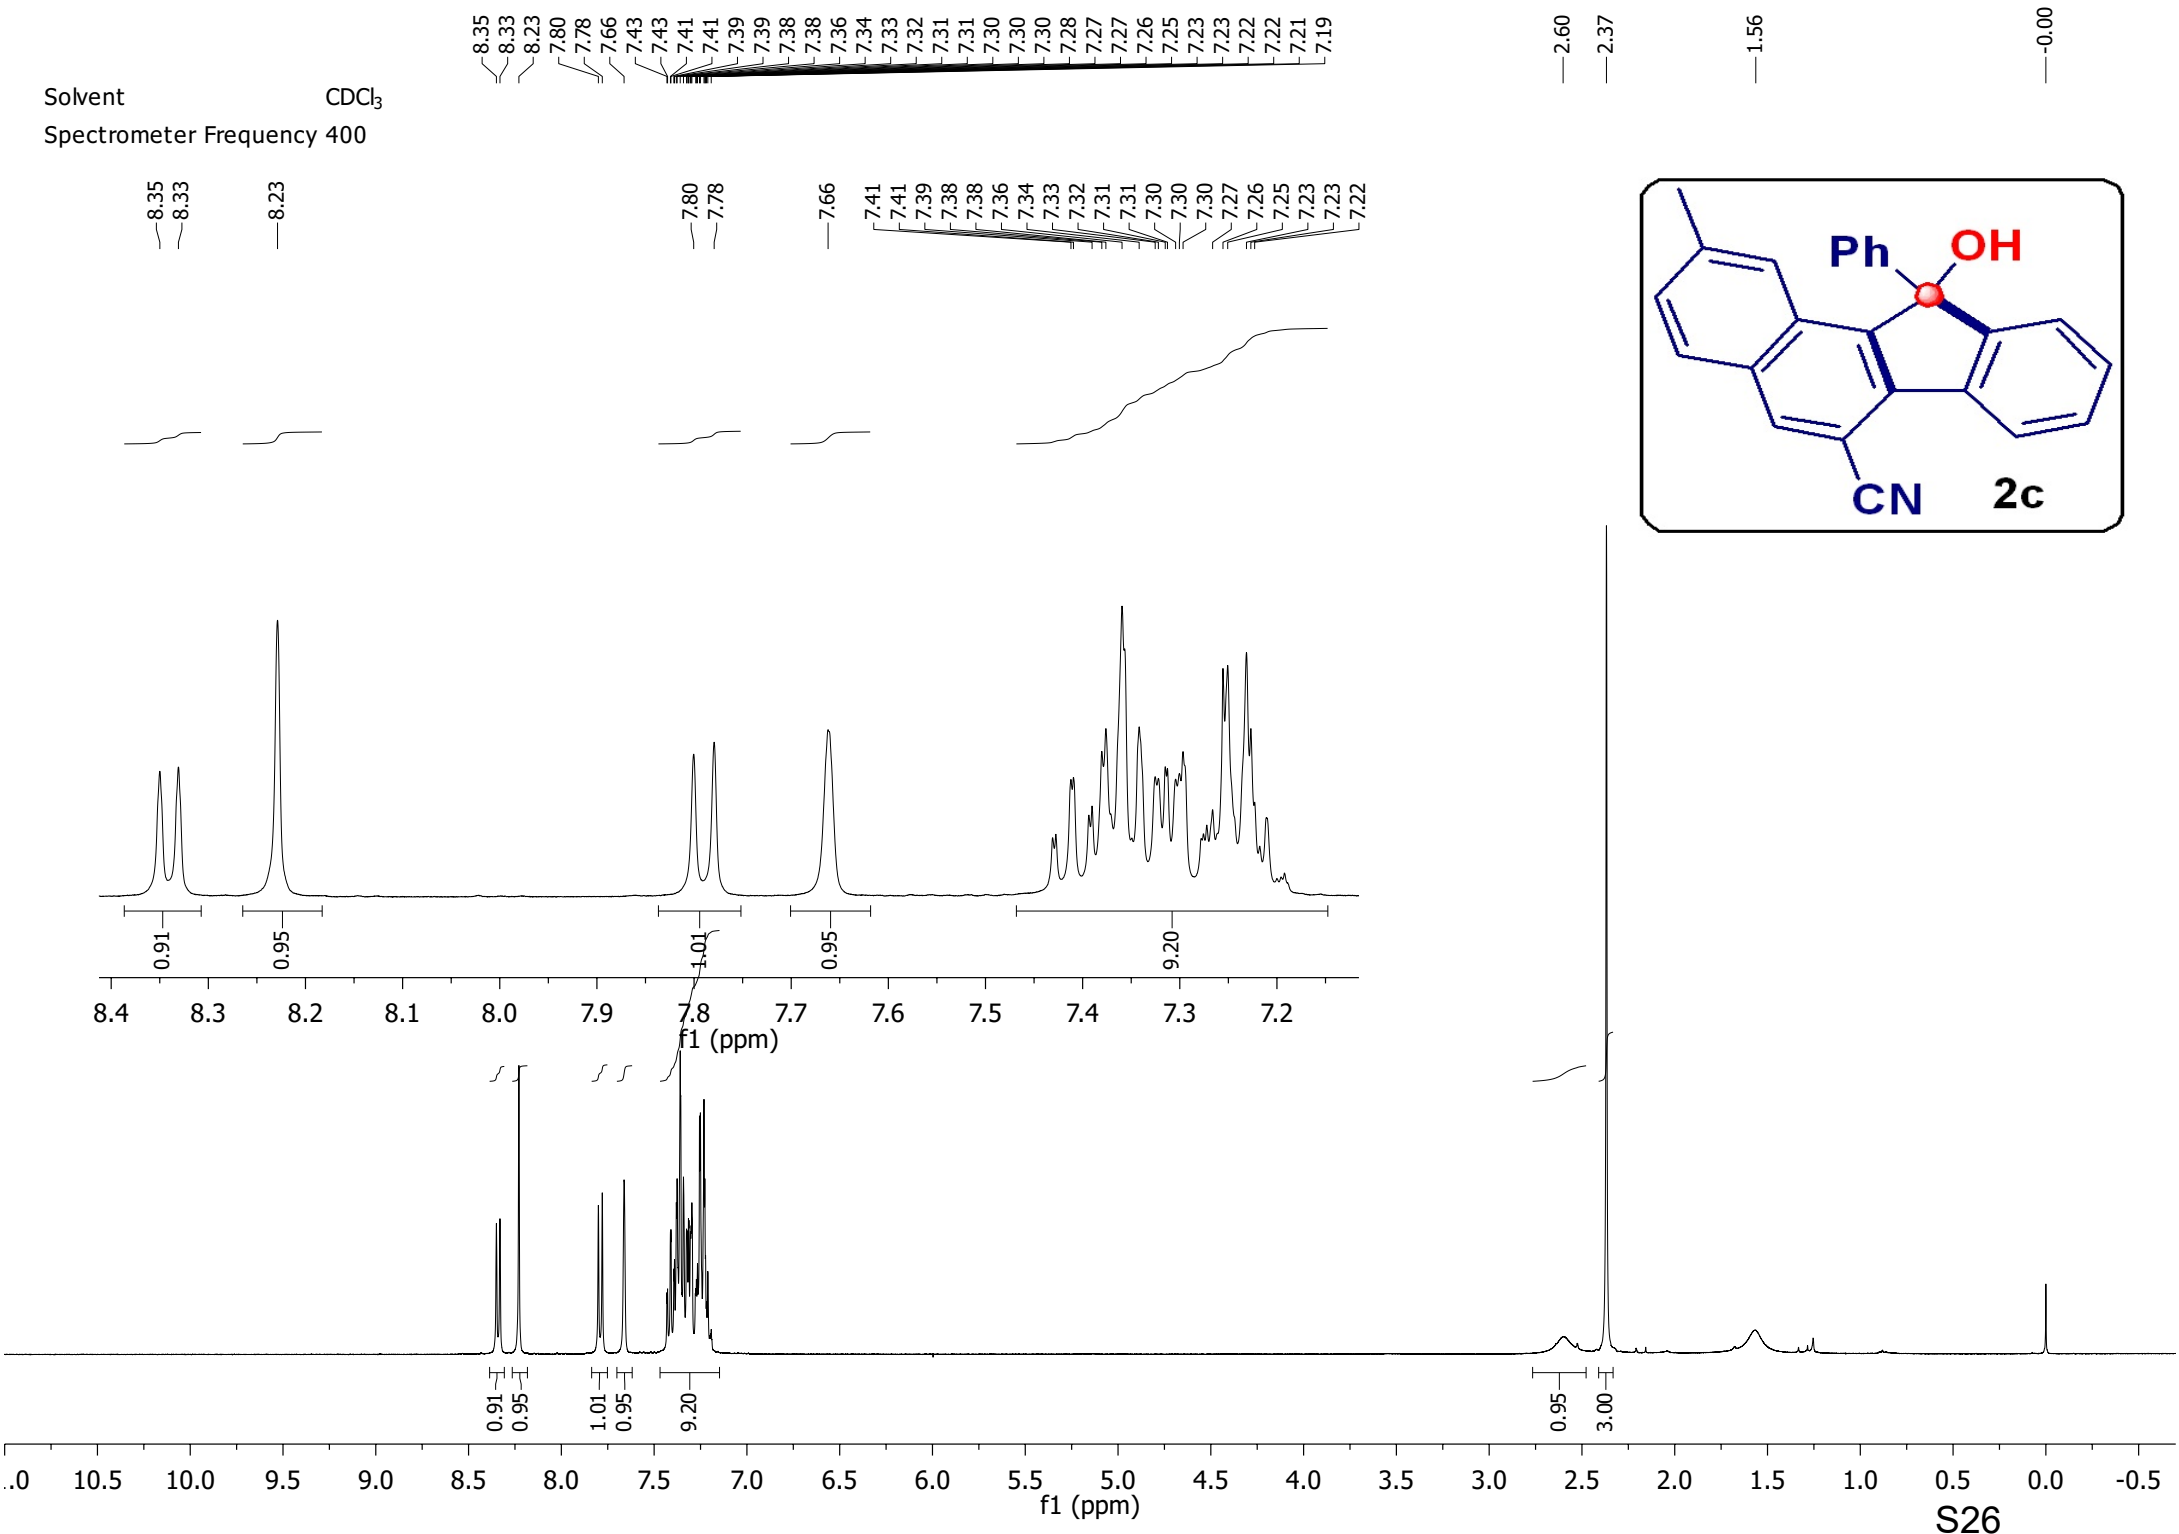

Solvent CDCl<sub>3</sub>  
Spectrometer Frequency 100

152.01  
145.32  
141.78  
140.18  
136.79  
136.24  
131.01  
130.97  
129.52  
129.42  
129.20  
128.97  
128.51  
127.35  
124.82  
124.16  
123.97  
101.83

83.66  
77.31  
76.99  
76.67

22.29

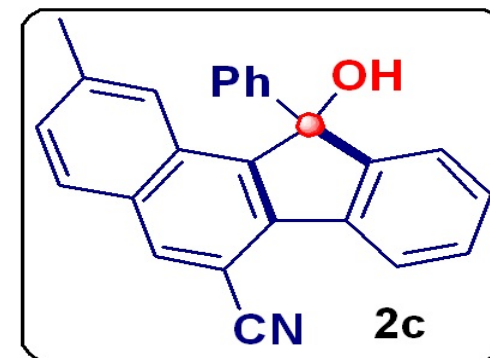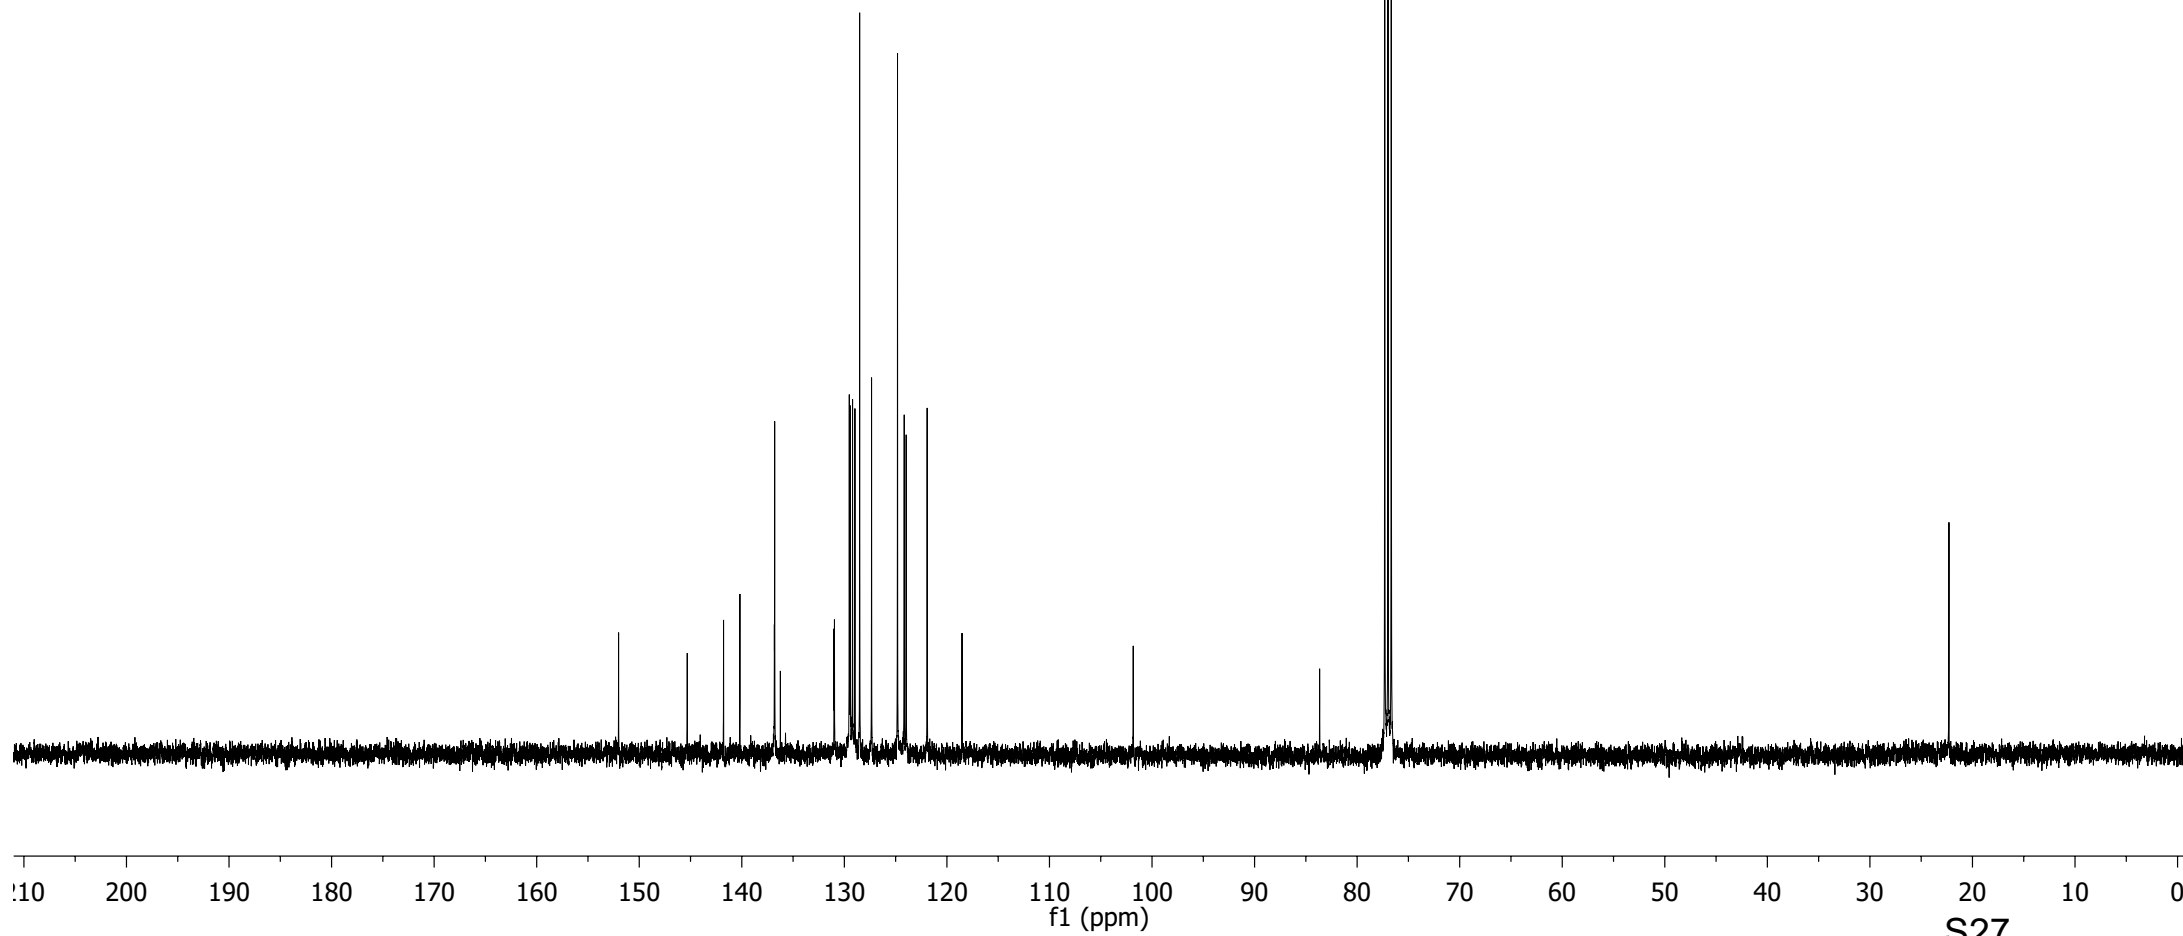

Solvent  $\text{CDCl}_3$   
Spectrometer Frequency 597

8.35 8.34 8.34 8.33 8.32 7.92 7.92 7.91 7.91 7.90 7.90 7.88 7.88 7.88 7.88 7.51 7.50 7.50 7.50 7.49 7.49 7.49 7.48 7.48 7.47 7.37 7.37 7.36 7.36 7.36 7.36 7.29 7.29 7.29 7.29 7.28 7.28 7.27 7.27 7.27 7.26 7.26 7.26 7.26 7.25 7.25 7.25 7.25 7.14 7.13 7.13 7.12 7.12 7.12 7.11 7.10 7.10 7.07 7.07 7.06 7.06 7.06

-0.00

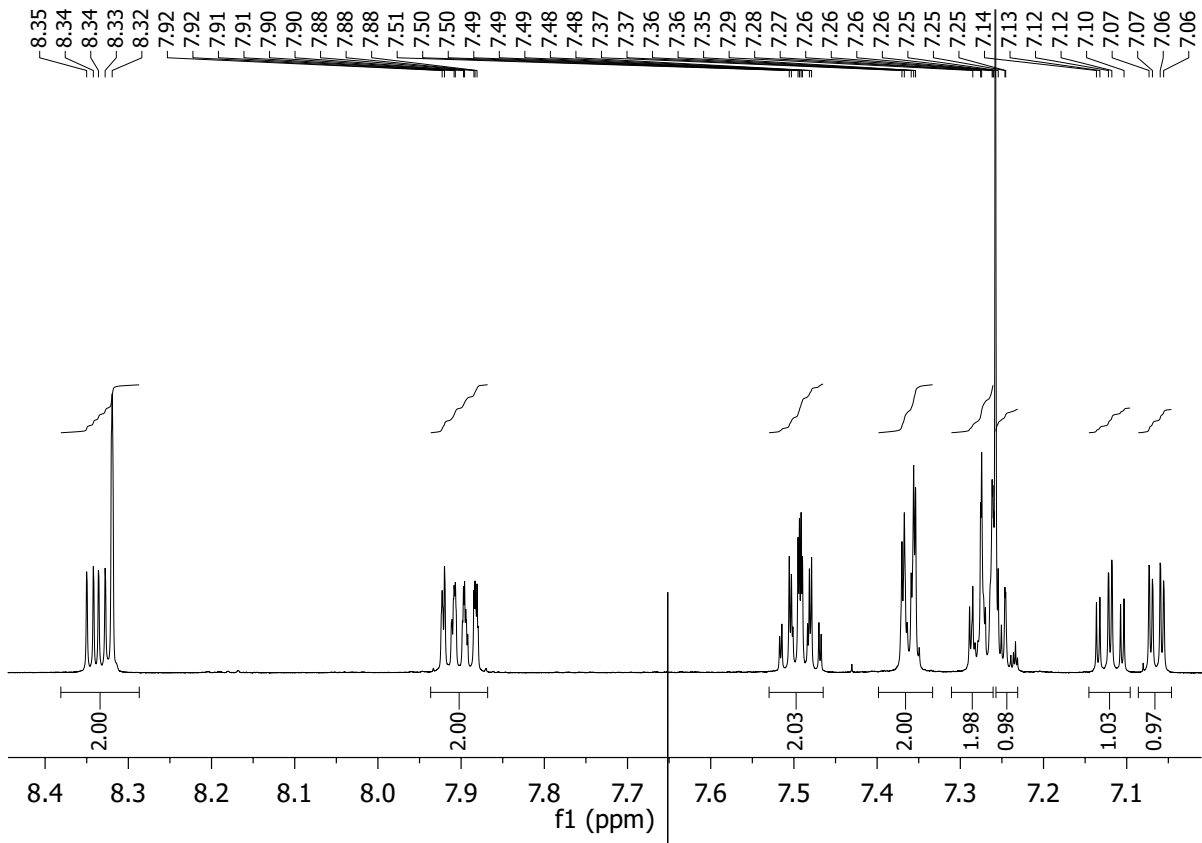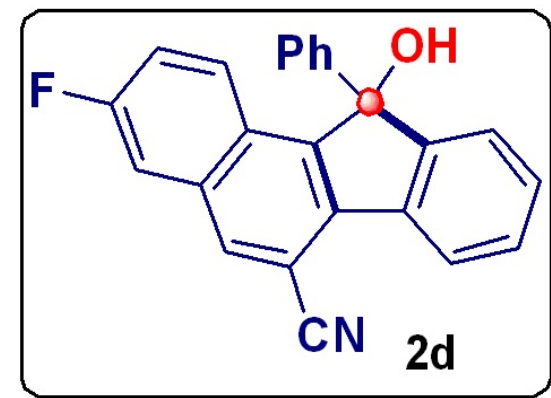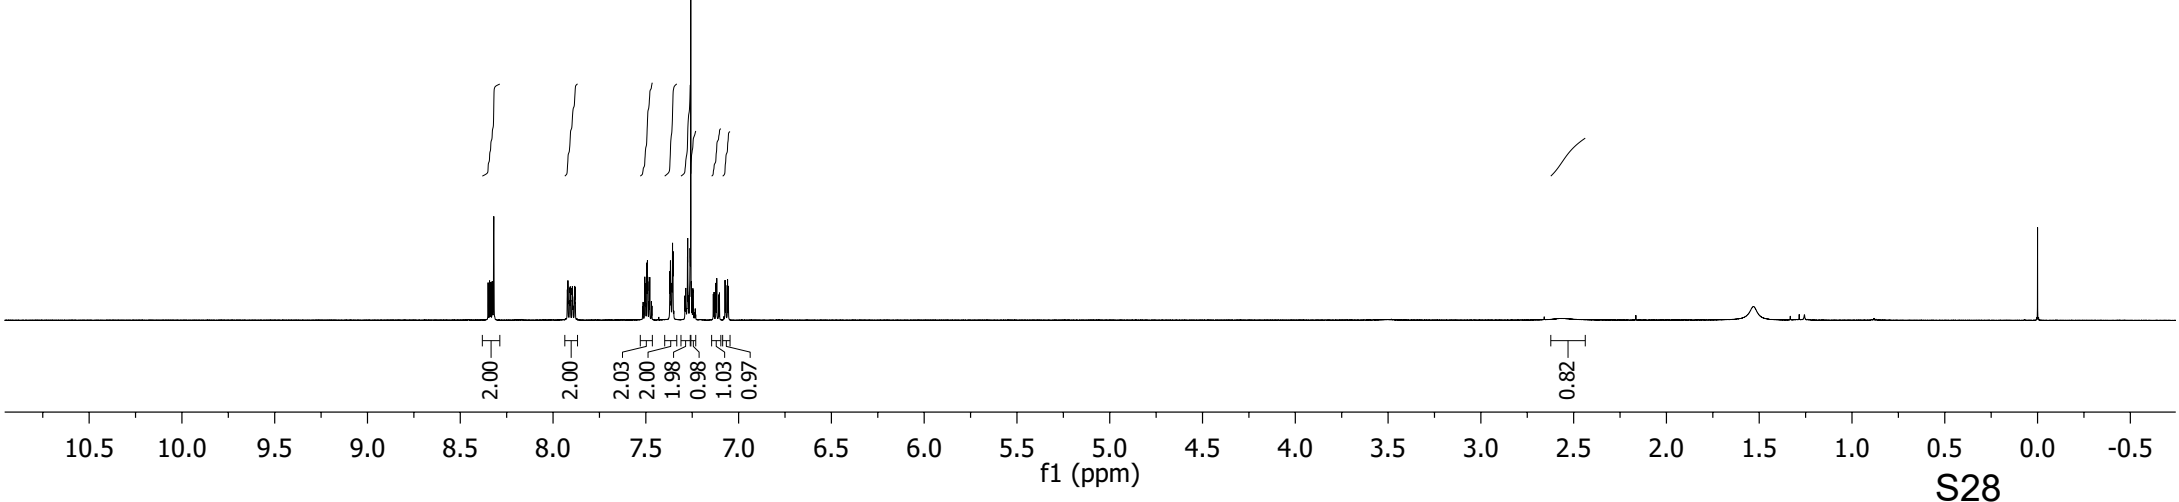

S28

Solvent  $\text{CDCl}_3$   
Spectrometer Frequency 150

164.48  
162.81  
141.12  
137.18  
135.54  
132.43  
130.78  
129.86  
129.23  
128.72  
127.74  
127.18  
124.98  
124.78  
123.43  
123.37  
118.19  
116.50  
116.35  
112.28  
112.12  
102.70  
77.20  
76.99  
76.78

164.48  
162.81  
141.12  
137.18  
135.54  
132.43  
130.78  
129.86  
129.23  
128.72  
127.74  
127.18  
124.98  
124.78  
123.43  
123.37  
118.19  
116.50  
116.35  
112.28  
112.12  
102.70

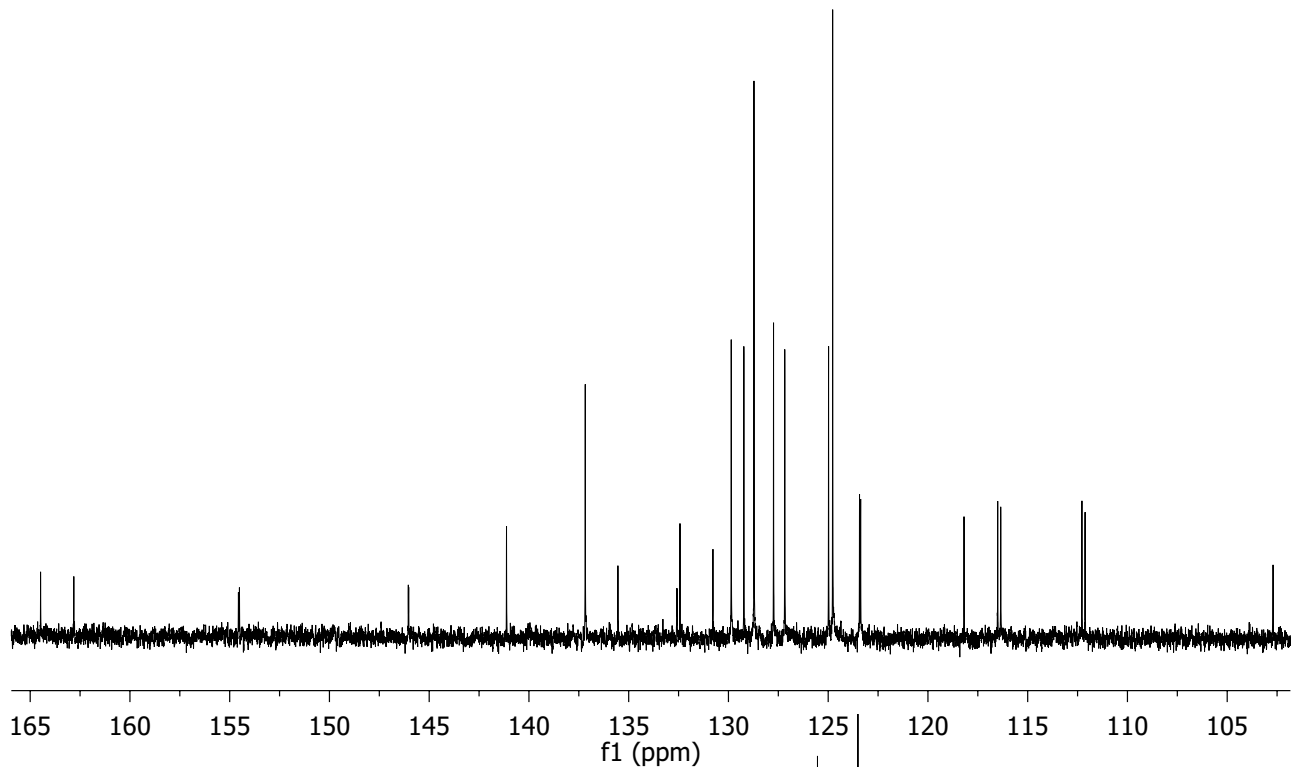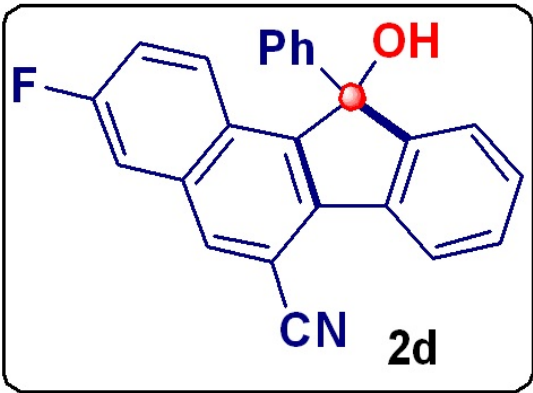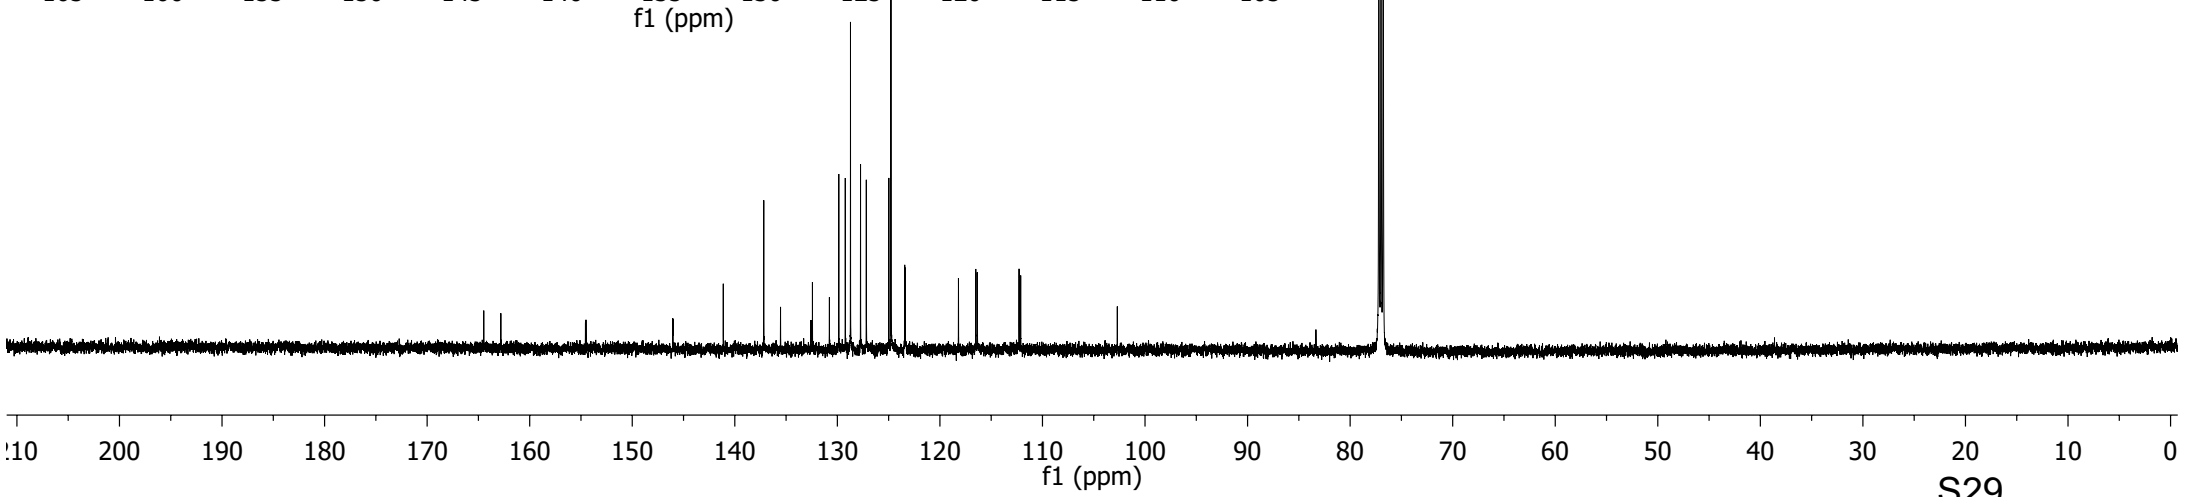

Solvent  
Spectrometer Frequency 597

CDCl<sub>3</sub>  
8.40 8.40 8.40 8.39 8.38 8.38 8.23  
7.90 7.90 7.89 7.88  
7.47 7.46 7.45 7.44 7.44 7.42 7.42 7.40 7.40 7.38 7.37 7.37 7.36 7.36 7.36 7.36 7.35 7.34 7.34 7.34 7.33 7.33 7.33 7.27 7.27 7.27 7.26 7.25 7.24 7.24 7.24 7.23

0.00

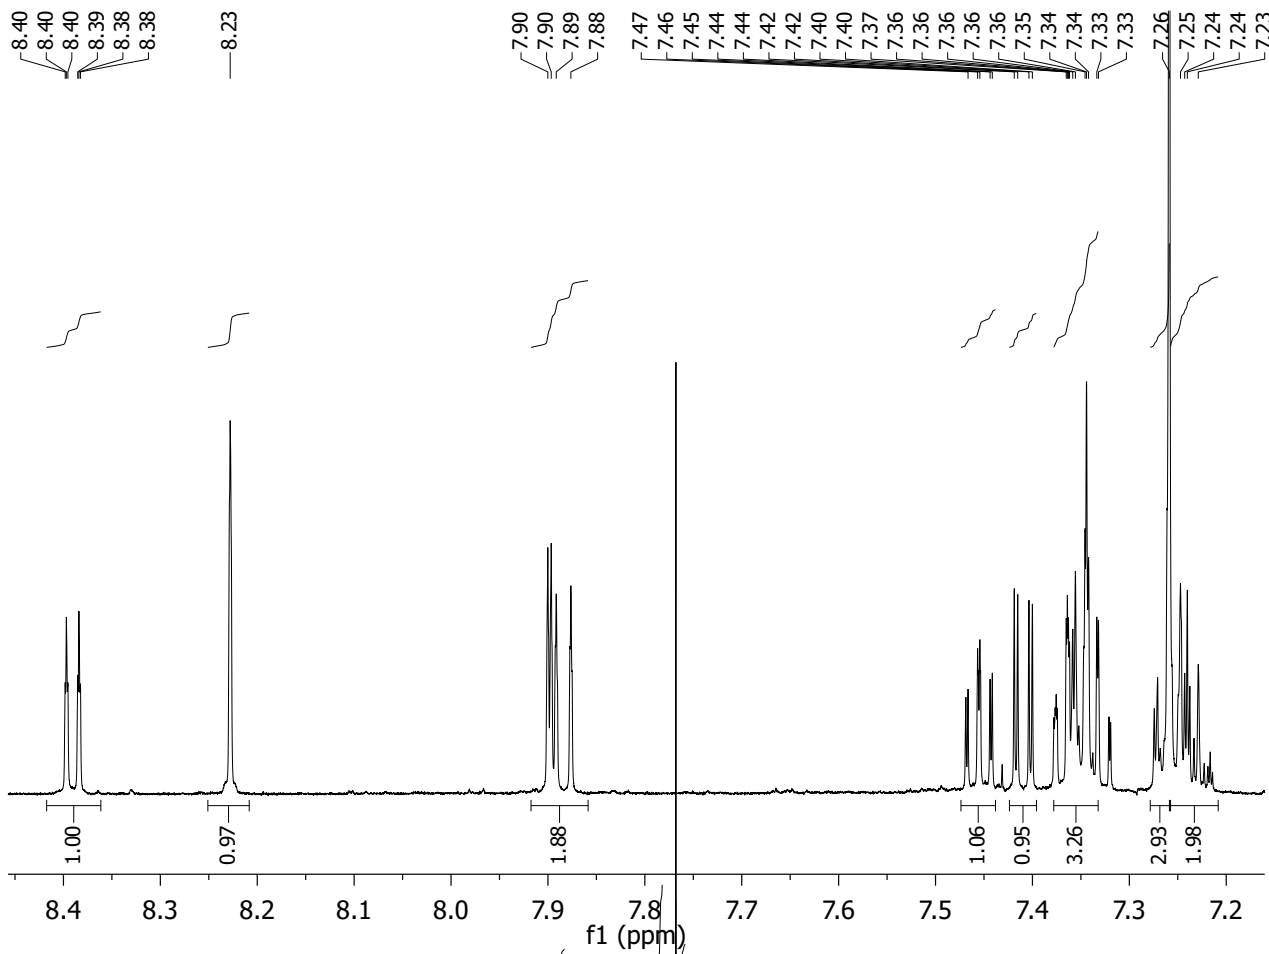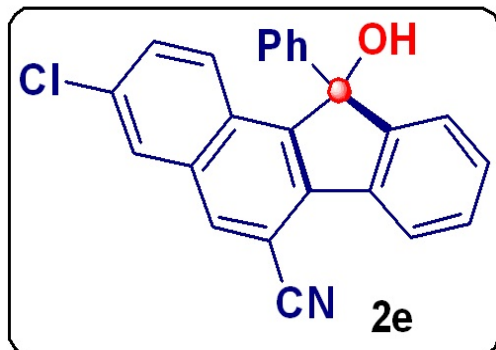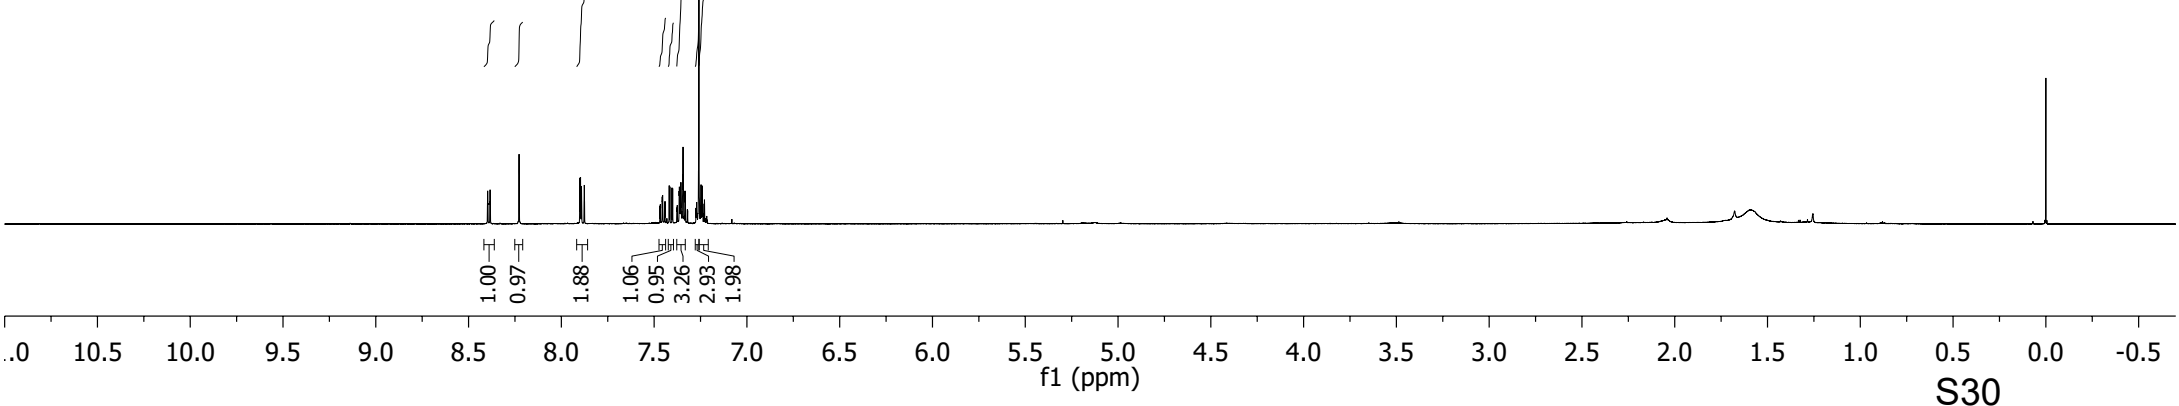

Solvent  $\text{CDCl}_3$   
Spectrometer Frequency 150

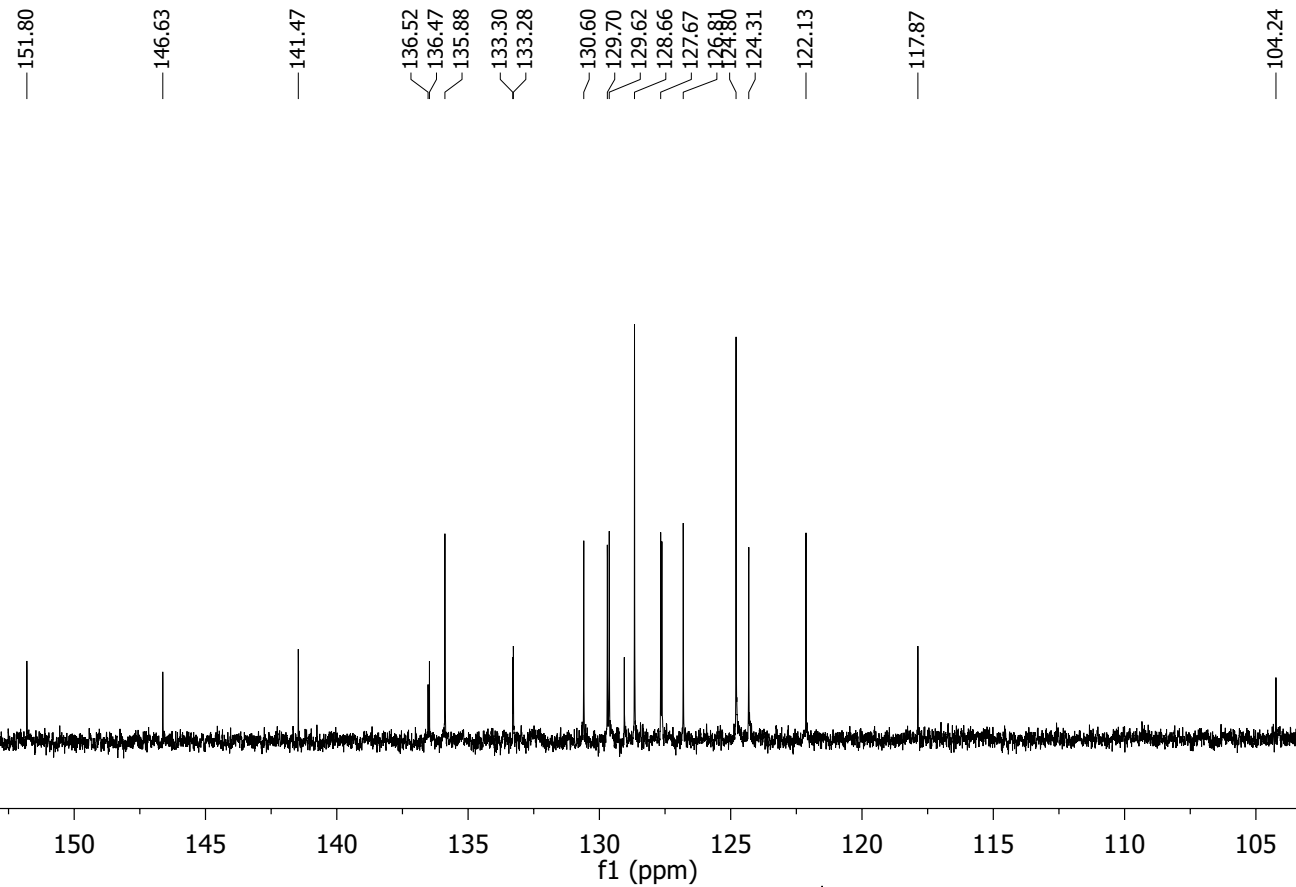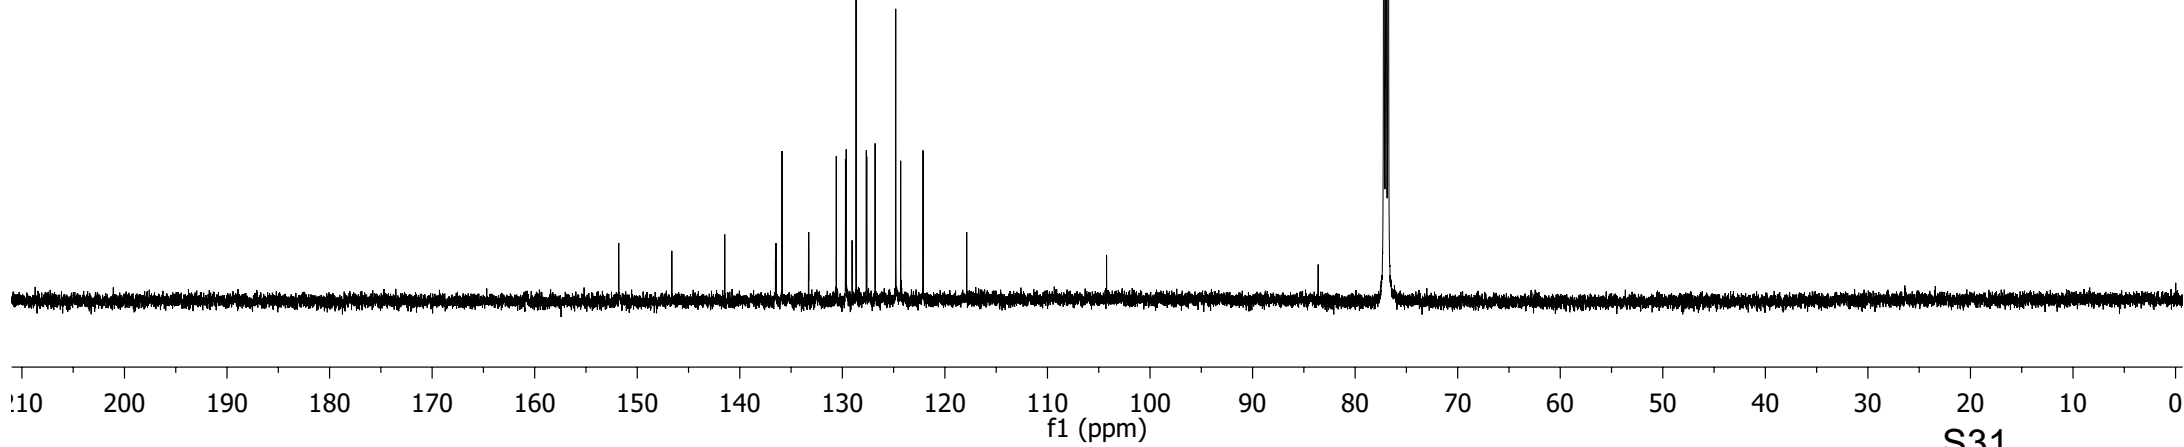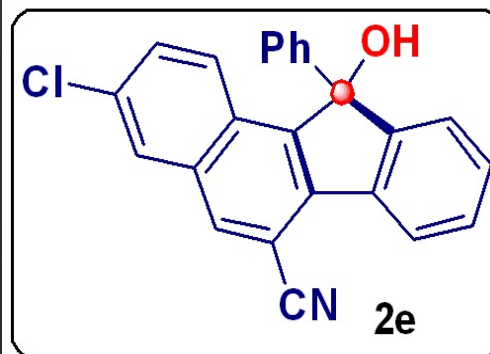

Solvent  $\text{CDCl}_3$   
Spectrometer Frequency 400

8.281  
8.272  
8.261  
7.896  
7.887  
7.878  
7.874  
7.474  
7.471  
7.466  
7.457  
7.454  
7.447  
7.442  
7.391  
7.387  
7.379  
7.375  
7.370  
7.367  
7.274  
7.269  
7.255  
7.253  
7.234  
7.227  
7.223  
7.211

8.281  
8.272  
8.261

7.910  
7.908  
7.896  
7.887  
7.873

7.479  
7.474  
7.471  
7.466  
7.457  
7.454  
7.447  
7.442  
7.391  
7.387  
7.379  
7.375  
7.370  
7.367  
7.255  
7.253  
7.234  
7.227  
7.211

2.564

1.552

1.293

0.000

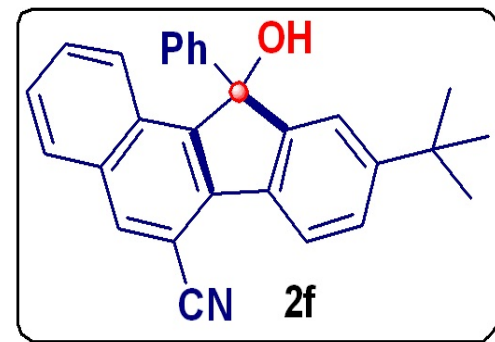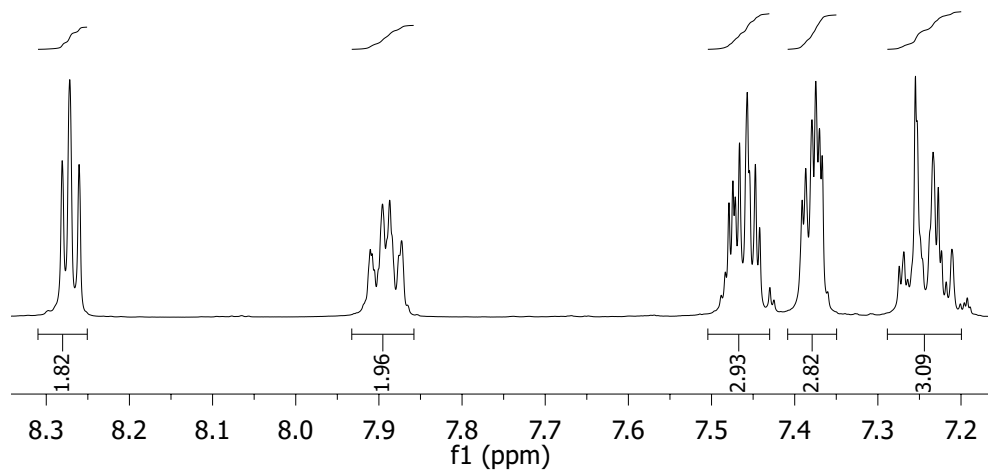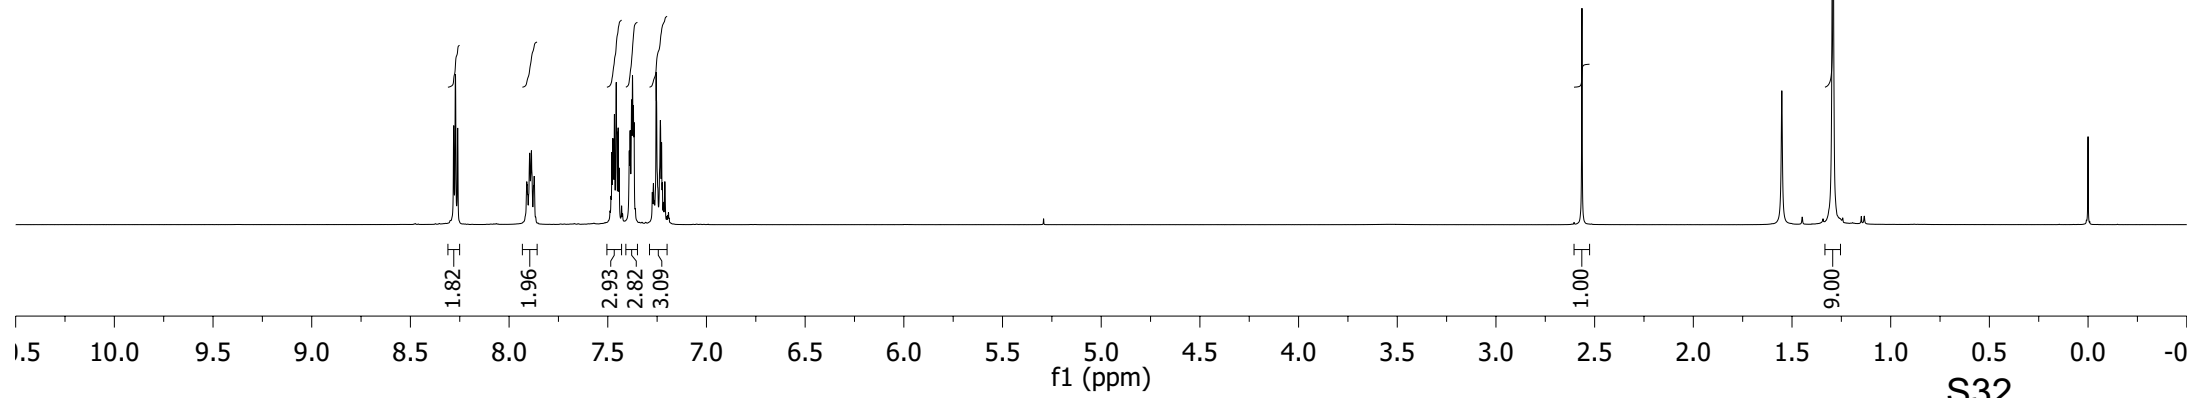



Solvent  $\text{CDCl}_3$   
Spectrometer Frequency 100

153.11  
152.00  
146.28  
141.96  
136.90  
136.35  
134.16  
132.44  
130.82  
129.57  
129.17  
128.49  
127.30  
126.86  
126.63  
125.04  
124.92  
121.54  
121.08  
118.35  
102.78

83.79  
77.31  
76.99  
76.67

35.11  
31.30

153.11  
152.00

146.28

141.96

136.90  
136.35

134.16  
132.44

130.82  
129.57

129.17  
128.49

127.30  
126.86

126.63  
125.04

124.92  
121.54

121.08  
118.35

102.78

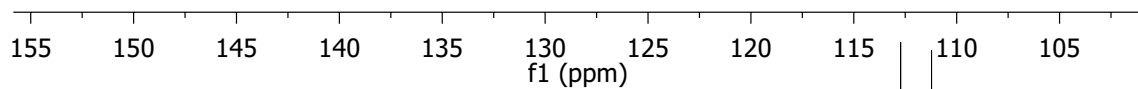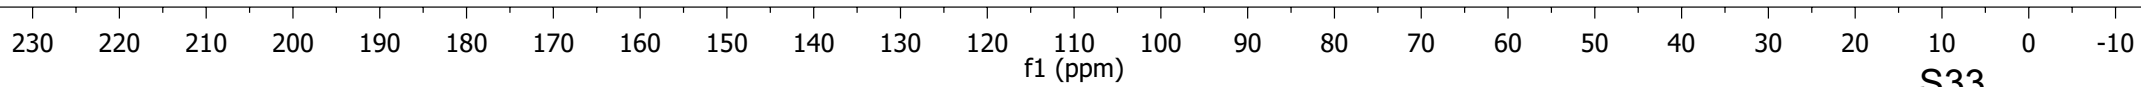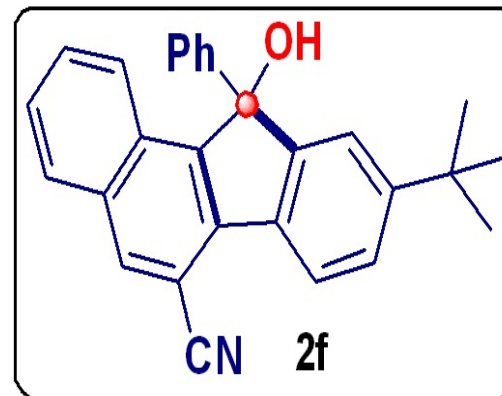

Solvent  $\text{CDCl}_3$   
Spectrometer Frequency 400

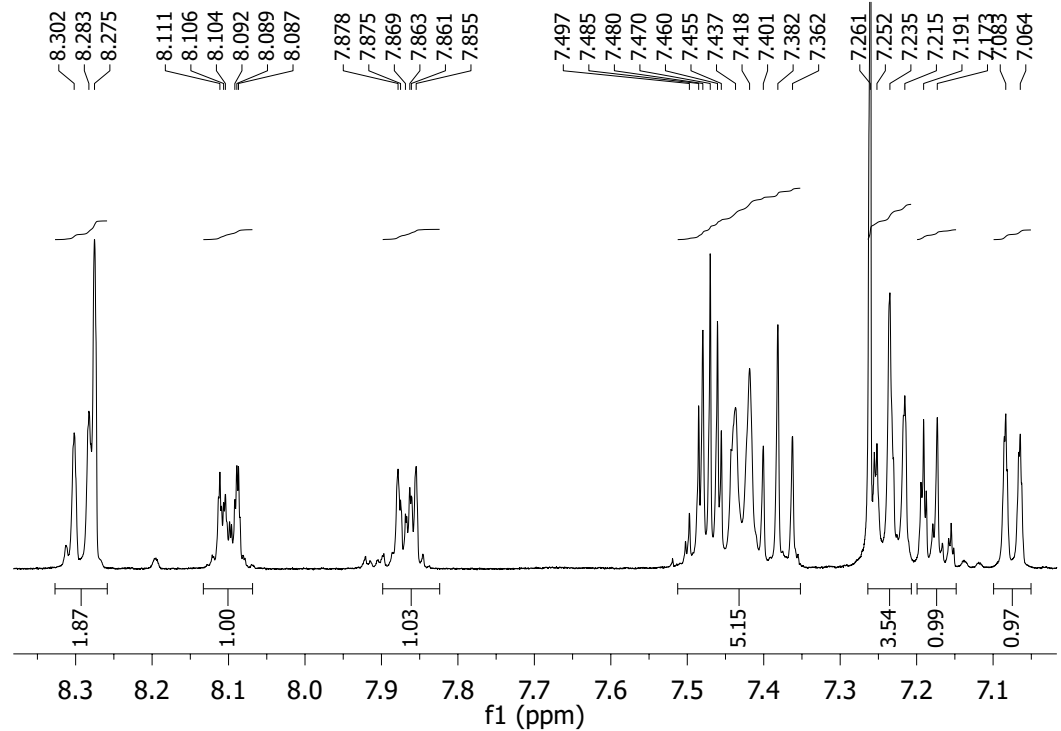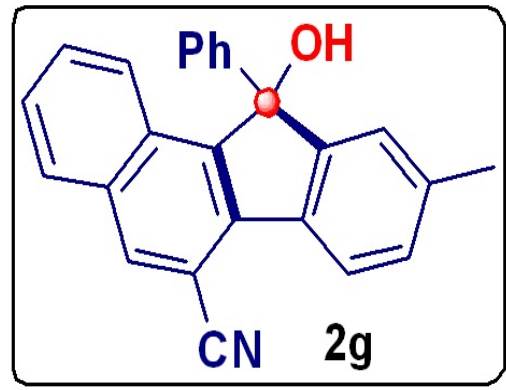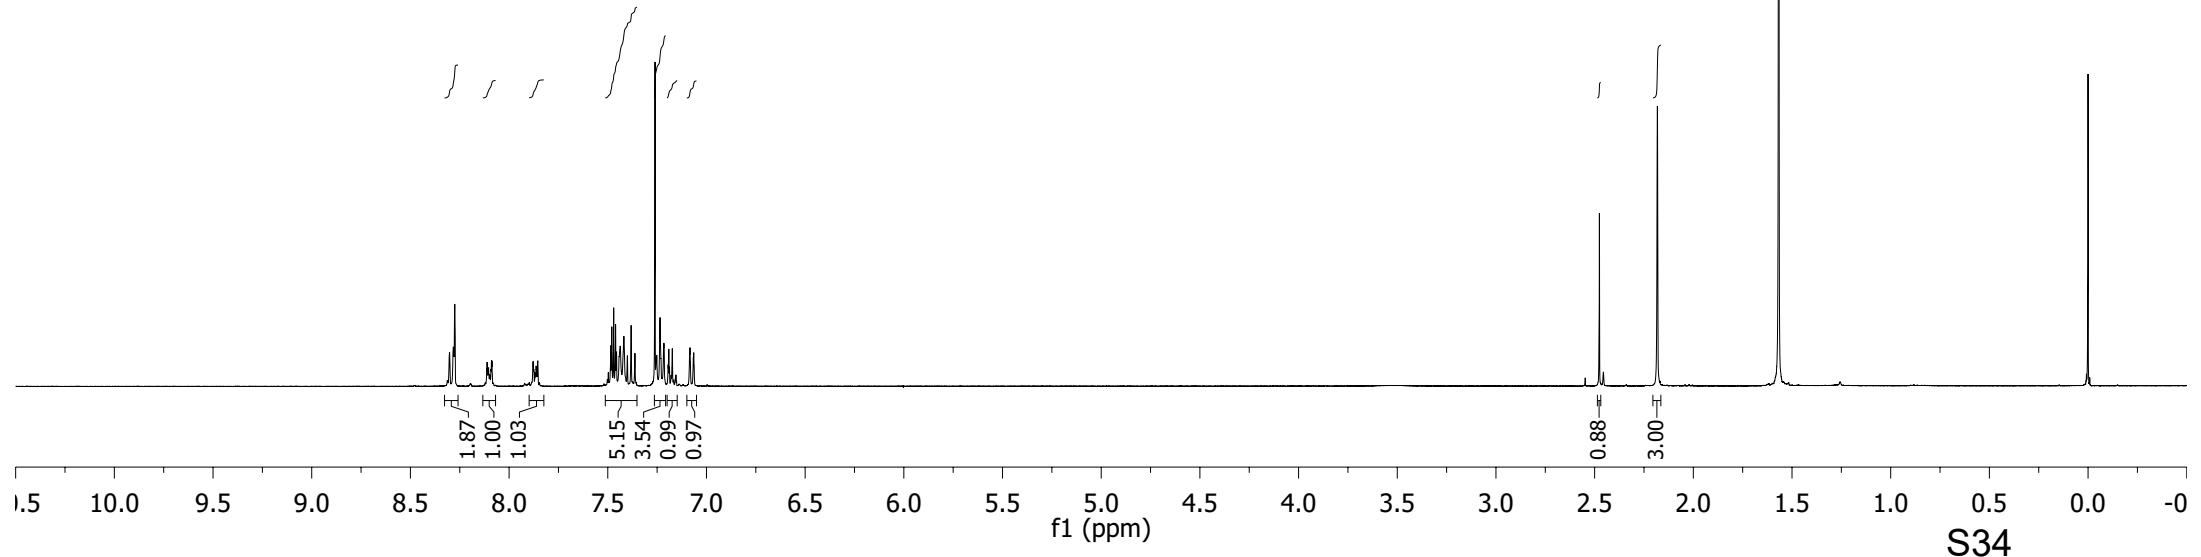

Solvent  $\text{CDCl}_3$   
Spectrometer Frequency 100

—148.98 —146.95 —140.28 —137.43 —137.16 —135.68 —135.55 —132.59 —131.63 —129.78 —130.46 —129.78 —129.61 —129.14 —128.13 —126.93 —125.63 —128.13 —119.42 —118.46 —102.85 —84.65 —77.31 —76.99 —76.67 —17.51

—148.98 —146.95

—140.28

—137.43 —137.16

—135.68 —135.55

—132.59 —131.63

—129.78 —130.46

—129.78 —129.61

—129.14 —128.13

—126.93 —125.63

—128.13 —119.42

—118.46

—119.42 —118.46

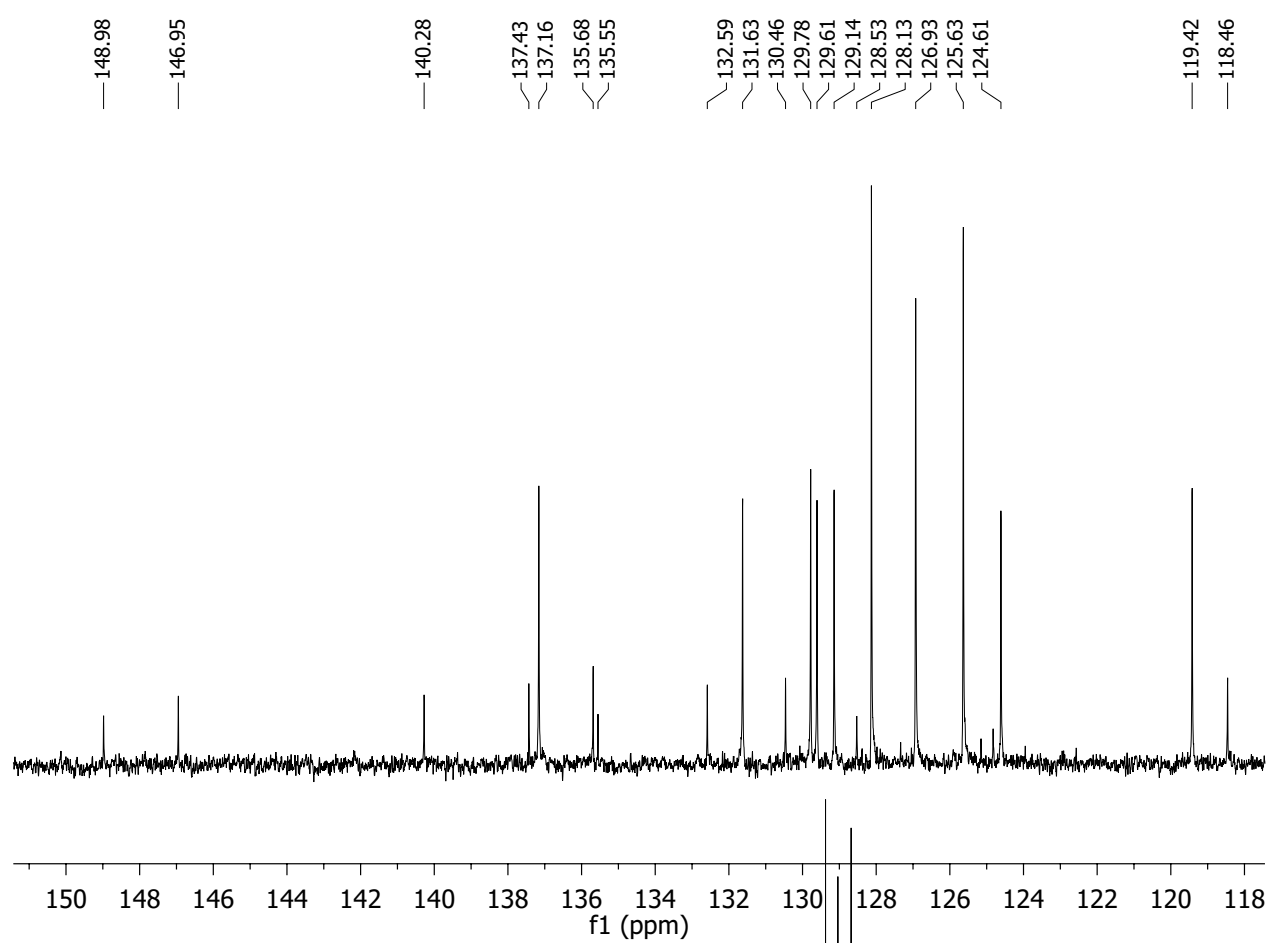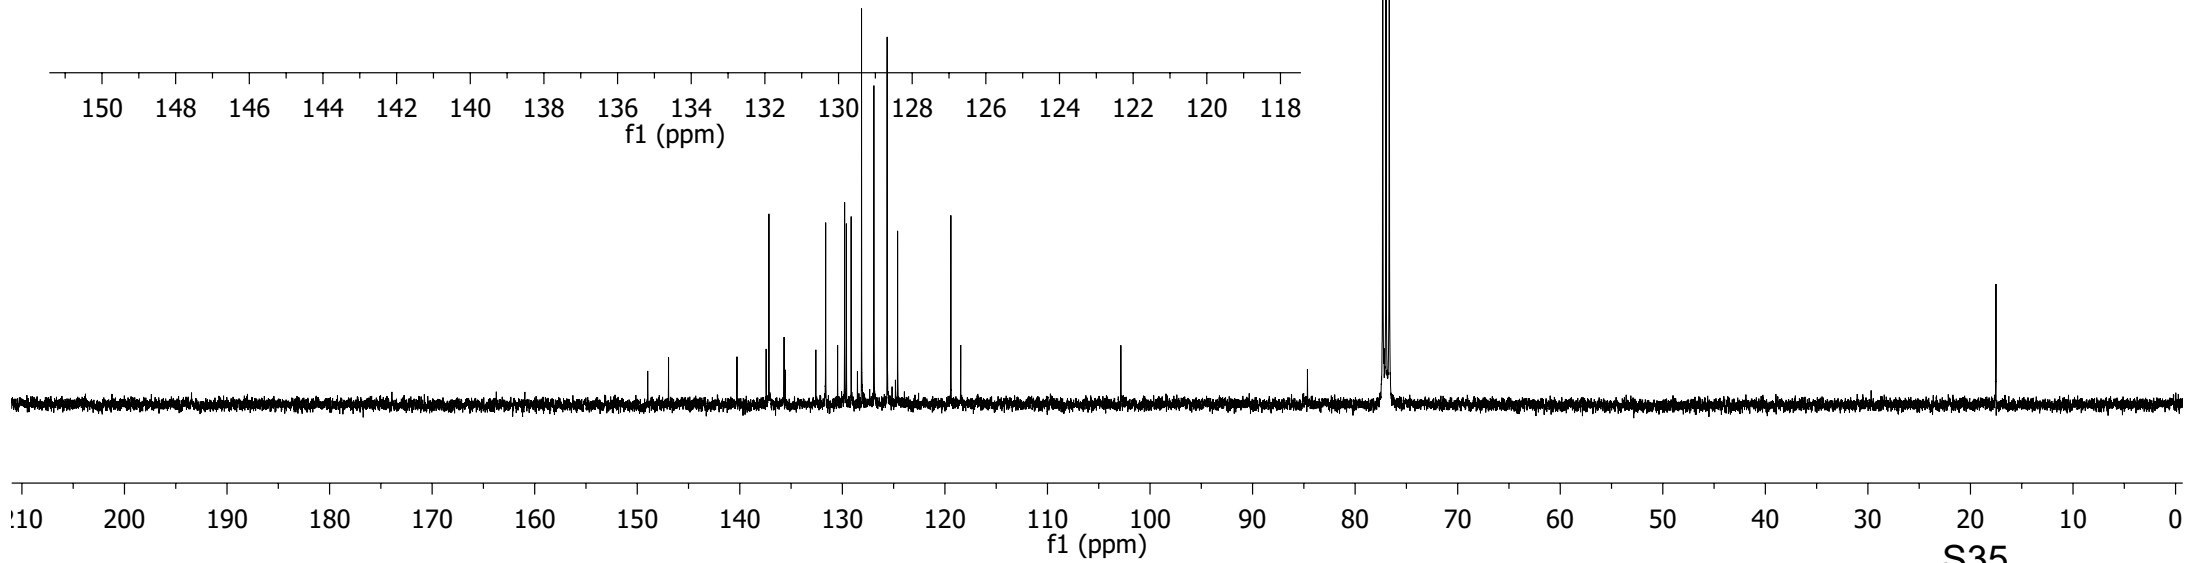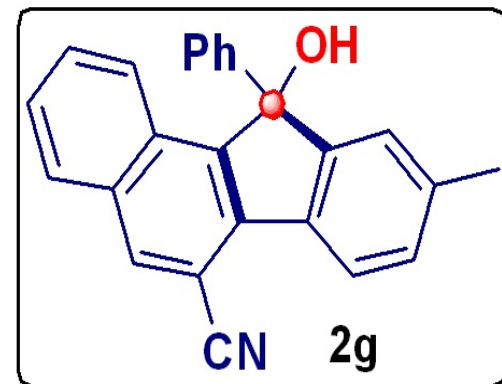

Solvent  $\text{CDCl}_3$   
Spectrometer Frequency 400

8.39  
8.37  
8.27  
7.82  
7.80  
7.67  
7.45  
7.43  
7.42  
7.41  
7.39  
7.39  
7.37  
7.35  
7.34  
7.32  
7.32  
7.31  
7.29  
7.28  
7.27  
7.26  
7.24  
7.23  
7.22

2.38

1.54

-0.00

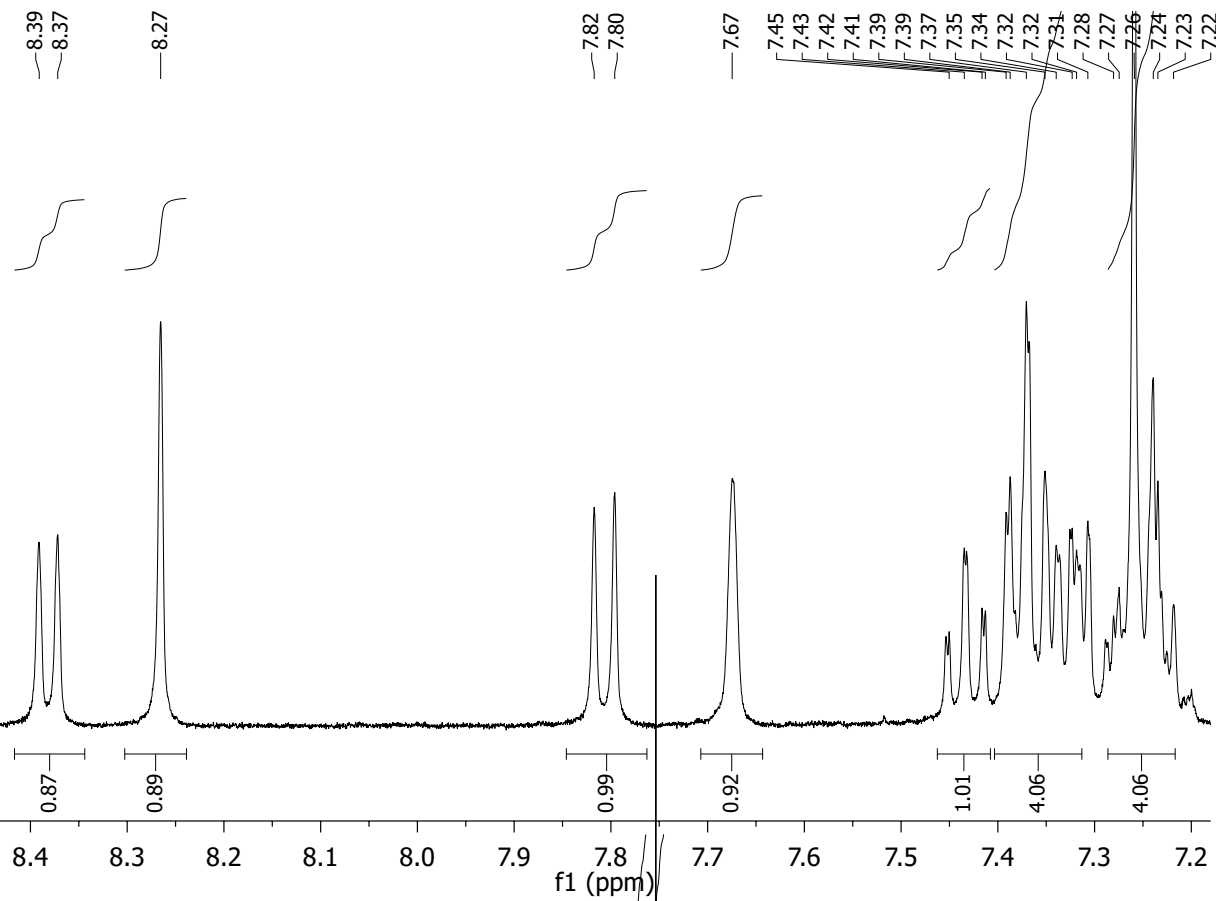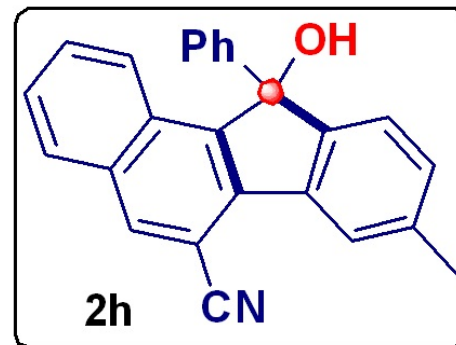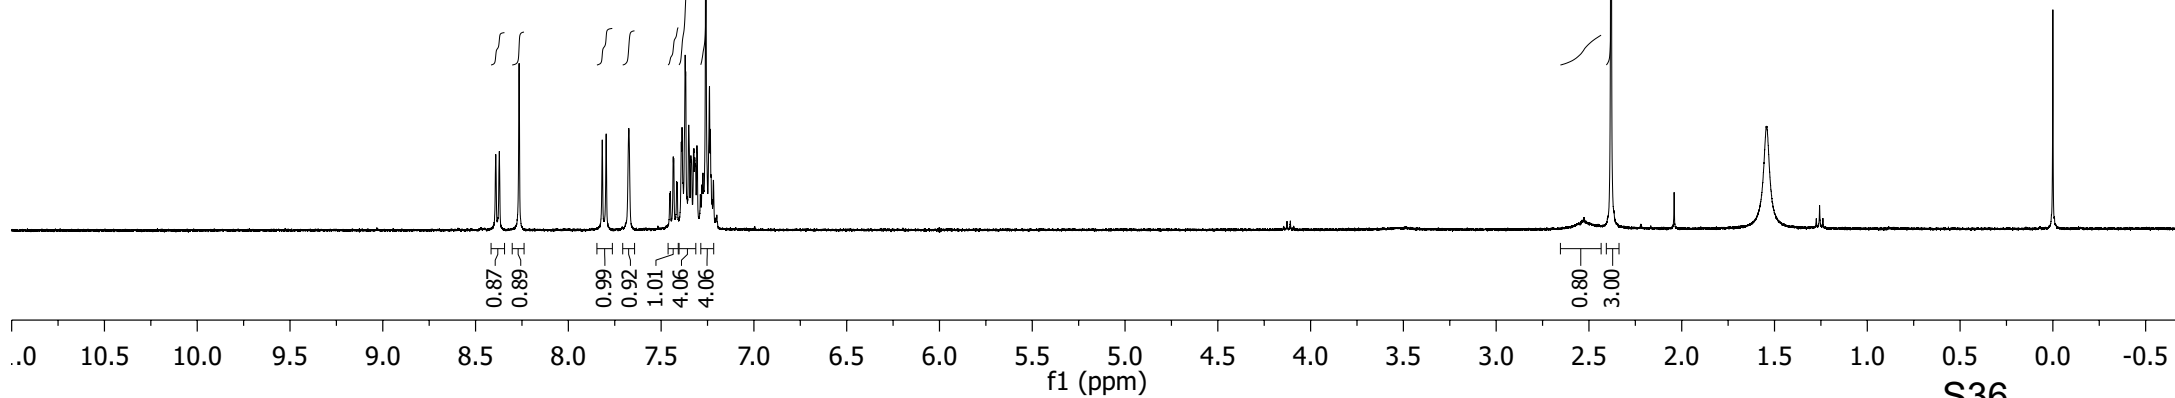

Solvent  $\text{CDCl}_3$   
Spectrometer Frequency 100

— 152.08  
— 145.29  
— 141.79  
— 140.19  
— 136.82  
— 136.26  
— 131.03  
— 129.54  
— 129.47  
— 129.24  
— 128.98  
— 128.53  
— 127.37  
— 124.85  
— 124.19  
— 124.03  
— 121.98  
— 118.52  
— 102.02

— 152.08  
— 145.29  
— 141.79  
— 140.19  
— 136.82  
— 136.26  
— 131.03  
— 129.54  
— 129.47  
— 129.24  
— 128.98  
— 128.53  
— 127.37  
— 124.85  
— 124.19  
— 124.03  
— 121.98  
— 118.52

— 83.59  
— 77.31  
— 76.99  
— 76.68

— 22.30

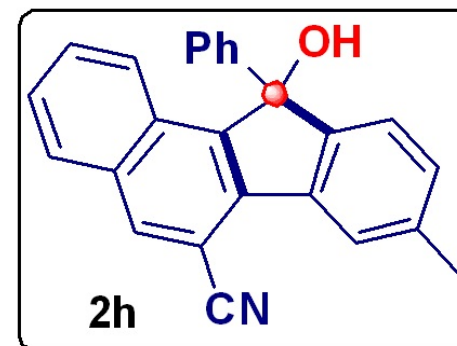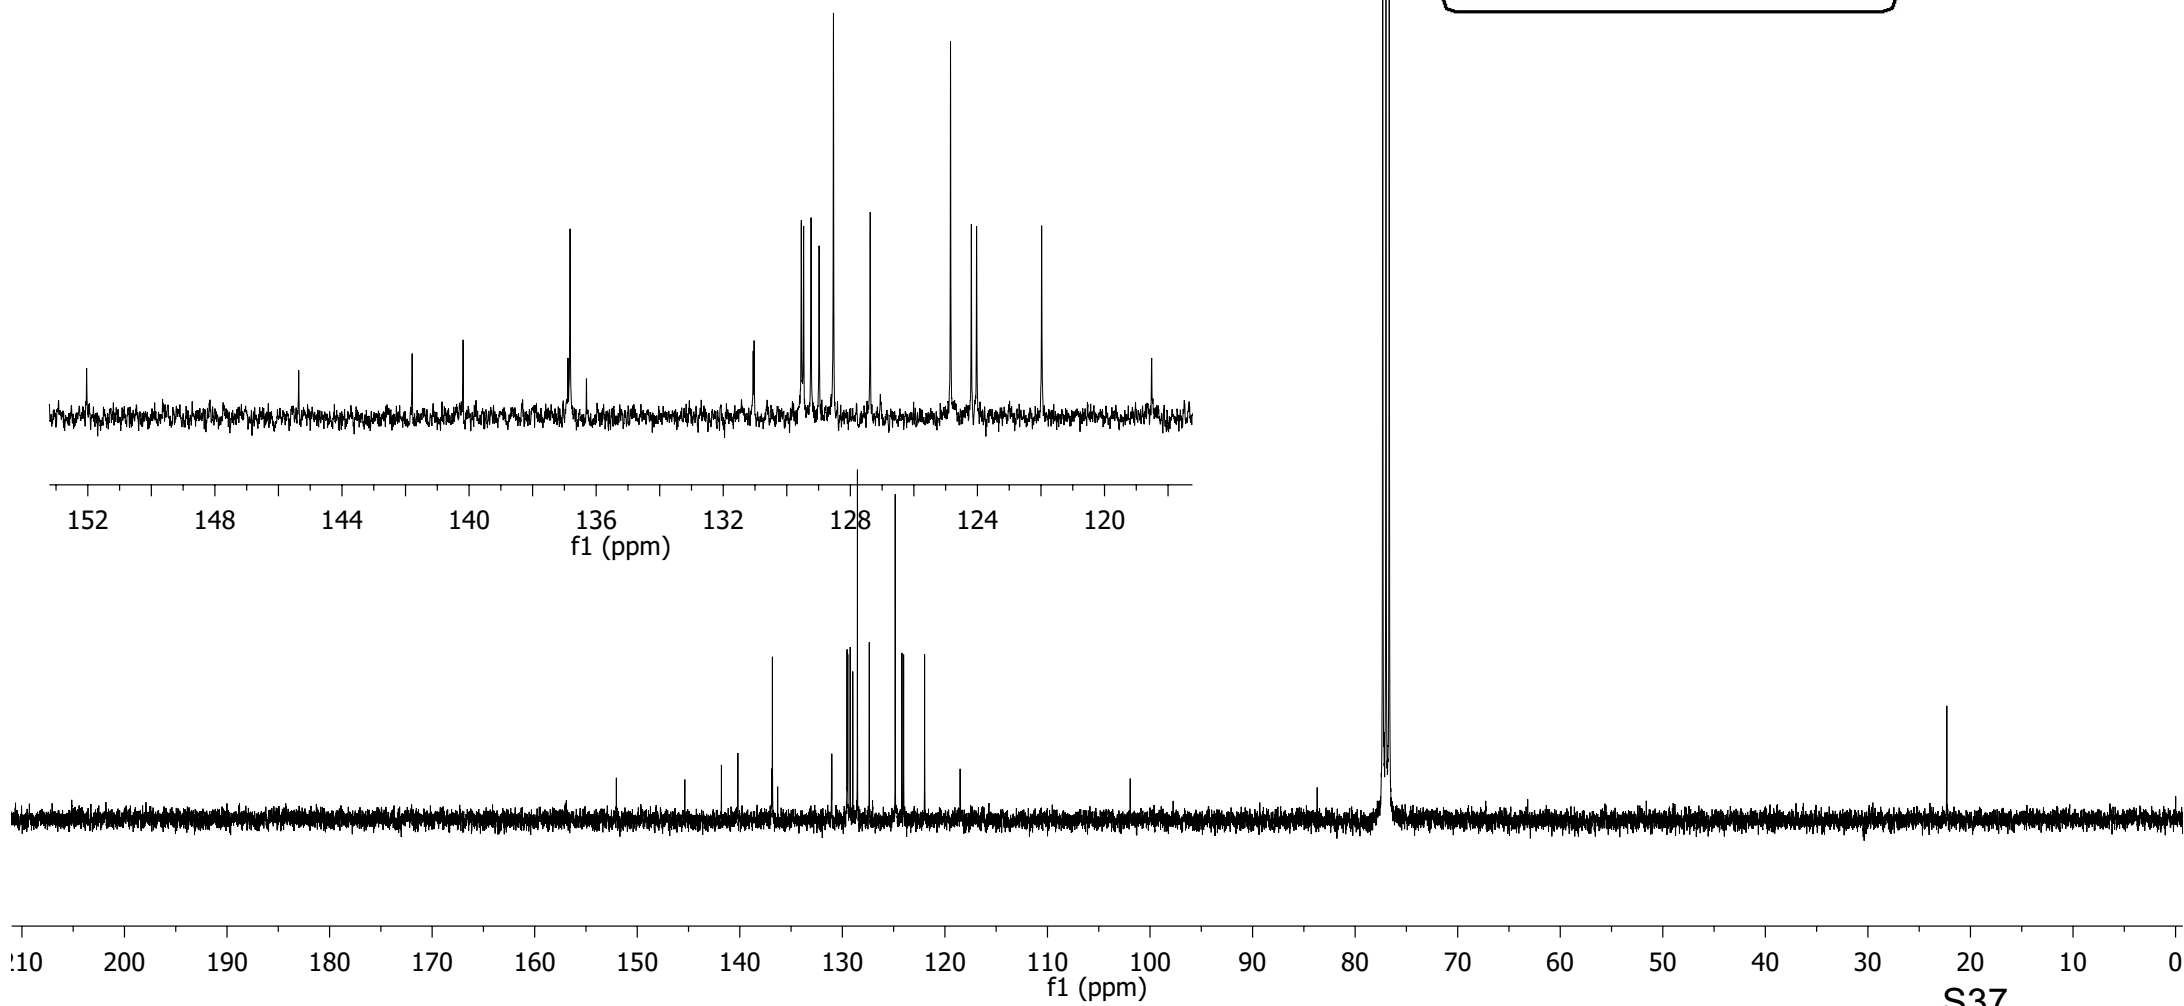

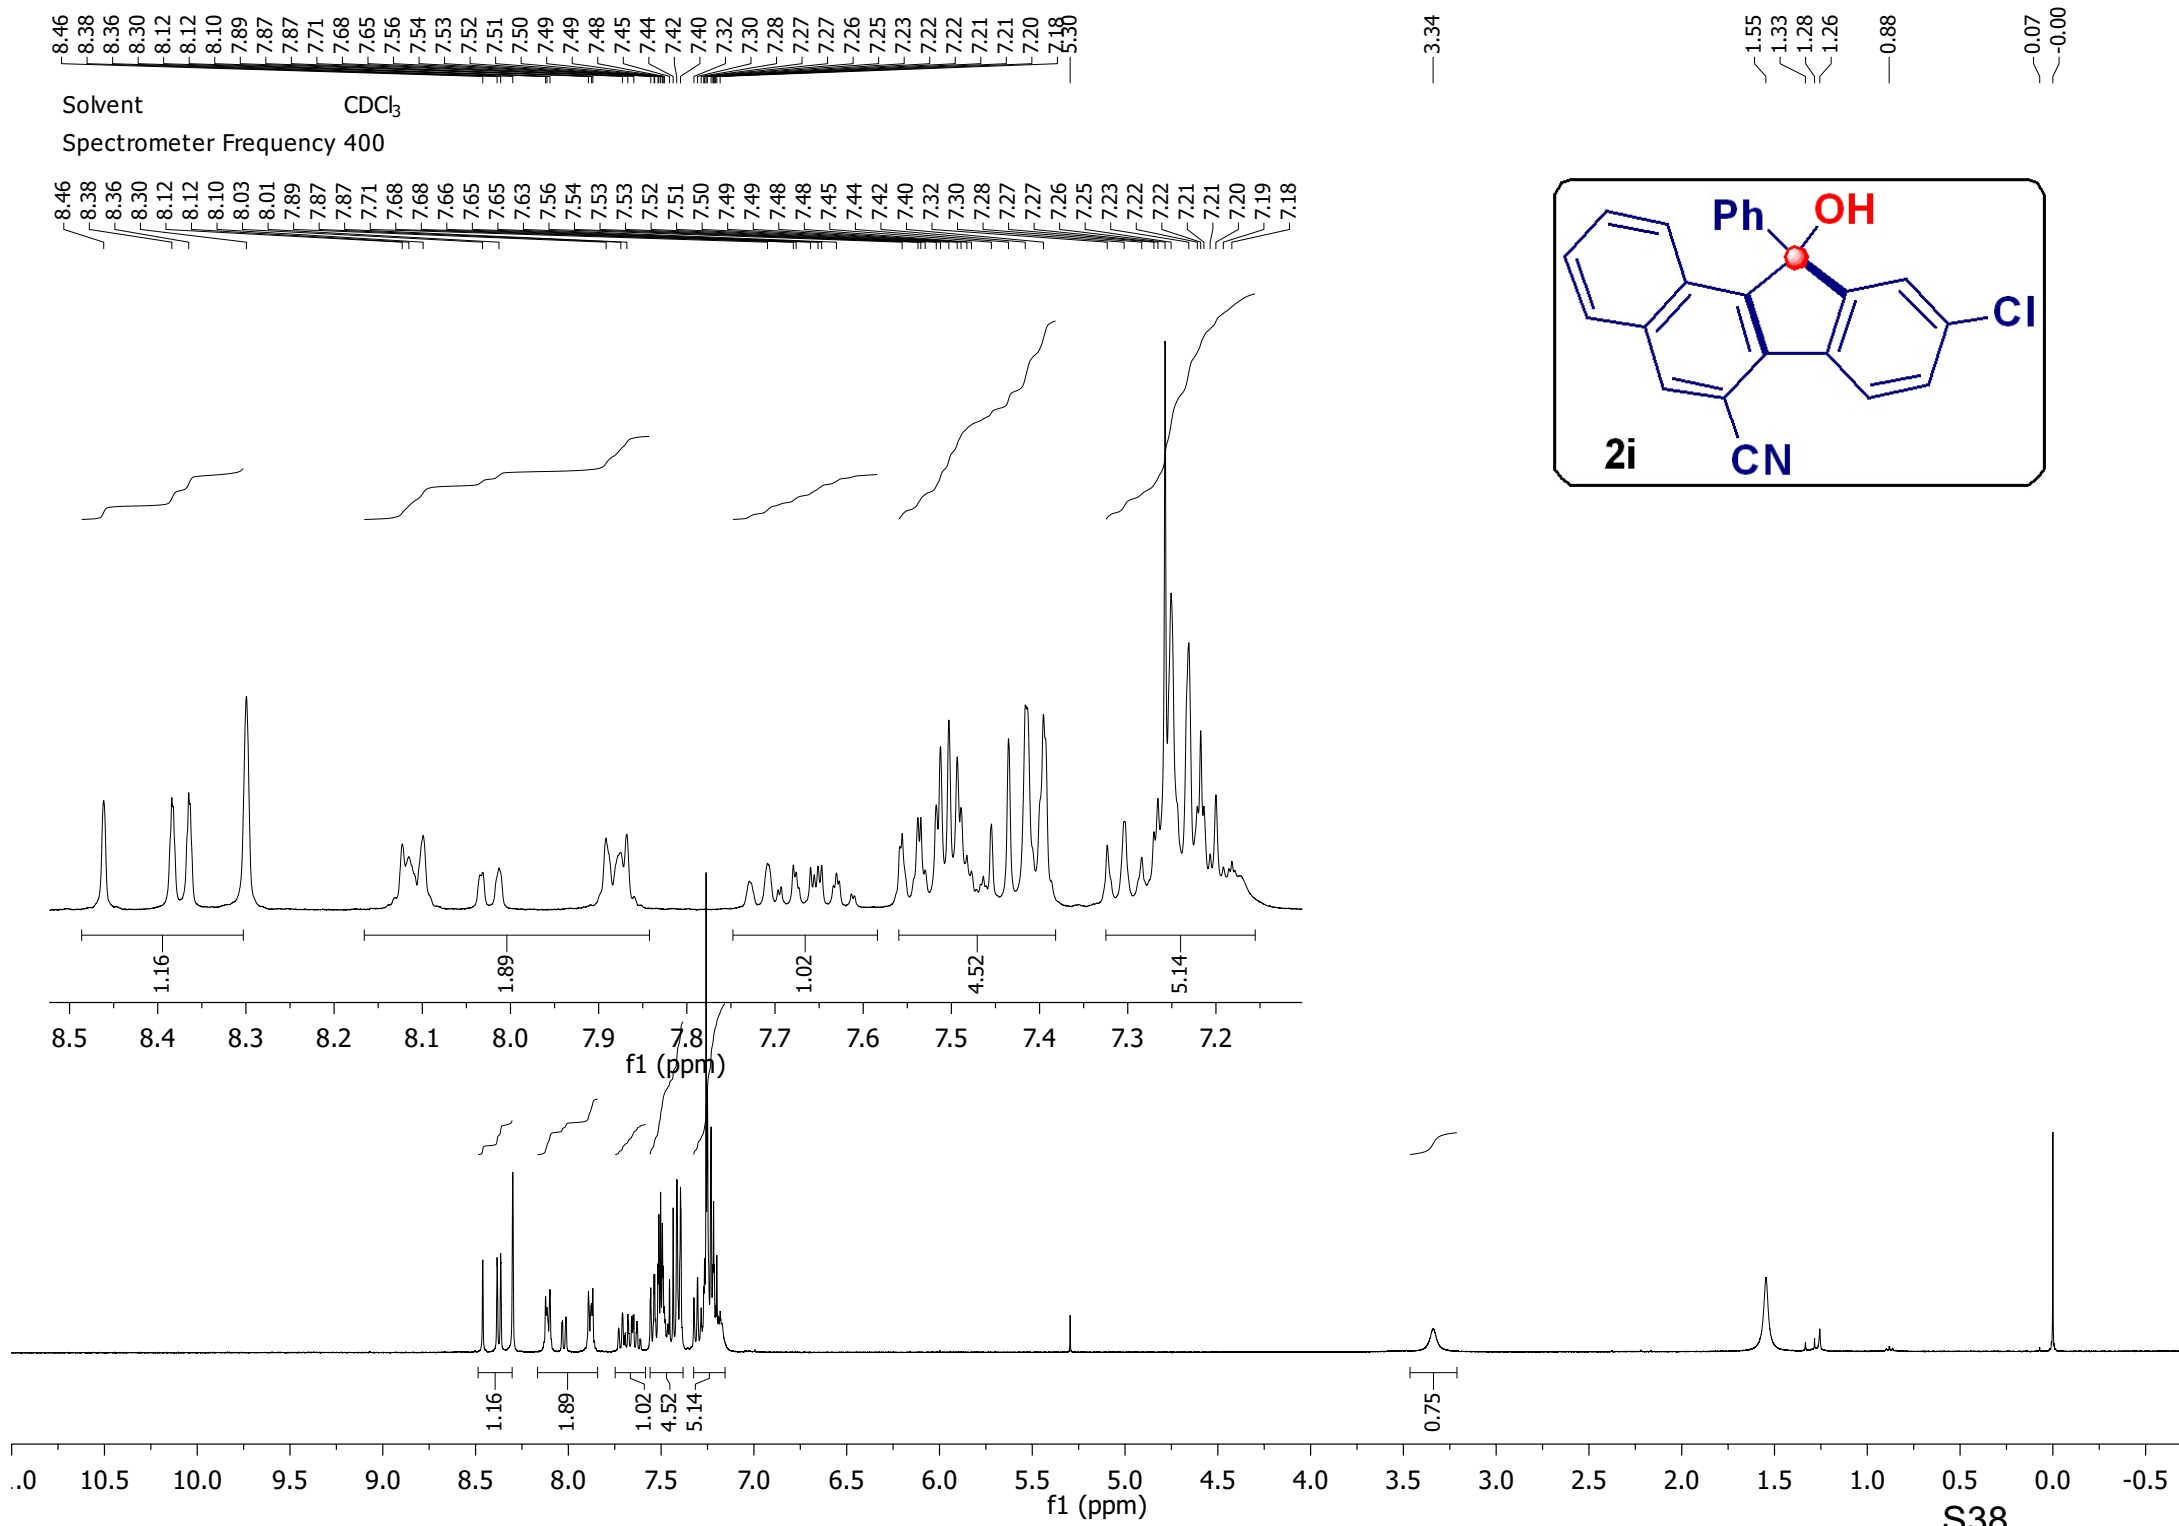

Solvent  $\text{CDCl}_3$   
Spectrometer Frequency 100

147.22  
146.59  
137.38  
136.32  
131.20  
129.99  
129.91  
129.36  
129.15  
128.90  
128.60  
128.60  
128.26  
128.18  
127.46  
127.35  
125.62  
124.93  
120.45  
102.83  
85.04  
77.31  
76.99  
76.68

147.22  
146.59  
140.02  
139.58  
137.38  
136.32  
133.96  
132.88  
131.20  
130.75  
130.49  
130.40  
129.99  
129.91  
129.51  
129.36  
129.15  
128.90  
128.70  
128.60  
128.26  
128.18  
127.46  
127.35  
125.62  
124.93  
120.45  
118.16

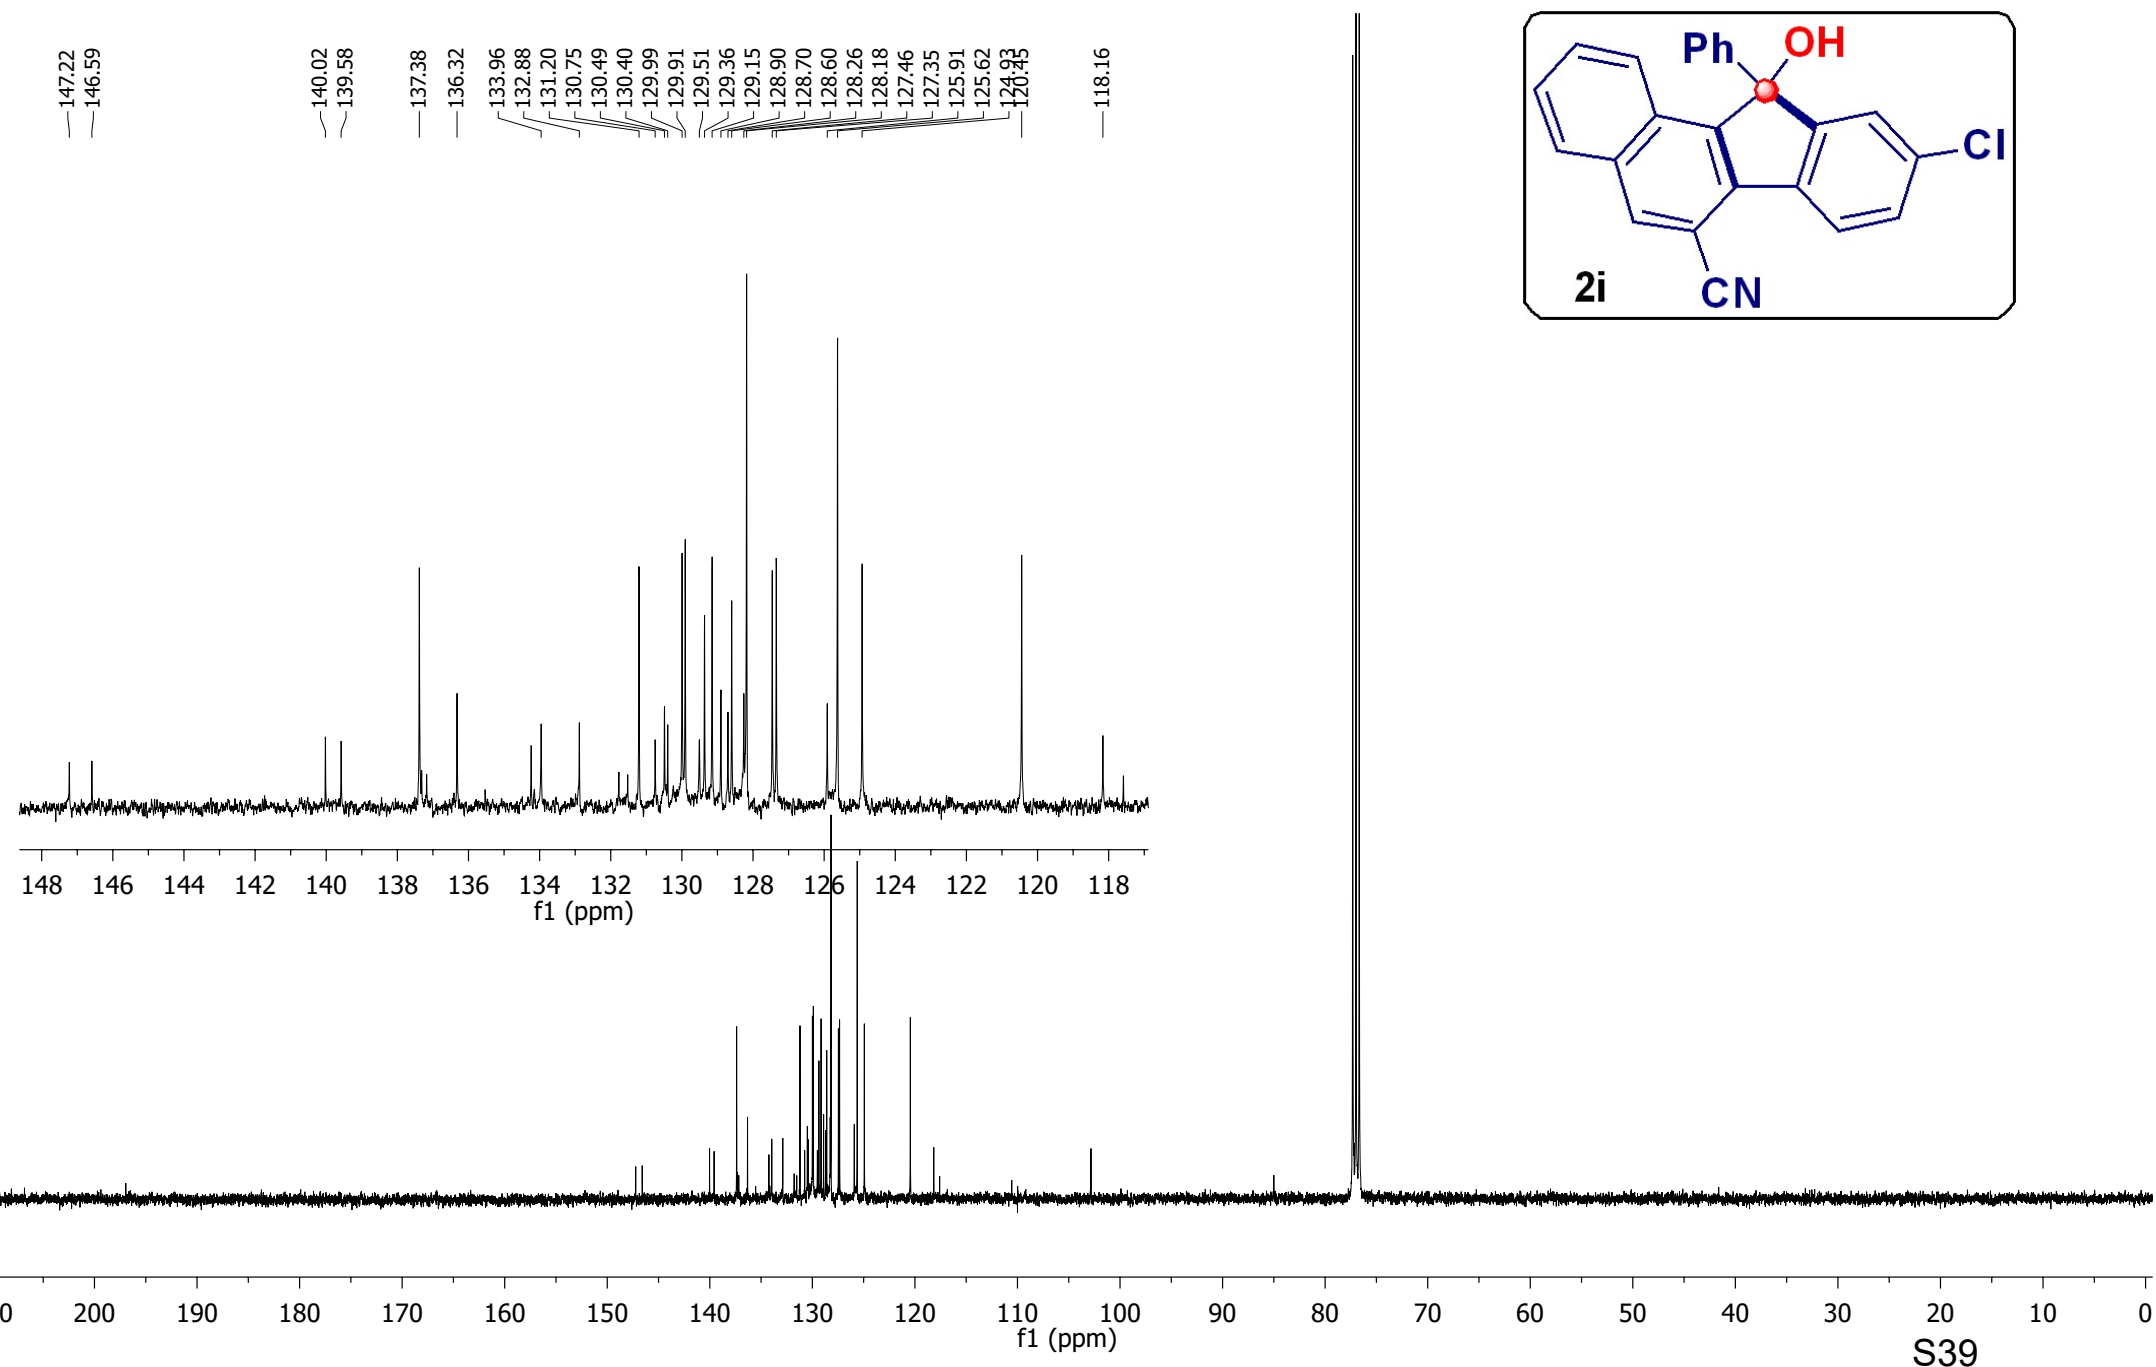

8.46  
8.44  
8.44  
8.42  
8.42  
8.29  
8.17  
8.17  
8.17  
8.16  
8.15  
8.15  
8.15  
8.03  
8.01  
7.89  
7.88  
7.87  
7.86  
7.74  
7.73  
7.71  
7.71  
7.68  
7.68  
7.66  
7.66  
7.65  
7.65  
7.63  
7.63  
7.56  
7.55  
7.54  
7.54  
7.53  
7.52  
7.52  
7.51  
7.51  
7.50  
7.49  
7.49  
7.47  
7.47  
7.44  
7.44  
7.42  
7.42  
7.41  
7.40  
7.40  
7.39  
7.39  
7.39  
7.38  
7.38  
7.37  
7.37  
7.36  
7.36  
7.34  
7.33  
7.31  
7.29  
7.27  
7.26  
7.26  
7.25  
7.25  
7.24  
7.23  
7.22  
7.22  
7.21  
7.21  
7.20  
7.20  
7.19  
7.18  
7.18  
-0.00

Solvent  $\text{CDCl}_3$   
Spectrometer Frequency 400

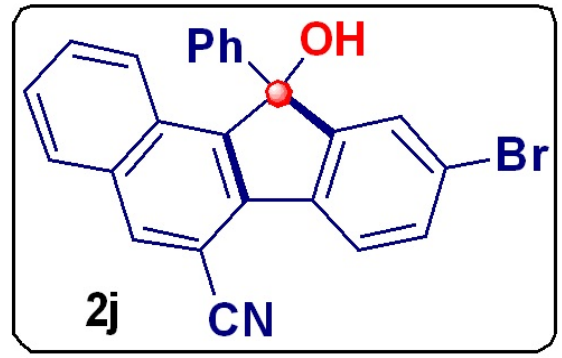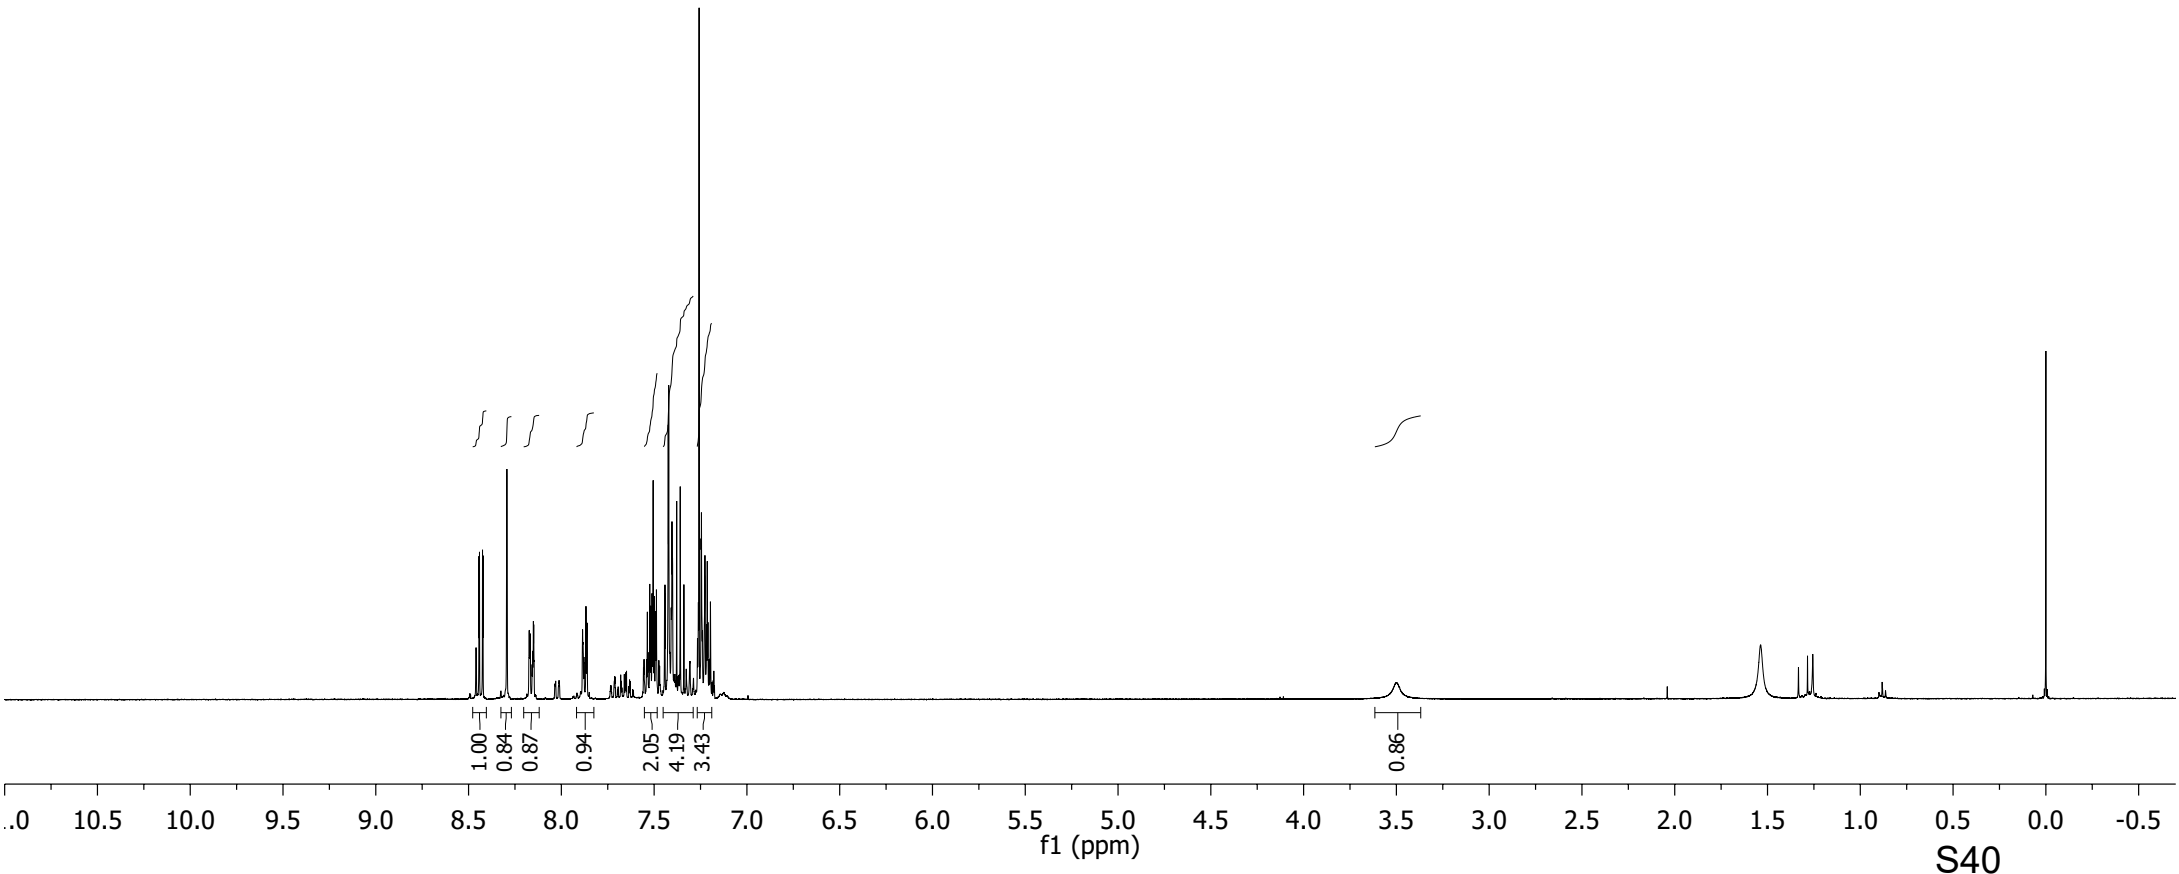



— 148.75  
— 146.61

— 140.49  
— 139.48

— 137.41  
— 136.31

— 133.96  
— 133.05  
— 132.88

— 131.80  
— 131.29  
— 130.39

— 129.89  
— 129.35  
— 129.15

— 128.61  
— 128.13  
— 127.45

— 127.31  
— 125.95  
— 124.98

— 120.98  
— 119.16  
— 118.18

— 85.70

— 77.31  
— 76.99  
— 76.67

Solvent CDCl<sub>3</sub>  
Spectrometer Frequency 100

— 148.75  
— 146.61  
— 137.41  
— 133.96  
— 133.05  
— 132.88  
— 131.29  
— 130.39  
— 129.89  
— 129.35  
— 129.15  
— 128.61  
— 128.13  
— 127.45  
— 127.31  
— 125.95  
— 124.94  
— 120.98

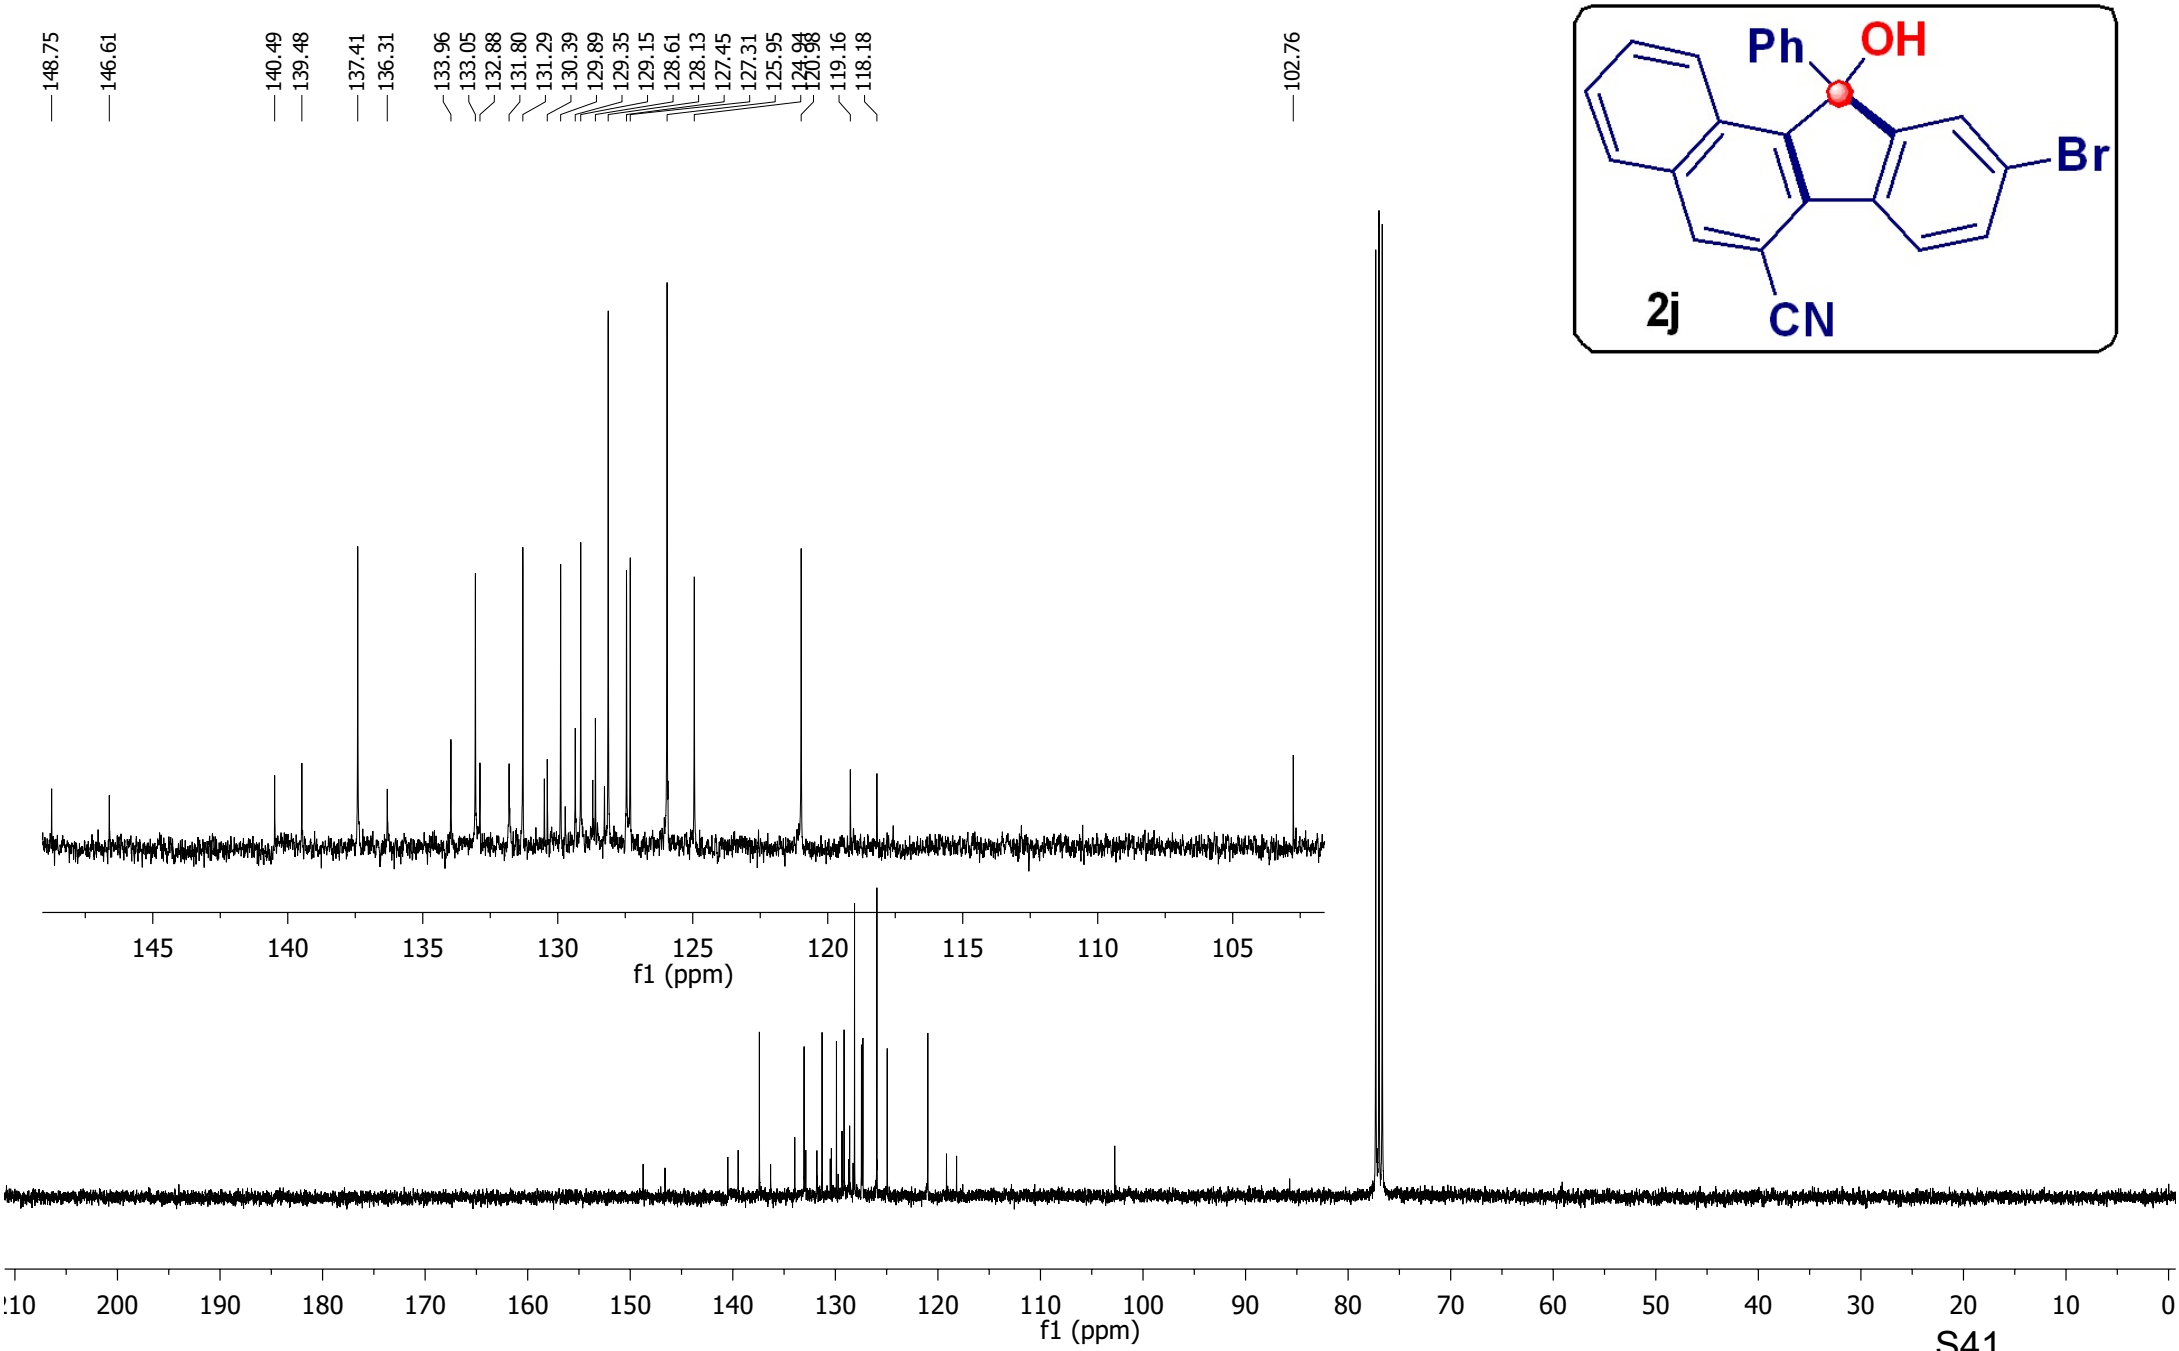

Solvent  $\text{CDCl}_3$   
 Spectrometer Frequency 400

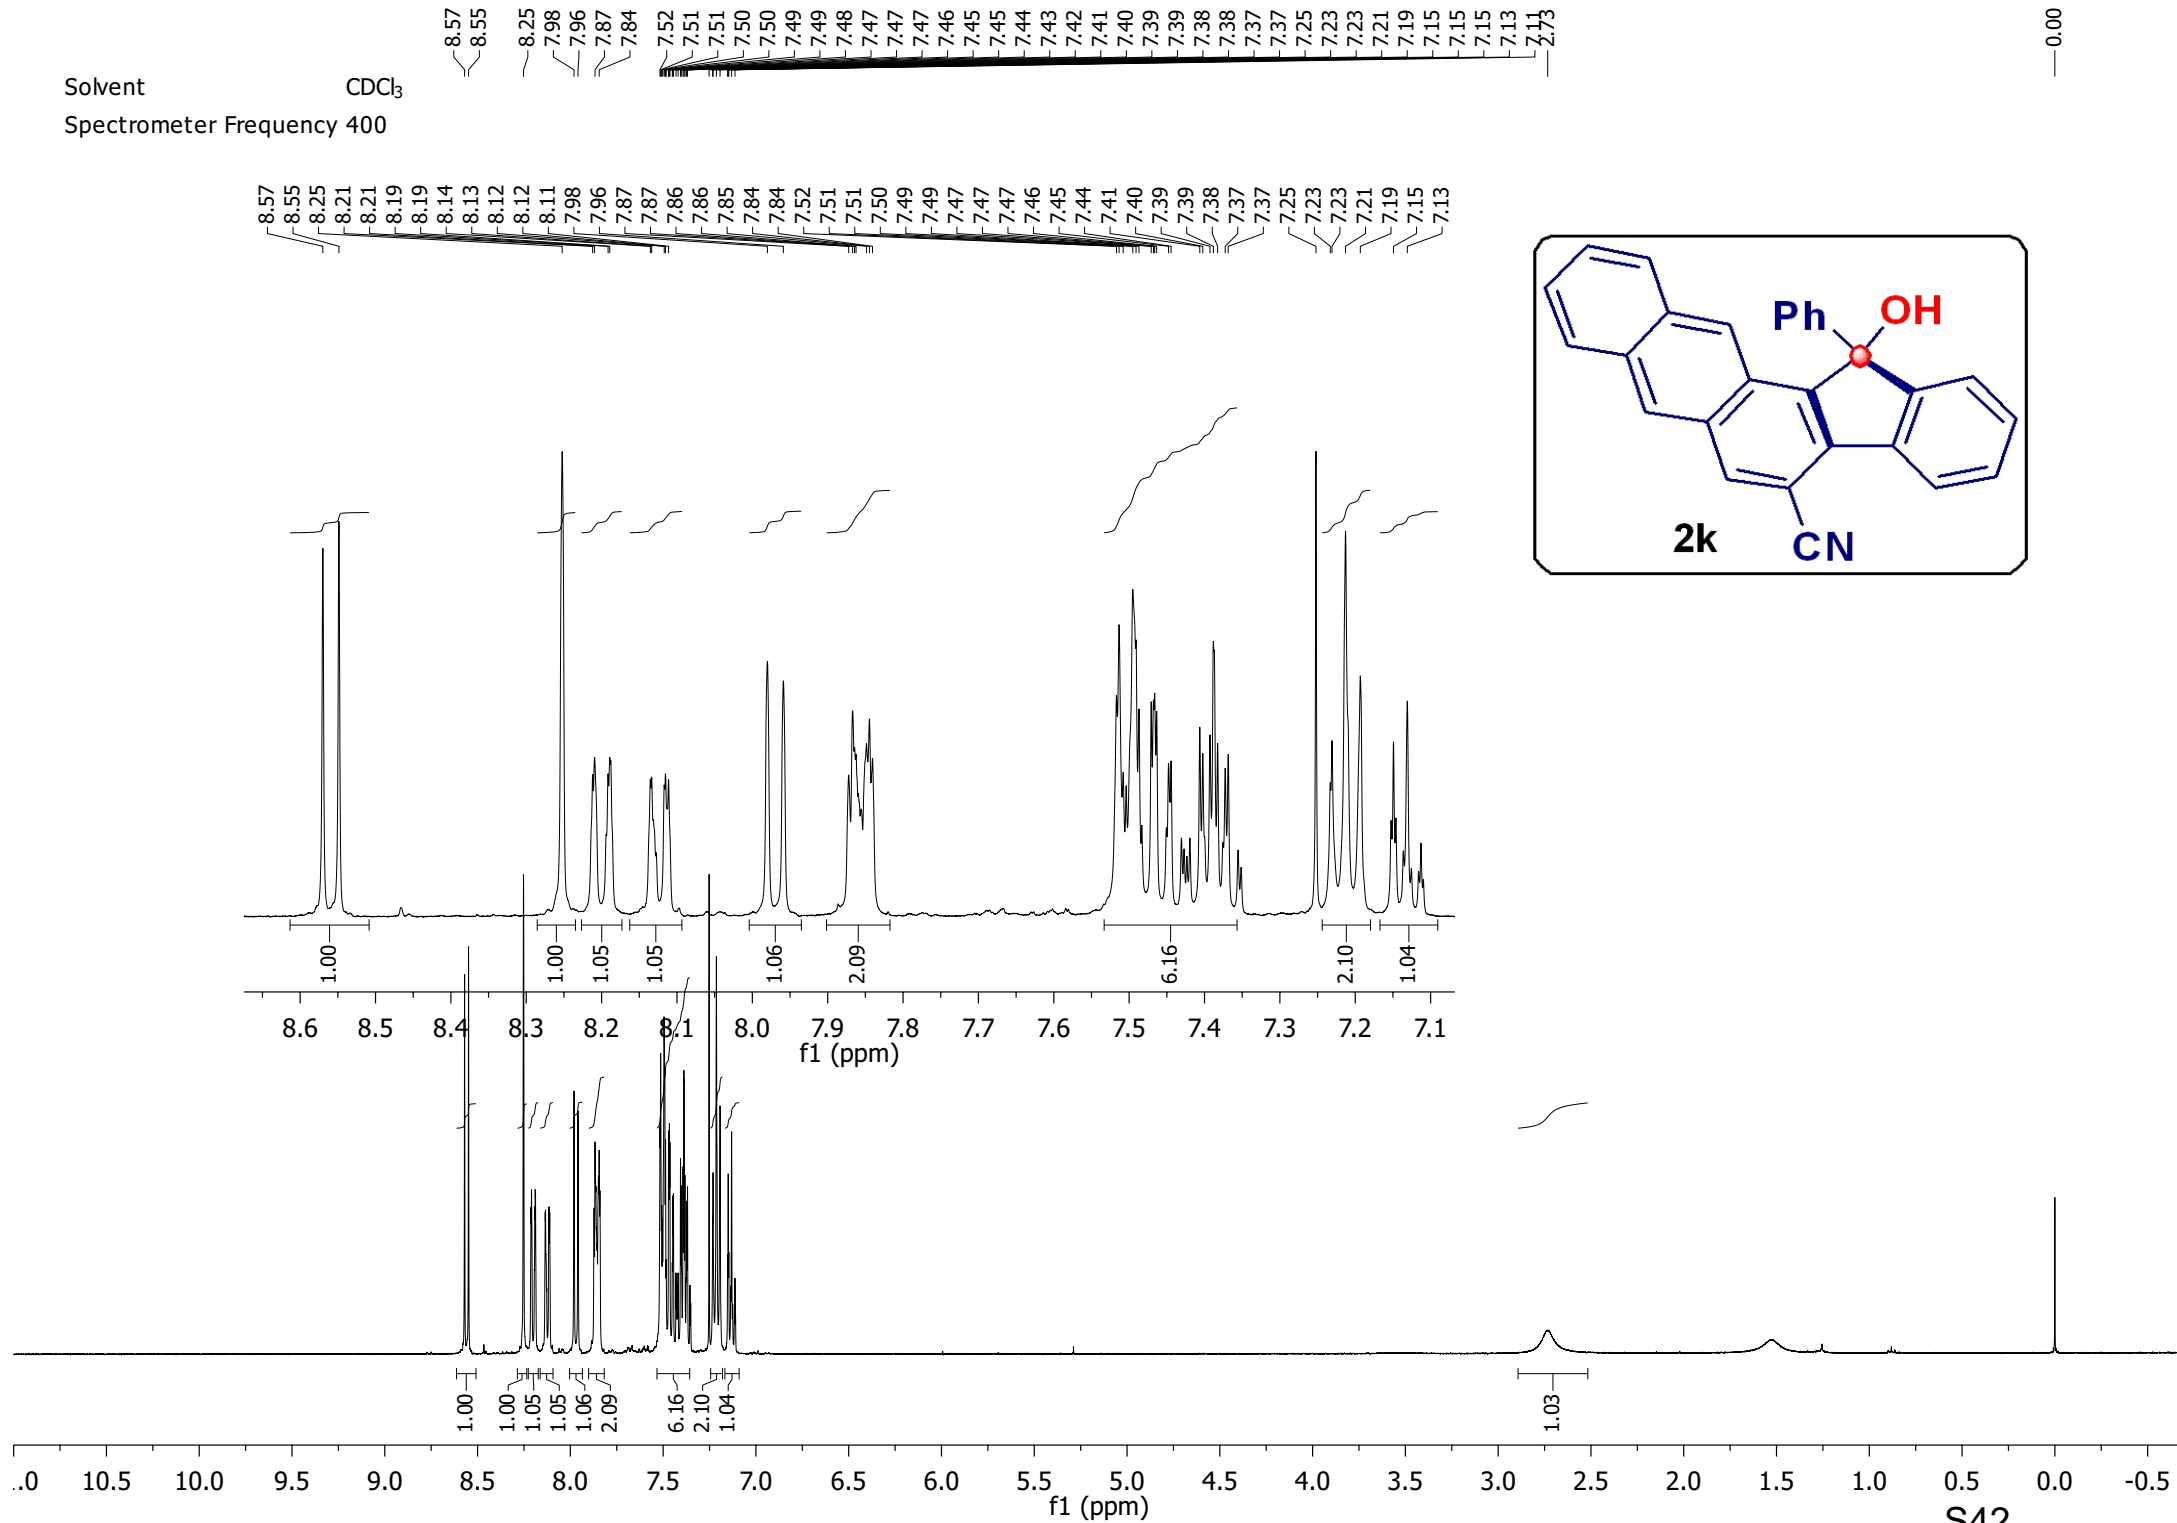

Solvent  $\text{CDCl}_3$   
Spectrometer Frequency 100

148.27 146.69 141.16 136.99 135.83 135.00 134.27 132.39 130.94 130.31 129.69 129.17 128.95 128.49 127.09 127.04 126.96 126.24 125.09 124.27 123.93 119.17 118.59 85.04 77.31 76.99 76.68

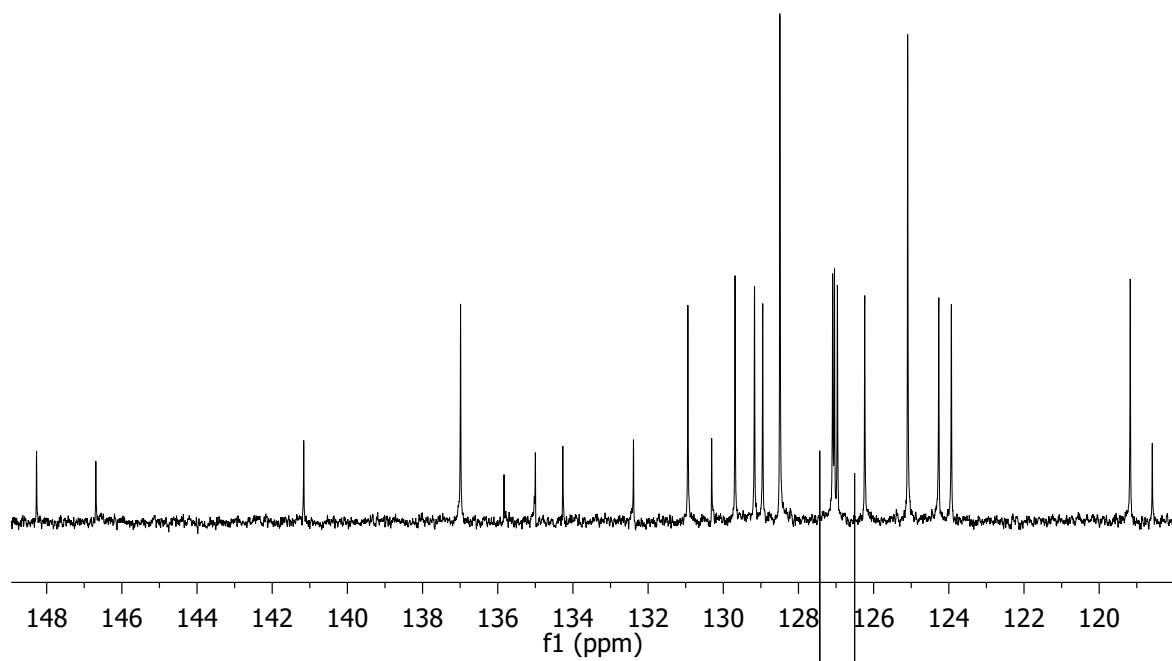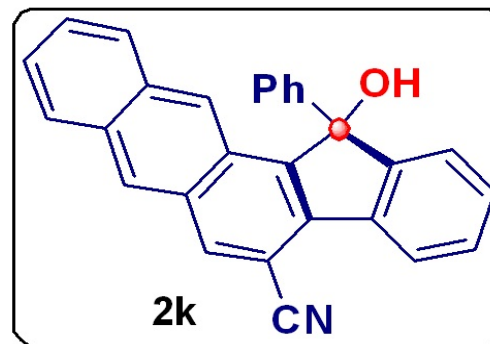

10 200 190 180 170 160 150 140 130 120 110 100 90 80 70 60 50 40 30 20 10 0

Solvent

CDCl<sub>3</sub>

Spectrometer Frequency 597

9.40  
9.38  
8.49  
8.48  
8.48  
8.41  
8.35  
8.34  
8.32  
8.30  
7.92  
7.91  
7.85  
7.83  
7.76  
7.75  
7.74  
7.73  
7.58  
7.57  
7.55  
7.51  
7.49  
7.49  
7.48  
7.44  
7.43  
7.42  
7.42  
7.42  
7.41  
7.39  
7.39  
7.35  
7.35  
7.34  
7.34  
7.33  
7.33  
7.31  
7.31  
7.31  
7.31  
7.30  
7.26  
7.25  
7.24  
7.23  
7.23  
7.16  
7.15  
7.14  
7.13  
7.13  
7.12  
-0.00

8.49  
8.48  
8.48  
8.41  
8.35  
8.34  
8.32  
8.30  
7.92  
7.91  
7.85  
7.83  
7.76  
7.75  
7.74  
7.73  
7.58  
7.57  
7.55  
7.51  
7.49  
7.49  
7.48  
7.44  
7.43  
7.42  
7.42  
7.42  
7.41  
7.39  
7.39  
7.35  
7.35  
7.34  
7.34  
7.33  
7.33  
7.31  
7.31  
7.31  
7.31  
7.30  
7.26  
7.25  
7.24  
7.23  
7.23  
7.16  
7.15  
7.14  
7.13  
7.13  
7.12

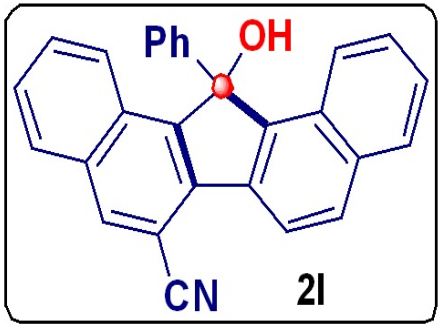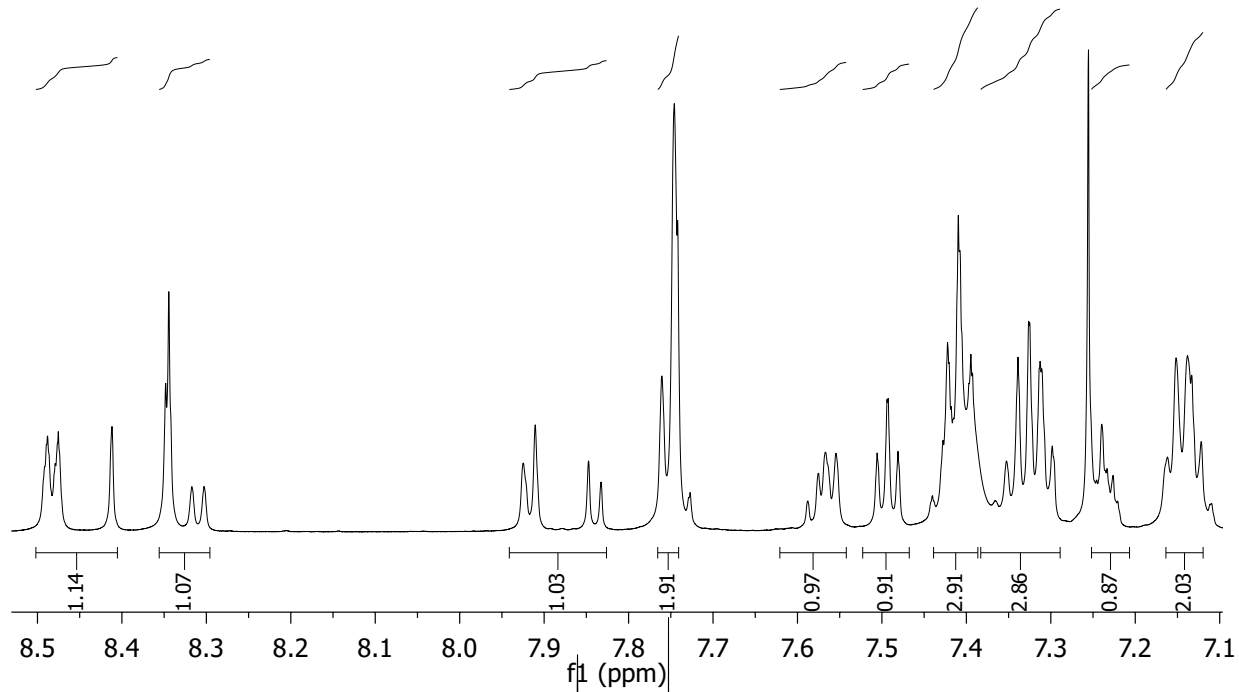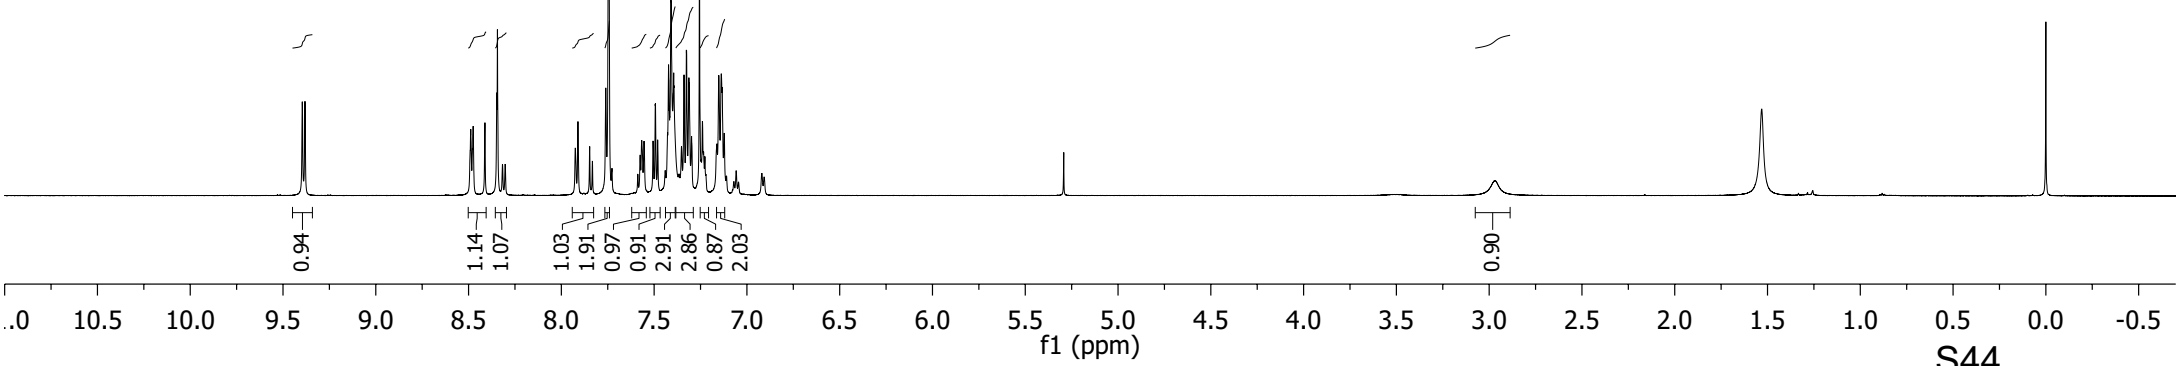

Solvent CDCl<sub>3</sub>  
Spectrometer Frequency 100

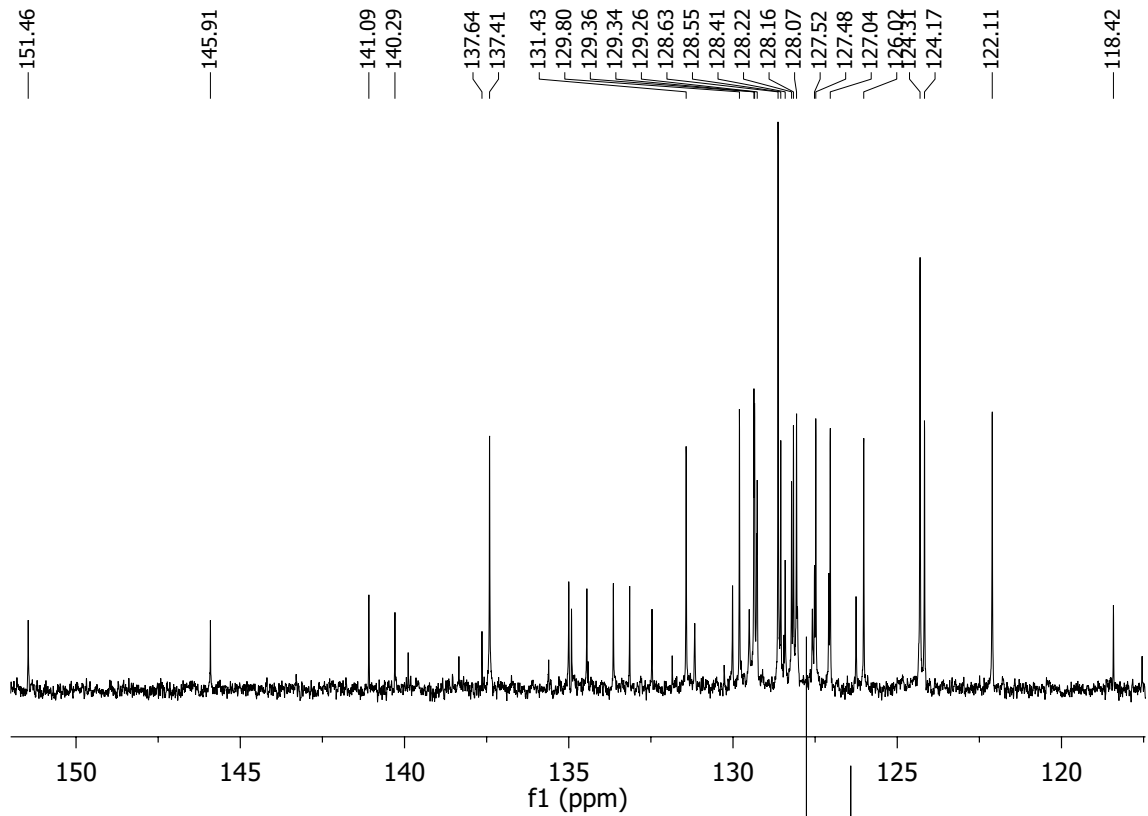

85.30, 77.31, 76.99, 76.67

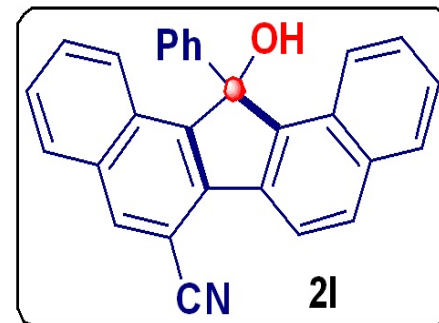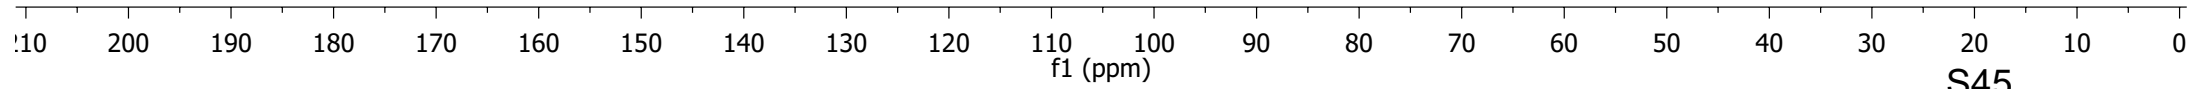

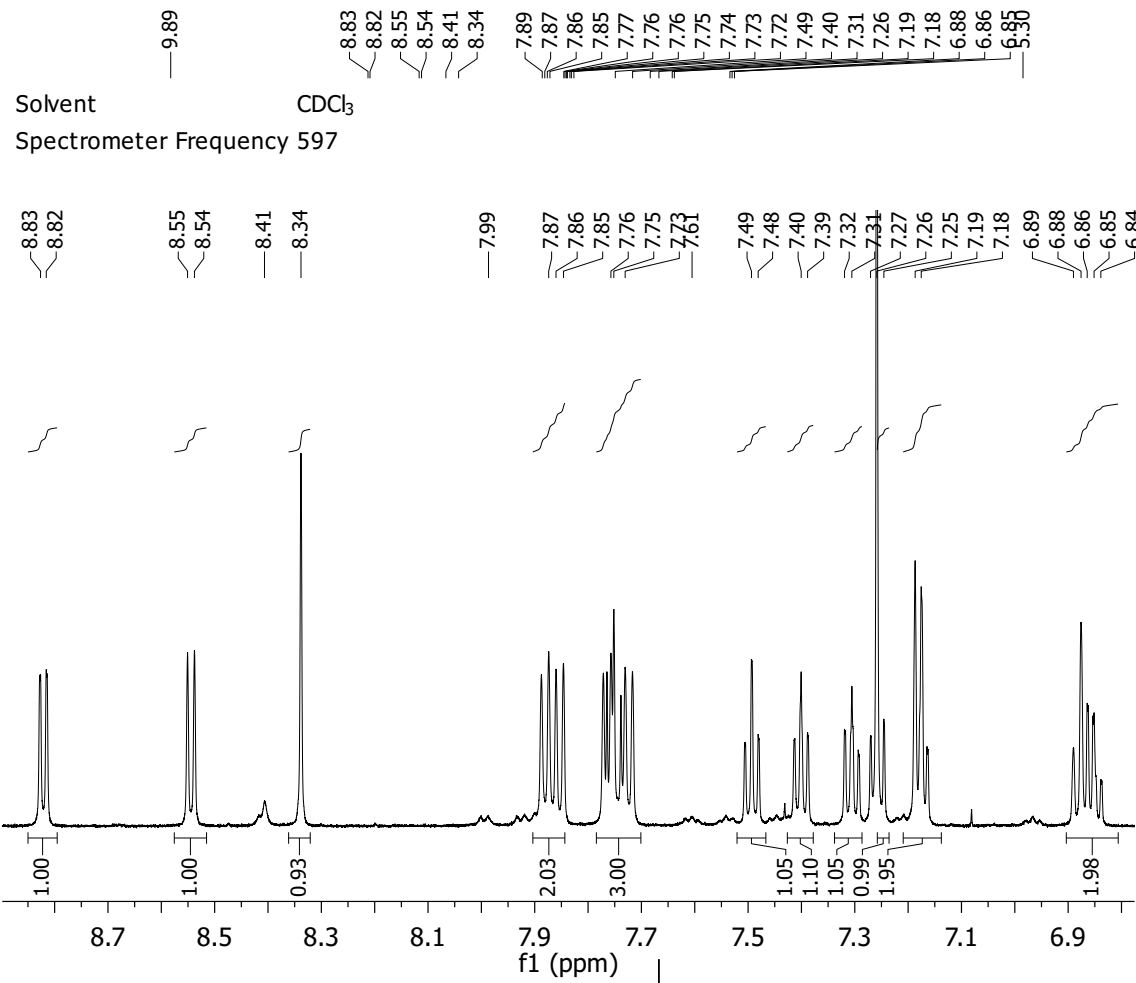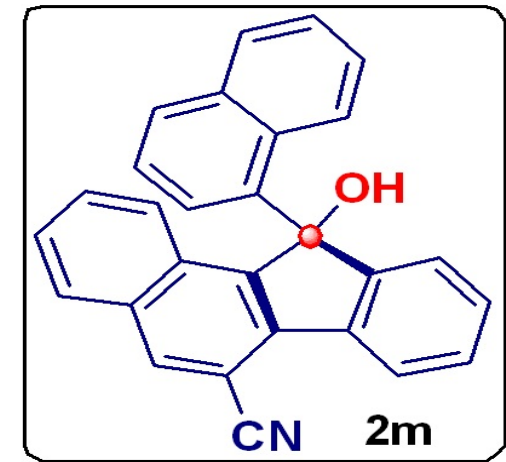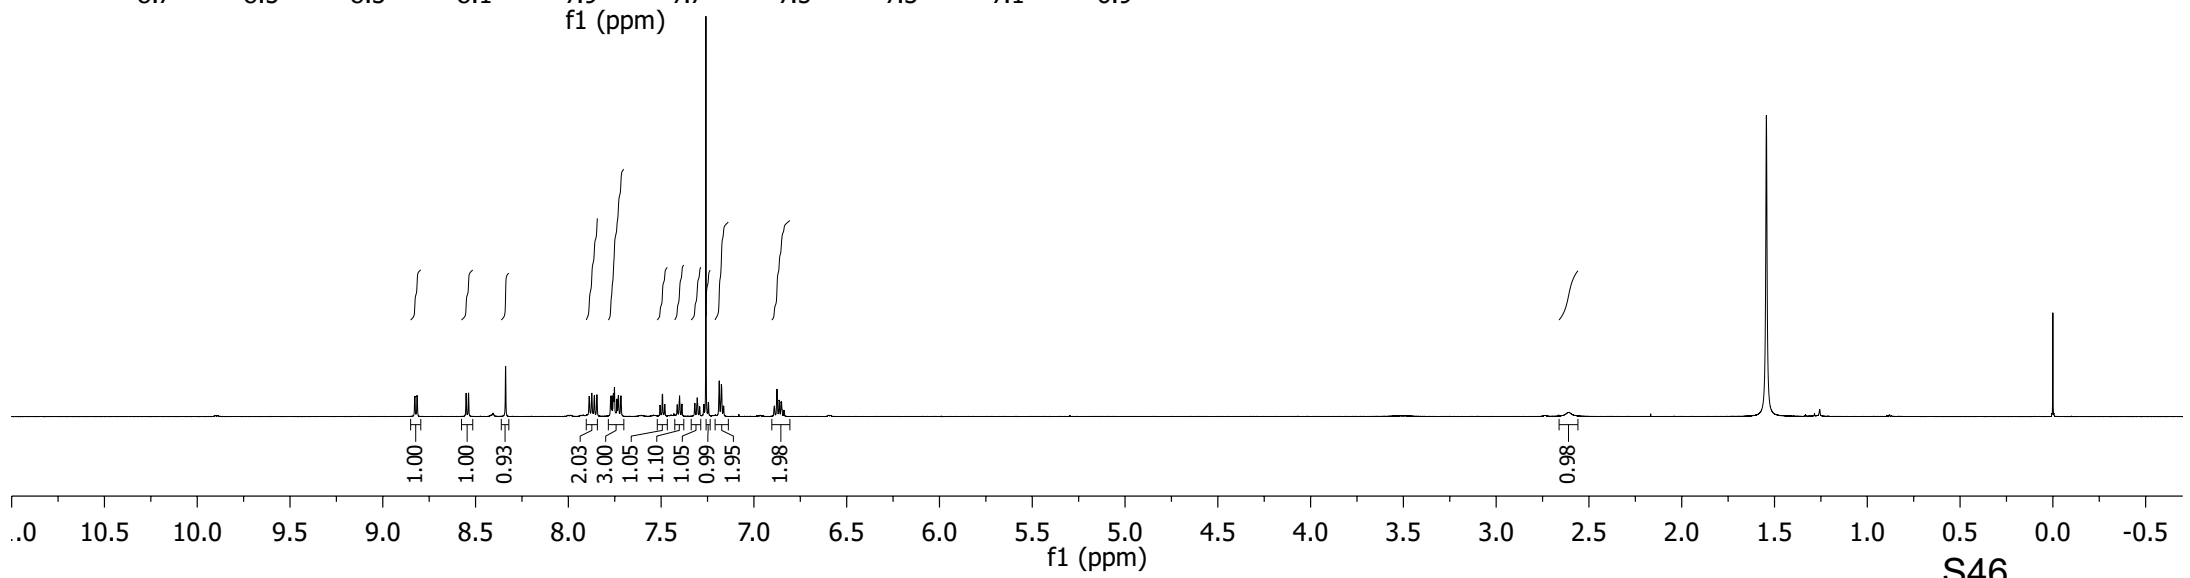

Solvent  $\text{CDCl}_3$   
Spectrometer Frequency 150

151.39 147.19 137.38 137.08 136.72 135.86 134.09 132.65 131.13 129.93 129.76 129.65 129.39 129.16 128.77 127.22 125.98 125.36 125.15 124.96 124.06 123.52 122.59 118.43 110.07 103.39

151.39 147.19 137.08 129.93 129.76 129.65 129.39 129.16 128.77 127.22 125.98 125.36 124.96 124.06 123.52 122.59 120.89 103.39 82.65 77.20 76.99 76.78

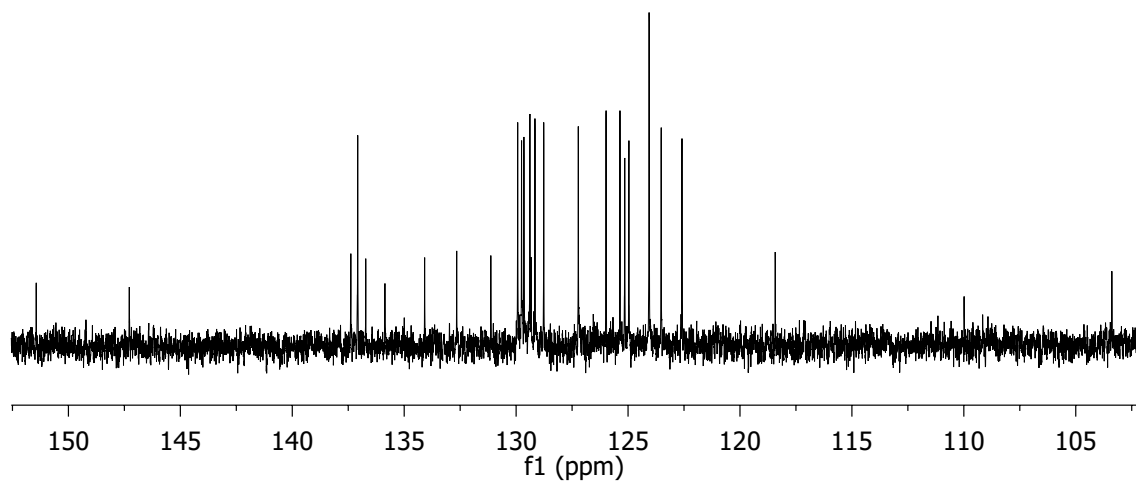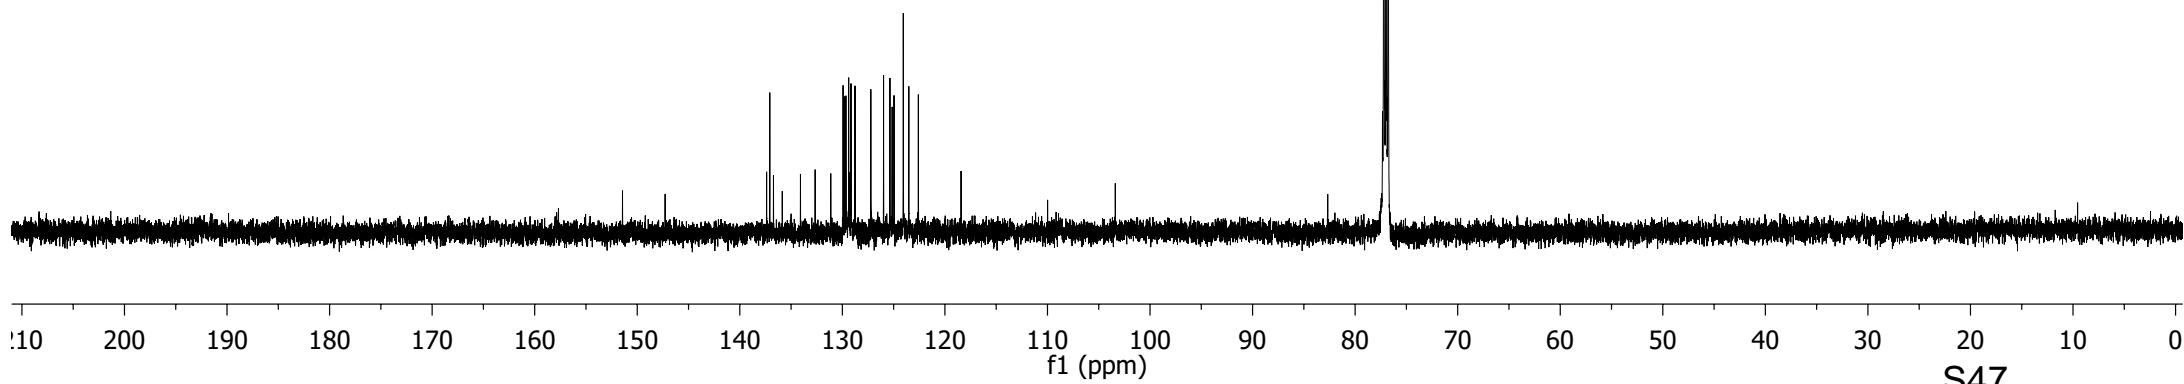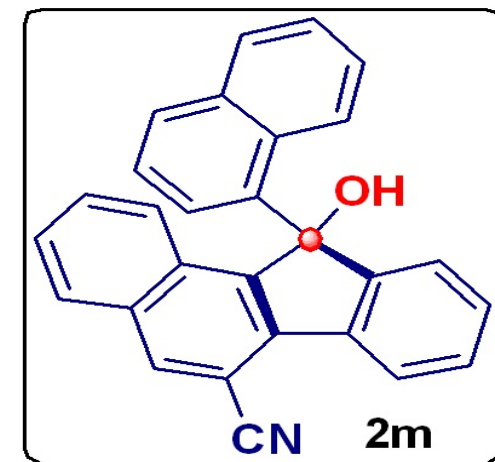

Solvent  $\text{CDCl}_3$   
Spectrometer Frequency 400

8.40  
8.38  
8.32  
7.93  
7.93  
7.91  
7.51  
7.51  
7.50  
7.49  
7.48  
7.44  
7.44  
7.44  
7.37  
7.36  
7.36  
7.34  
7.33  
7.32  
7.31  
7.26  
7.20  
7.15  
7.15  
7.13  
7.13

2.26

-0.00

8.40  
8.38  
8.32

7.93  
7.93  
7.91

7.51  
7.51  
7.50  
7.49  
7.48  
7.44  
7.44

7.37  
7.36  
7.33  
7.32  
7.26  
7.15  
7.15  
7.13  
7.13

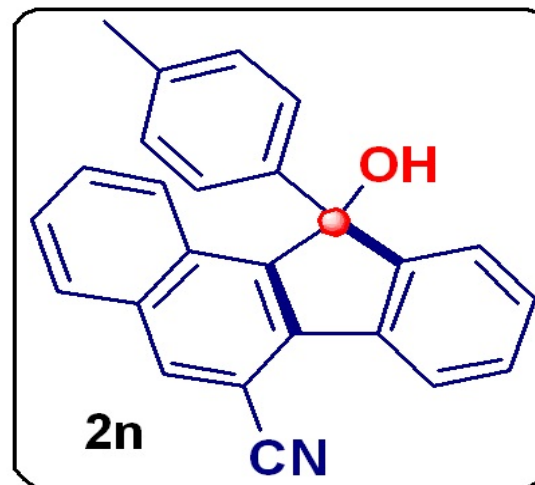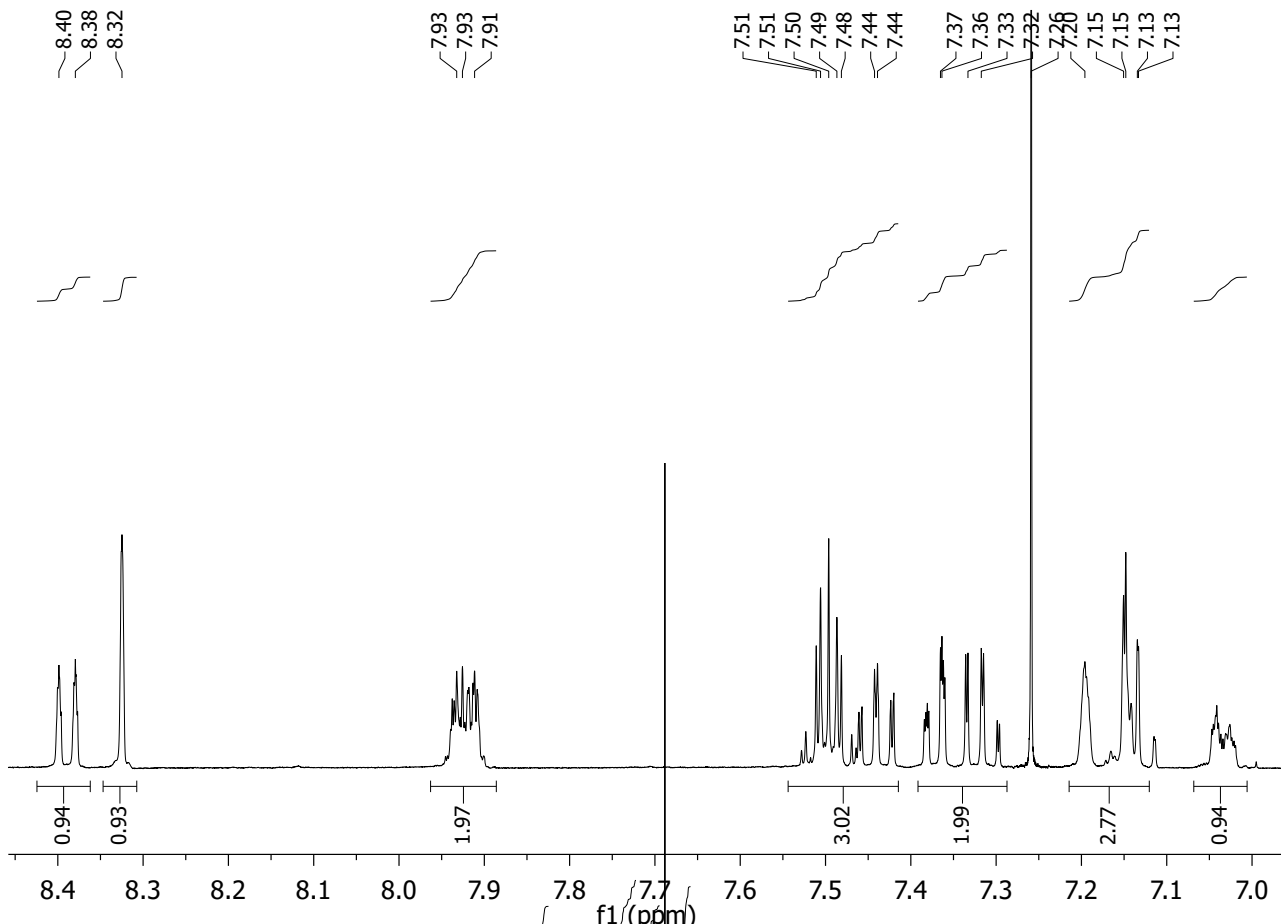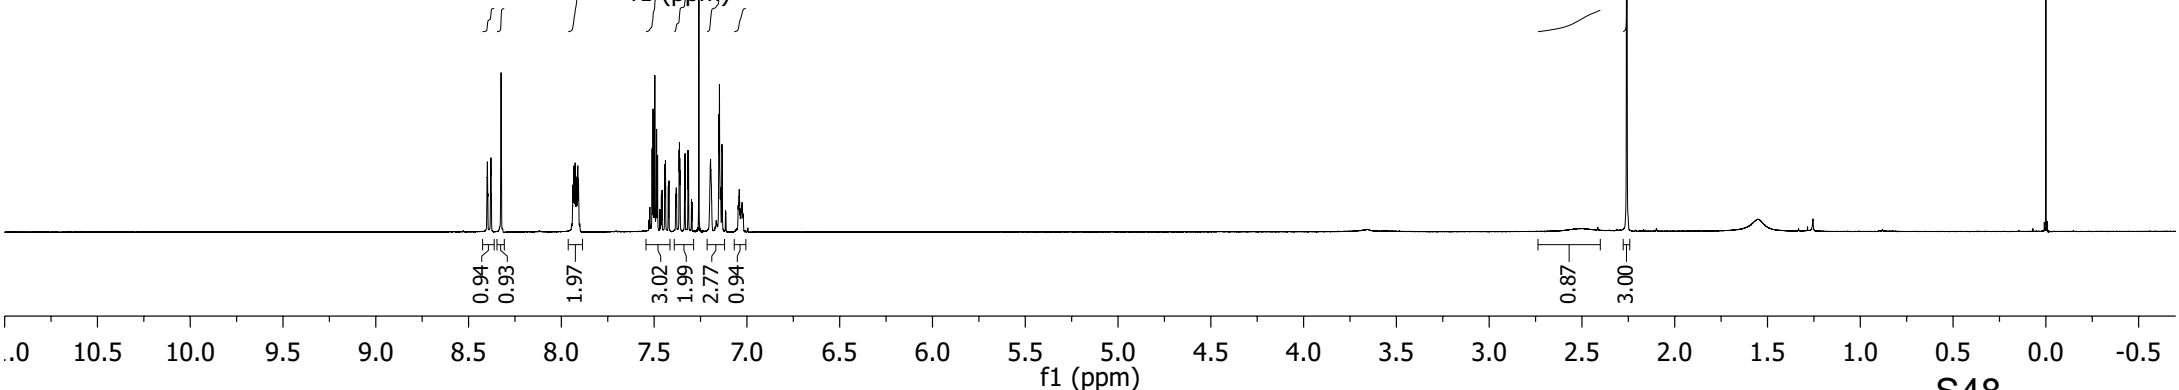



Solvent  $\text{CDCl}_3$   
Spectrometer Frequency 100

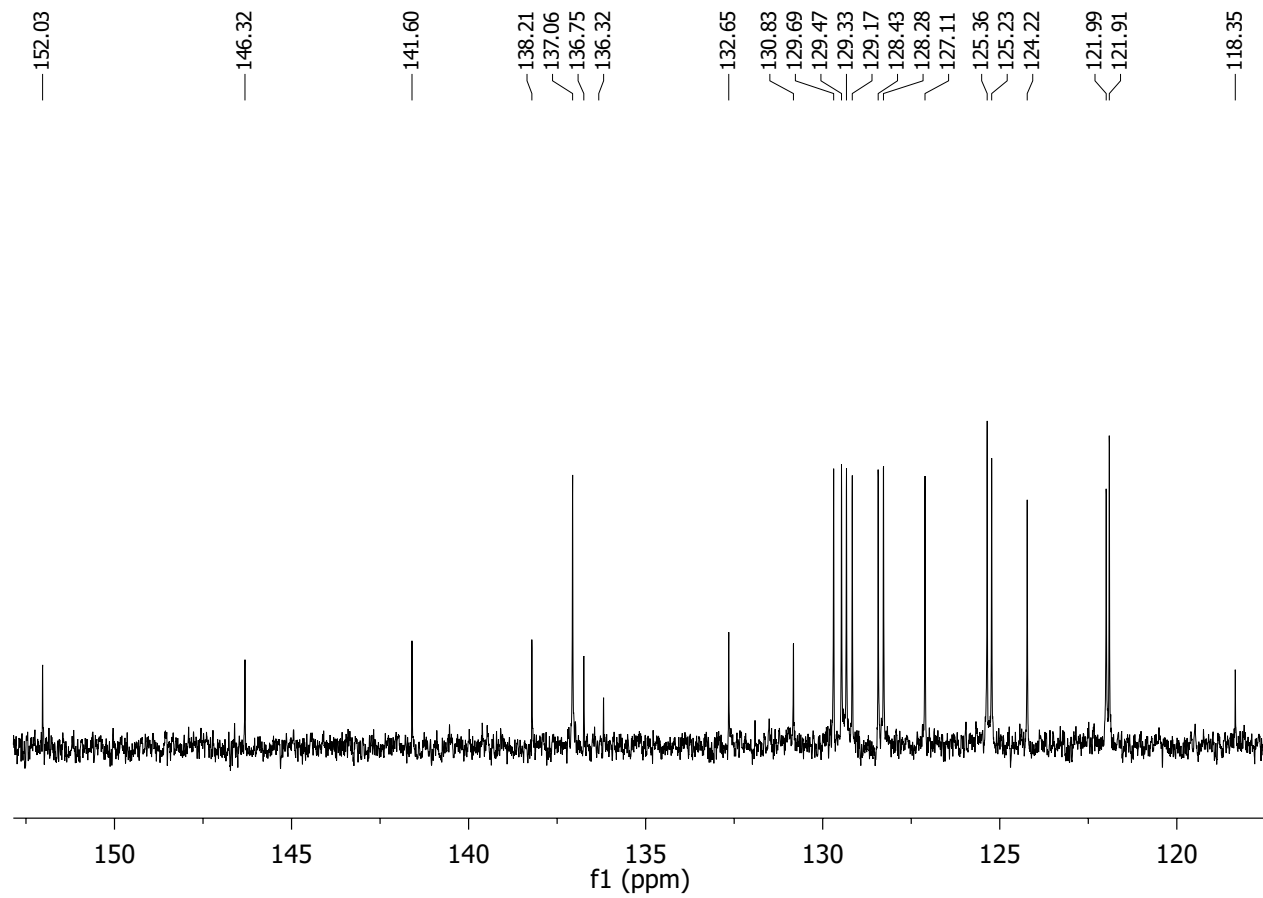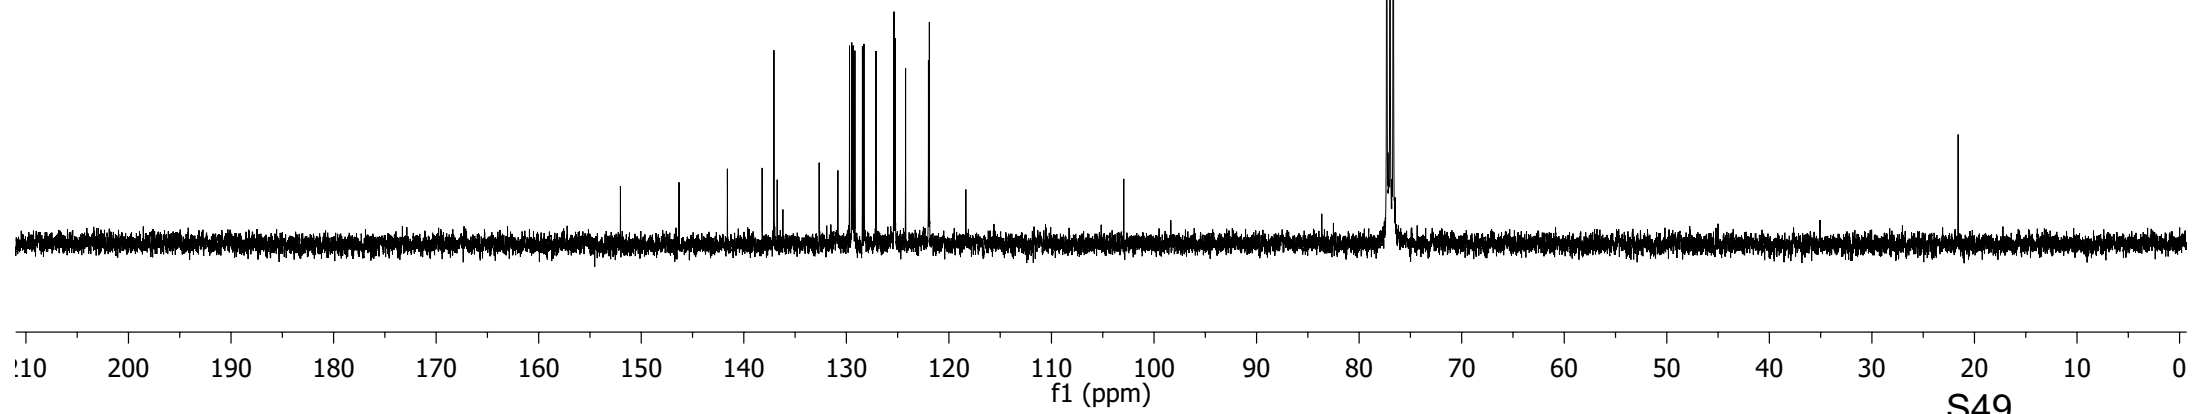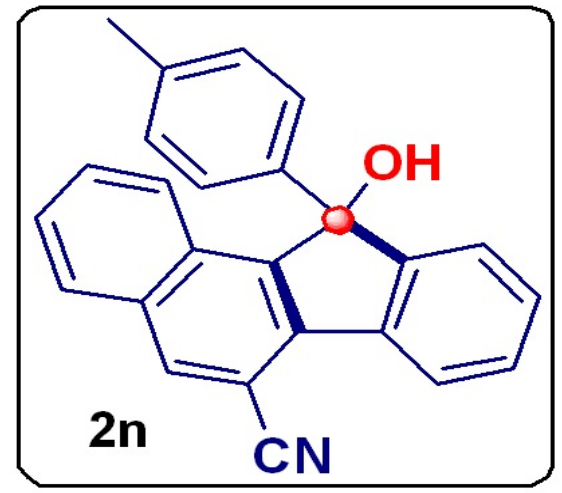

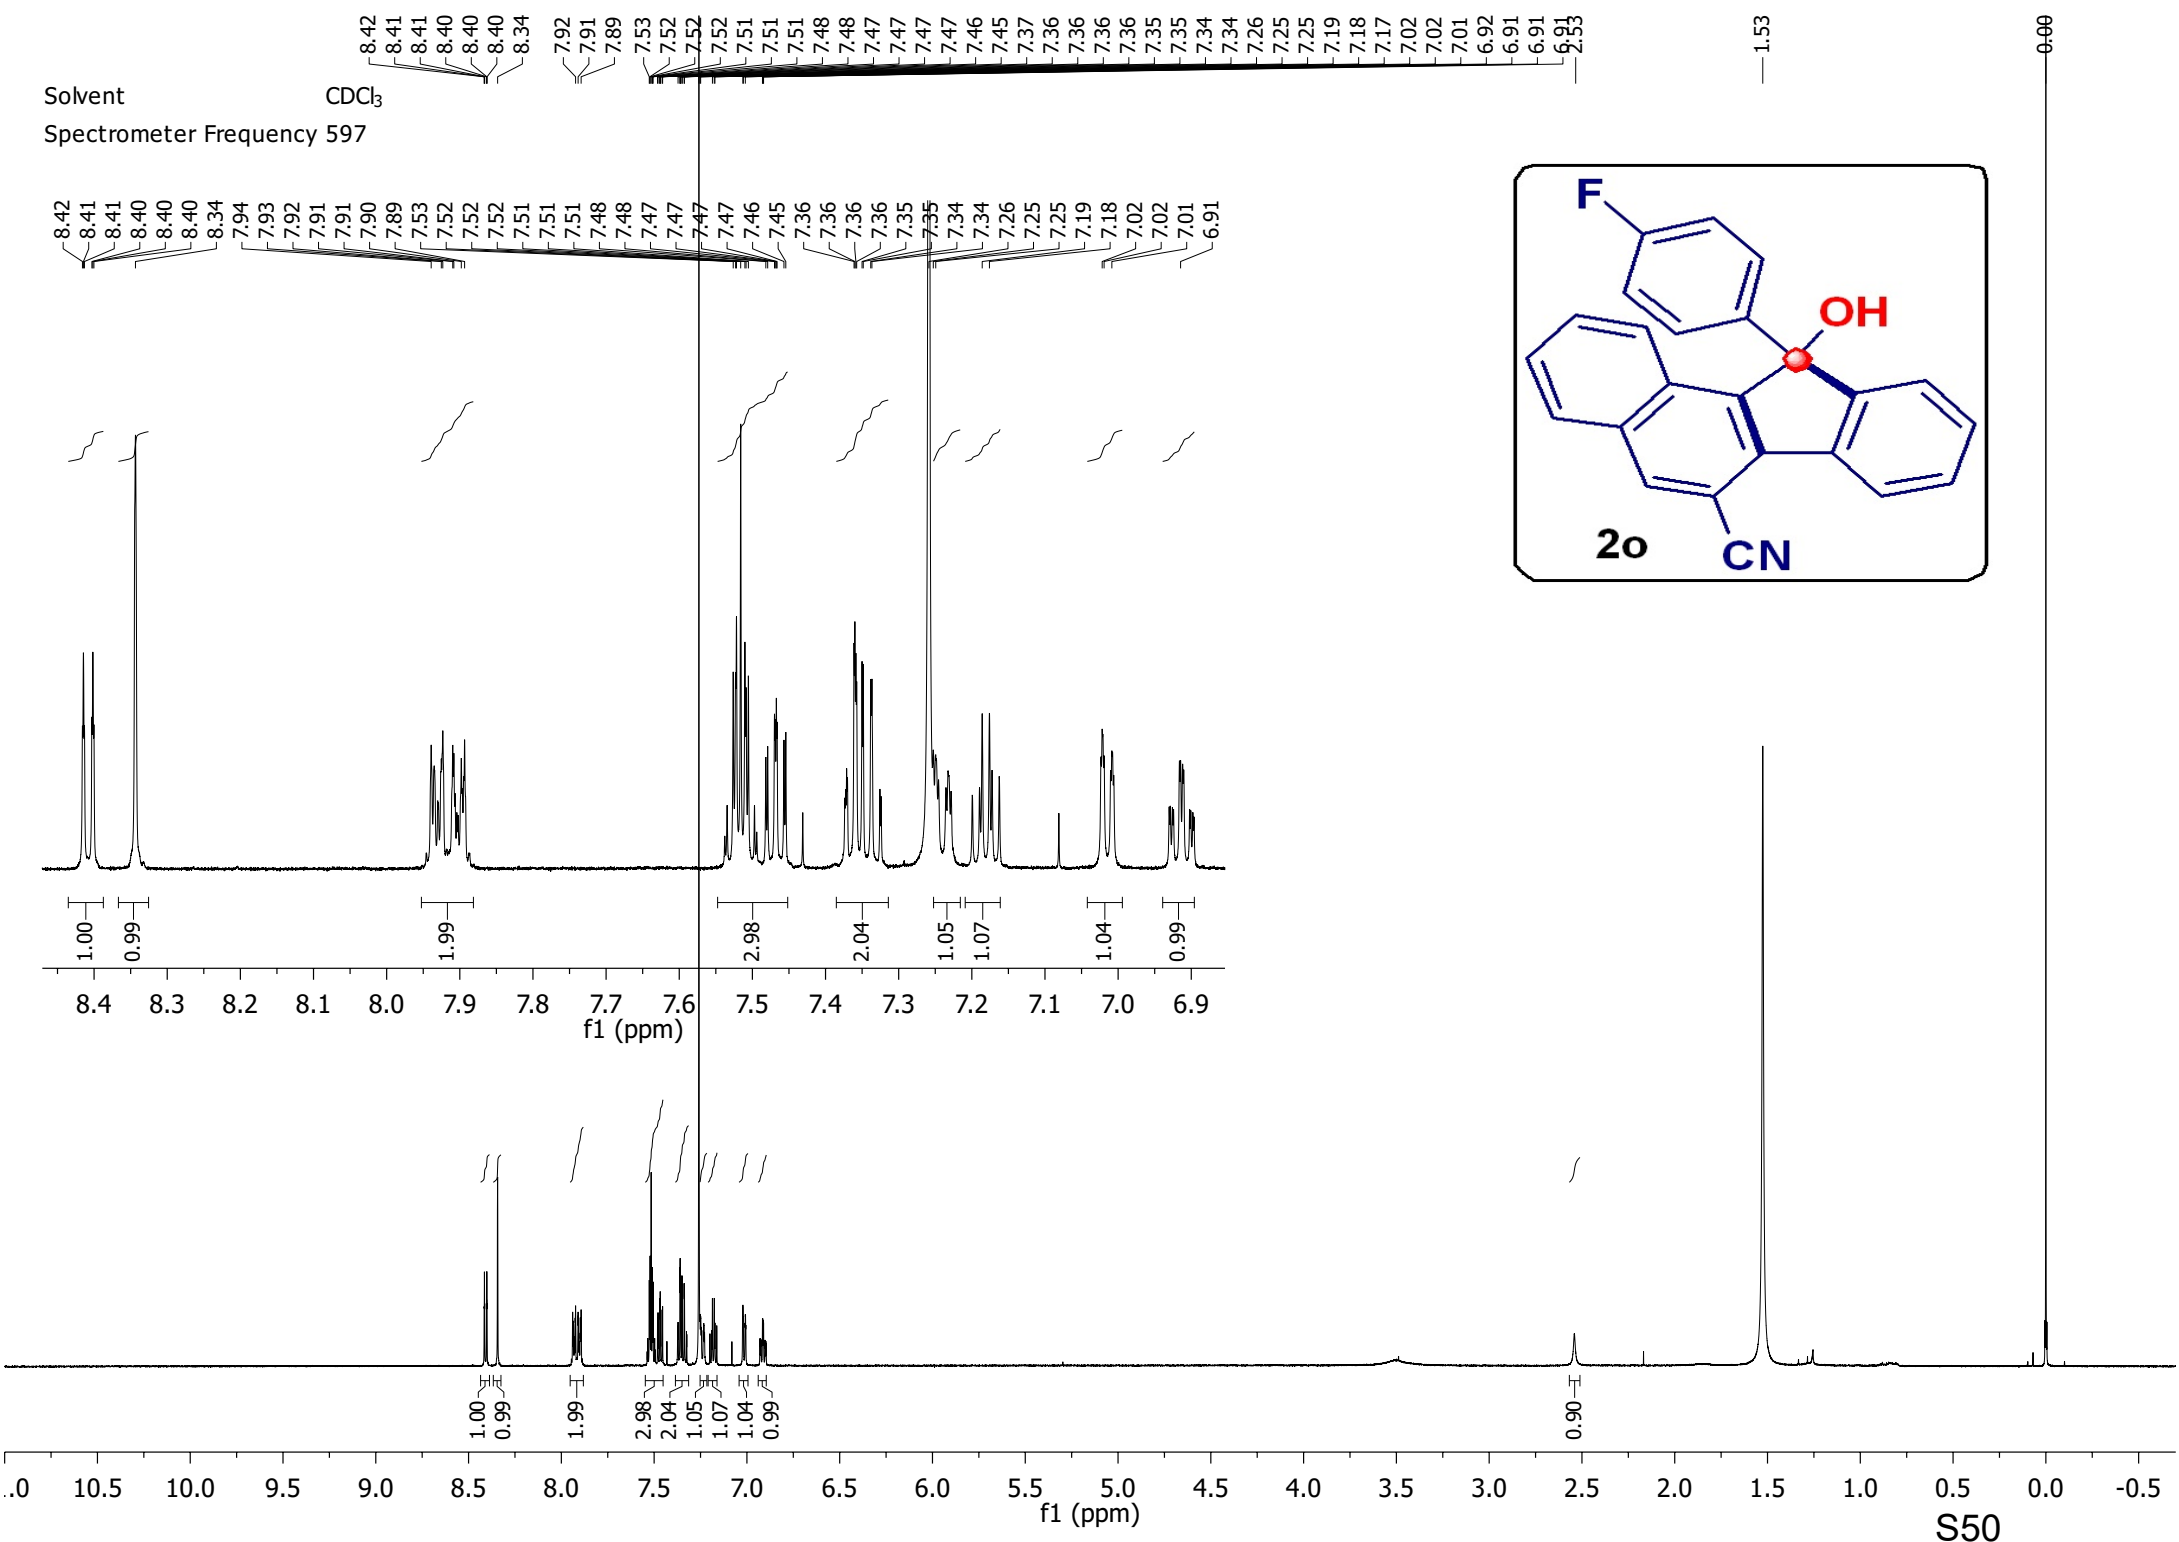

Solvent  $\text{CDCl}_3$   
Spectrometer Frequency 150

164.12  
162.32  
151.39  
145.72  
144.52  
137.31  
130.13  
129.87  
129.81  
129.45  
129.27  
127.28  
125.00  
124.19  
122.16  
120.58  
119.49  
114.35  
112.35  
103.04

164.12  
162.32

151.39

145.72  
144.52

137.31  
136.77  
136.25

132.72  
130.13

129.87  
129.81  
129.45  
129.27

127.28  
125.00  
124.19  
122.16

120.58  
119.49  
114.35  
112.35

112.20

103.04

83.18  
77.20  
76.99  
76.78

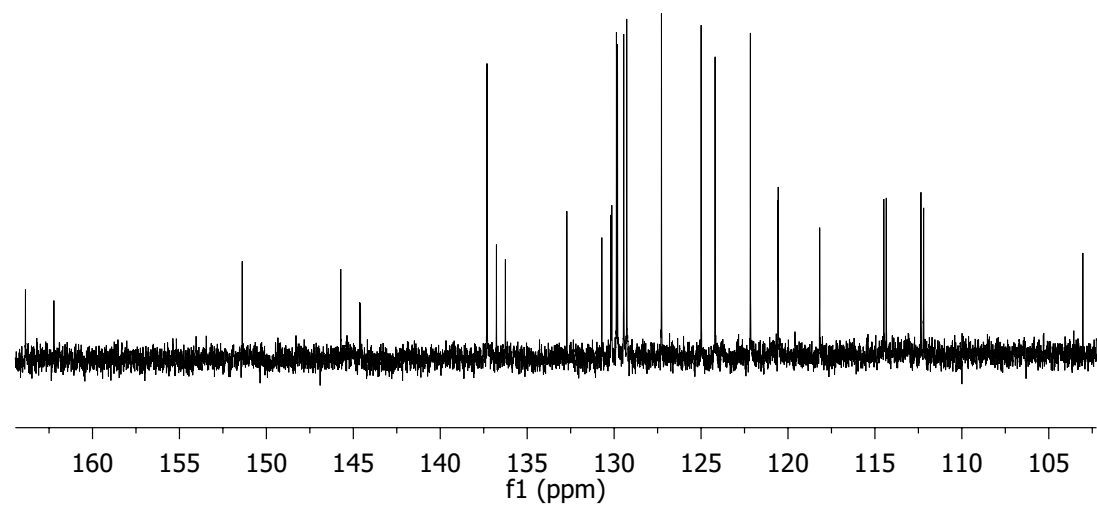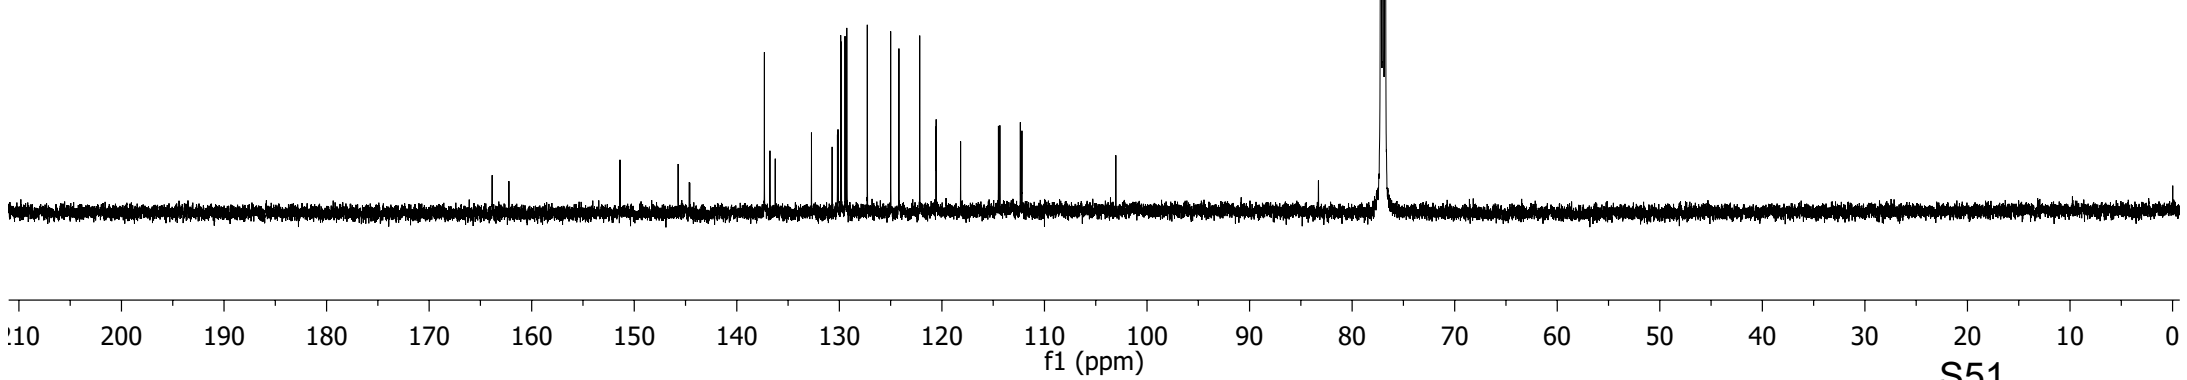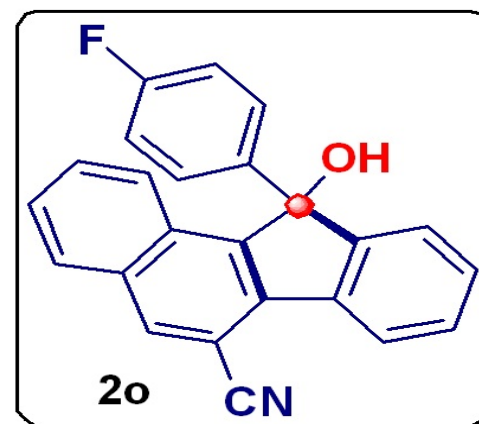

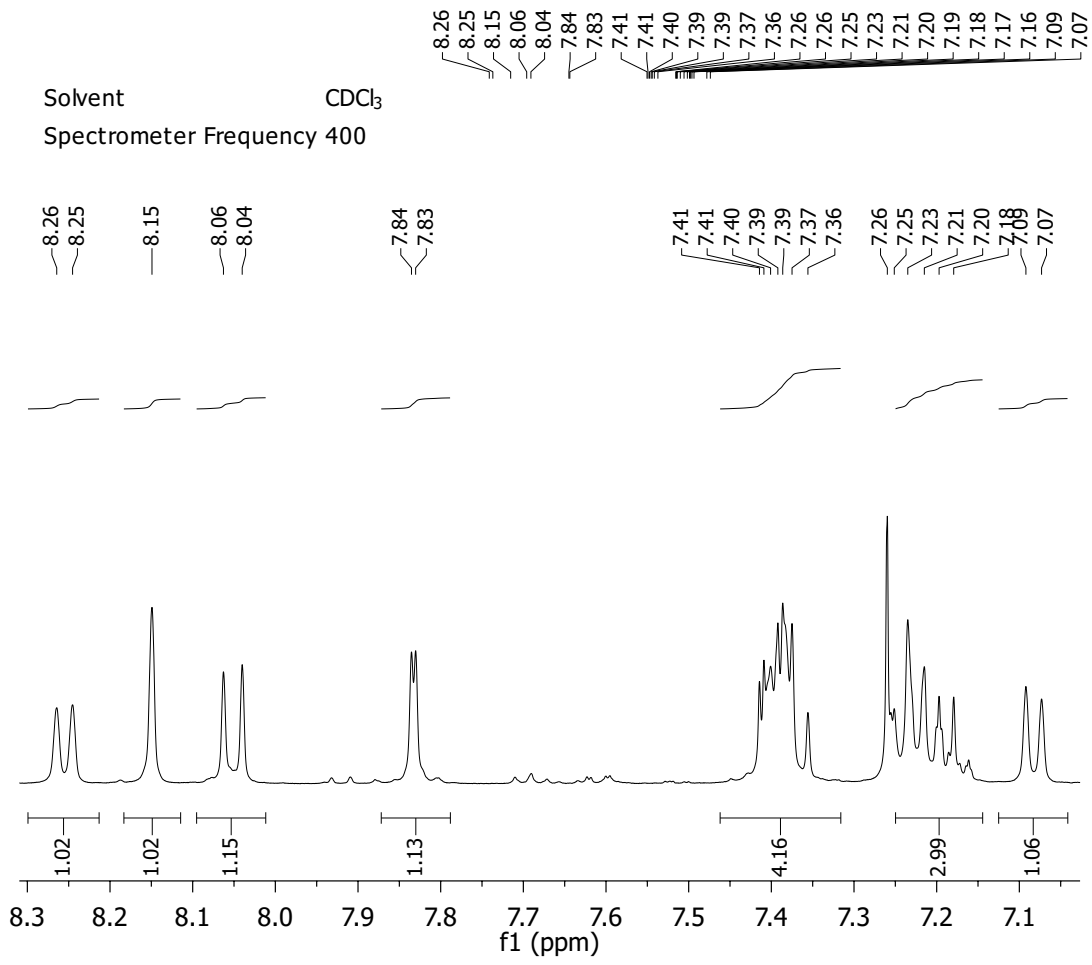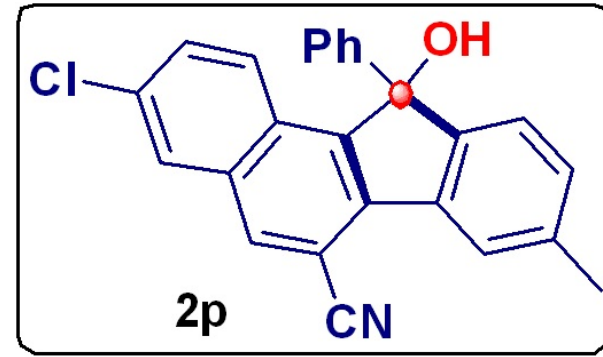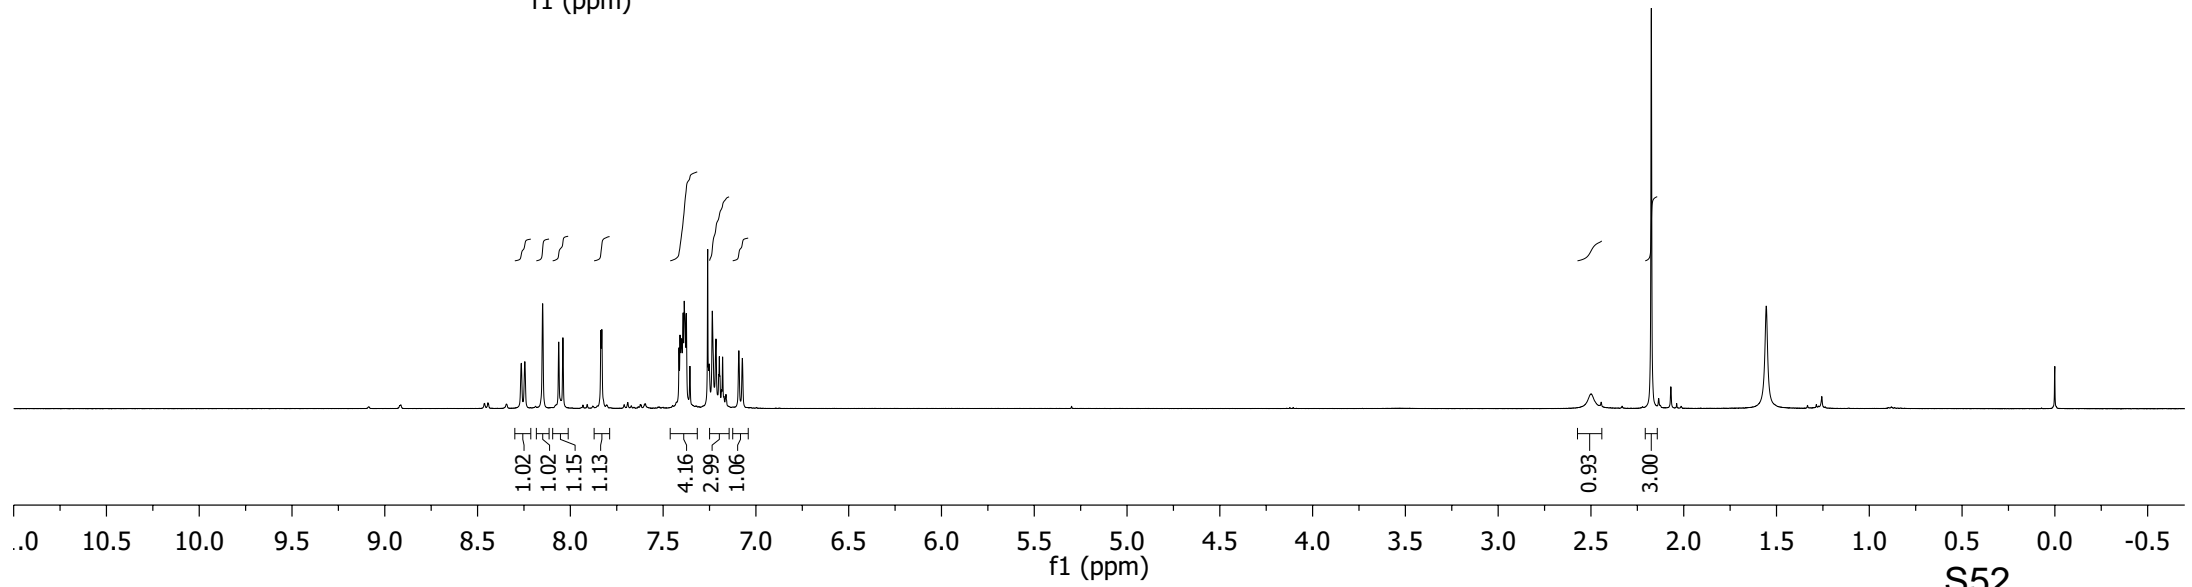

Solvent  $\text{CDCl}_3$   
Spectrometer Frequency 100

148.75  
147.36  
135.93  
131.89  
130.48  
129.92  
128.25  
127.60  
127.11  
126.25  
119.51  
118.04

104.00

84.47  
77.32  
77.00  
76.68

17.49

148.75

147.36

139.98

137.11

137.07

135.93

135.79

133.17

133.07

131.89

130.48

129.92

128.71

128.68

128.25

127.60

127.11

126.25

125.53

119.51

118.04

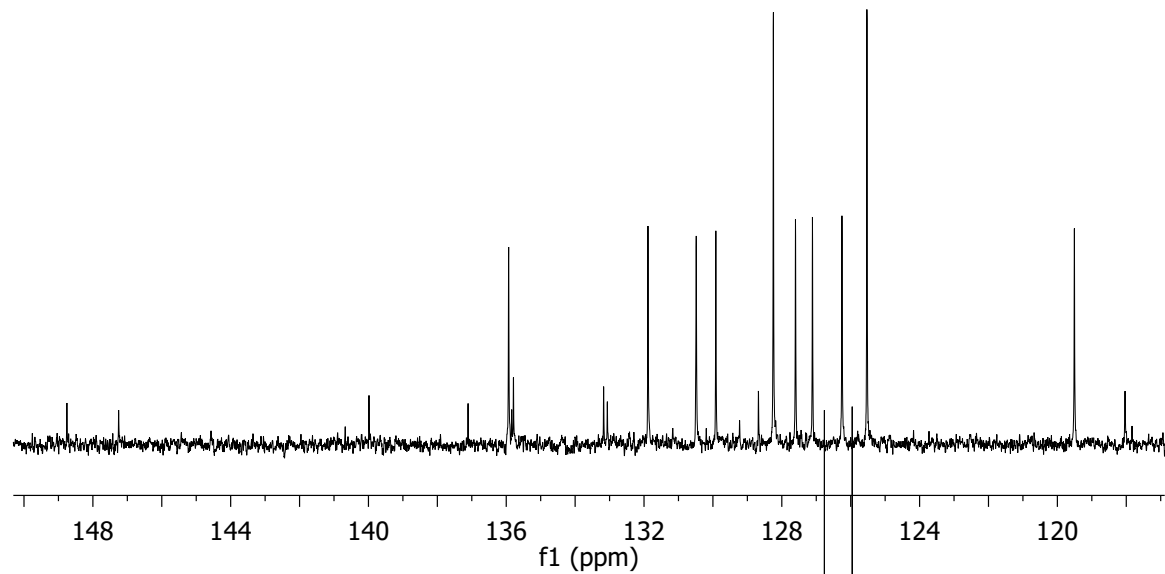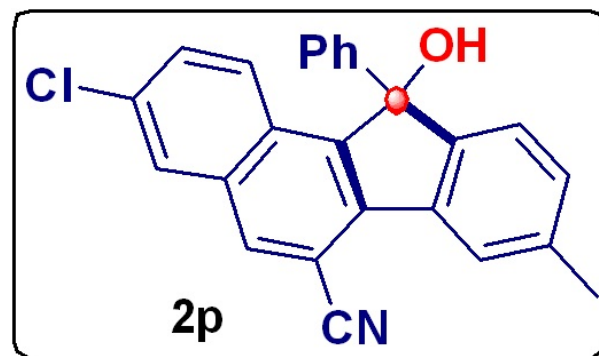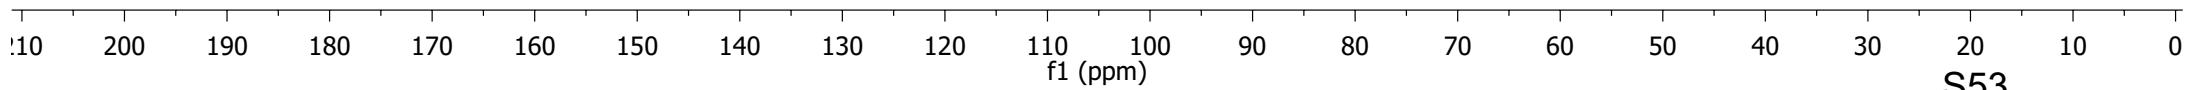

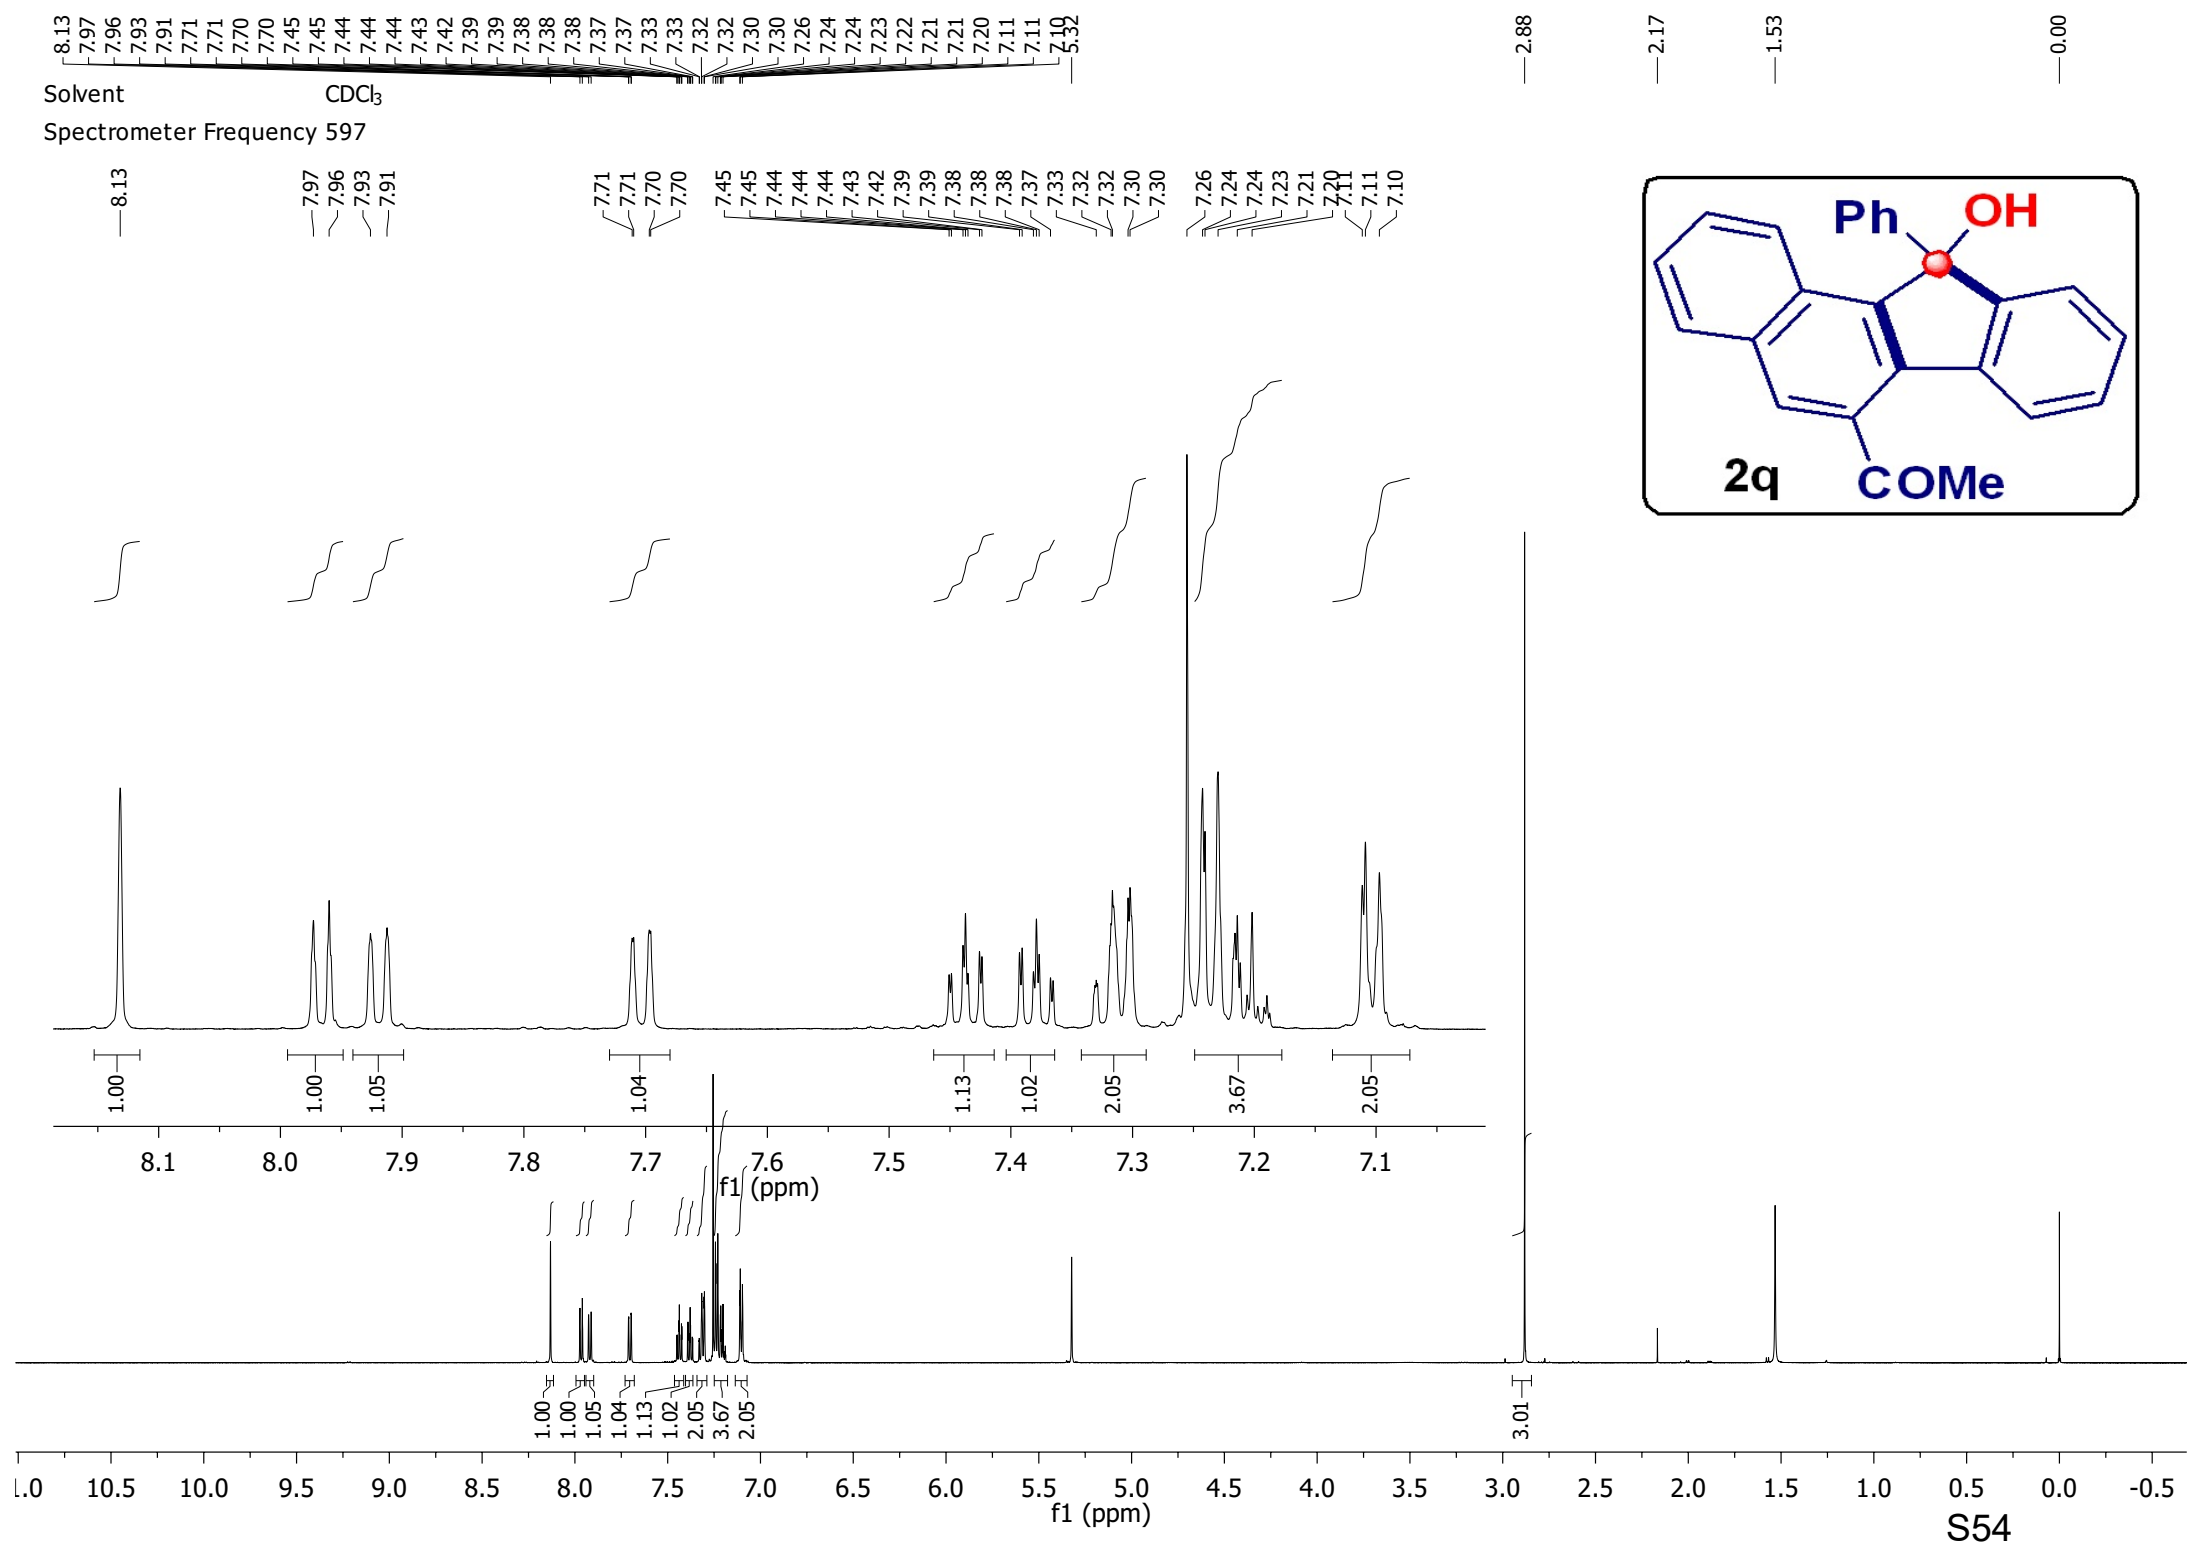

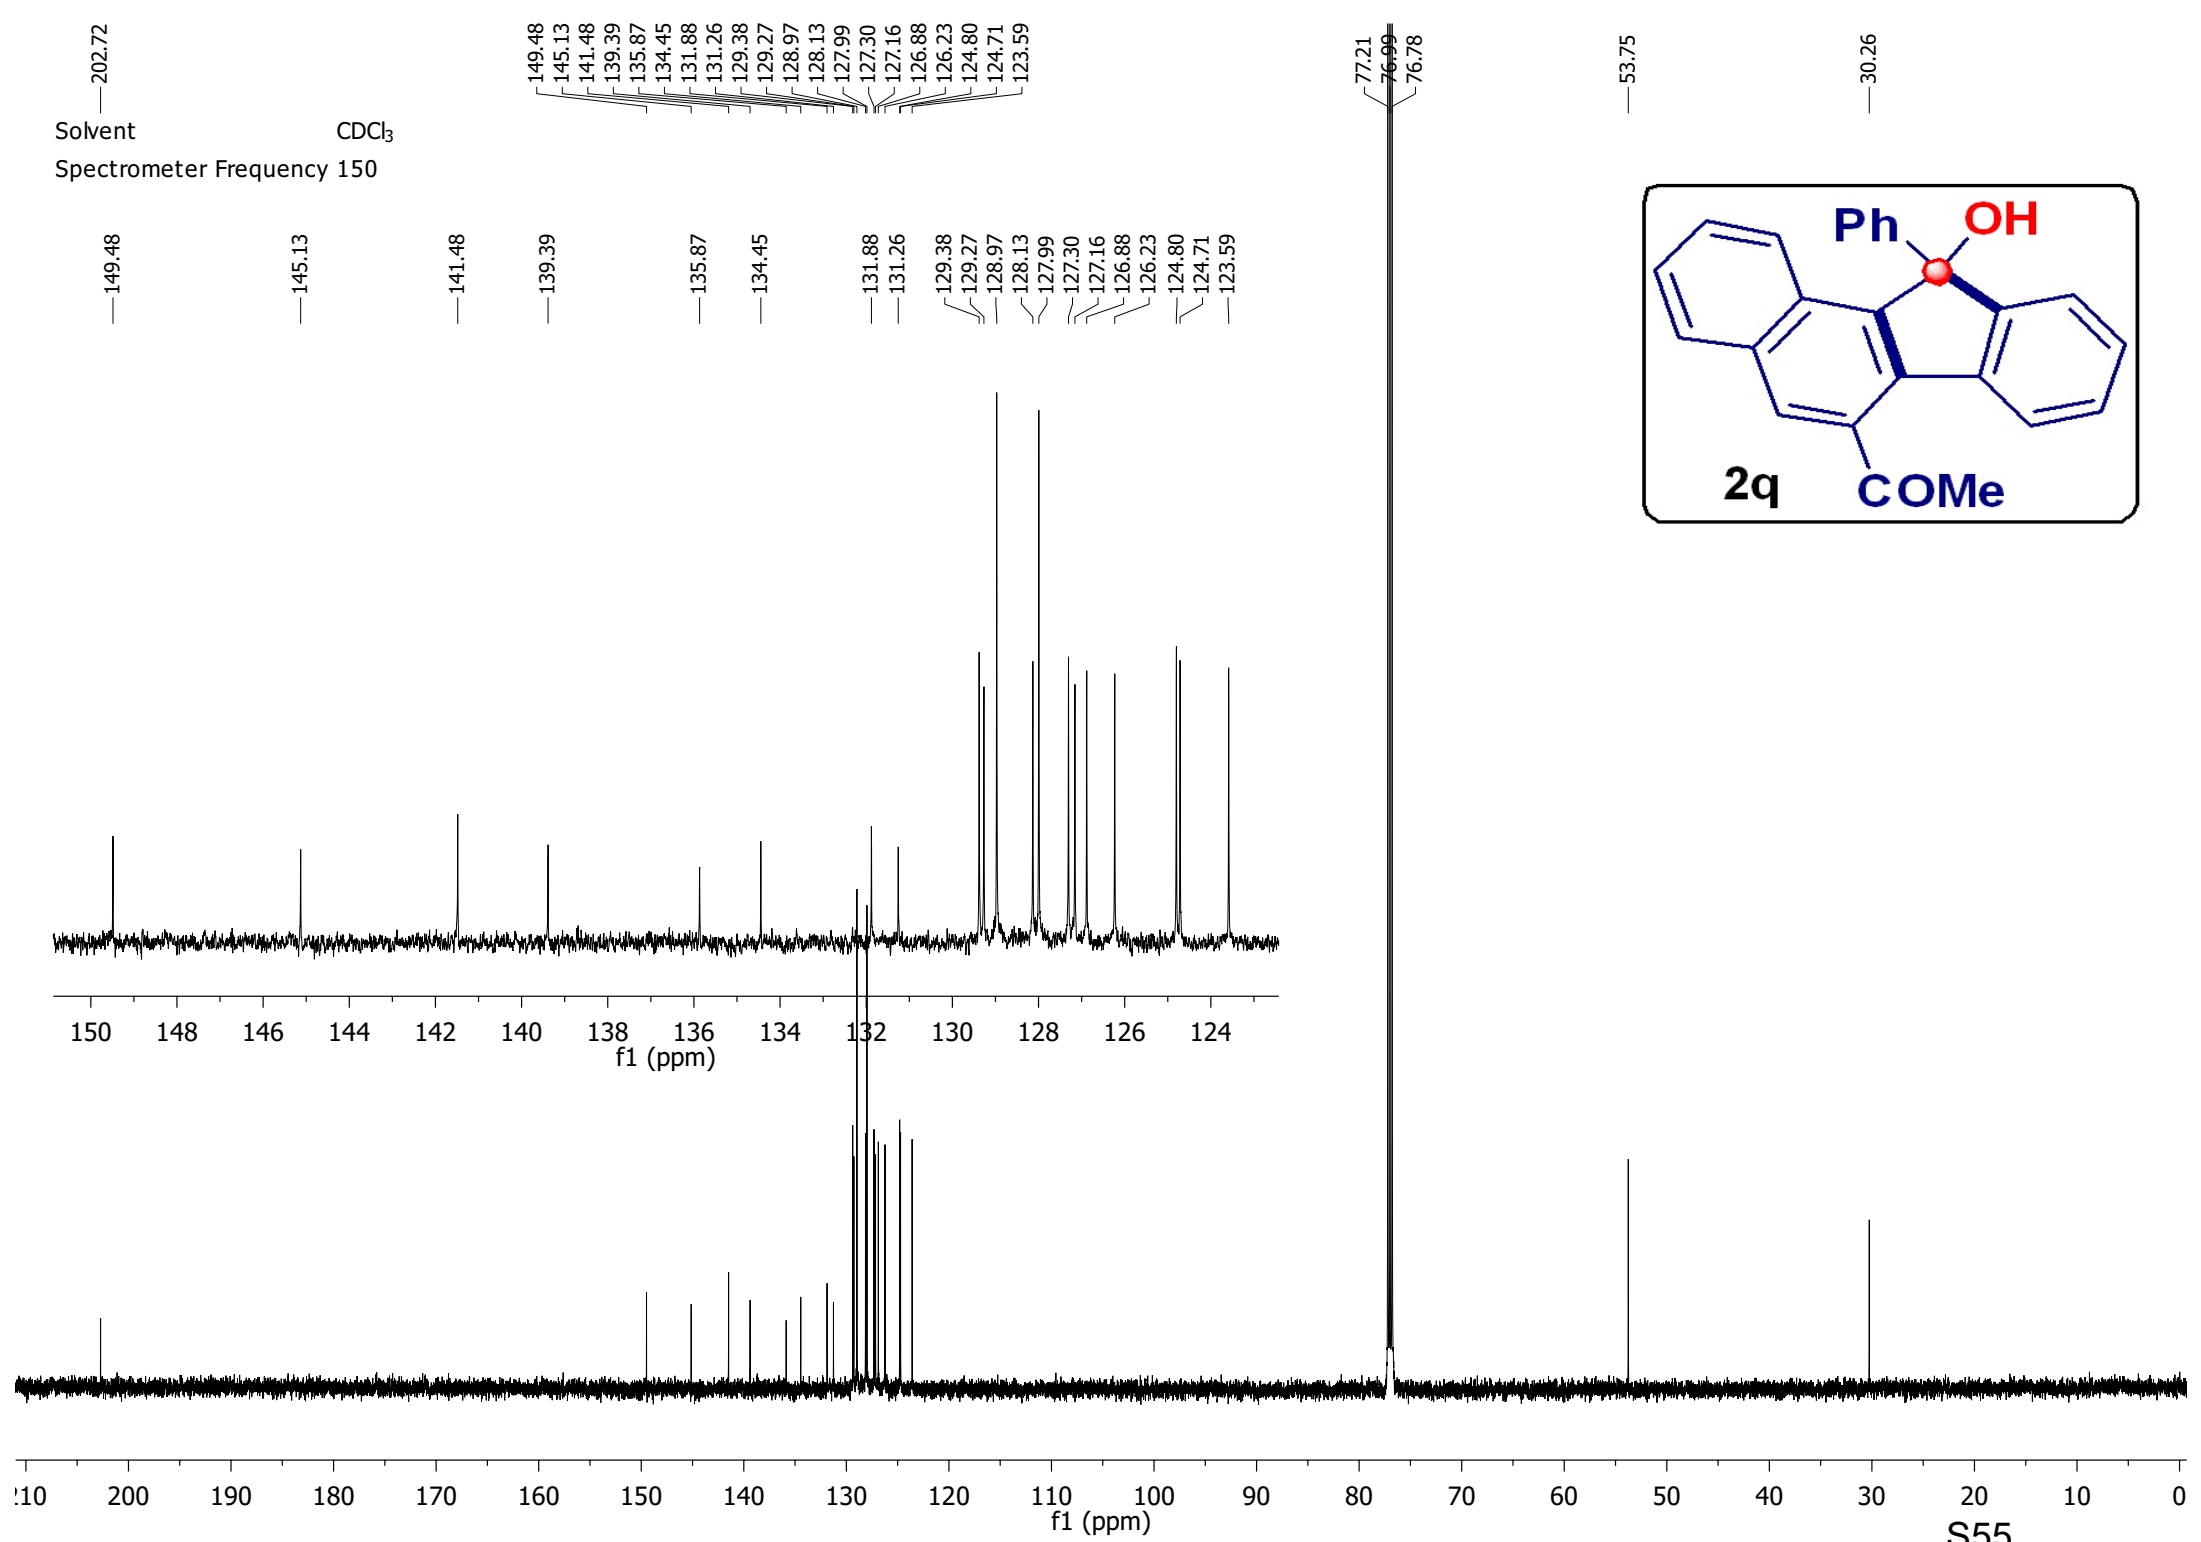

Solvent  $\text{CDCl}_3$   
Spectrometer Frequency 400

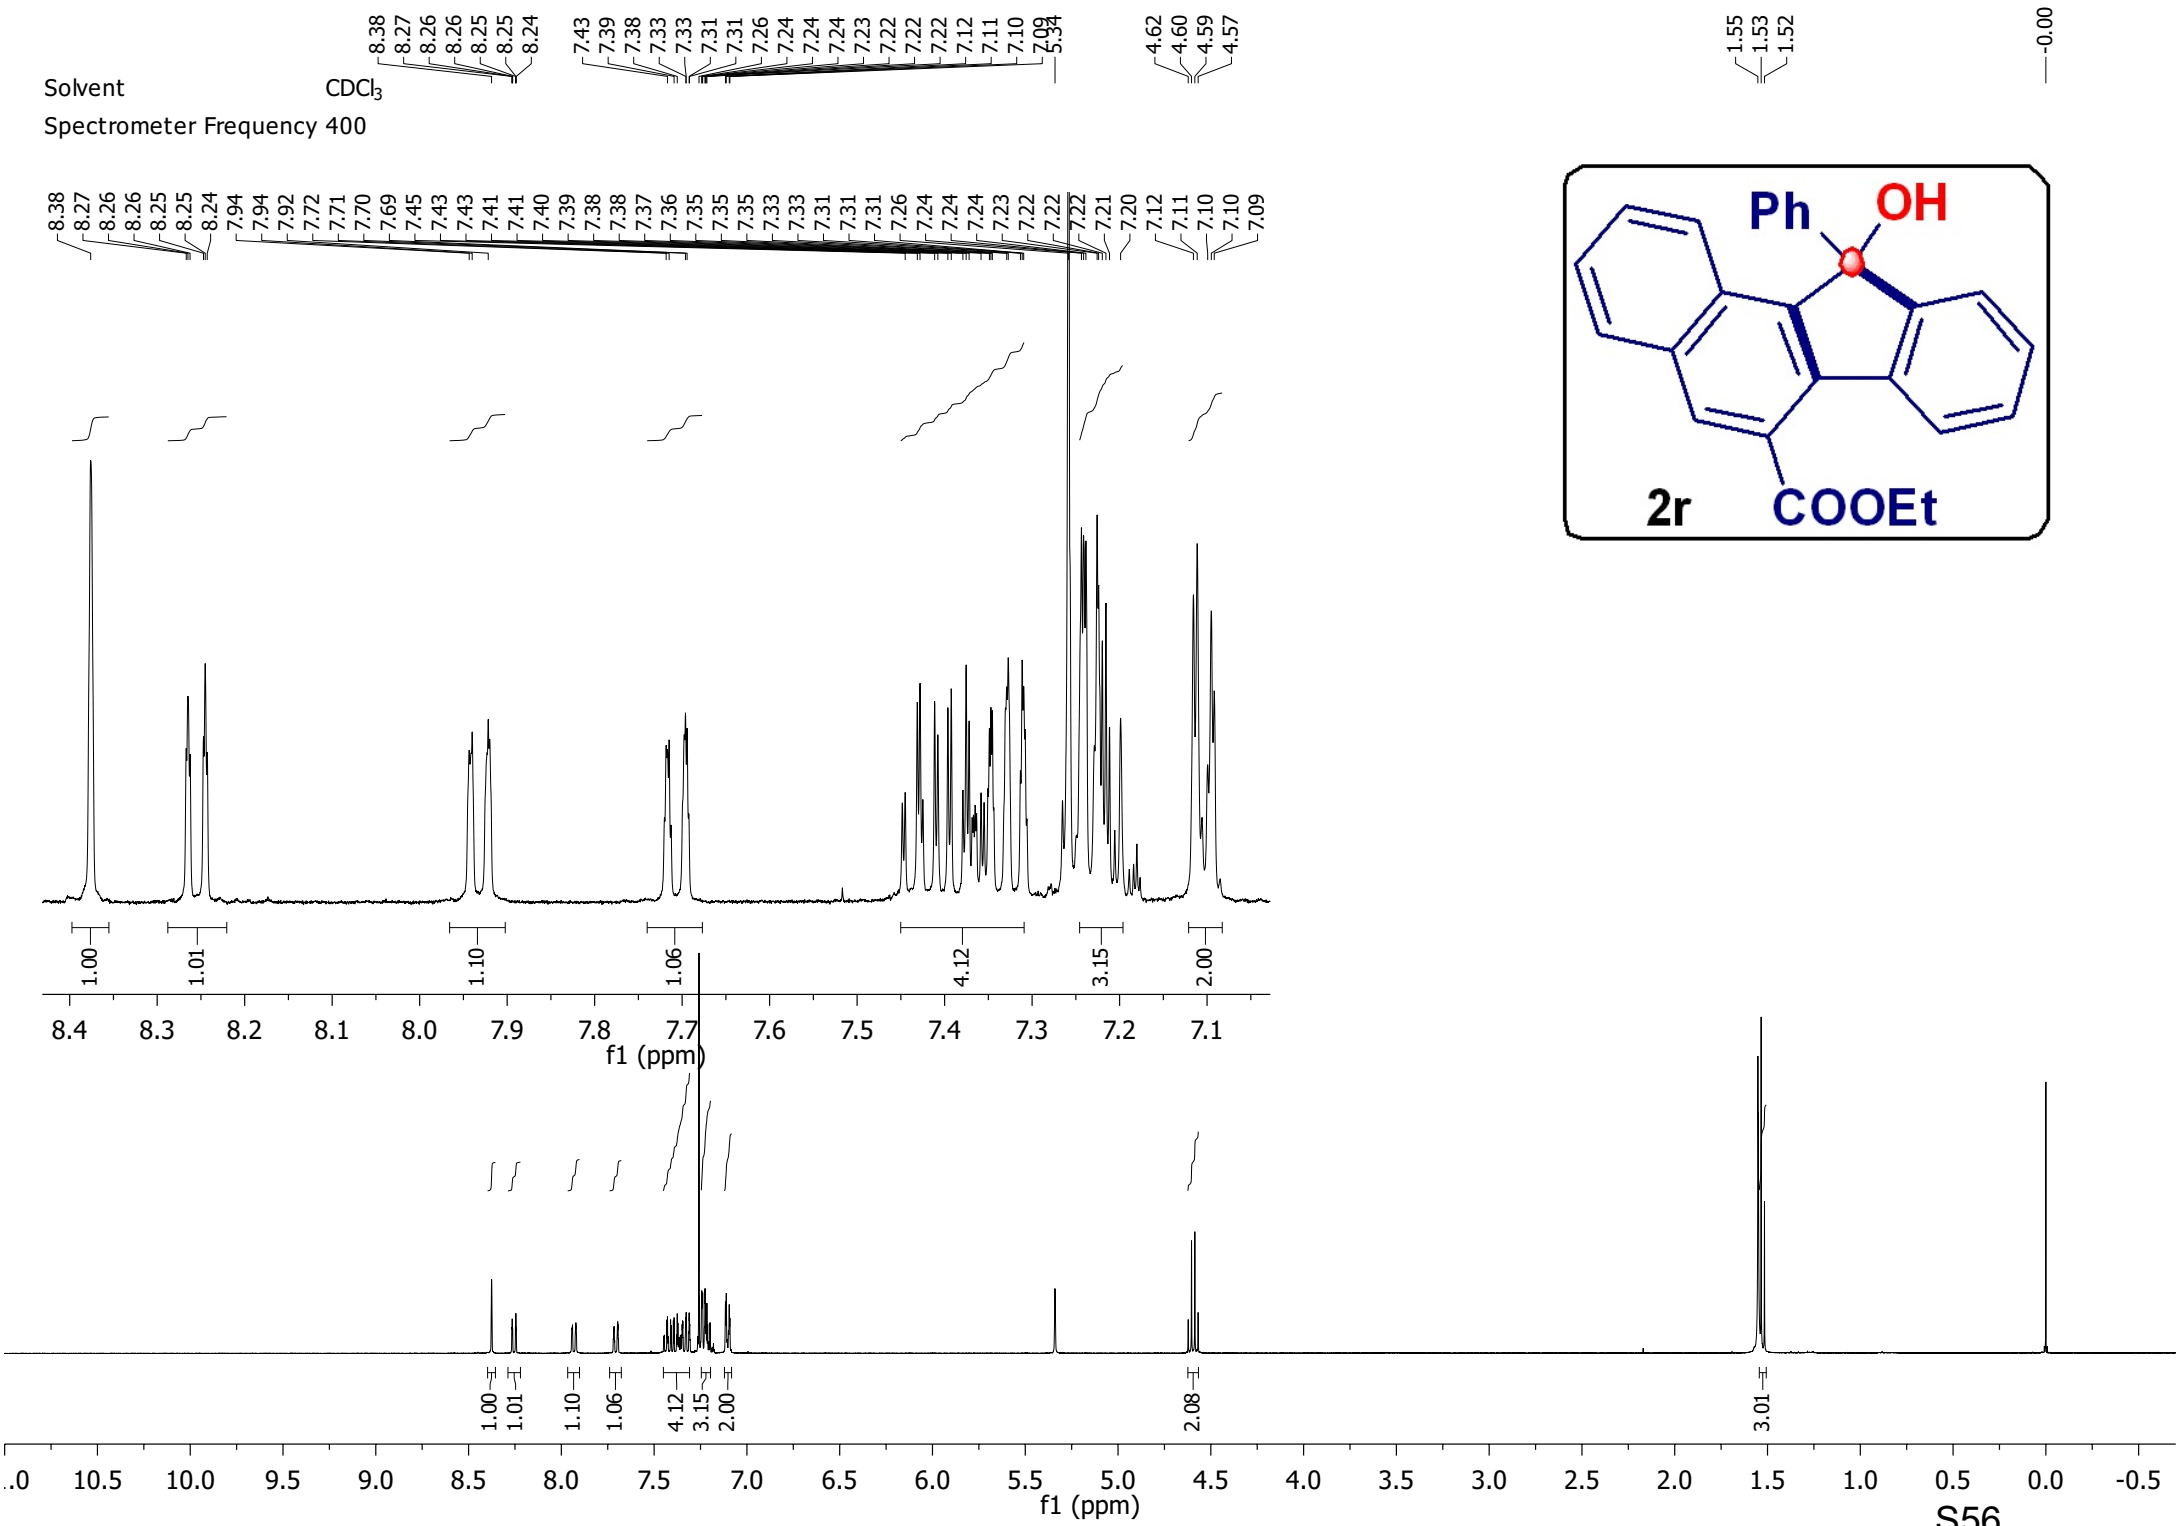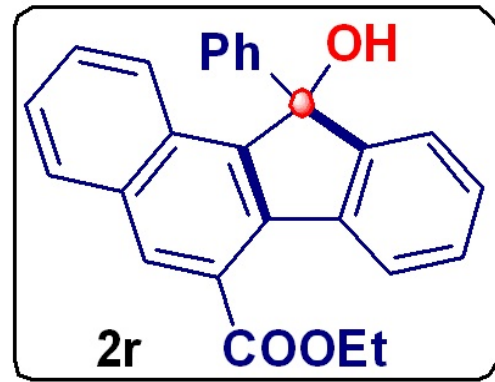



Solvent  $\text{CDCl}_3$   
Spectrometer Frequency 100

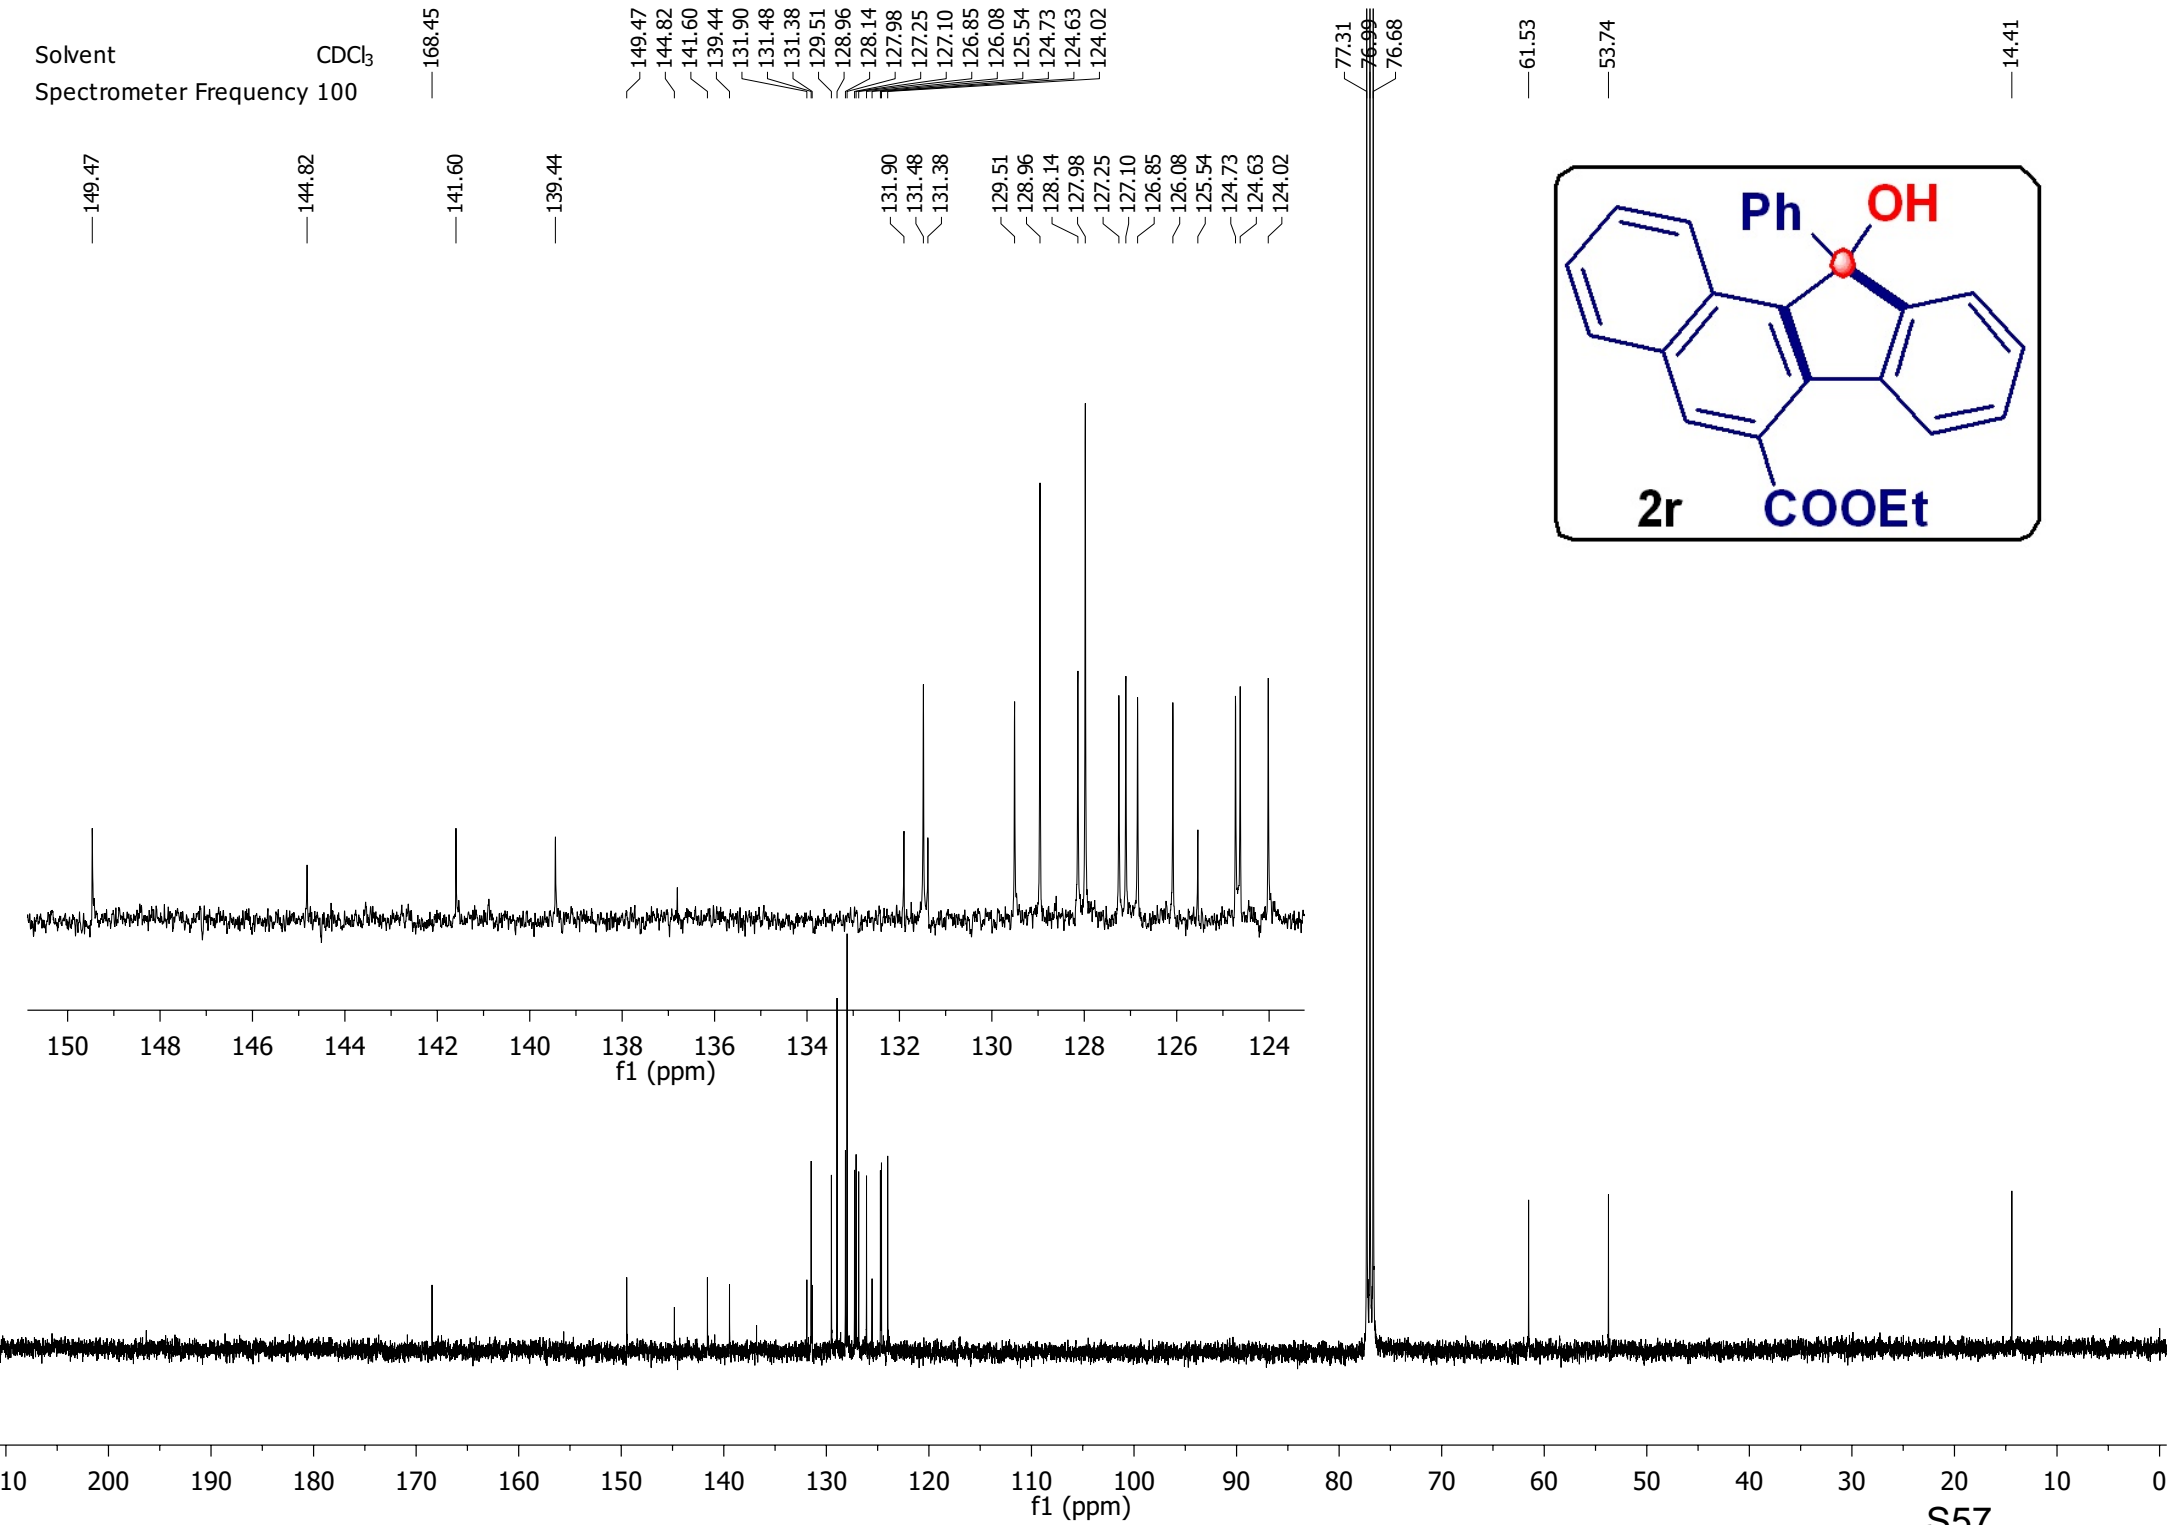

Solvent  $\text{CDCl}_3$   
Spectrometer Frequency 400

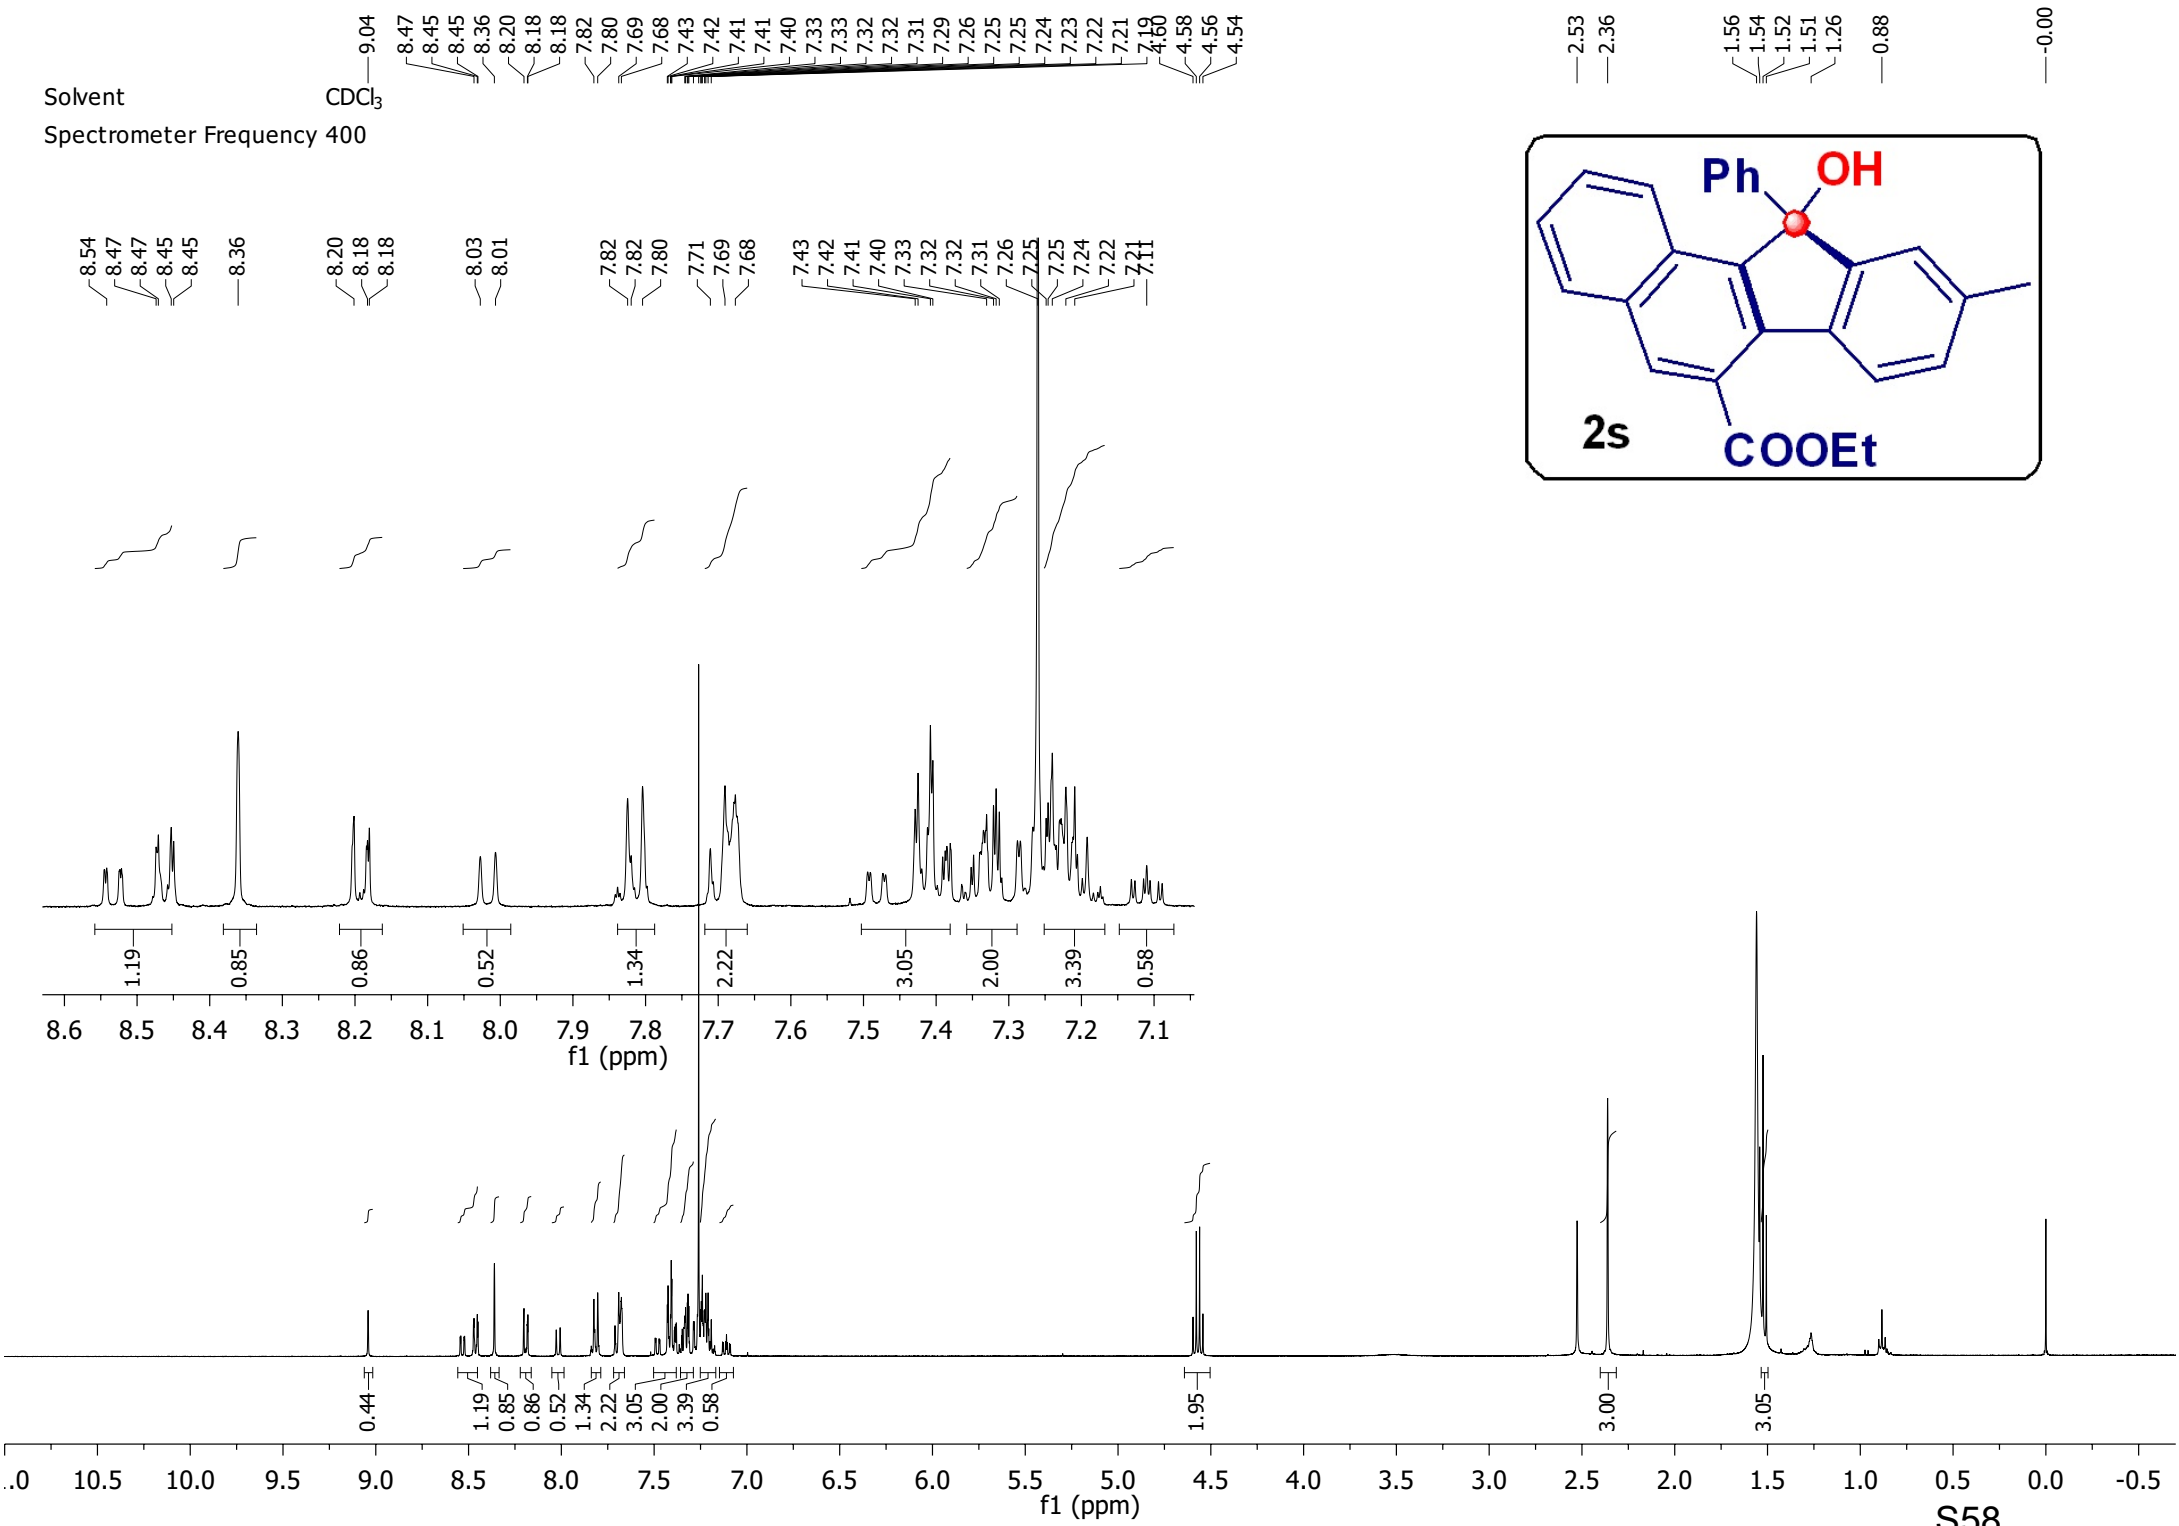

Solvent CDCl<sub>3</sub>  
Spectrometer Frequency 100

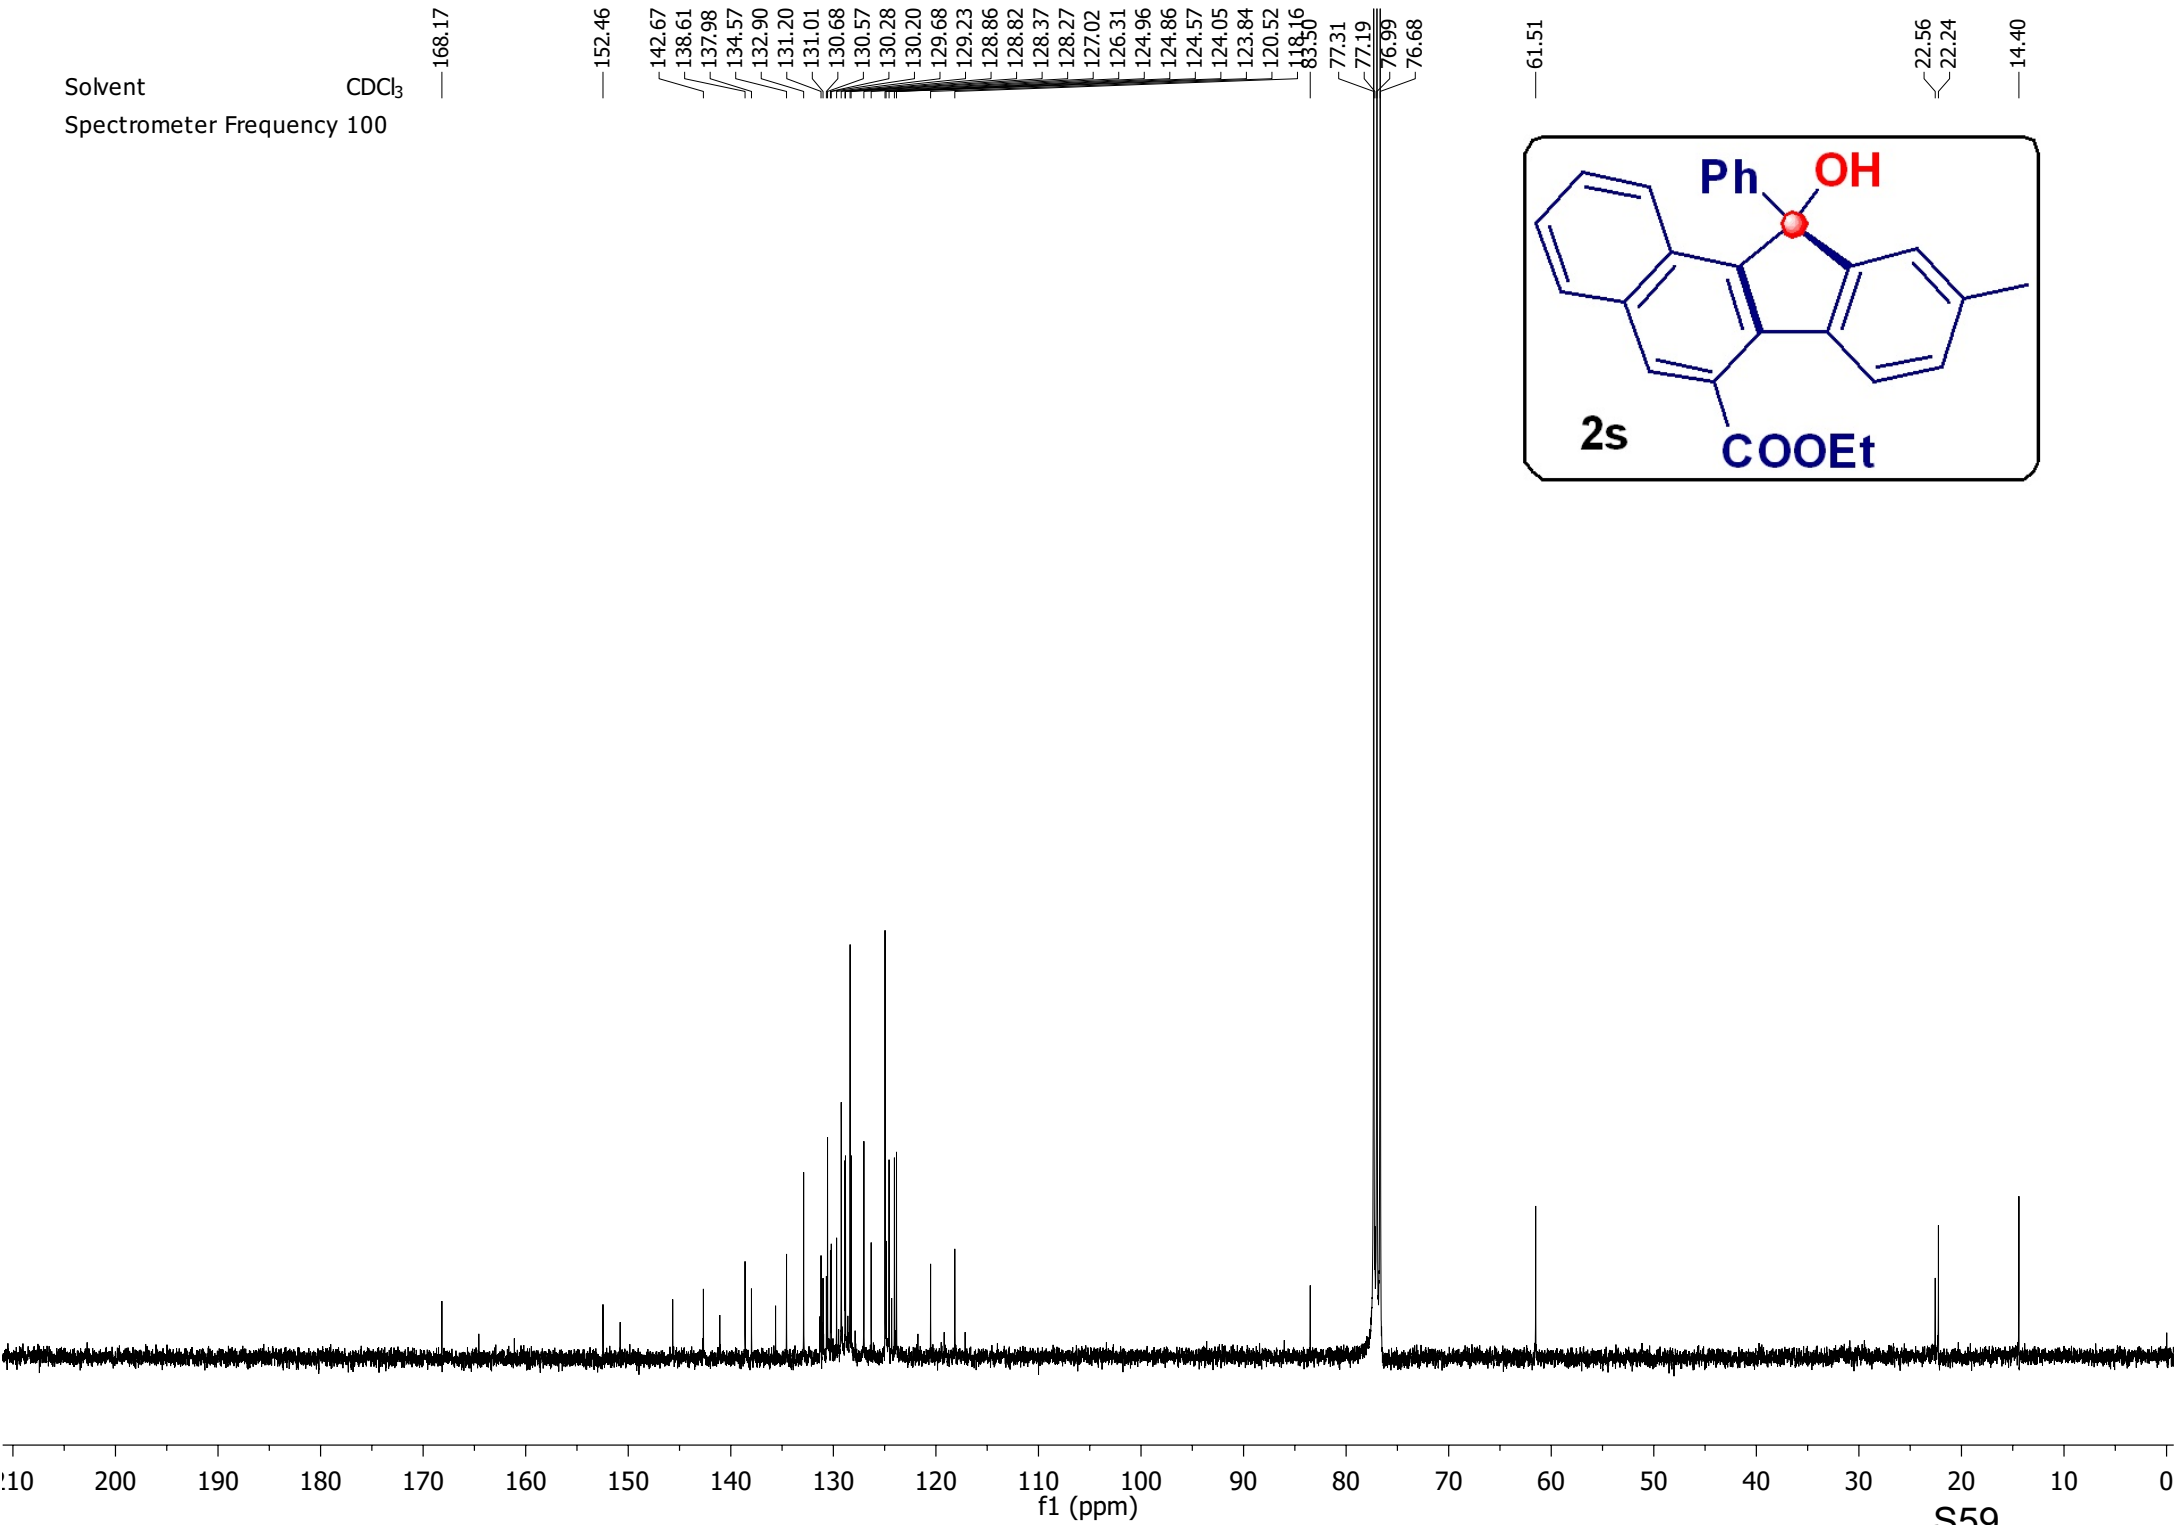

Solvent  $\text{CDCl}_3$   
Spectrometer Frequency 400

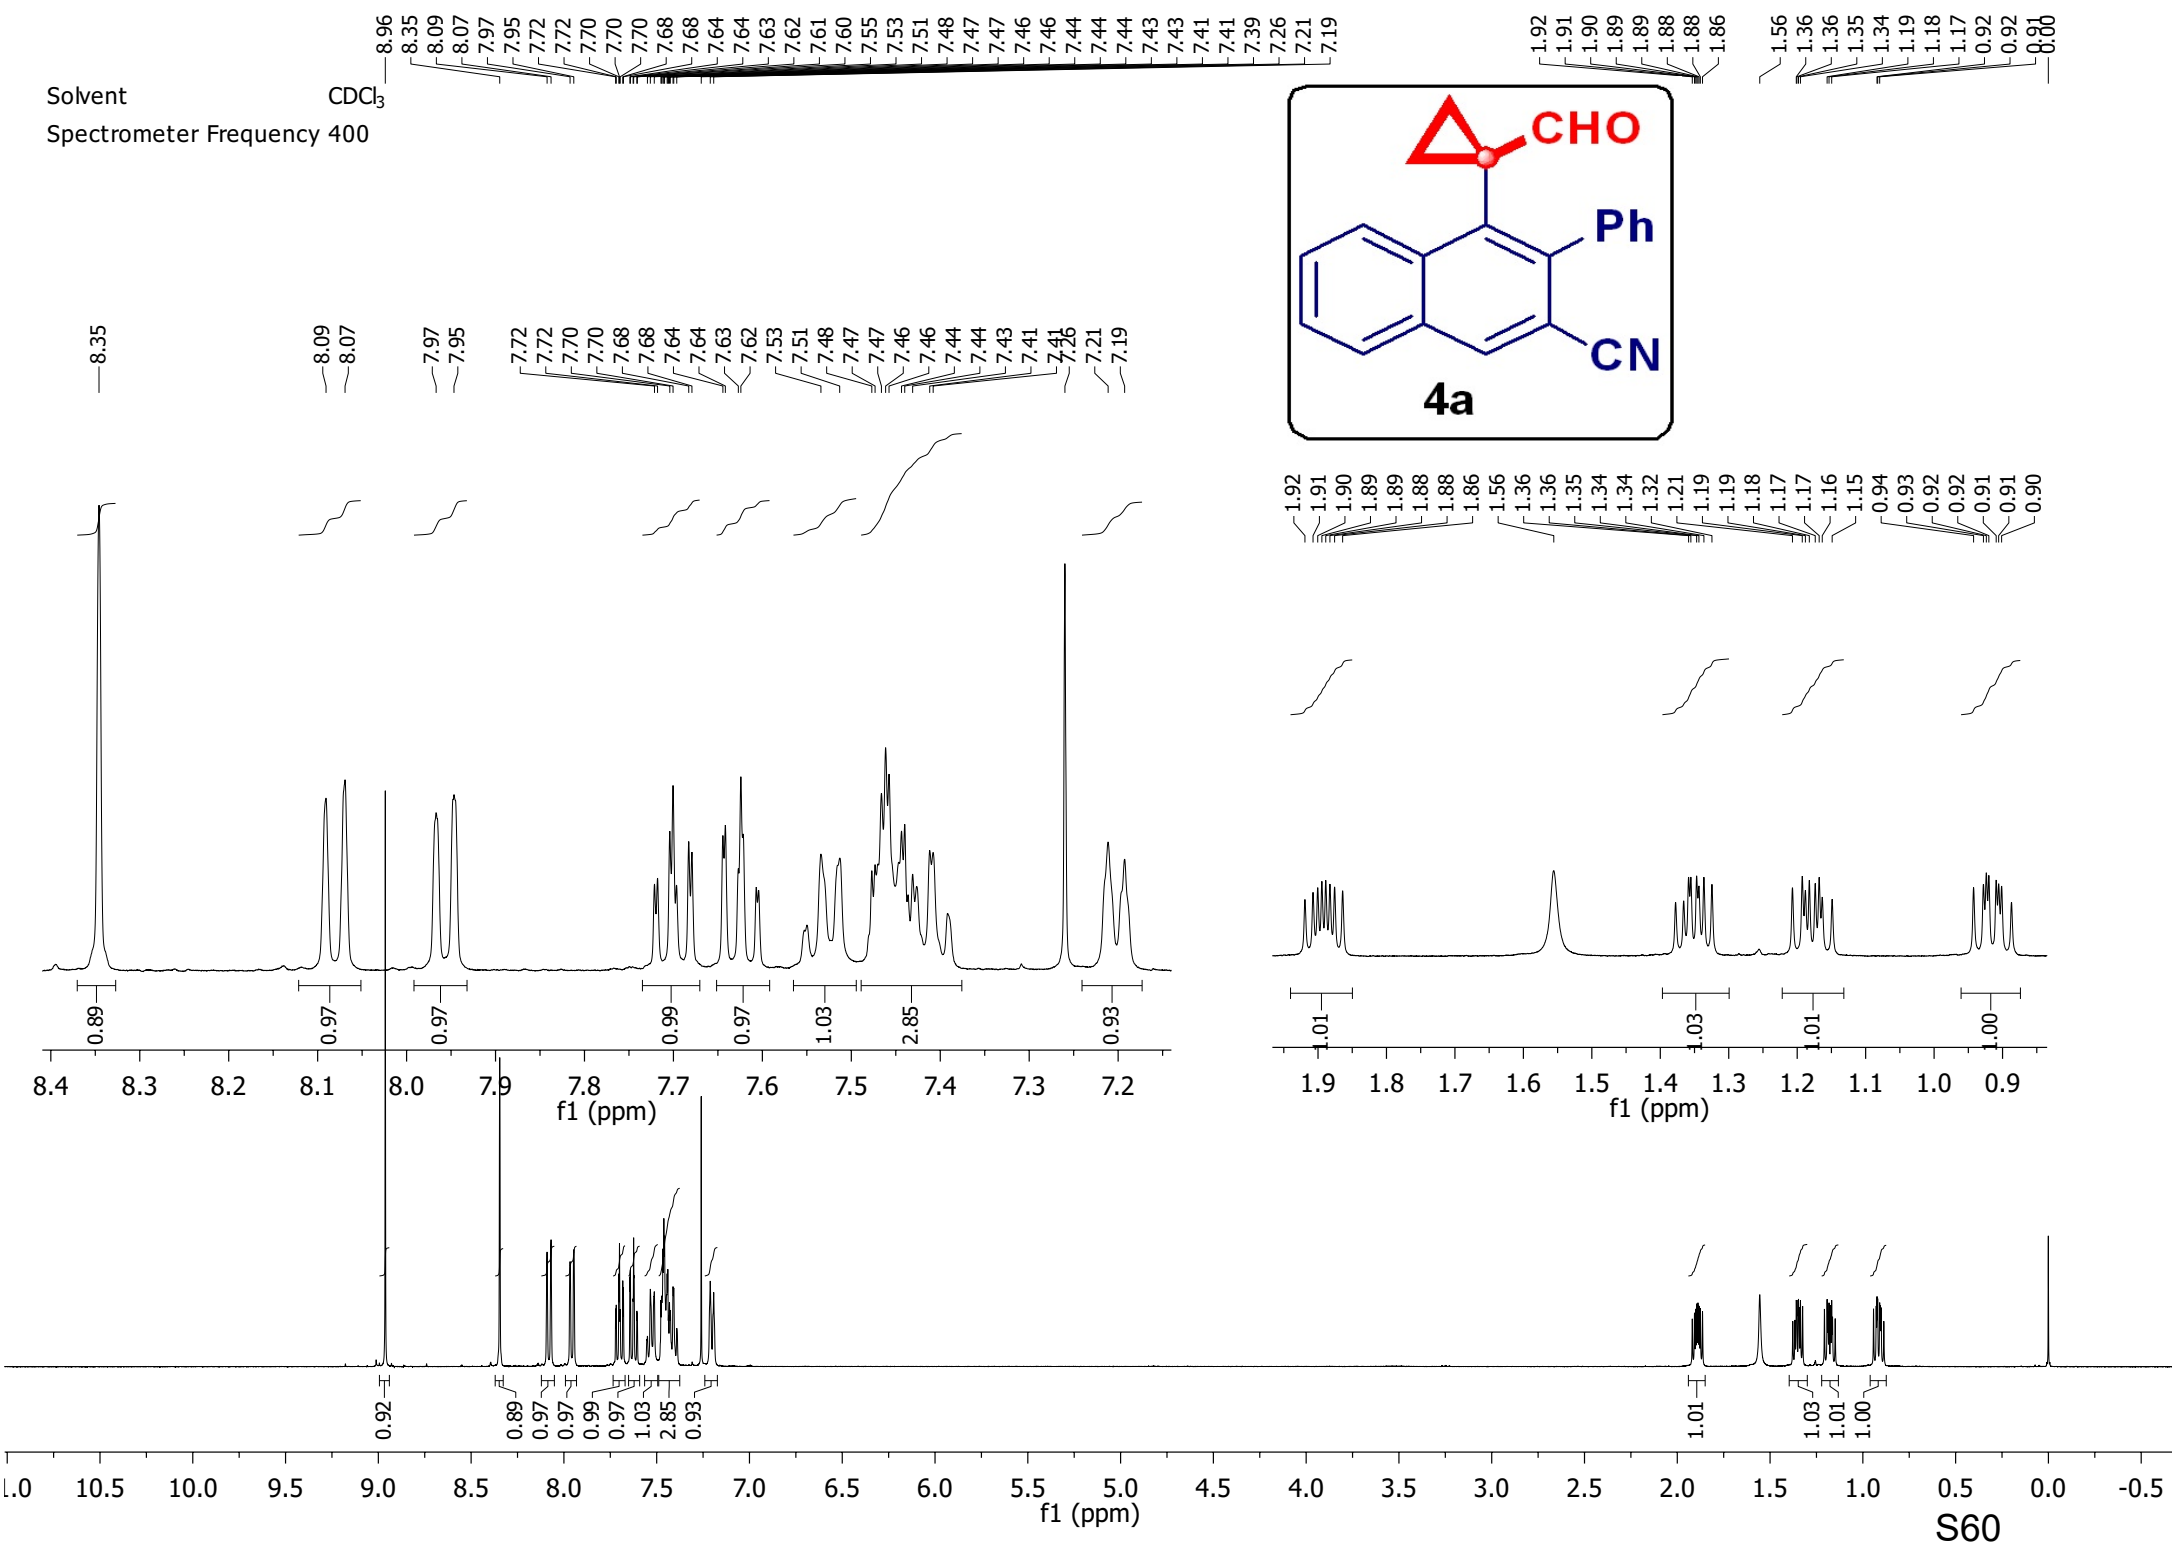

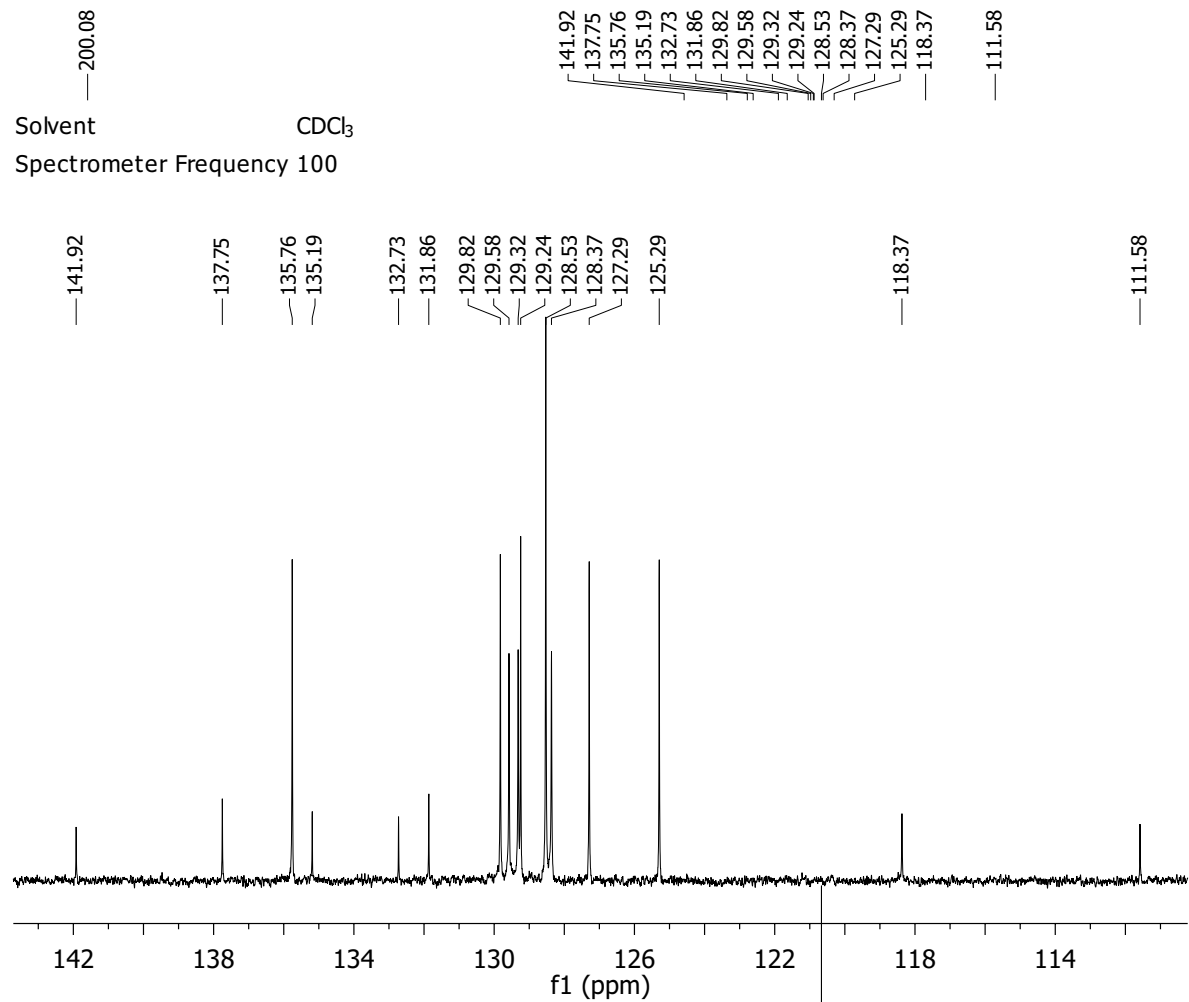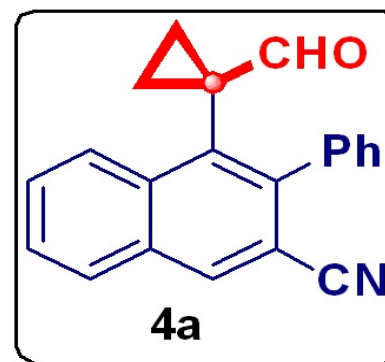

77.31  
76.99  
76.68

34.21

19.27  
17.41

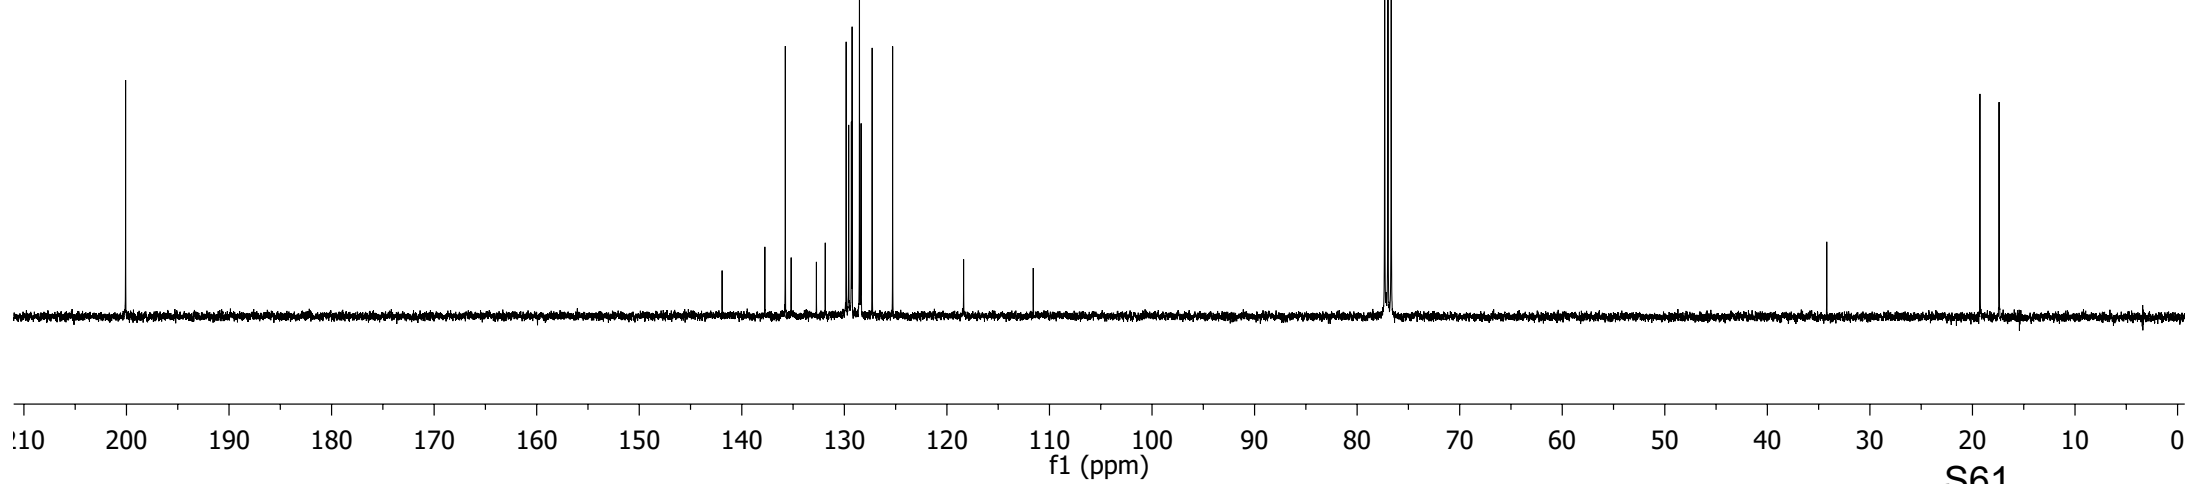

Solvent DMSO-d<sub>6</sub> + CDCl<sub>3</sub>  
Spectrometer Frequency 400

8.85  
8.12  
7.51  
7.49  
7.48  
7.44  
7.44  
7.43  
7.42  
7.42  
7.41  
7.39  
7.34  
7.22  
7.15  
6.14

4.66  
2.96  
2.92  
1.89  
1.88  
1.87  
1.87  
1.86  
1.85  
1.31  
1.31  
1.30  
1.29  
1.29  
1.28  
1.16  
1.16  
0.90  
0.89  
0.89  
0.88  
0.88

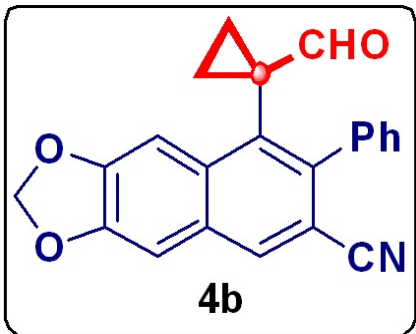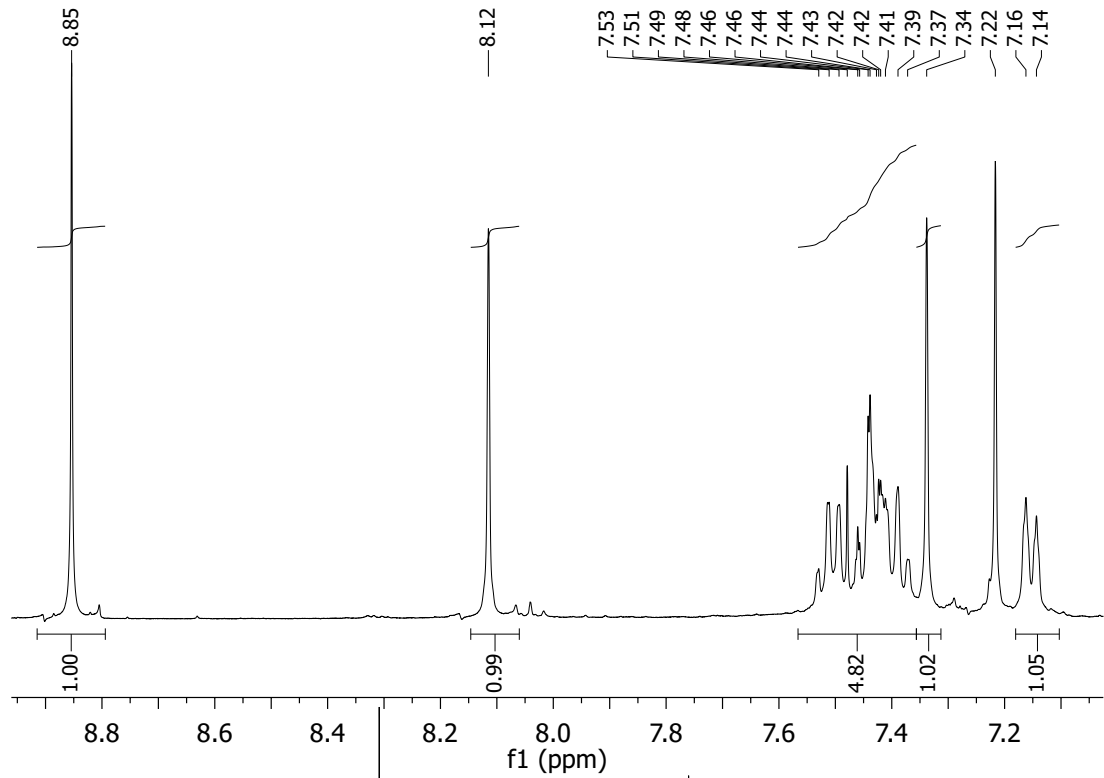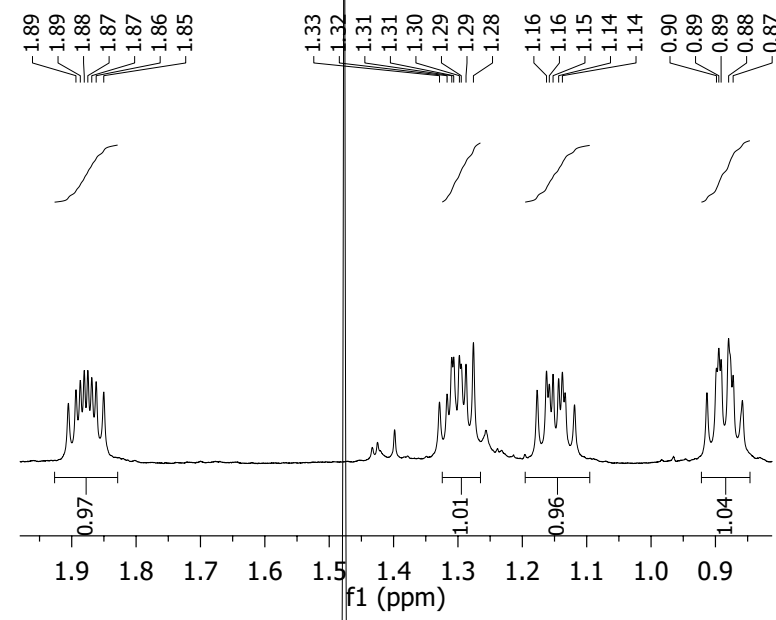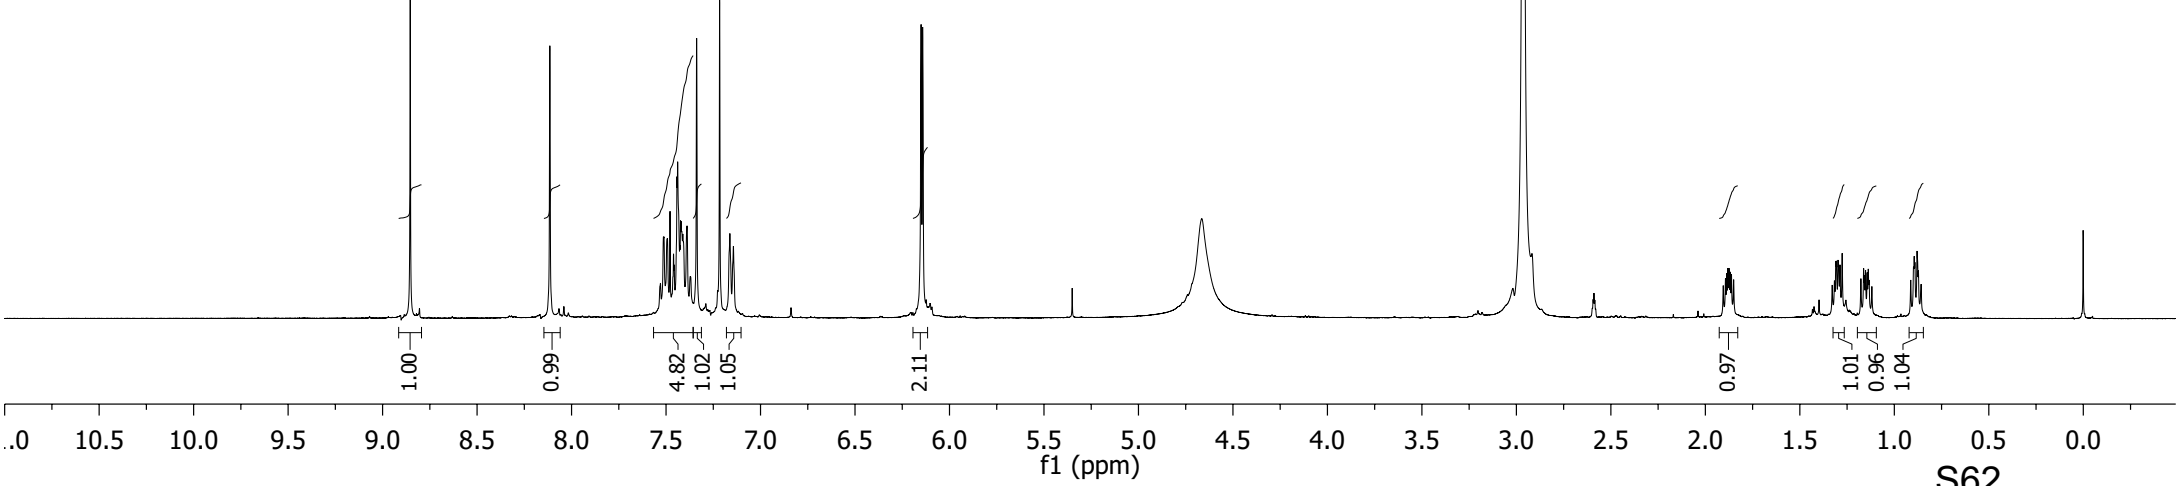

Solvent DMSO-d<sub>6</sub> + CDCl<sub>3</sub>  
Spectrometer Frequency 100

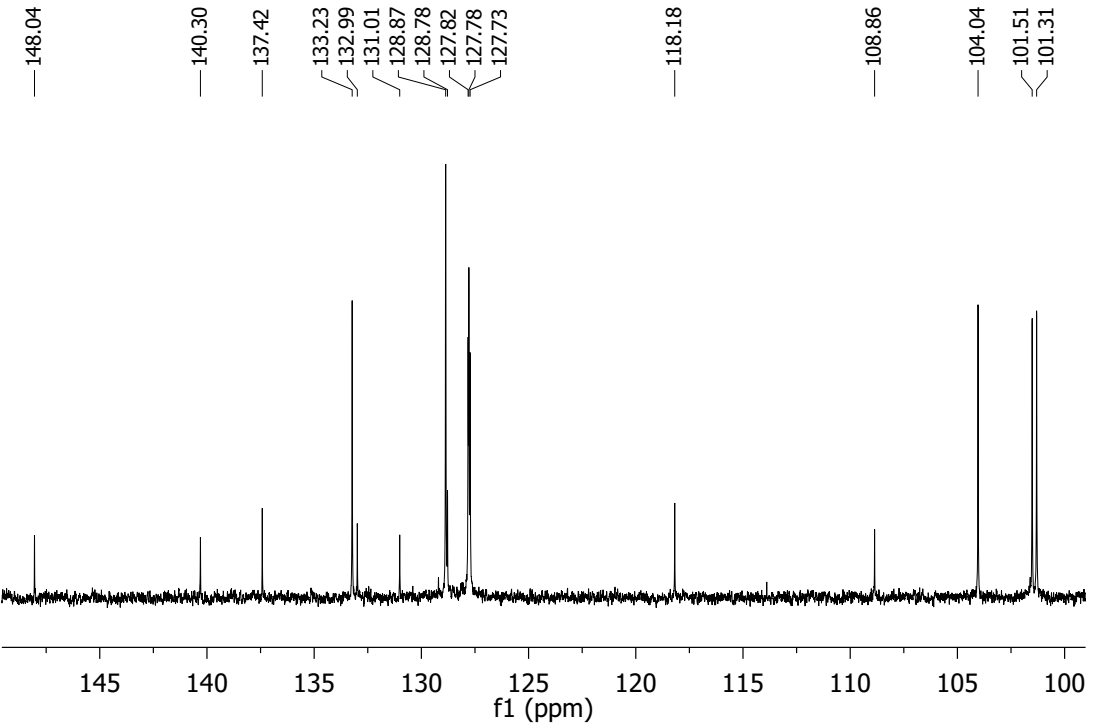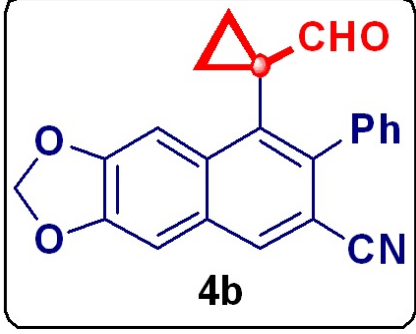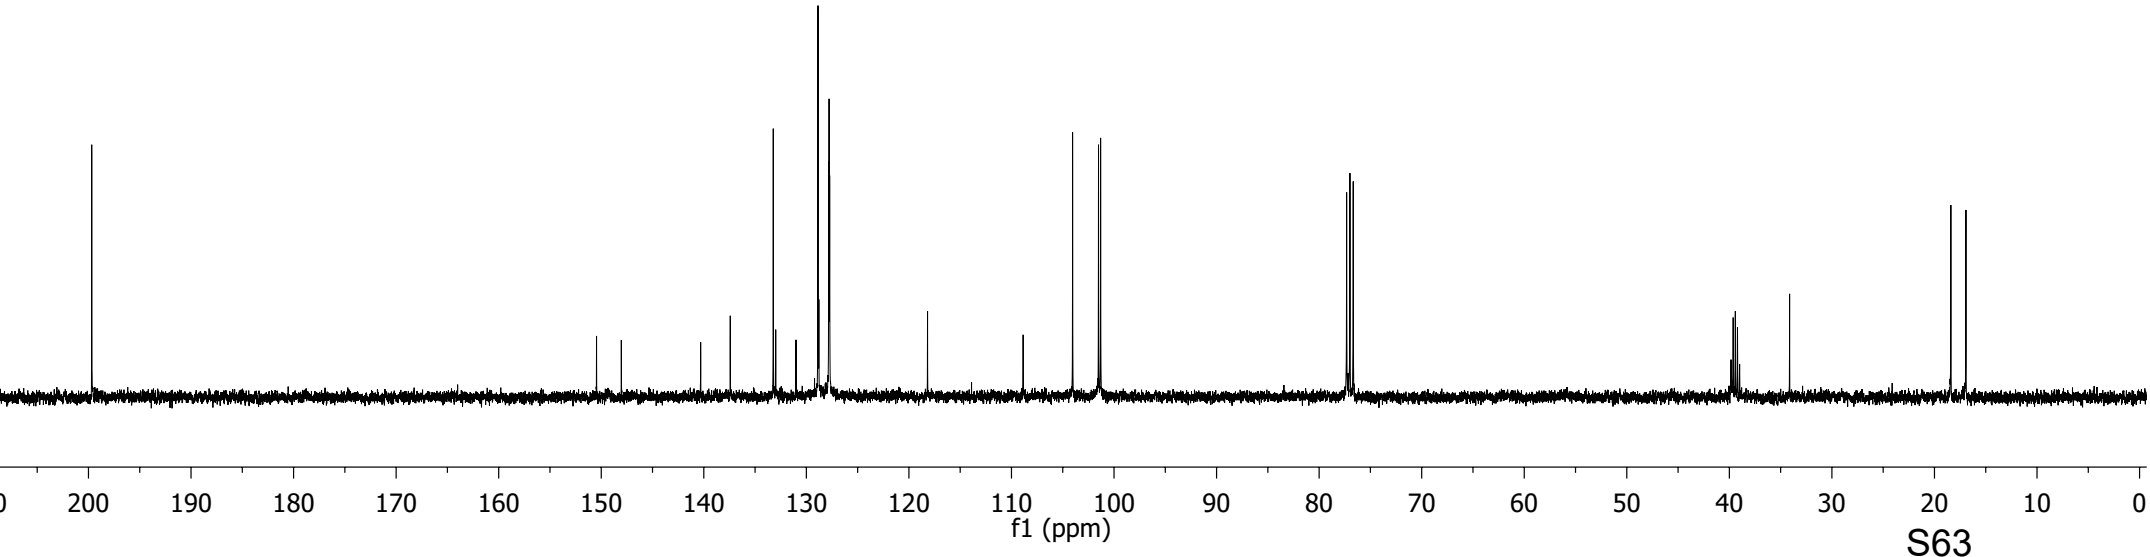

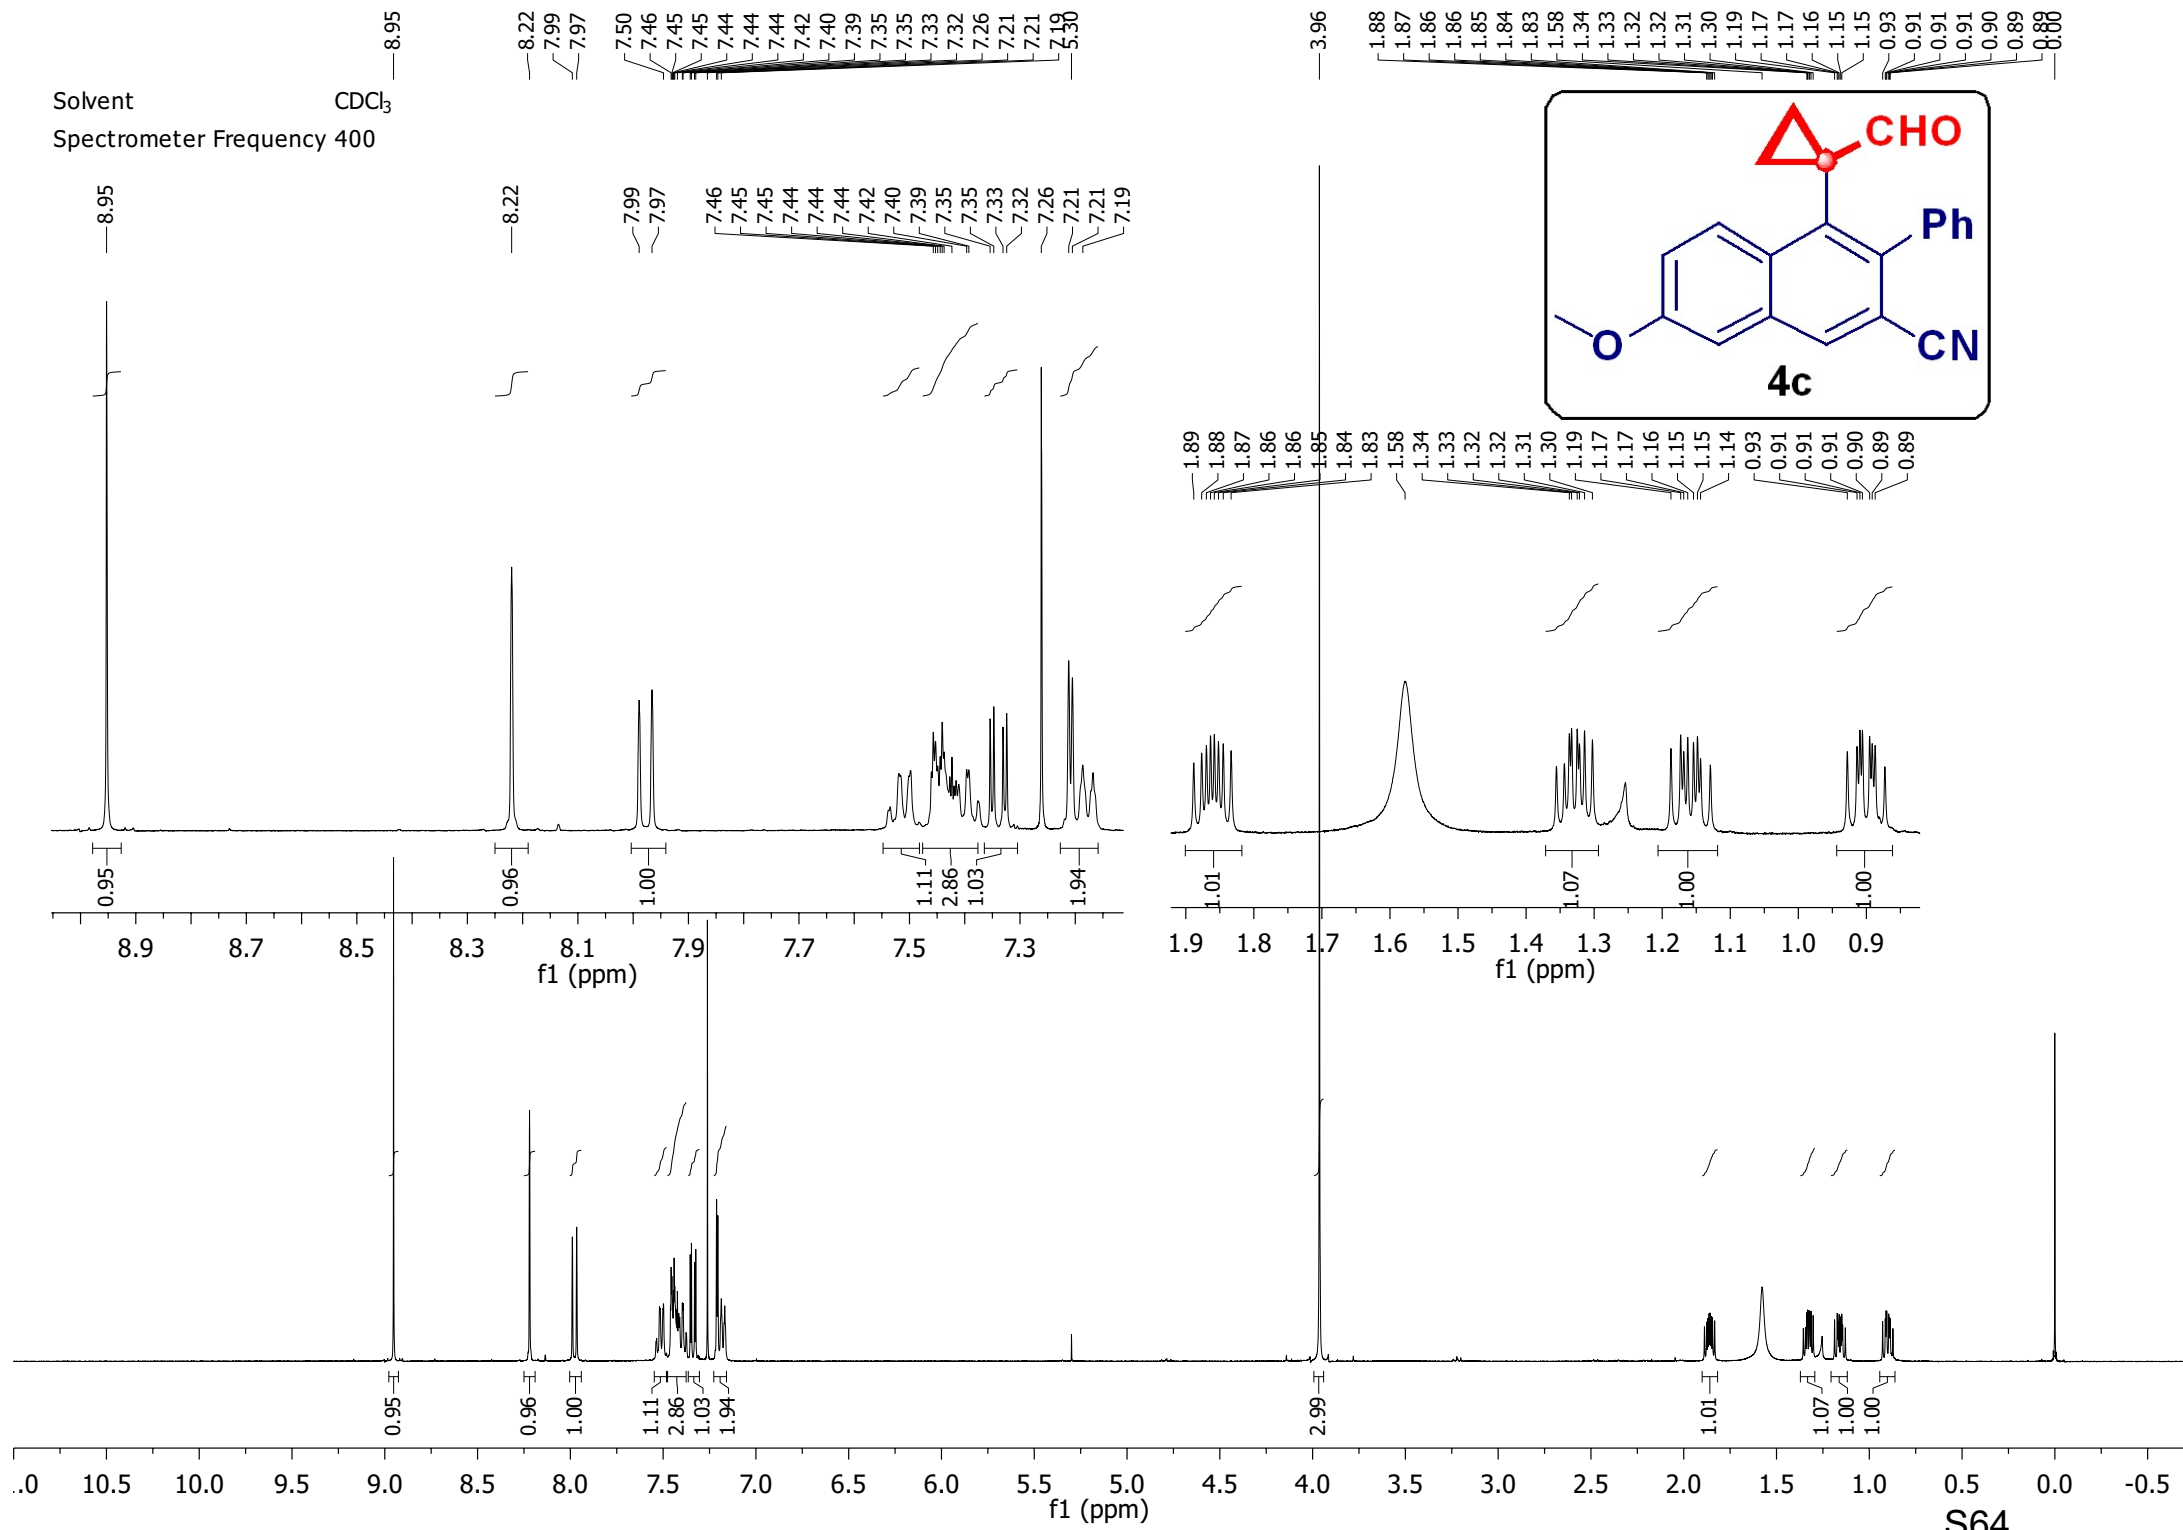



Solvent  $\text{CDCl}_3$   
Spectrometer Frequency 100

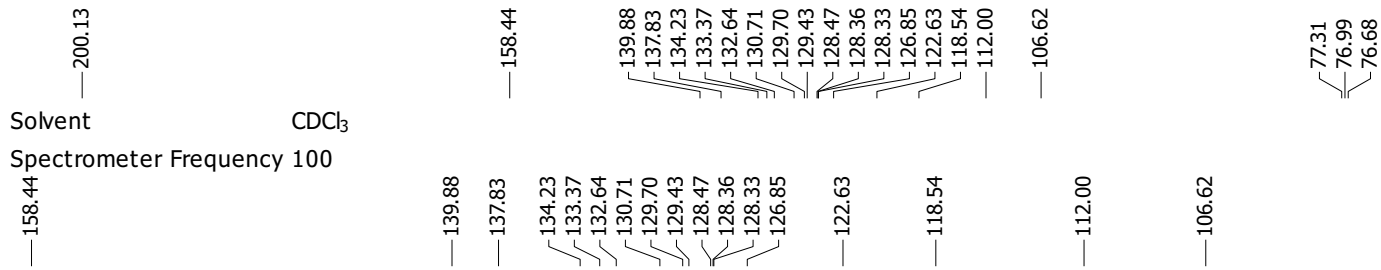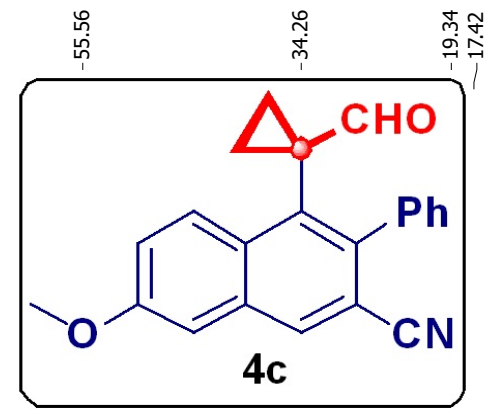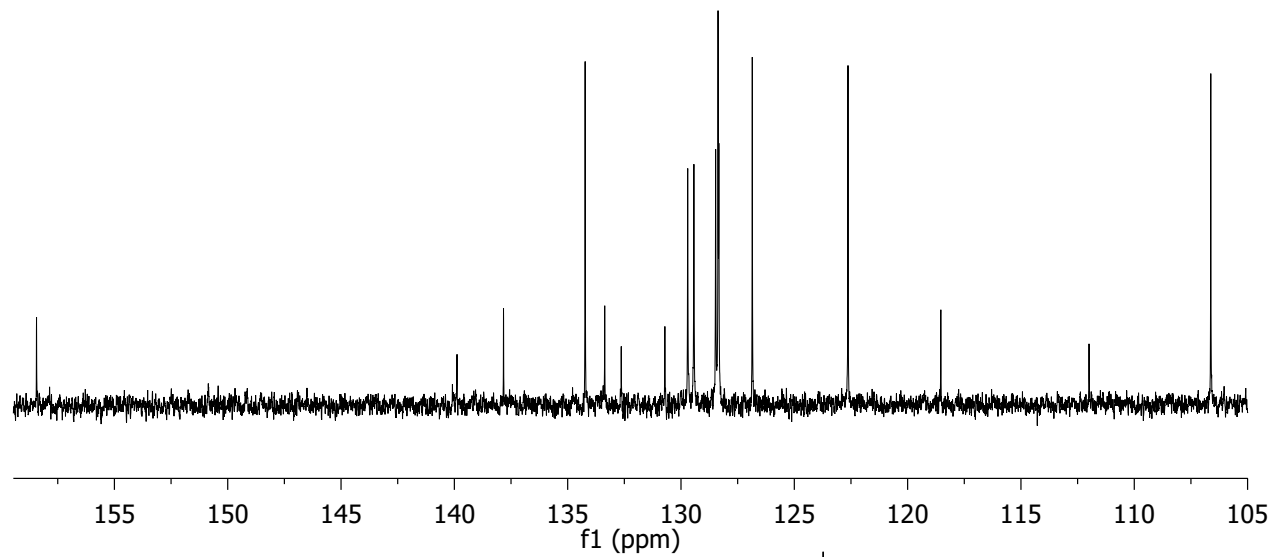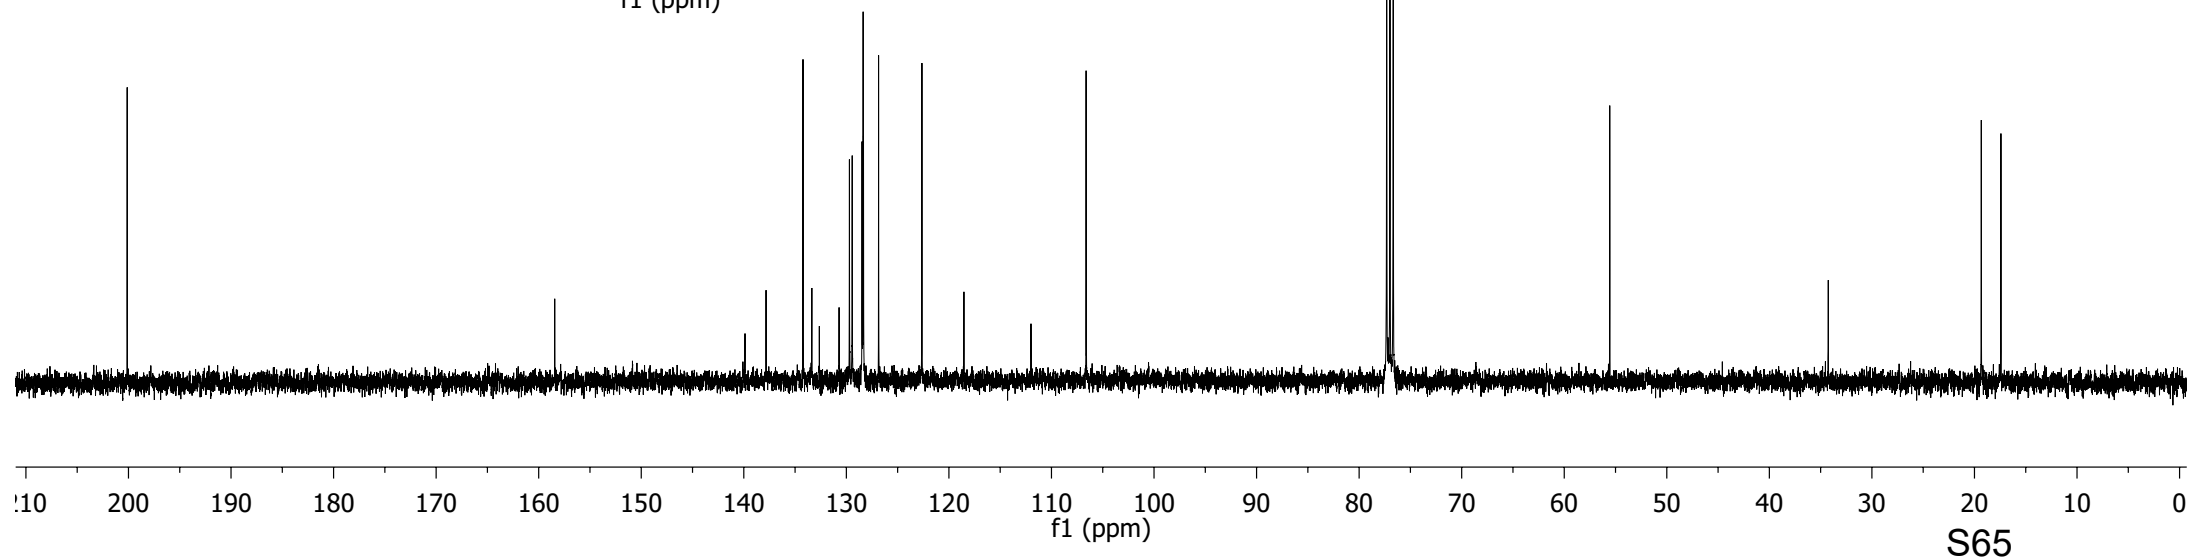

Solvent  $\text{CDCl}_3$   
Spectrometer Frequency 400

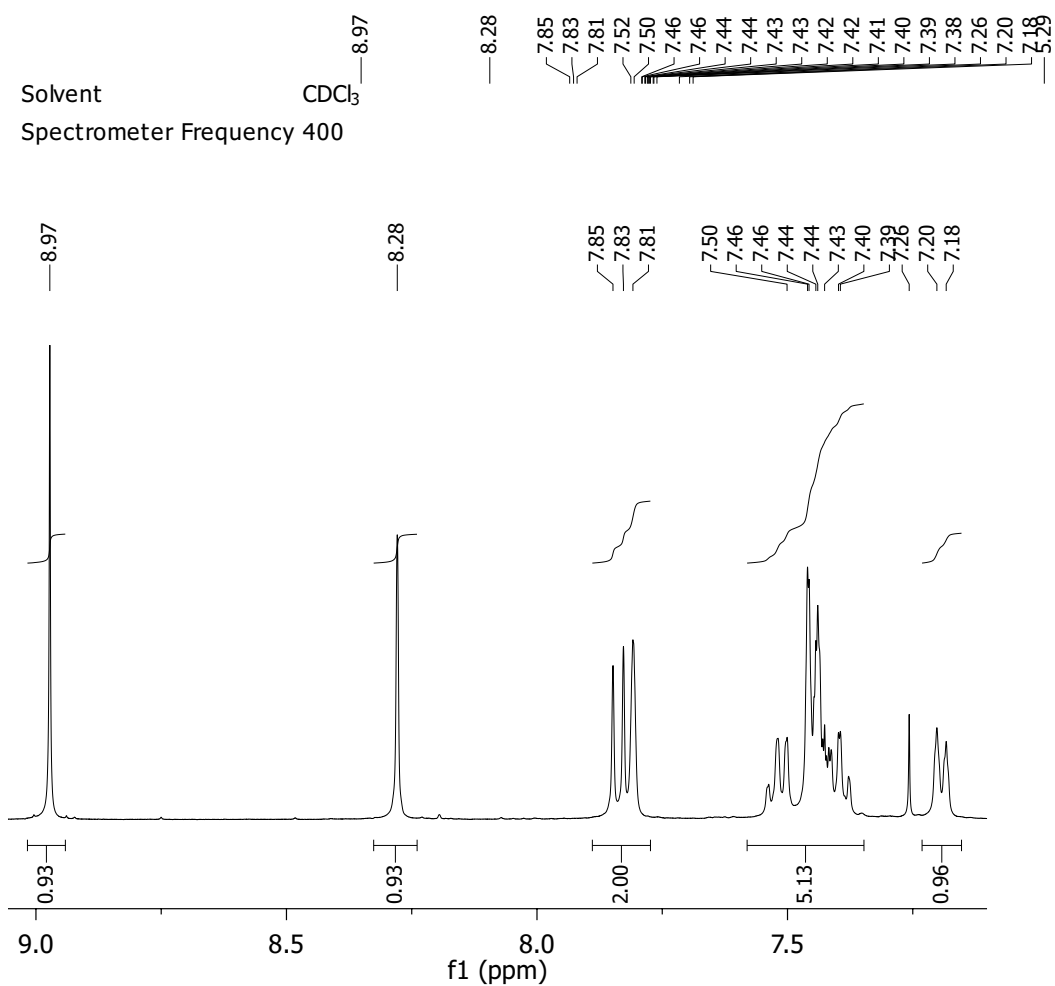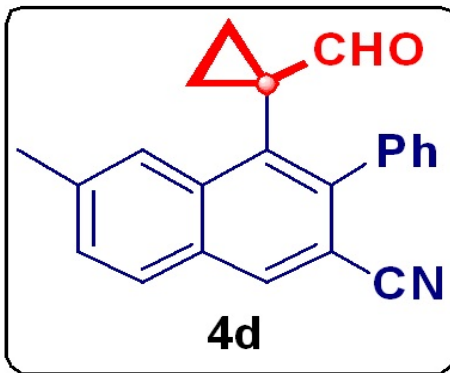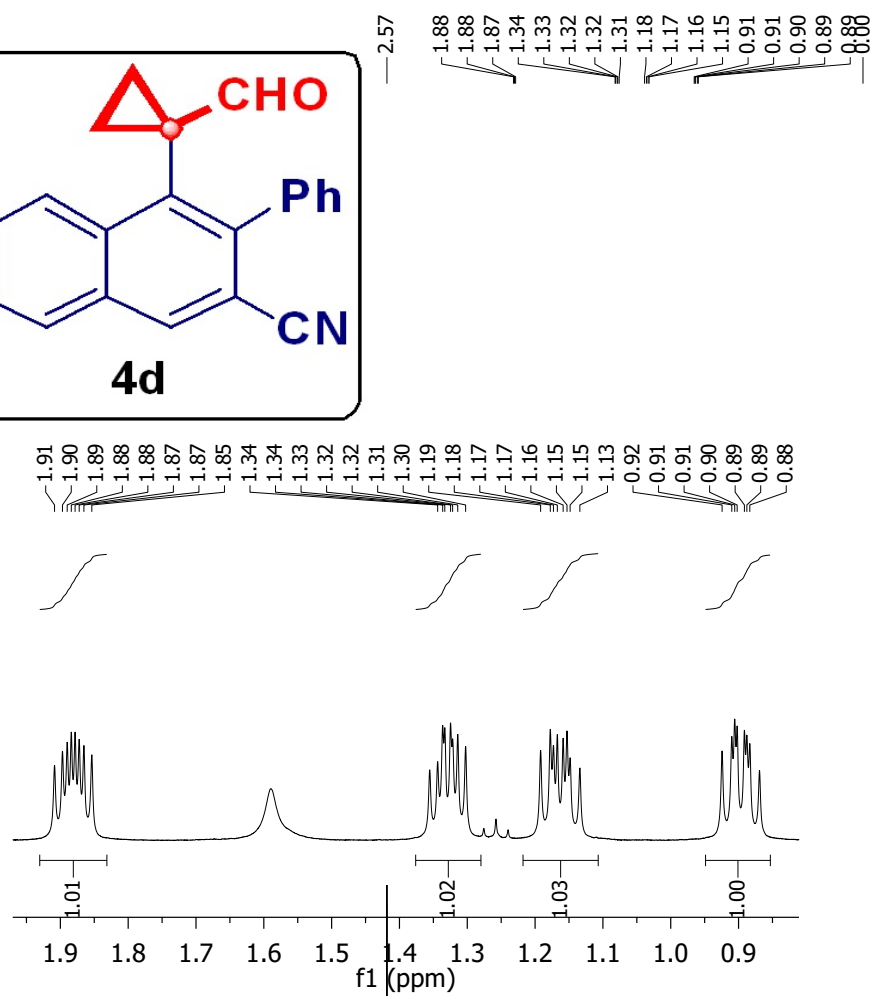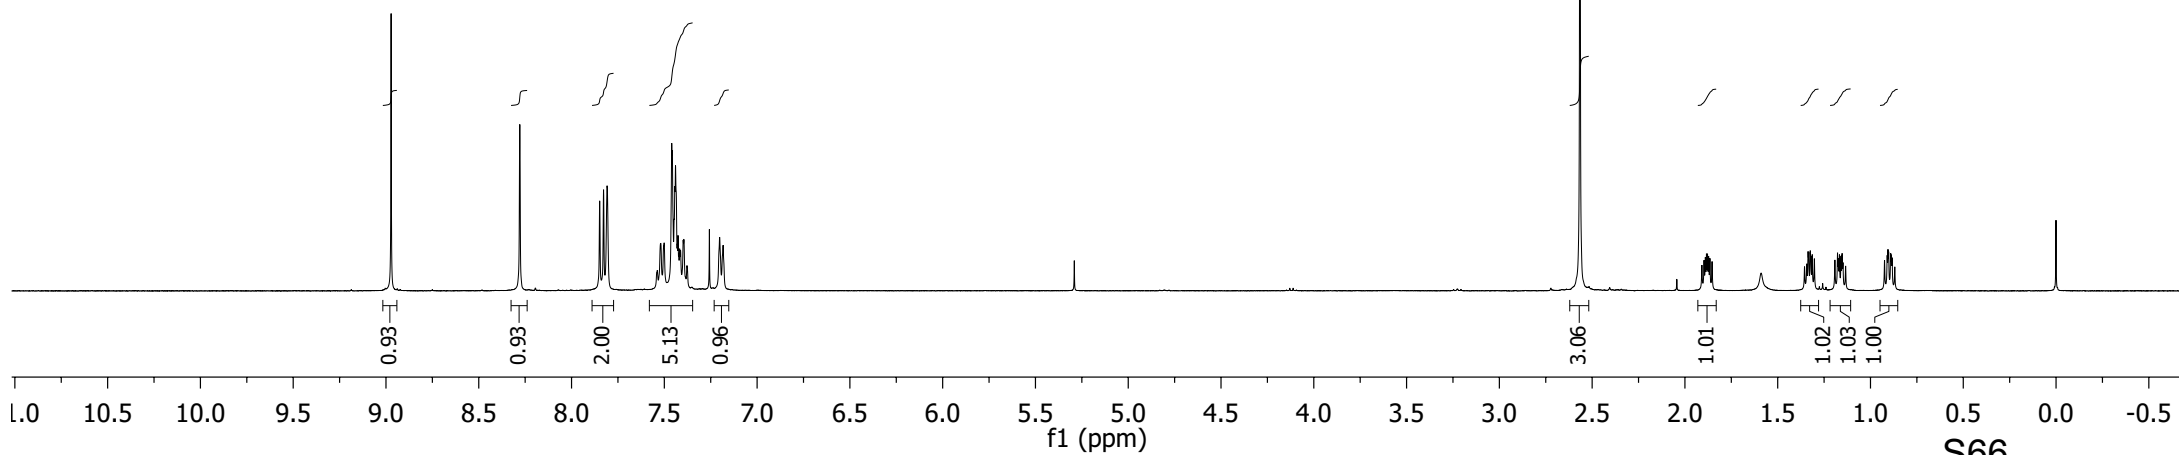

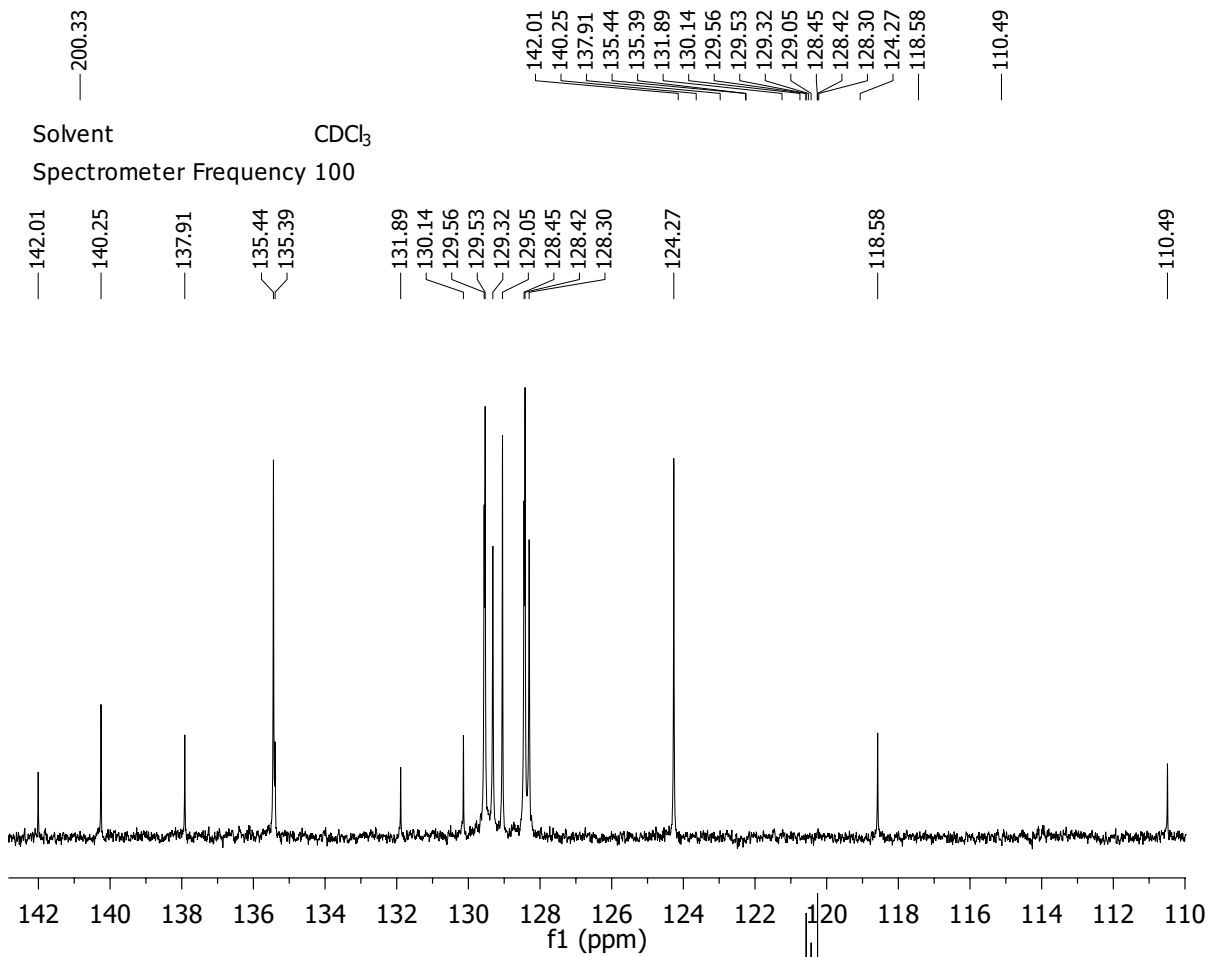

77.32  
77.00  
76.68

34.14

22.60  
19.39  
17.61

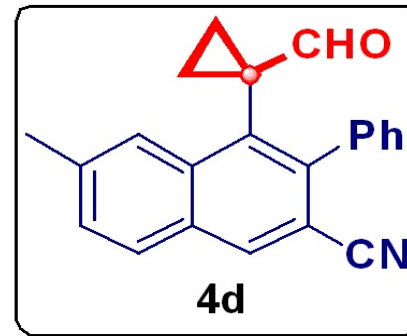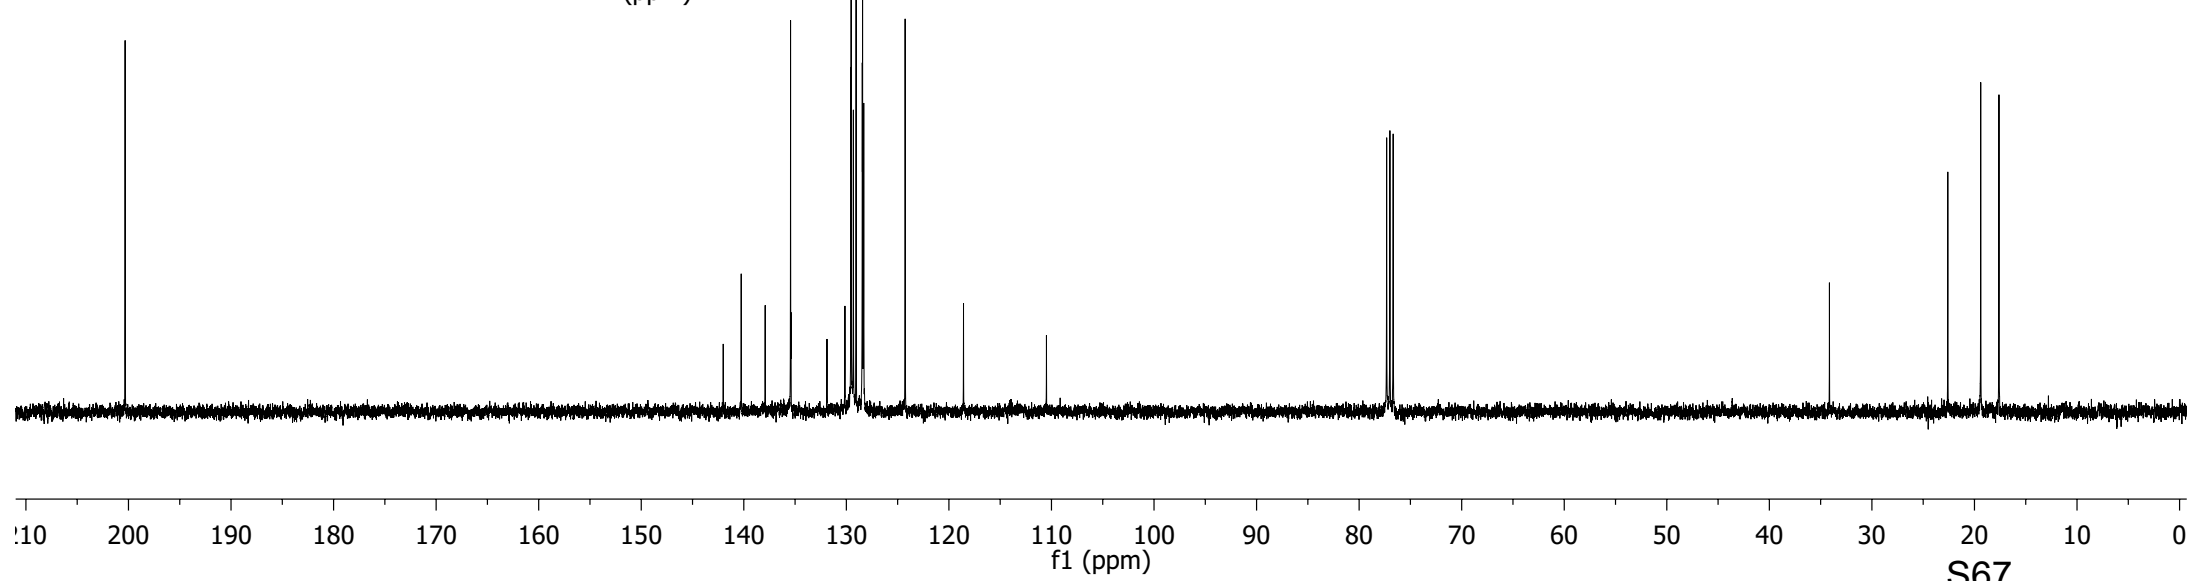

Solvent  $\text{CDCl}_3$   
Spectrometer Frequency 400

8.91 8.27 8.11 8.10 8.09 8.07 7.59 7.58 7.57 7.56 7.53 7.51 7.49 7.48 7.48 7.47 7.47 7.46 7.45 7.44 7.44 7.43 7.41 7.39 7.26 7.19 7.17 1.91 1.90 1.89 1.88 1.88 1.88 1.87 1.86 1.57 1.35 1.34 1.34 1.33 1.20 1.19 1.17 1.17 0.94 0.93 0.92

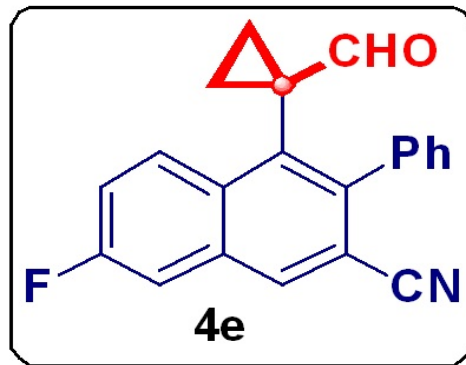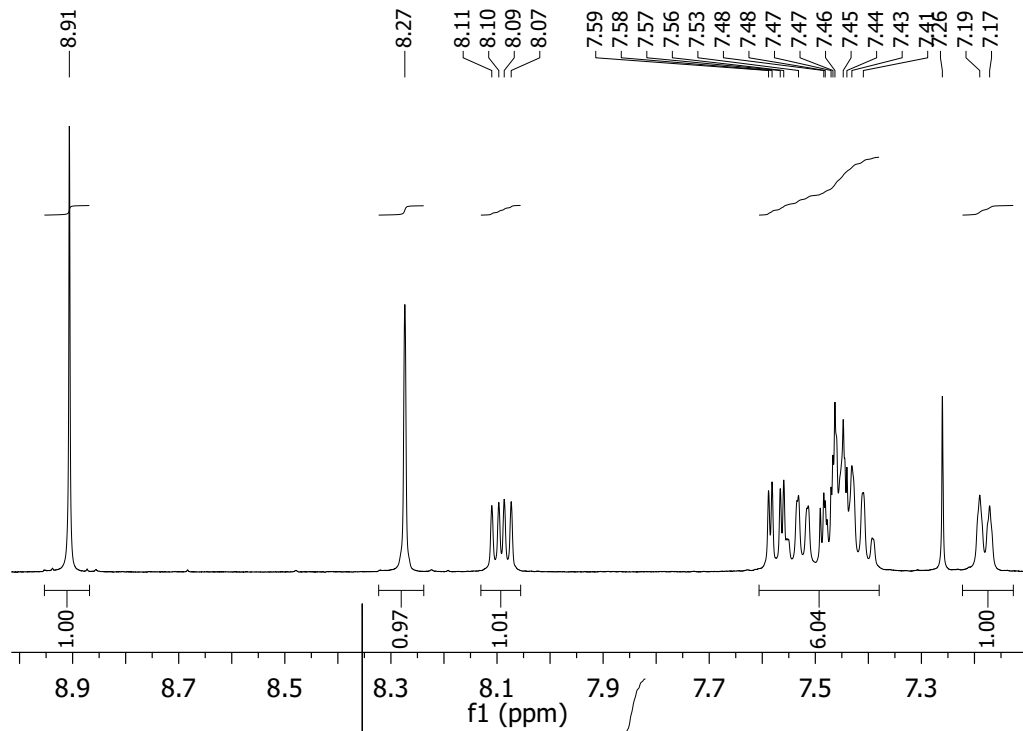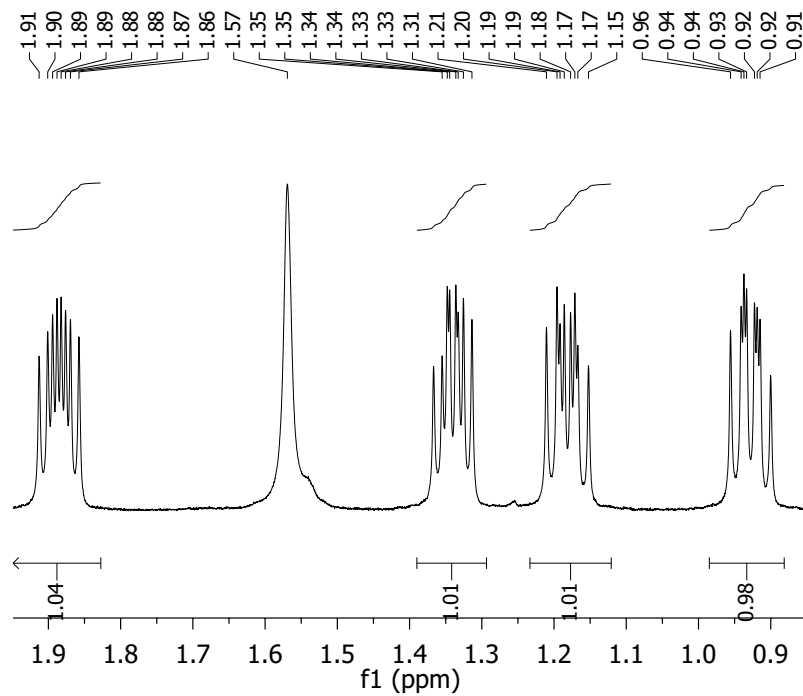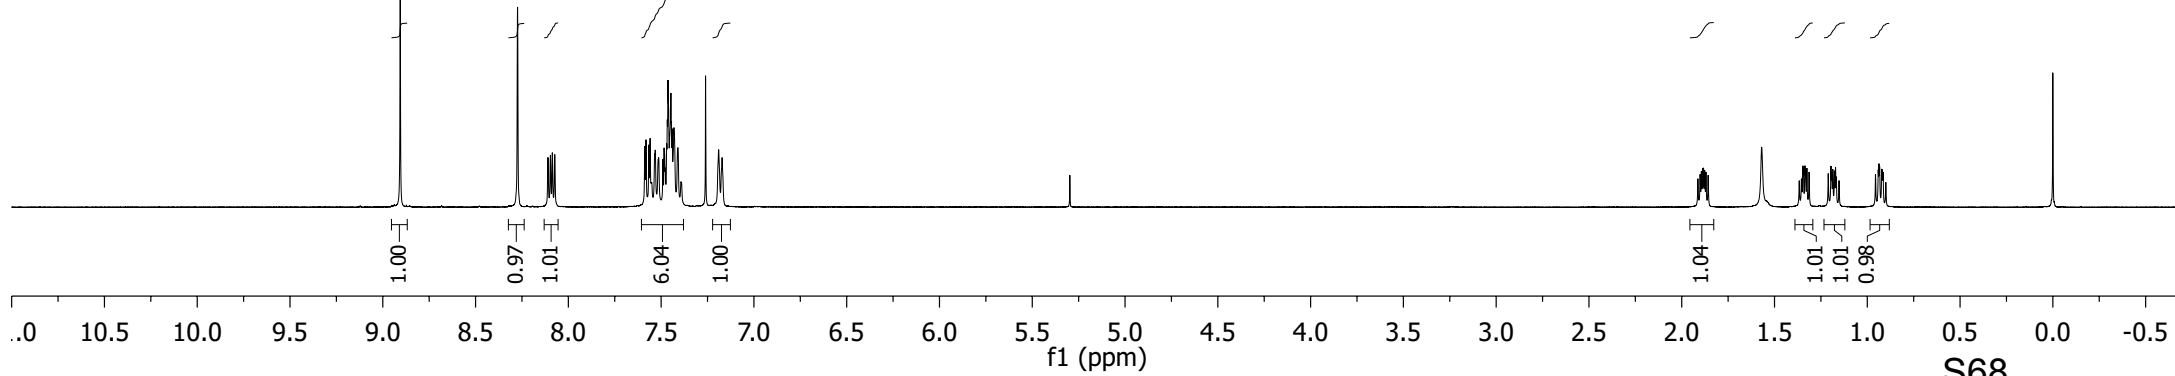

Solvent  $\text{CDCl}_3$   
Spectrometer Frequency 100

— 162.29  
— 159.80

— 162.29  
— 159.80  
— 137.44  
— 134.77  
— 134.71  
— 132.83  
— 132.24  
— 129.51  
— 129.30  
— 128.65  
— 128.59  
— 128.43  
— 128.15  
— 128.06  
— 120.16  
— 119.92  
— 117.99  
— 112.95  
— 112.33  
— 112.12

— 77.32  
— 77.00  
— 76.68

— 34.38

— 19.04  
— 17.21

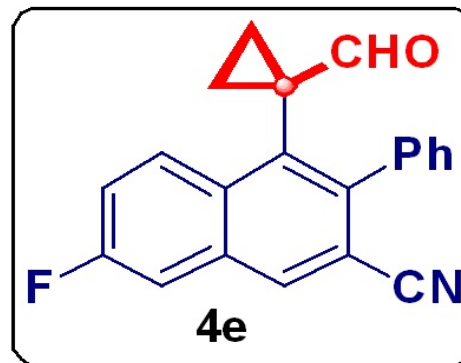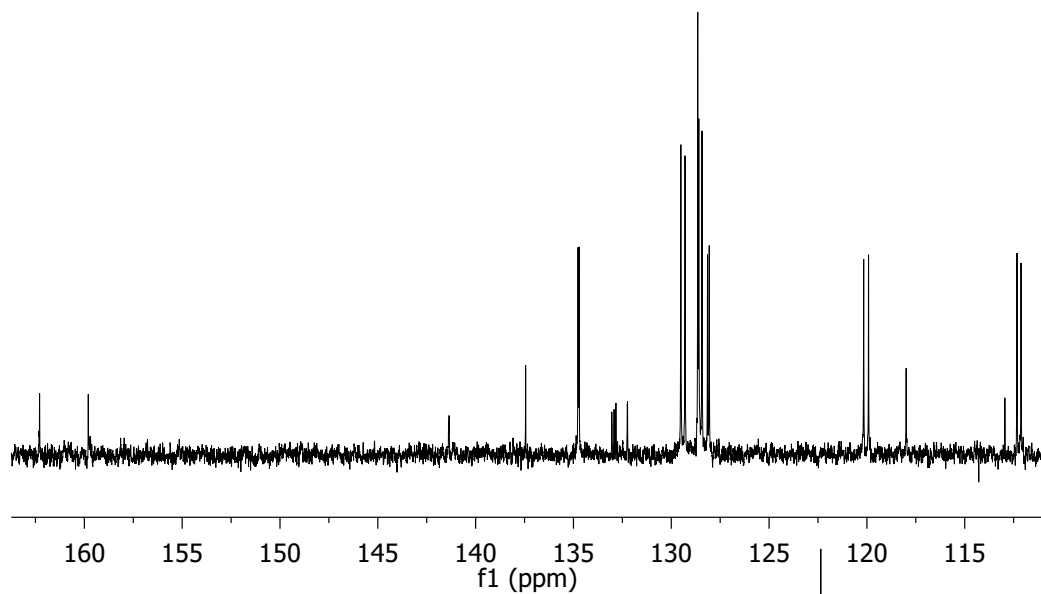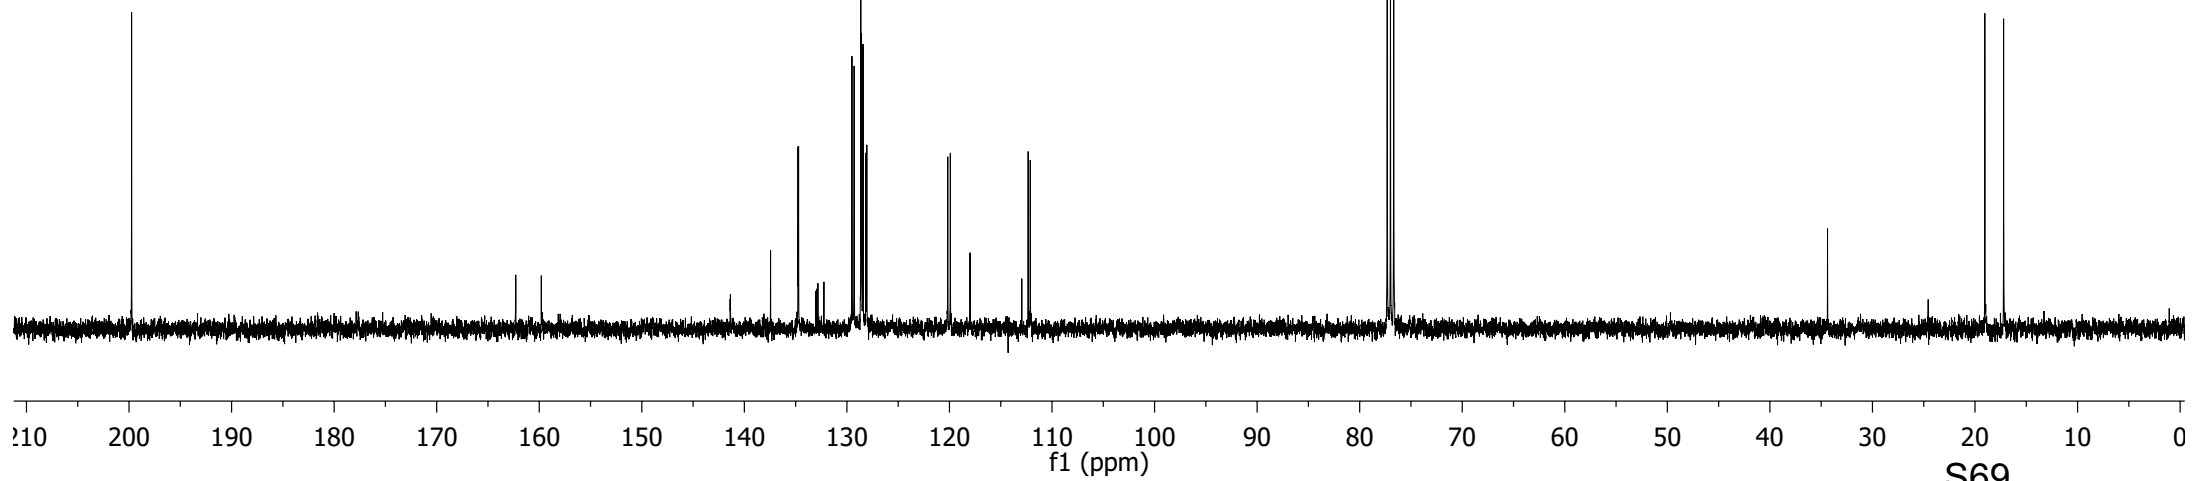

Solvent  $\text{CDCl}_3$   
 Spectrometer Frequency 400

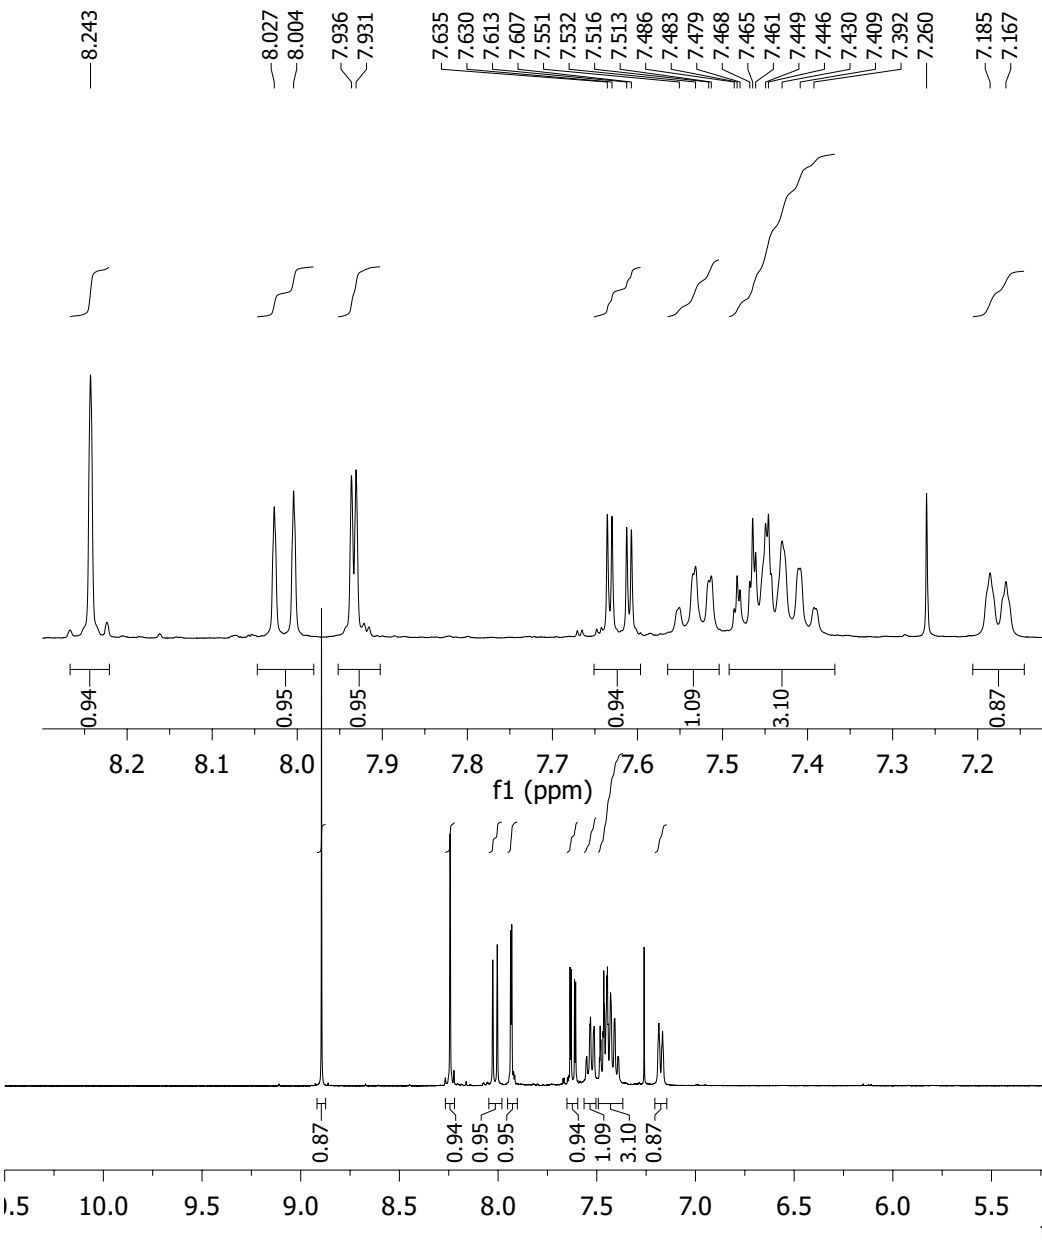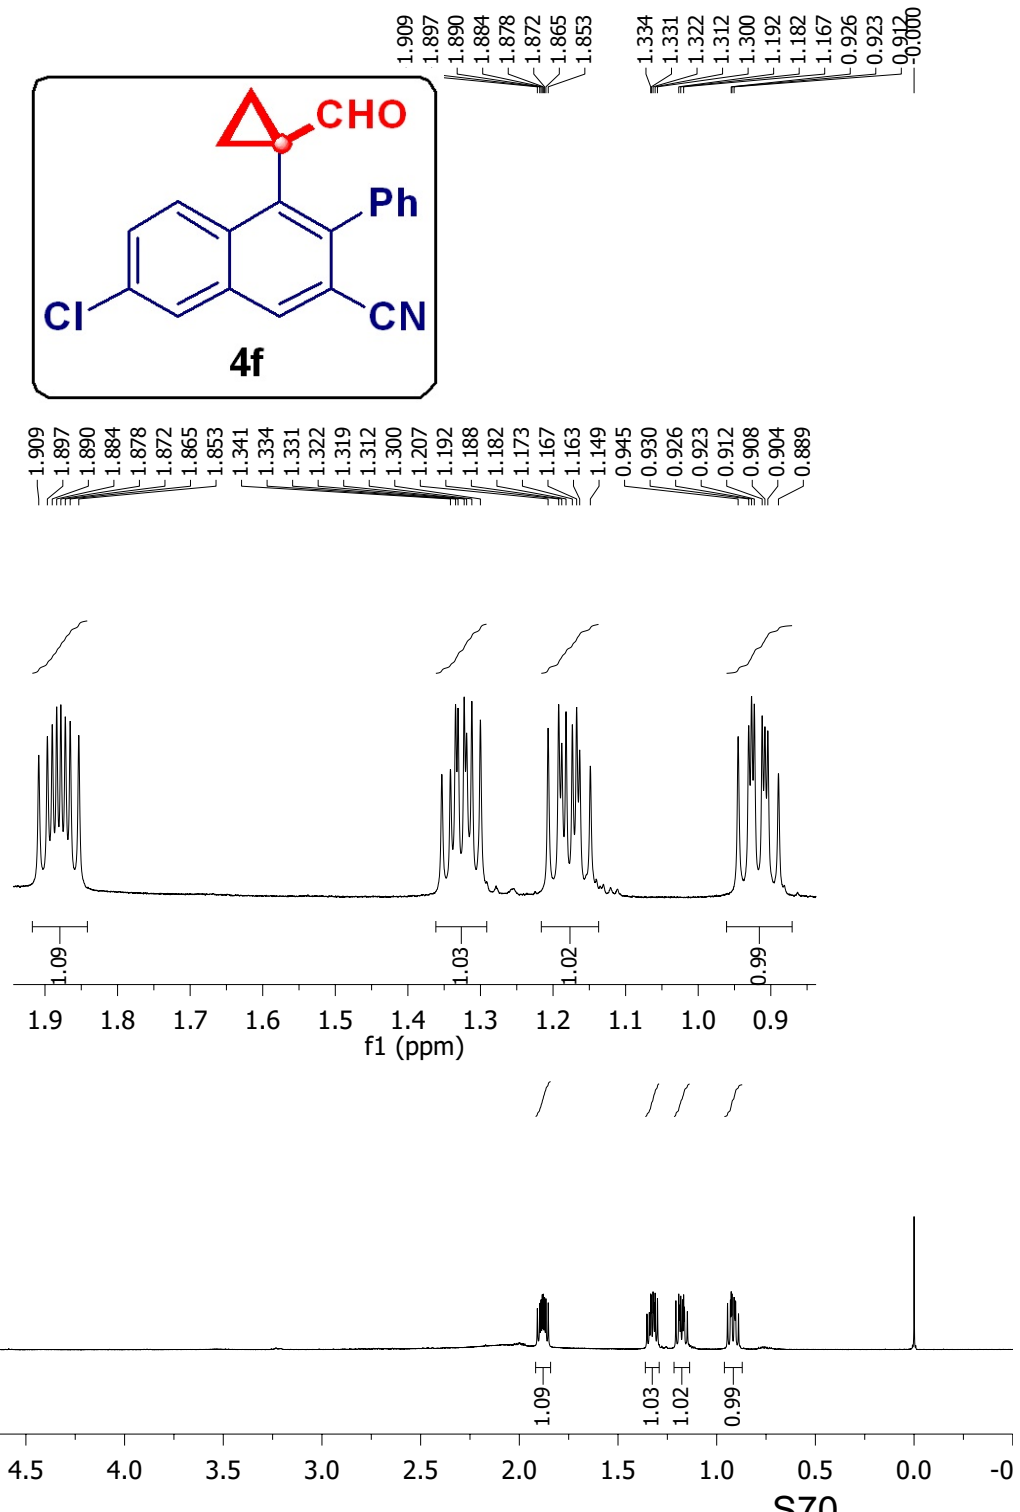

Solvent  $\text{CDCl}_3$   
Spectrometer Frequency 100

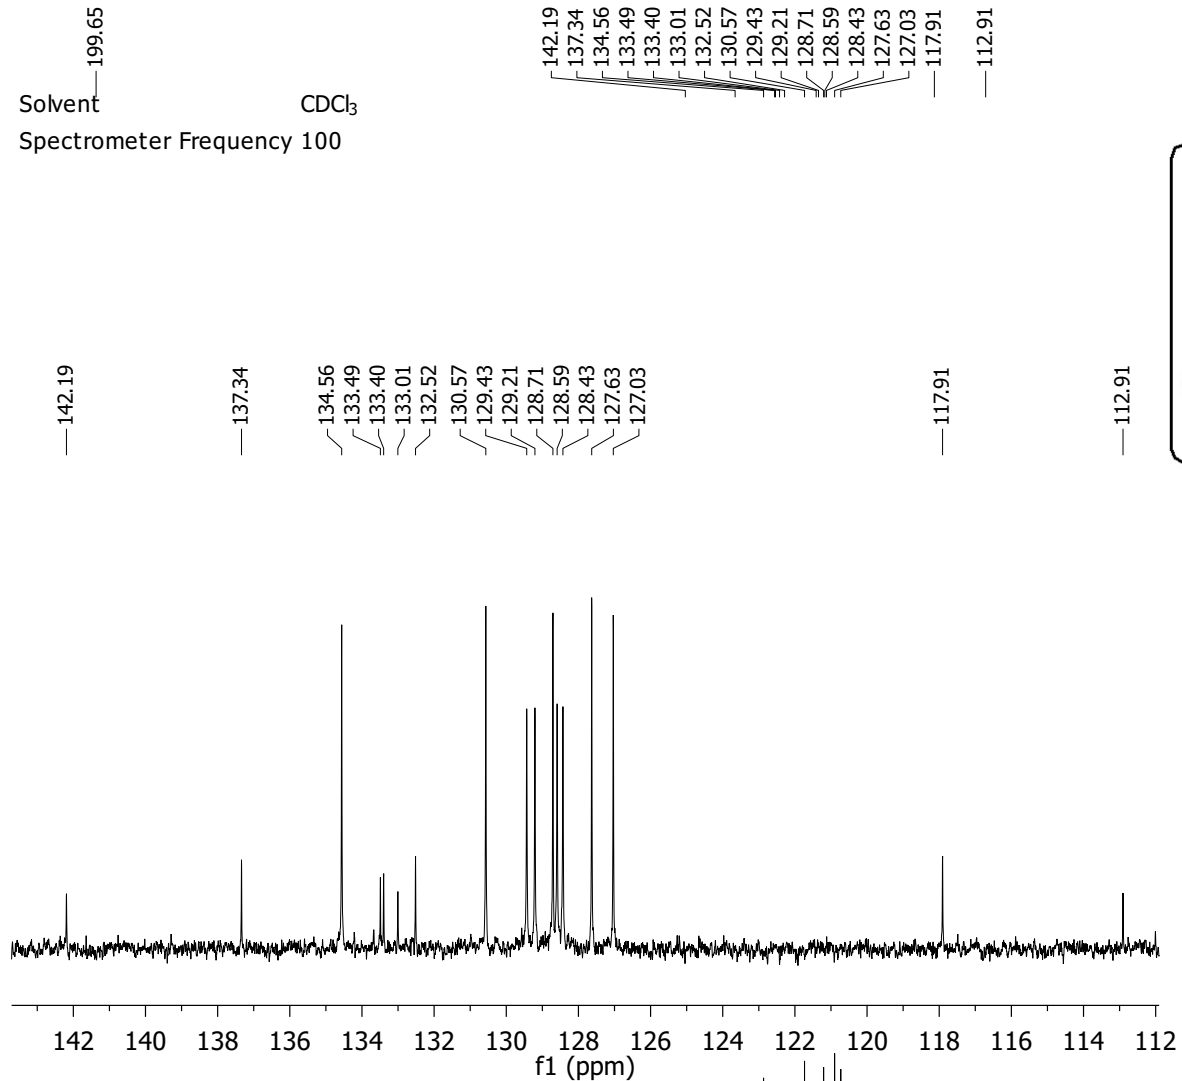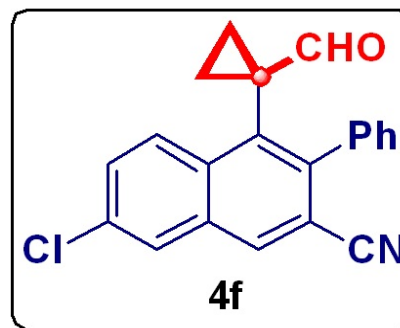

77.31, 76.99, 76.68  
34.24  
18.95, 17.07

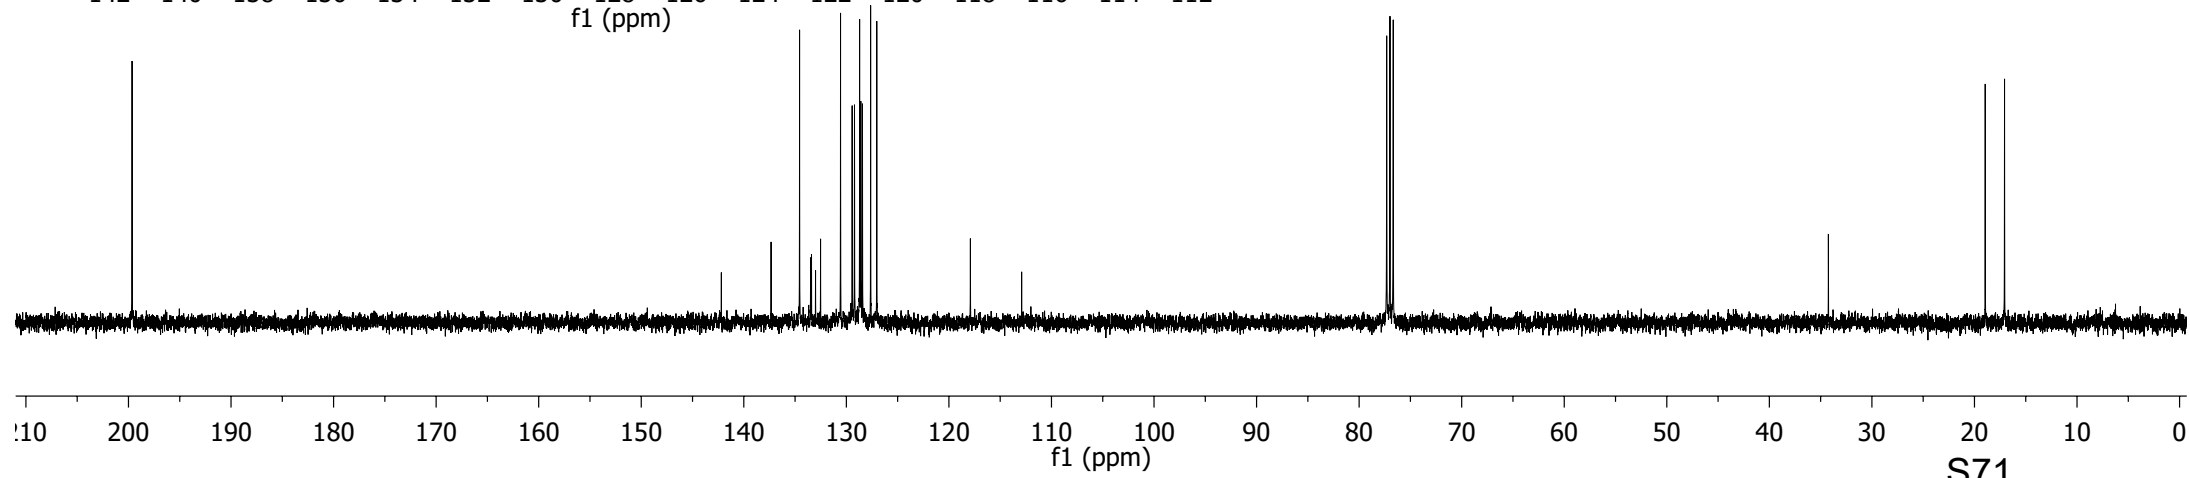

Solvent  $\text{CDCl}_3$   
Spectrometer Frequency 400

9.22  
9.03  
9.00  
8.97  
8.78  
8.33  
8.08  
8.06  
7.95  
7.93  
7.71  
7.70  
7.69  
7.69  
7.68  
7.67  
7.67  
7.63  
7.63  
7.61  
7.61  
7.59  
7.59  
7.53  
7.52  
7.42  
7.39  
7.37  
7.26  
7.12  
7.10

2.61  
1.88  
1.88  
1.37  
1.33  
1.32  
1.32  
1.31  
1.31  
1.30  
1.29  
1.18  
1.17  
1.15  
0.90  
0.89  
0.89  
0.88  
0.88  
0.00  
-0.01

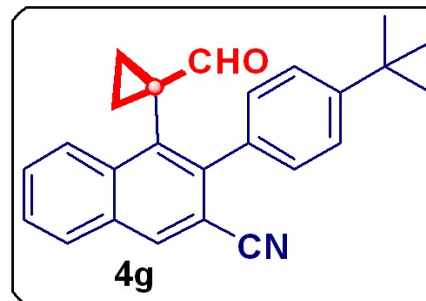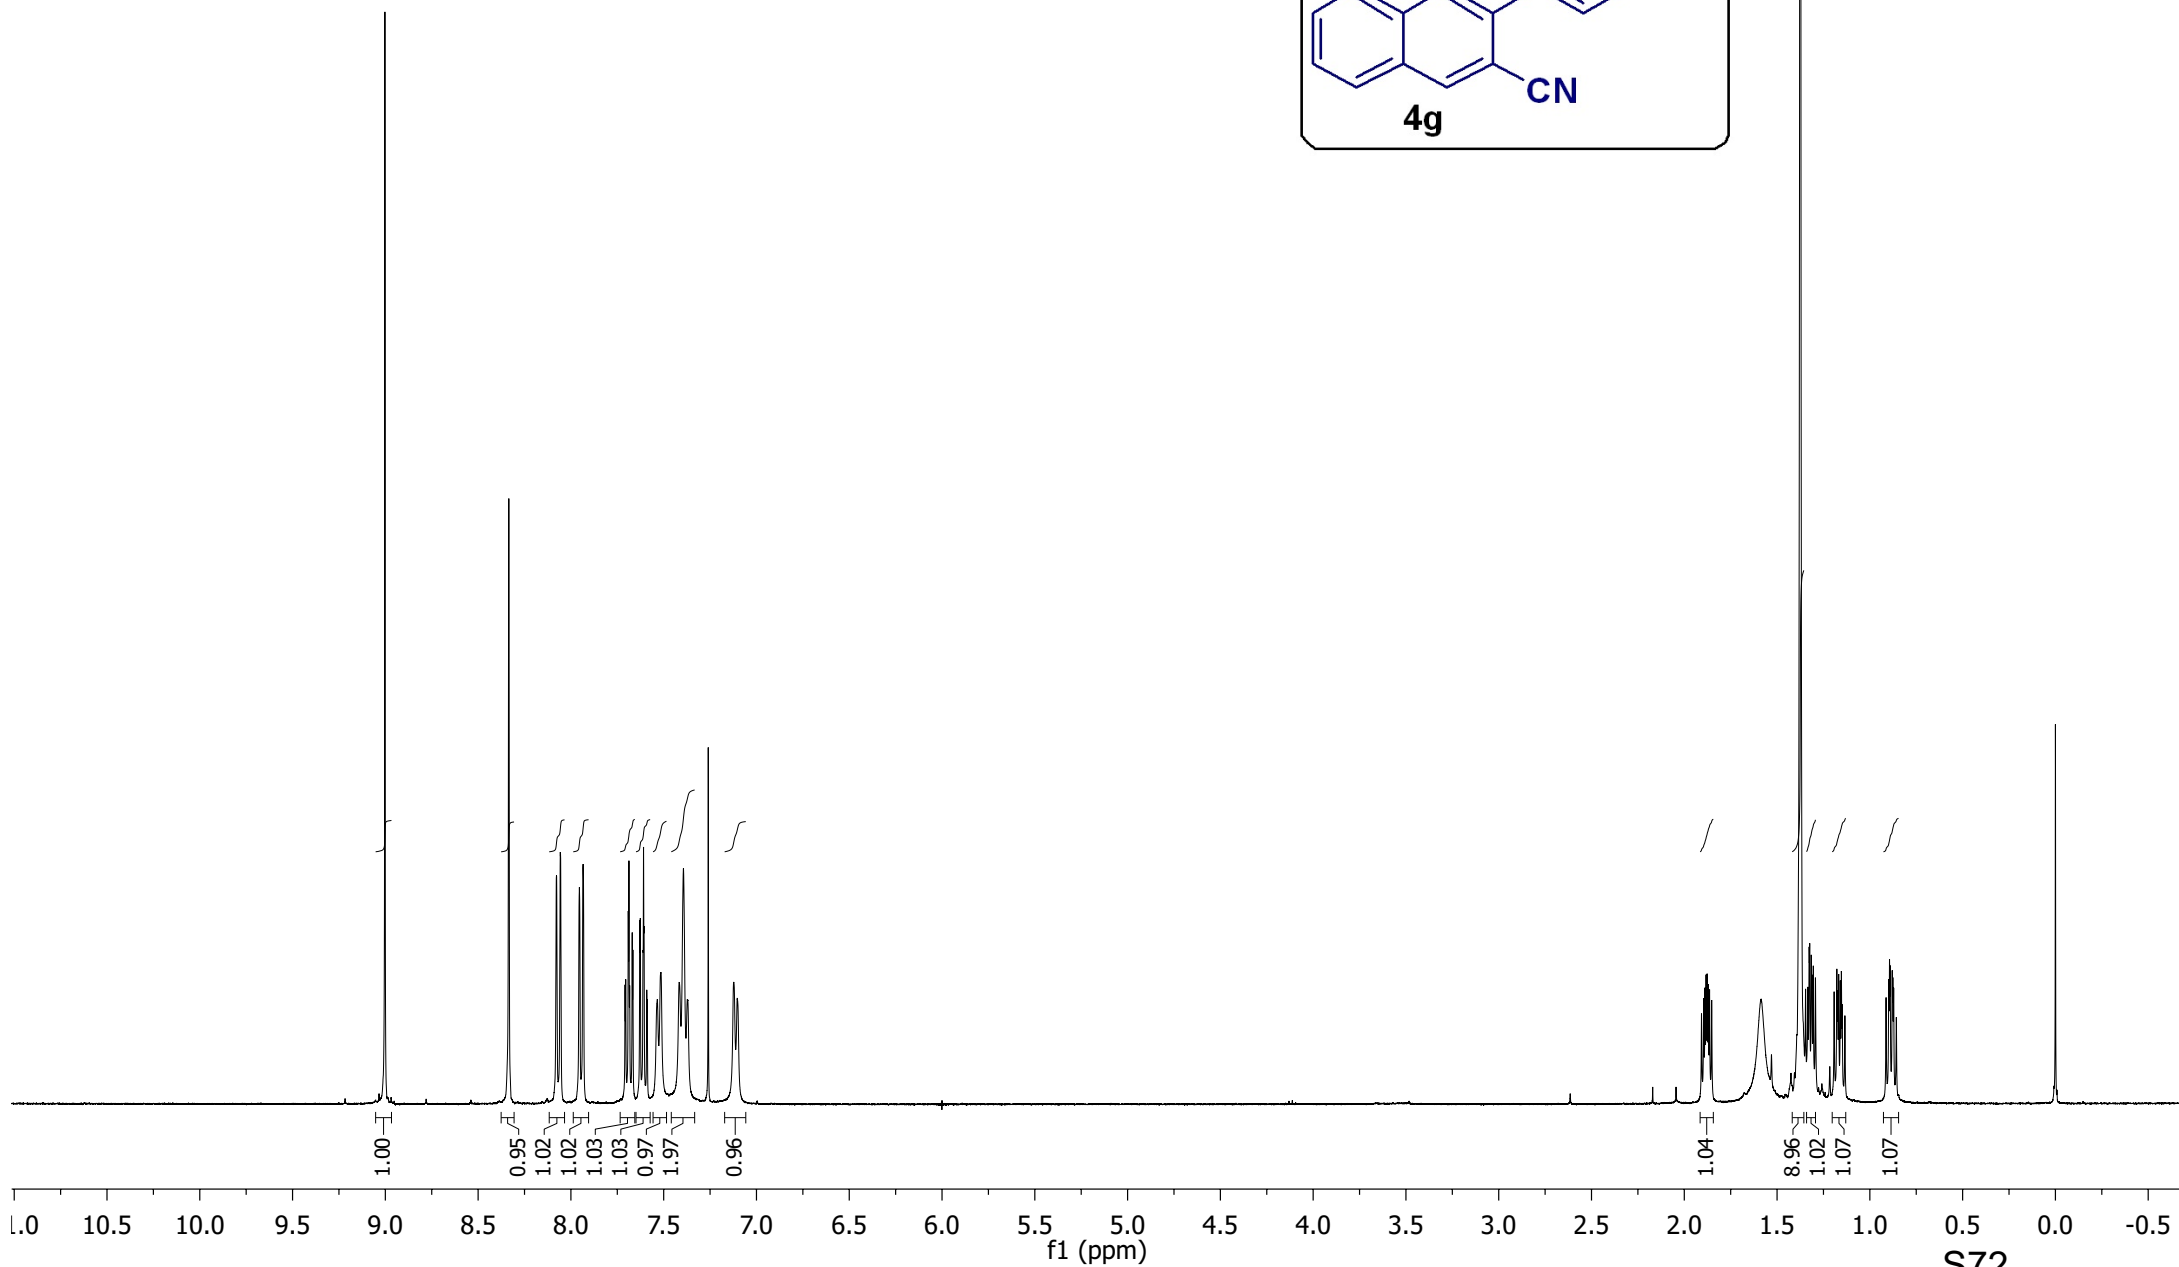



Solvent  $\text{CDCl}_3$   
Spectrometer Frequency 100

—151.48 —141.99 —135.78 —135.25 —134.62 —132.77 —131.77 —129.73 —129.33 —129.20 —128.96 —127.14 —125.28 —125.19 —118.53 —111.67 —111.67

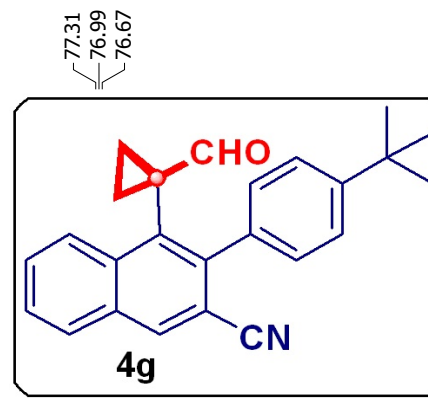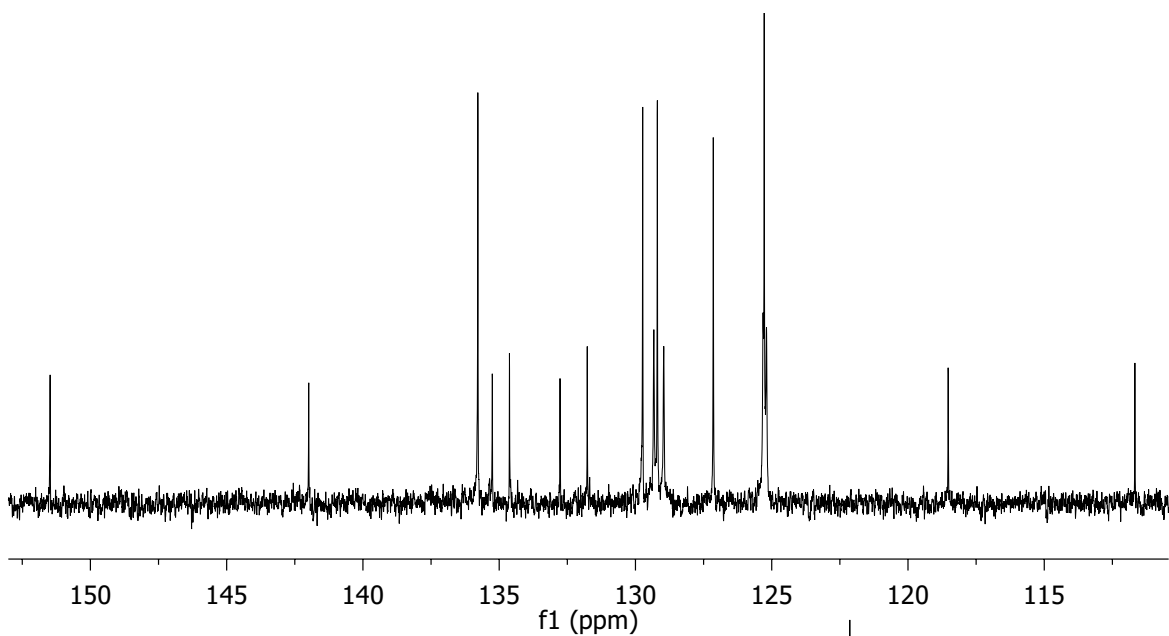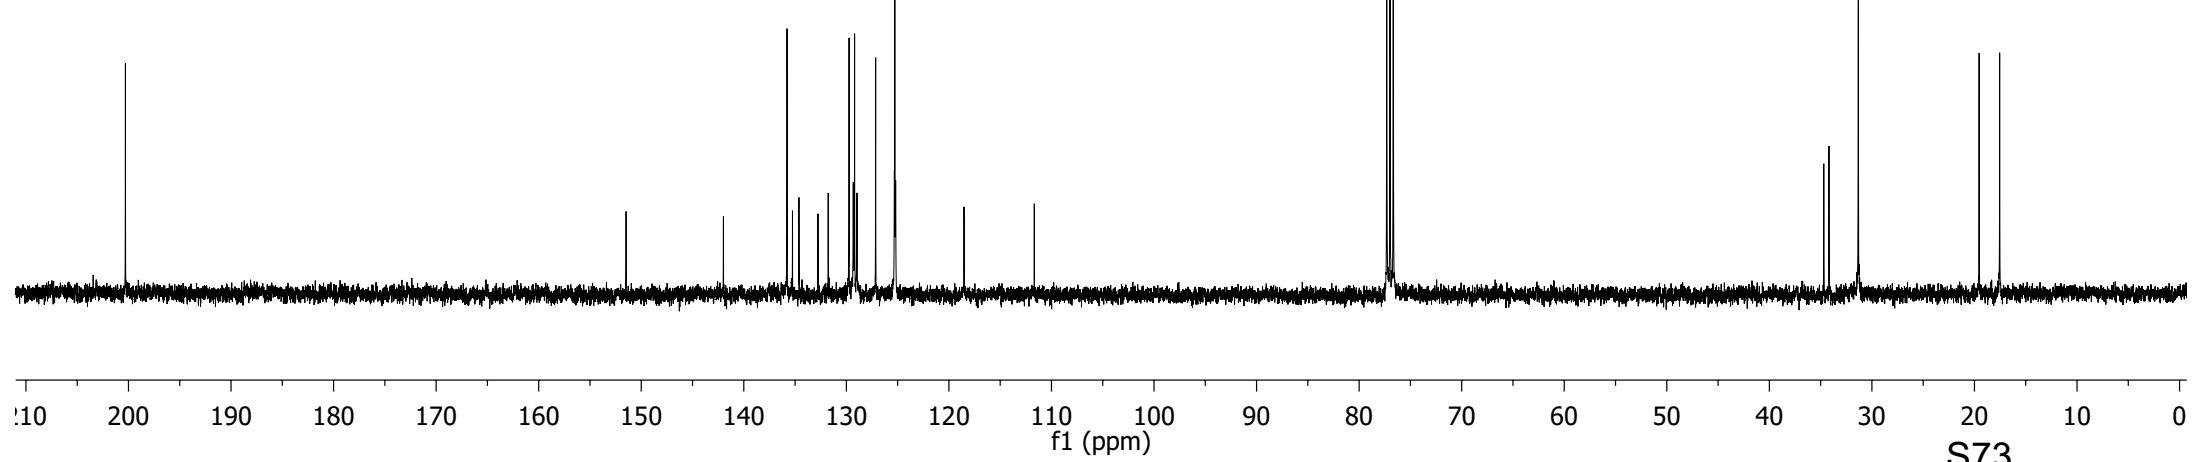

Solvent CDCl<sub>3</sub>  
Spectrometer Frequency 400

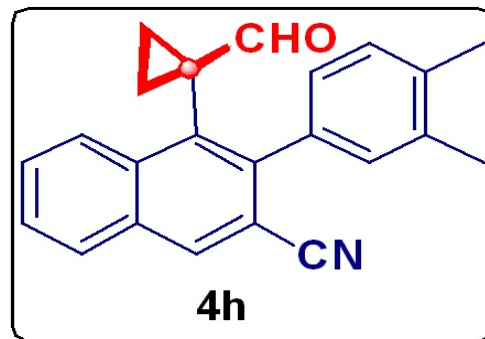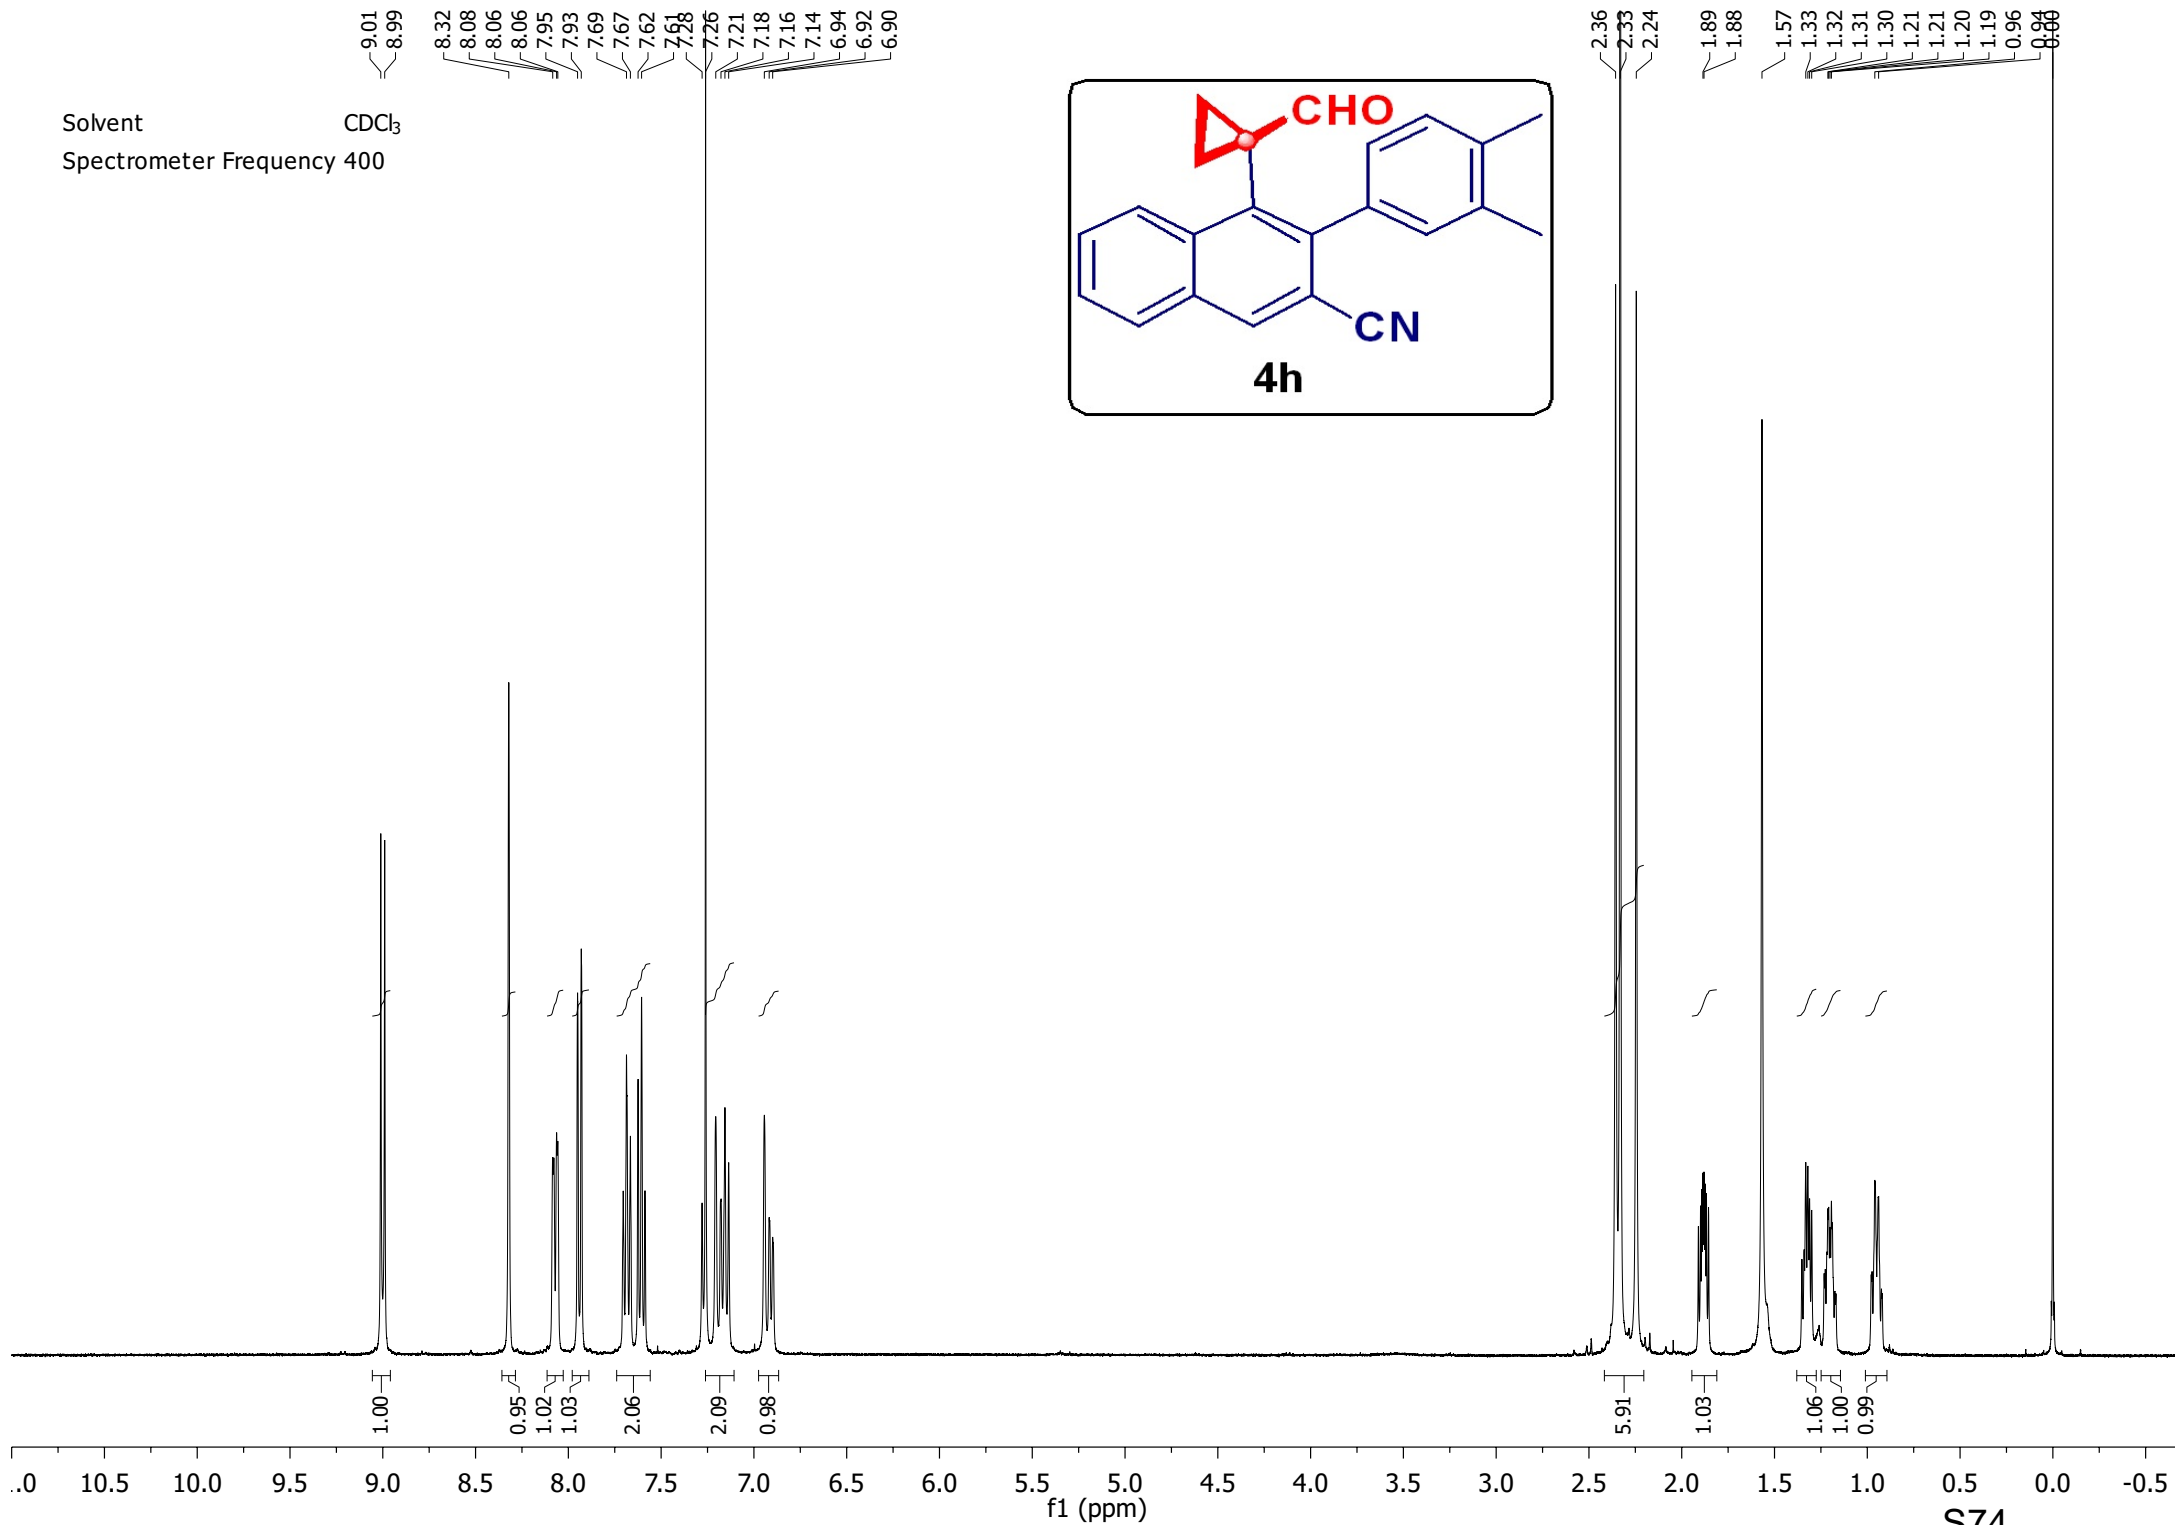

200.25  
200.18

Solvent

CDCl<sub>3</sub>

Spectrometer Frequency 150

142.26  
136.89  
135.28  
131.77  
129.74  
129.69  
129.20  
127.10  
125.29  
118.53  
111.89

142.26  
136.89  
136.66  
136.47  
135.68  
135.61  
135.28  
135.20  
132.64  
131.77  
130.38  
129.74  
129.69  
129.58  
129.20  
127.10  
126.69  
125.29

118.53  
111.89

77.20  
76.99  
76.78

34.16

19.88  
19.72  
19.64  
19.58  
17.71

-0.02

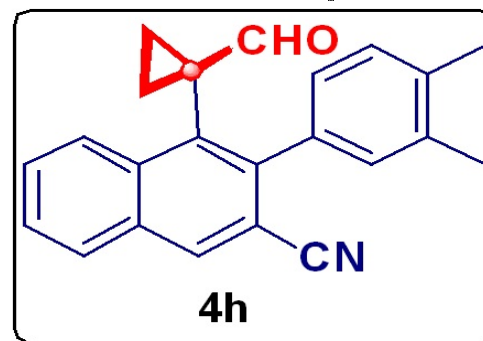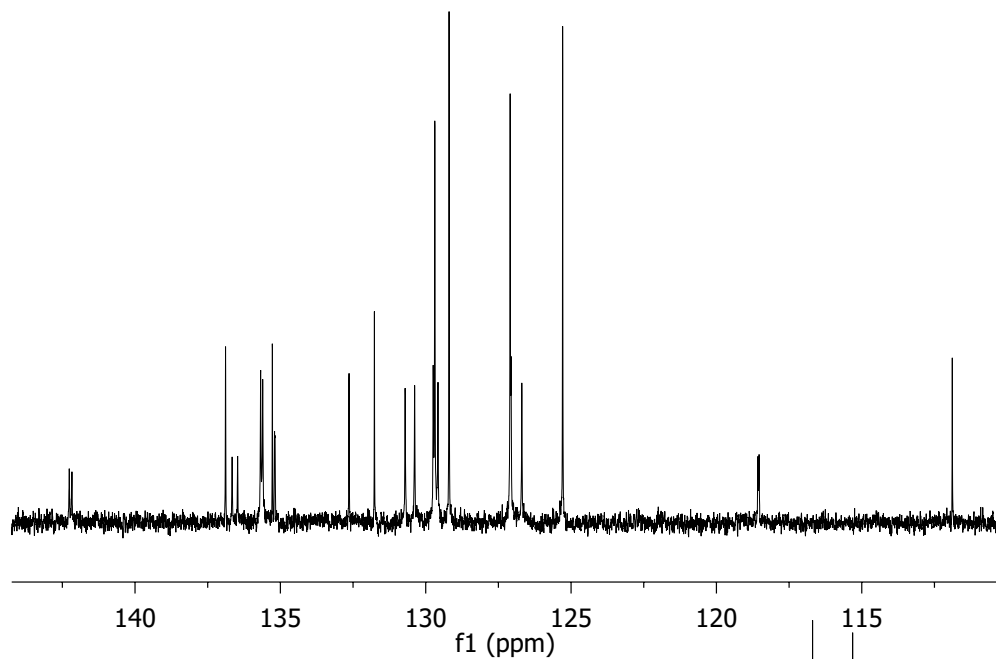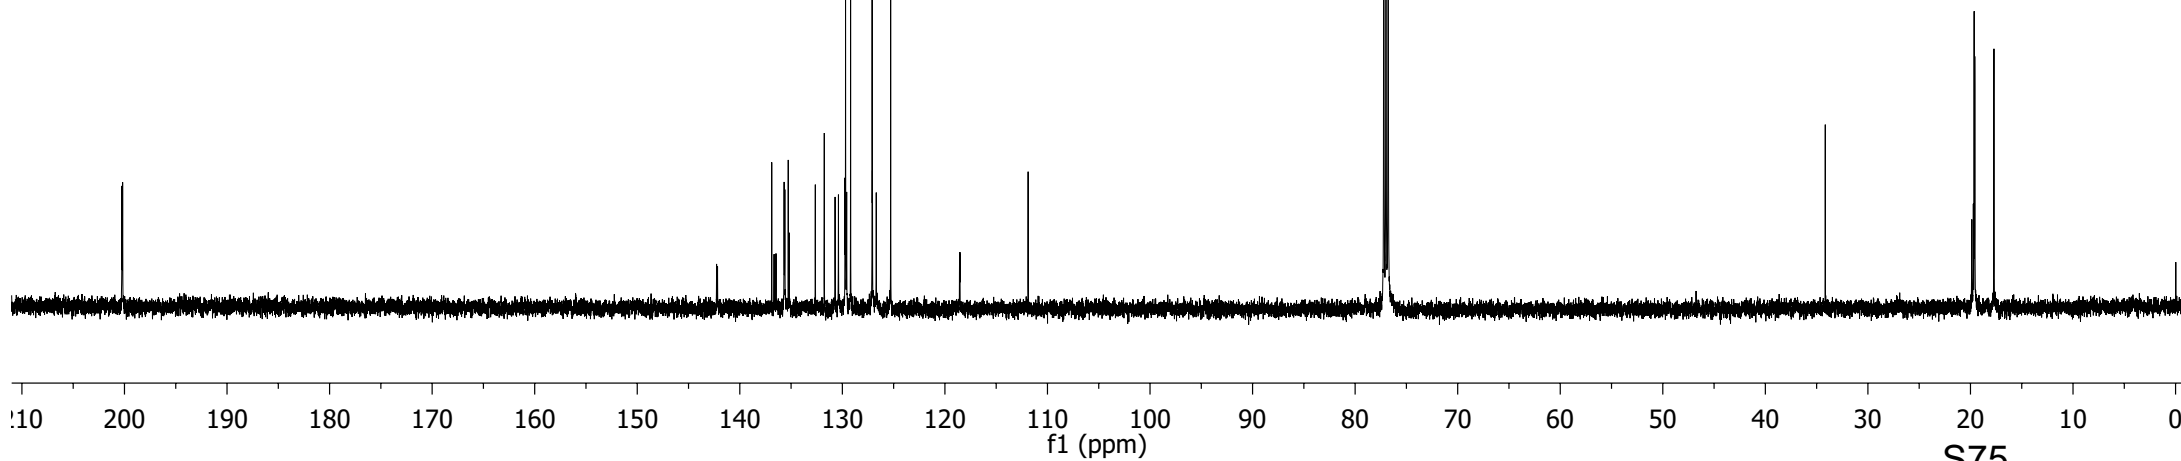

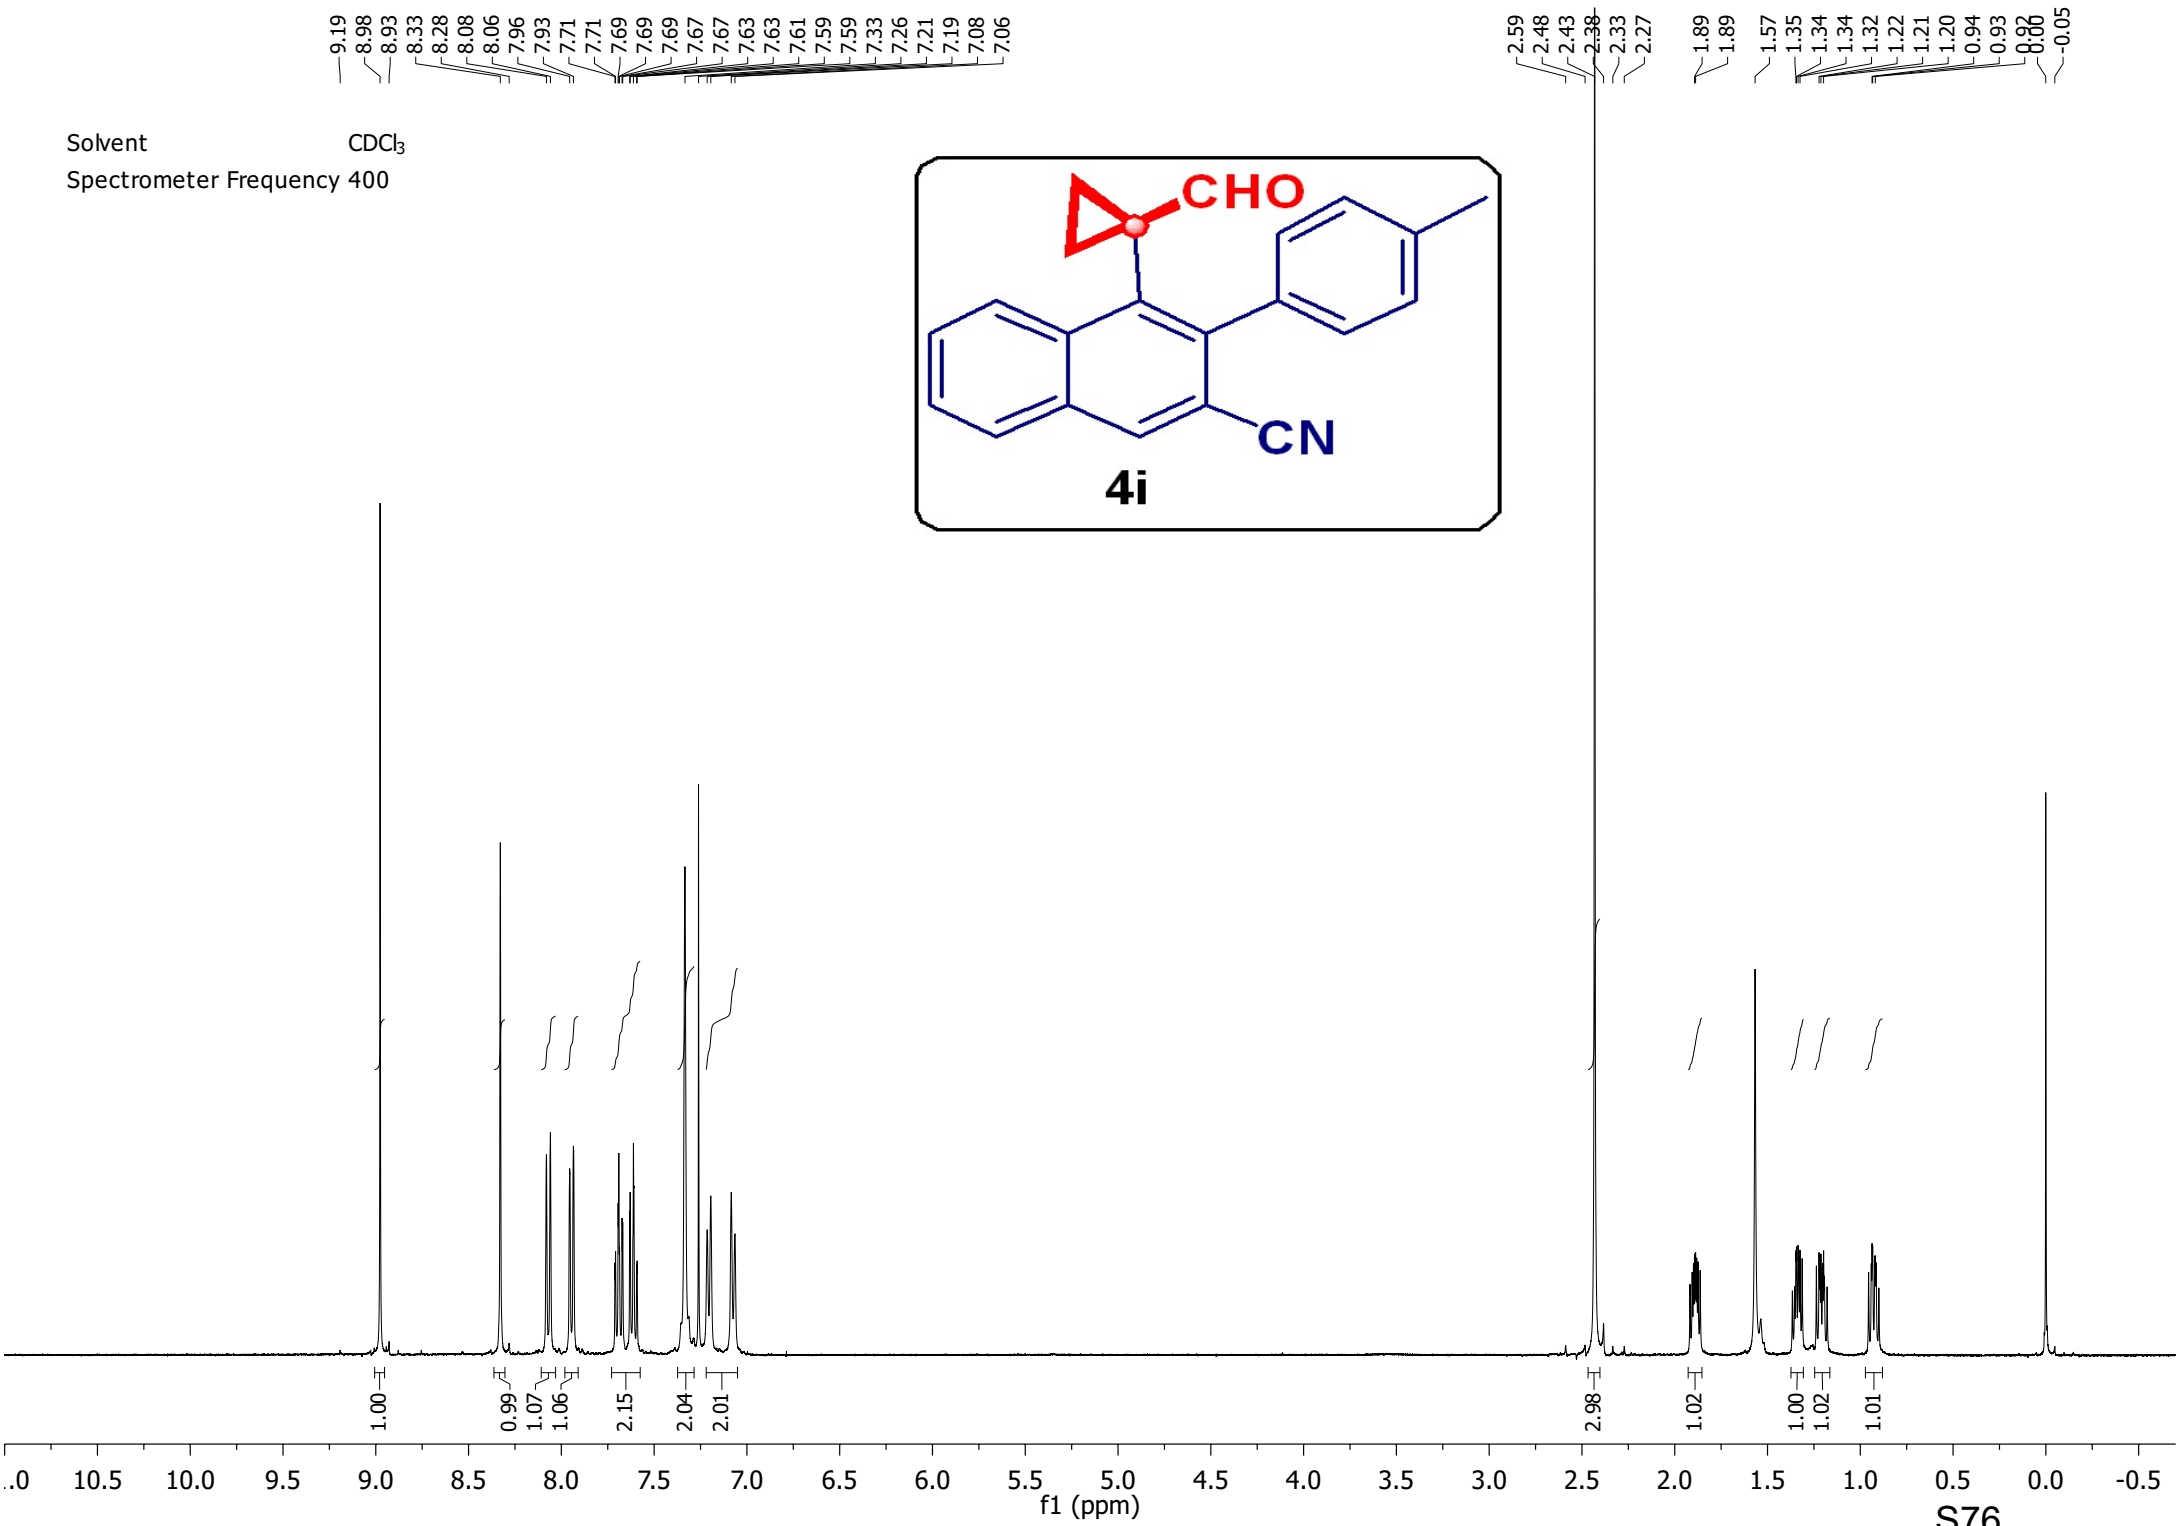

Solvent  $\text{CDCl}_3$   
Spectrometer Frequency 100

142.02  
138.30  
135.70  
135.23  
134.77  
132.69  
131.79  
129.75  
129.45  
129.22  
129.15  
127.17  
125.27  
118.52

142.02  
138.30  
135.70  
135.23  
134.77  
132.69  
131.79  
129.75  
129.45  
129.22  
129.15  
129.08  
127.17  
125.27  
118.52

111.91

77.31  
77.00  
76.68

34.20

21.36  
19.45  
17.60

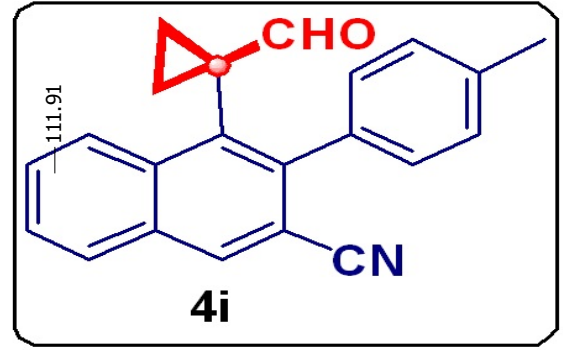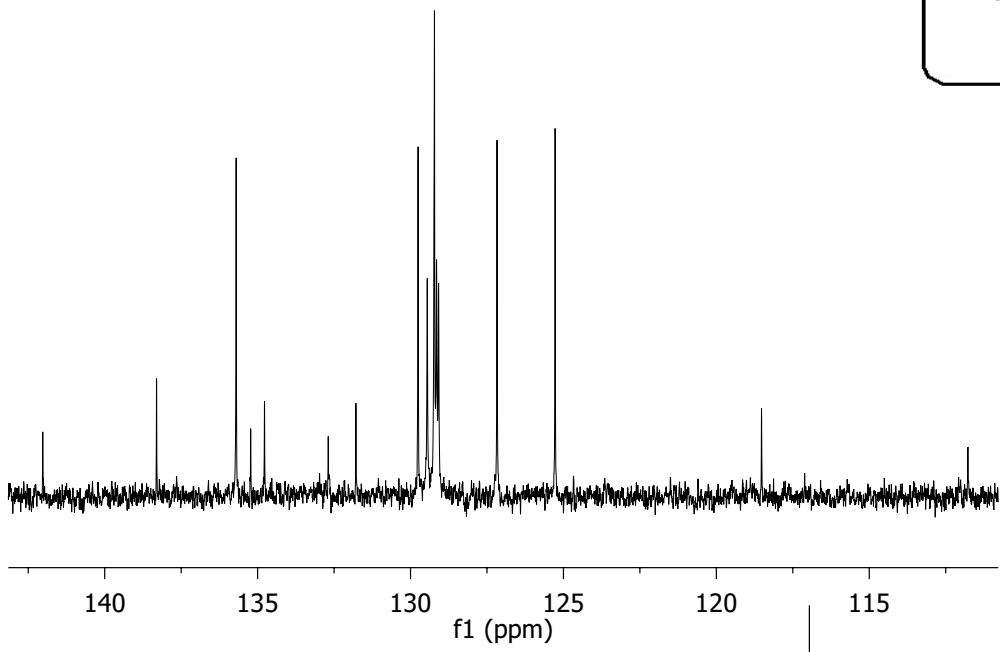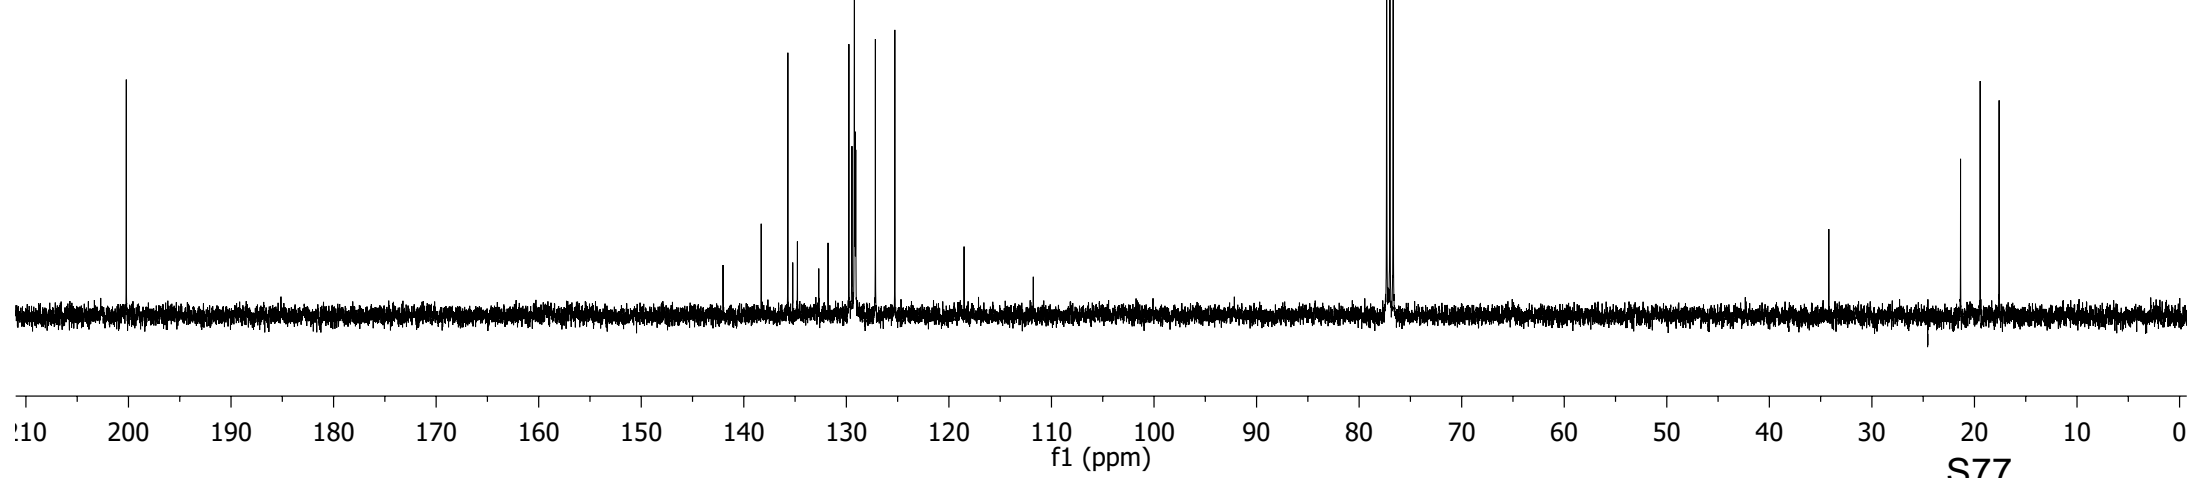

Solvent  $\text{CDCl}_3$   
Spectrometer Frequency 400

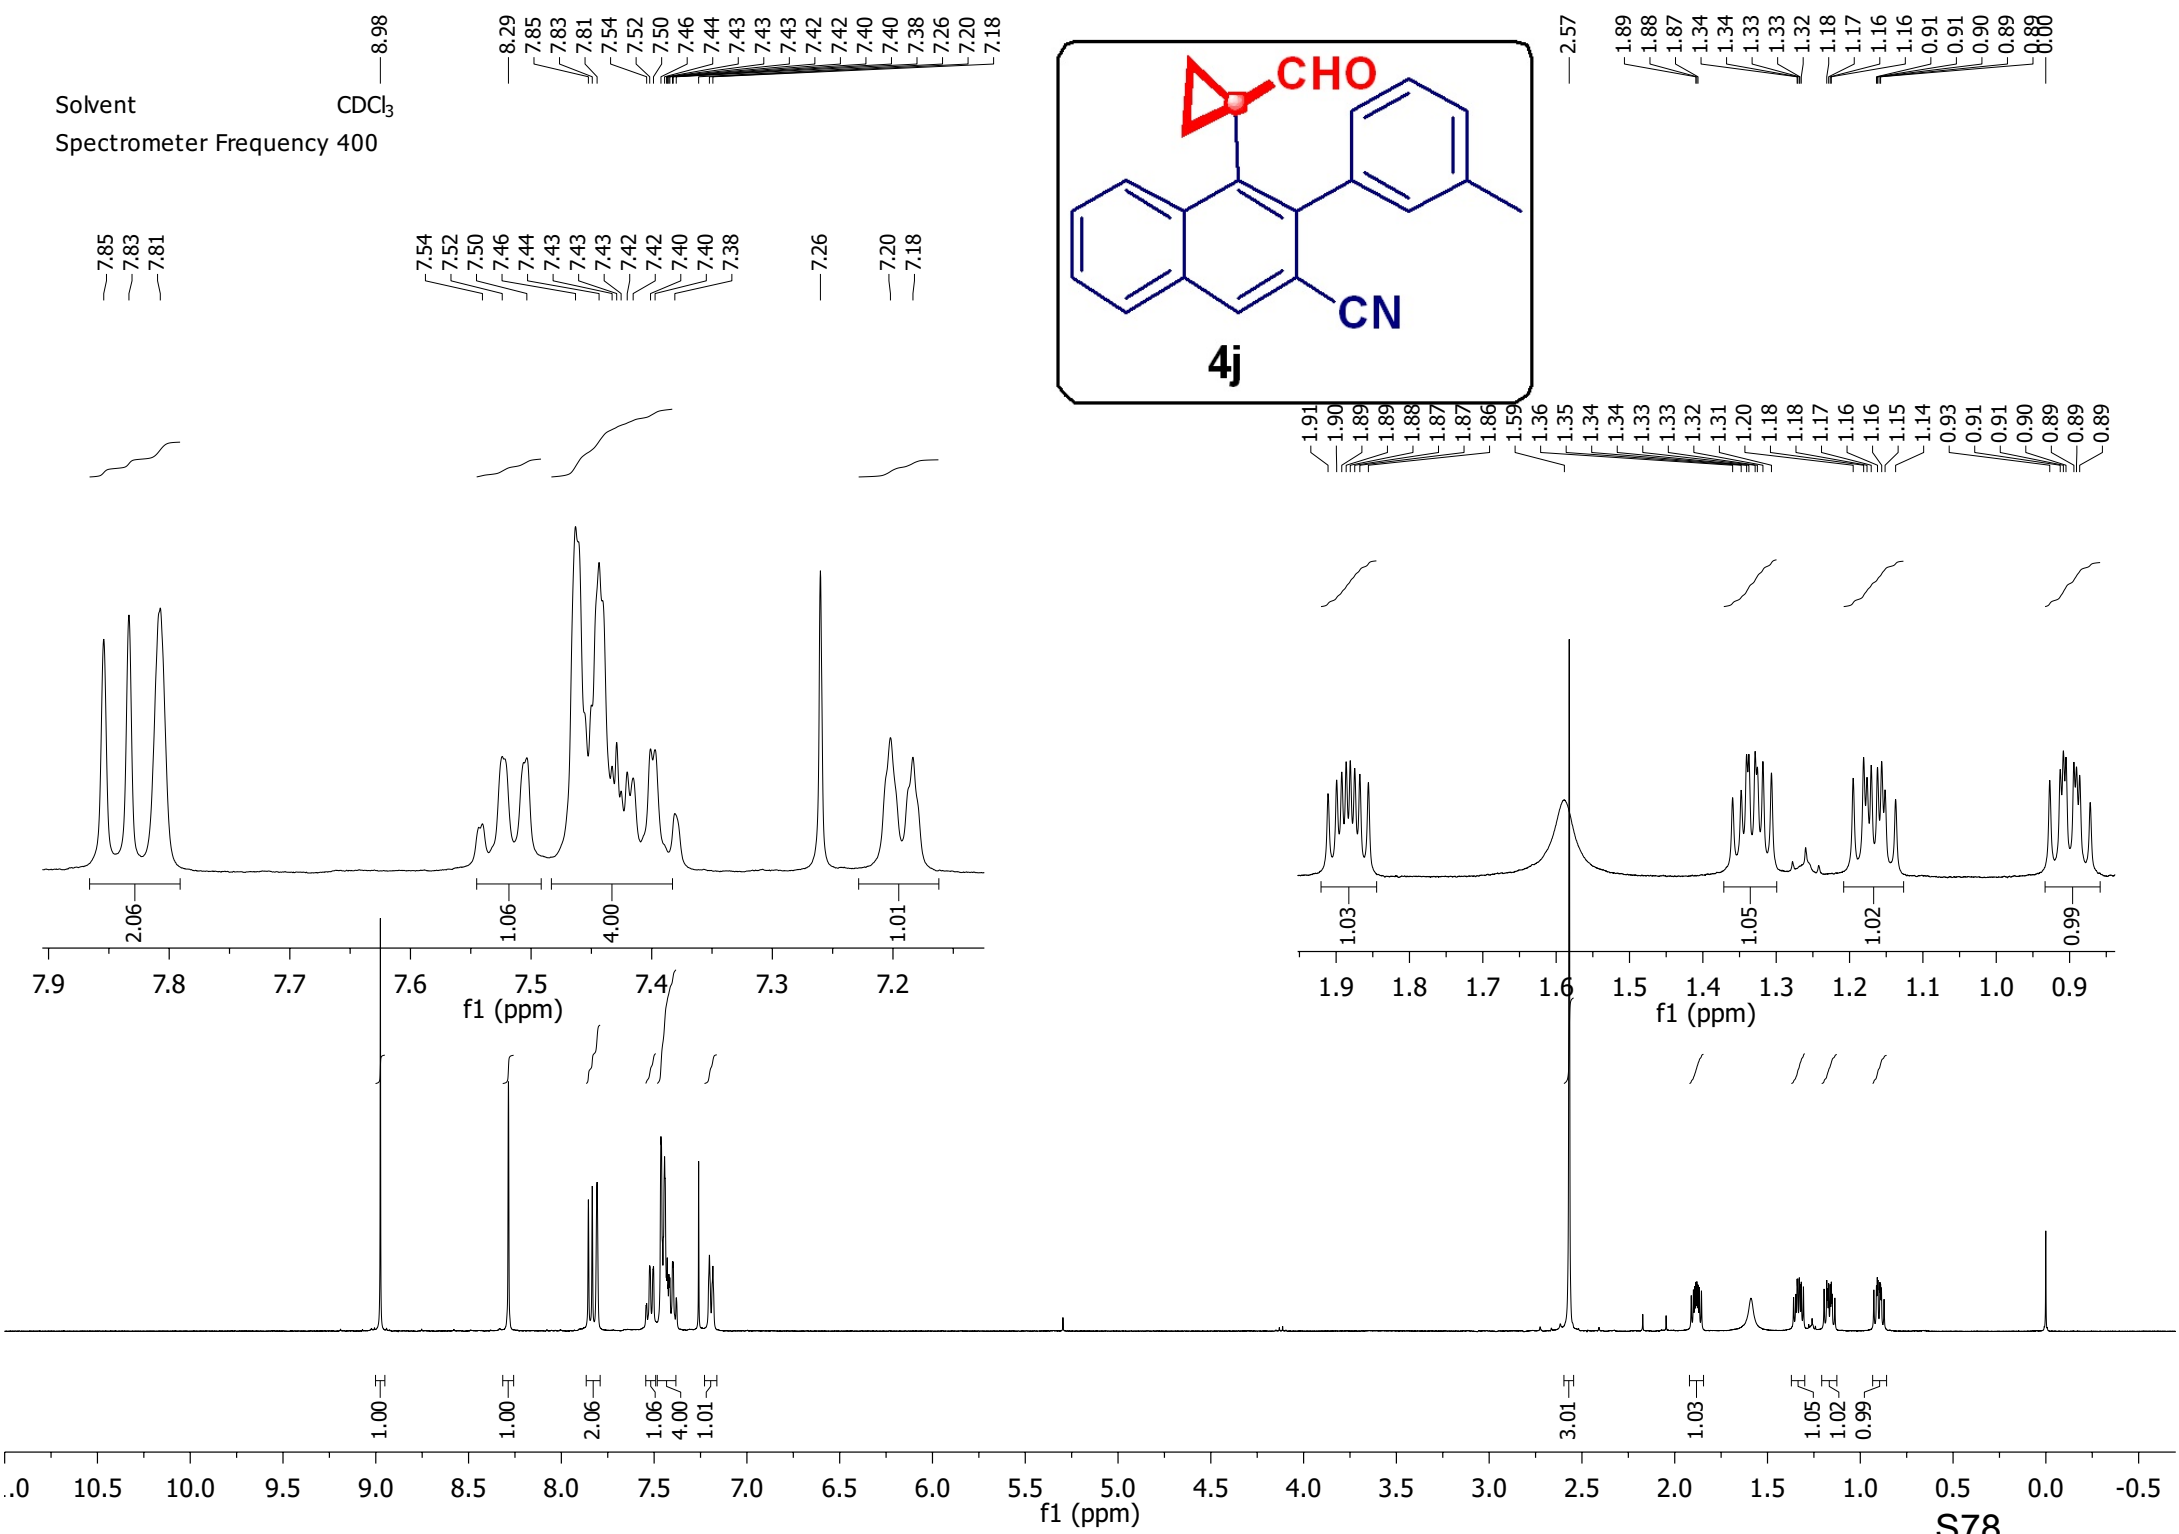

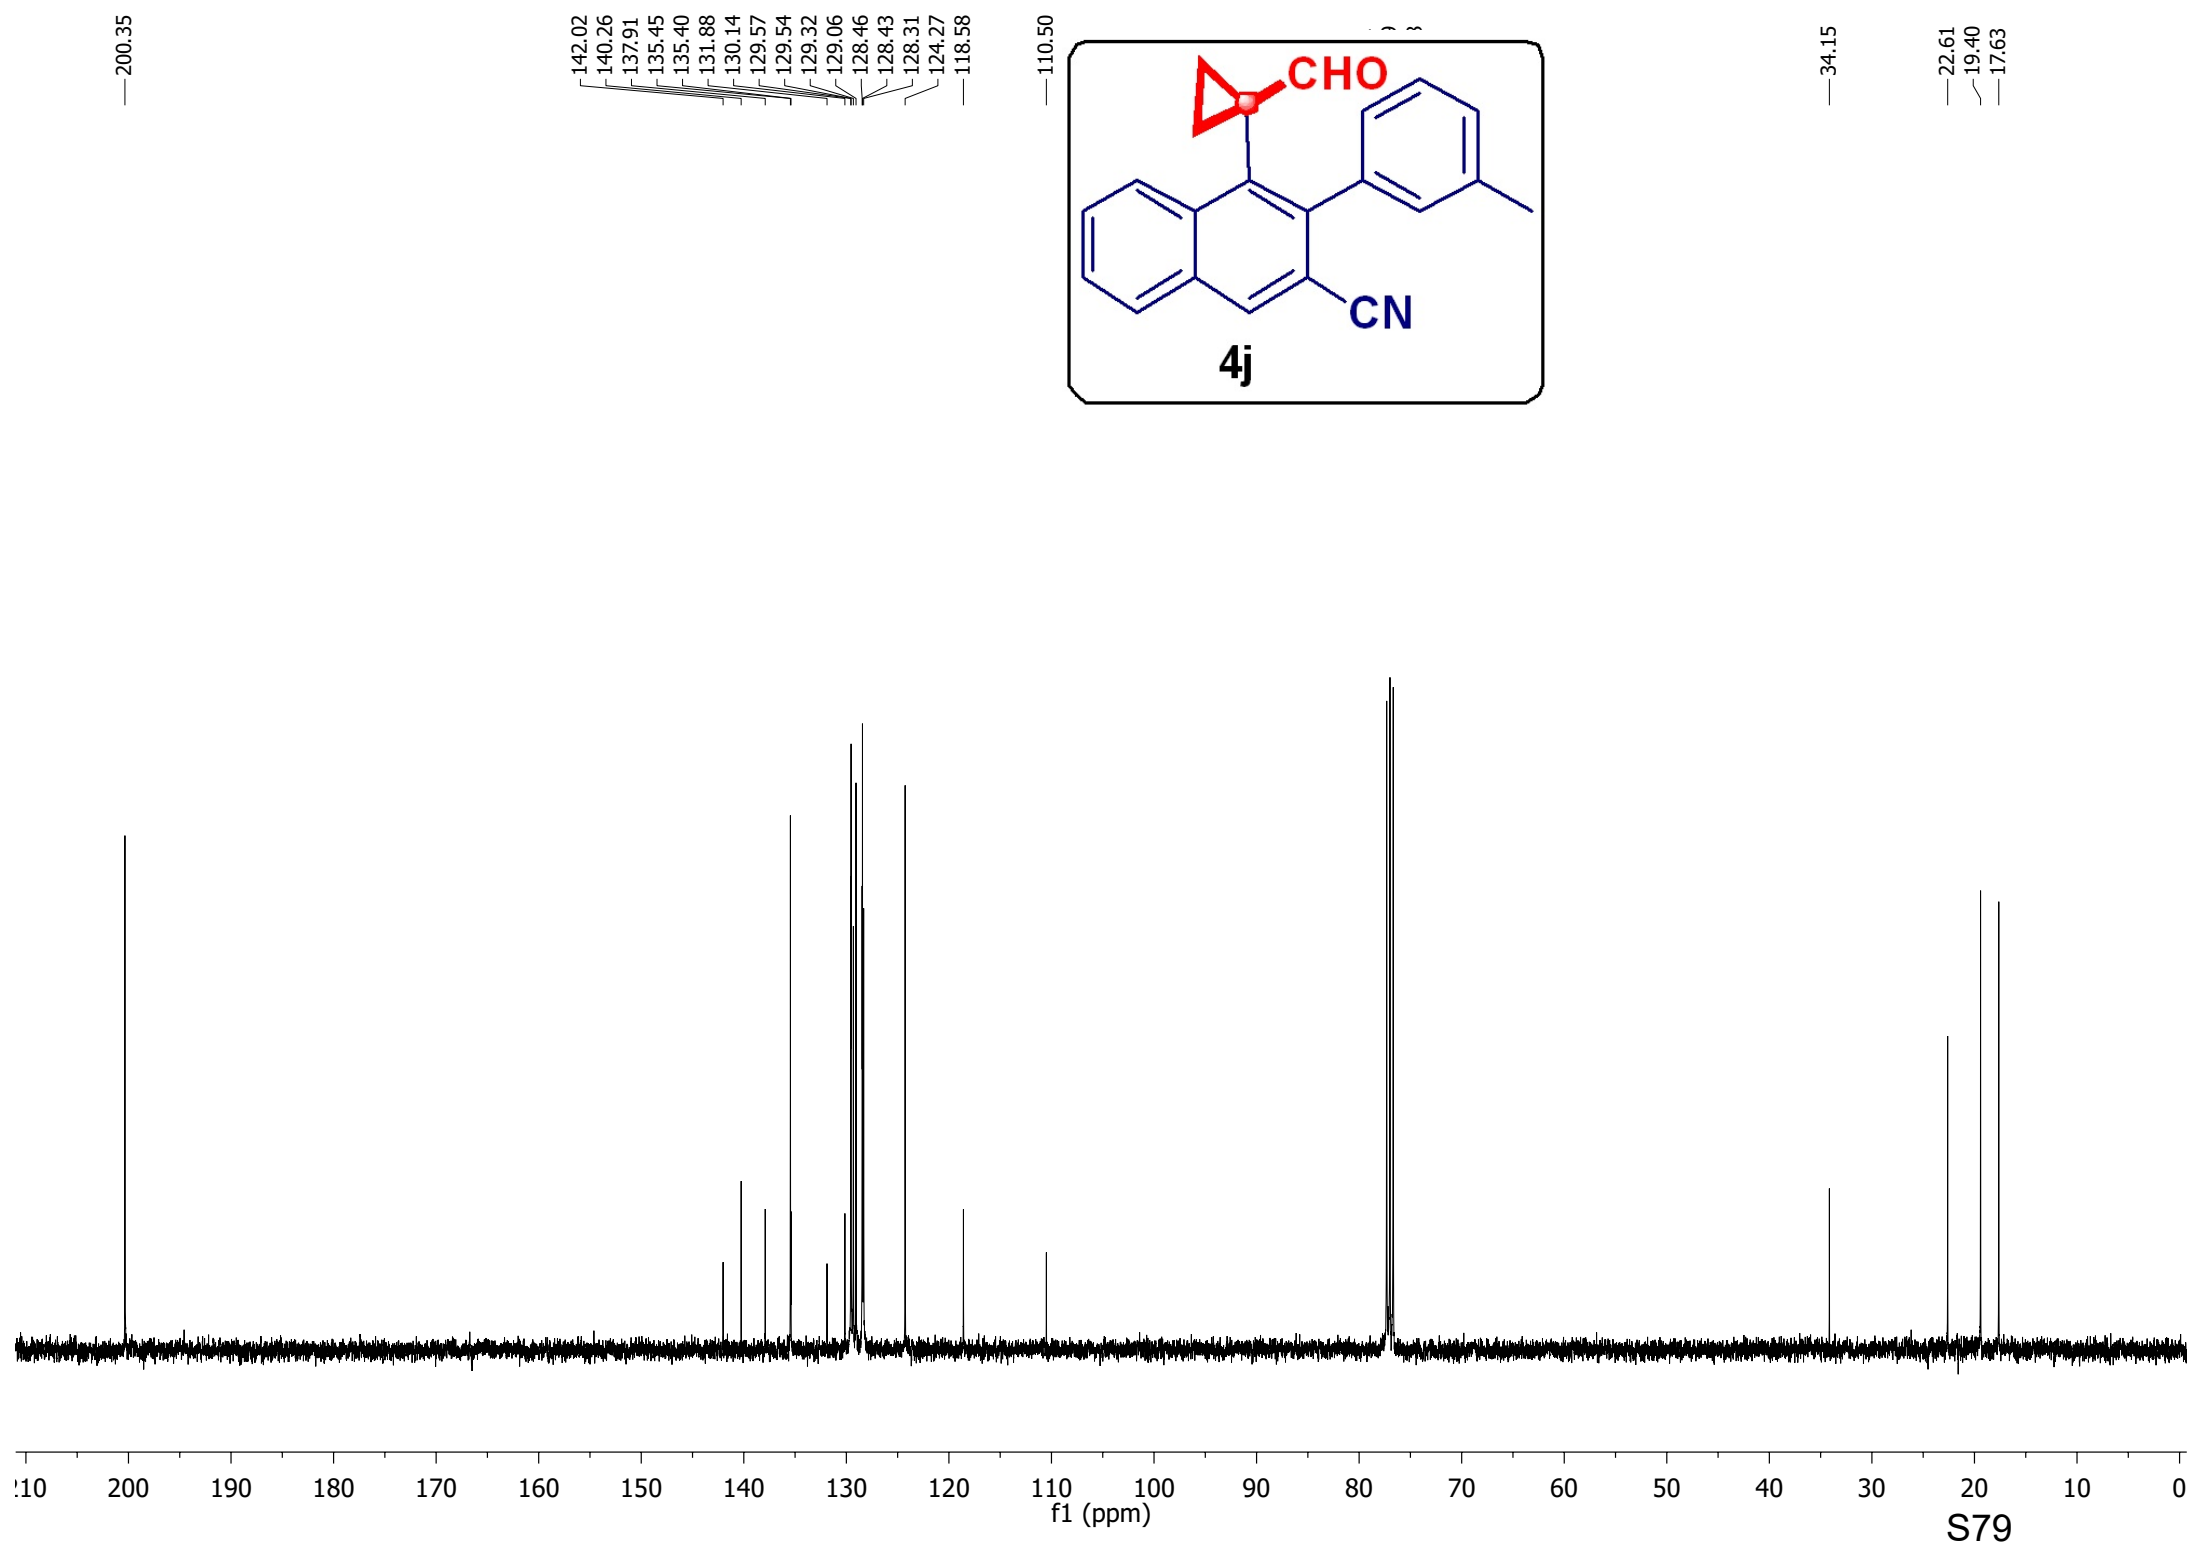

9.059 8.897 8.354 8.322 8.107 8.086 7.974 7.955 7.719 7.716 7.702 7.698 7.694 7.681 7.677 7.650 7.647 7.630 7.627 7.612 7.610 7.383 7.380 7.364 7.361 7.354 7.348 7.346 7.335 7.317 7.298 7.257 7.245 7.238 7.226 7.219 7.213 7.212 7.205 7.059 7.041 3.701

2.183 2.167 1.995 1.910 1.898 1.892 1.885 1.880 1.874 1.867 1.855 1.408 1.404 1.396 1.393 1.385 1.124 1.105 1.099 0.892 0.888 0.878 0.000

Solvent CDCl<sub>3</sub>  
Spectrometer Frequency 400

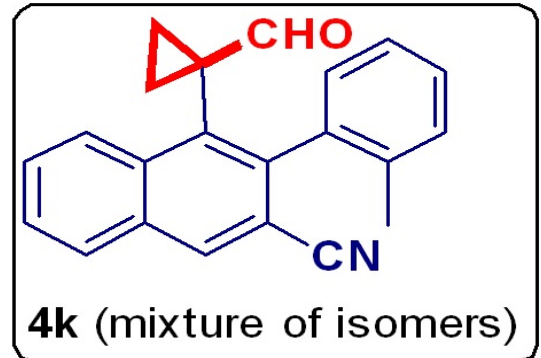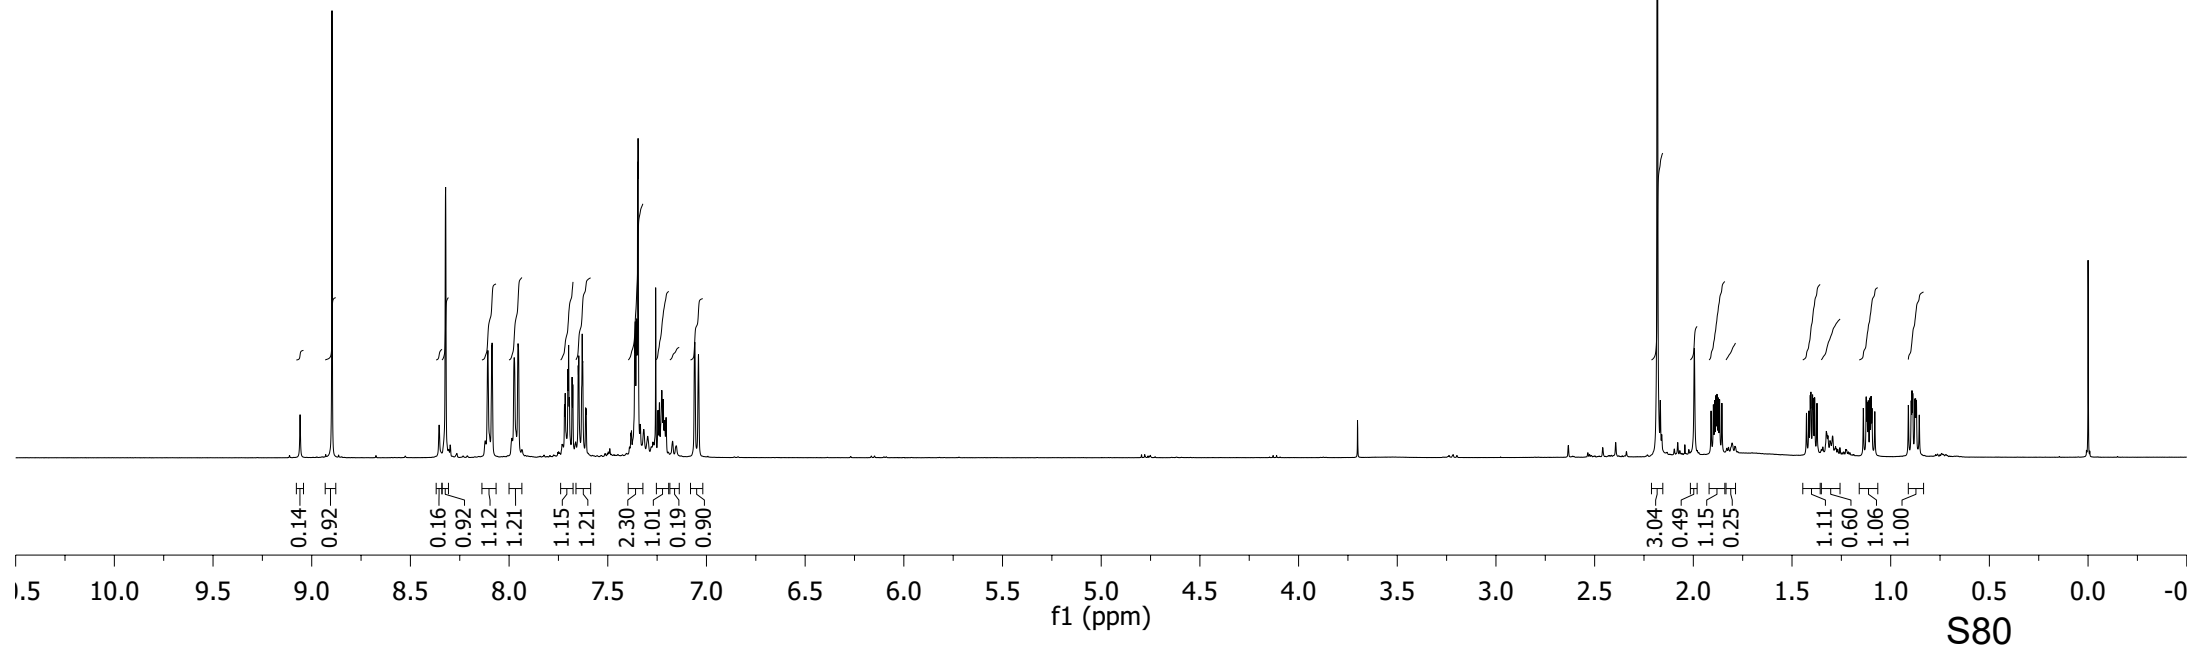

S80



199.69  
199.51  
141.71  
137.49  
135.57  
135.42  
135.36  
135.20  
132.68  
132.01  
131.91  
130.71  
130.33  
129.91  
129.79  
129.72  
129.59  
129.30  
128.87  
128.70  
127.31  
127.26  
126.14  
125.44  
125.35  
125.21  
118.04

Solvent  $\text{CDCl}_3$   
Spectrometer Frequency 150

77.21  
76.99  
76.78

33.97

19.87  
19.81  
19.74  
18.62  
17.80  
16.08

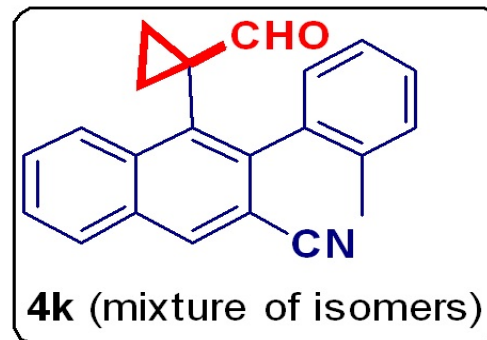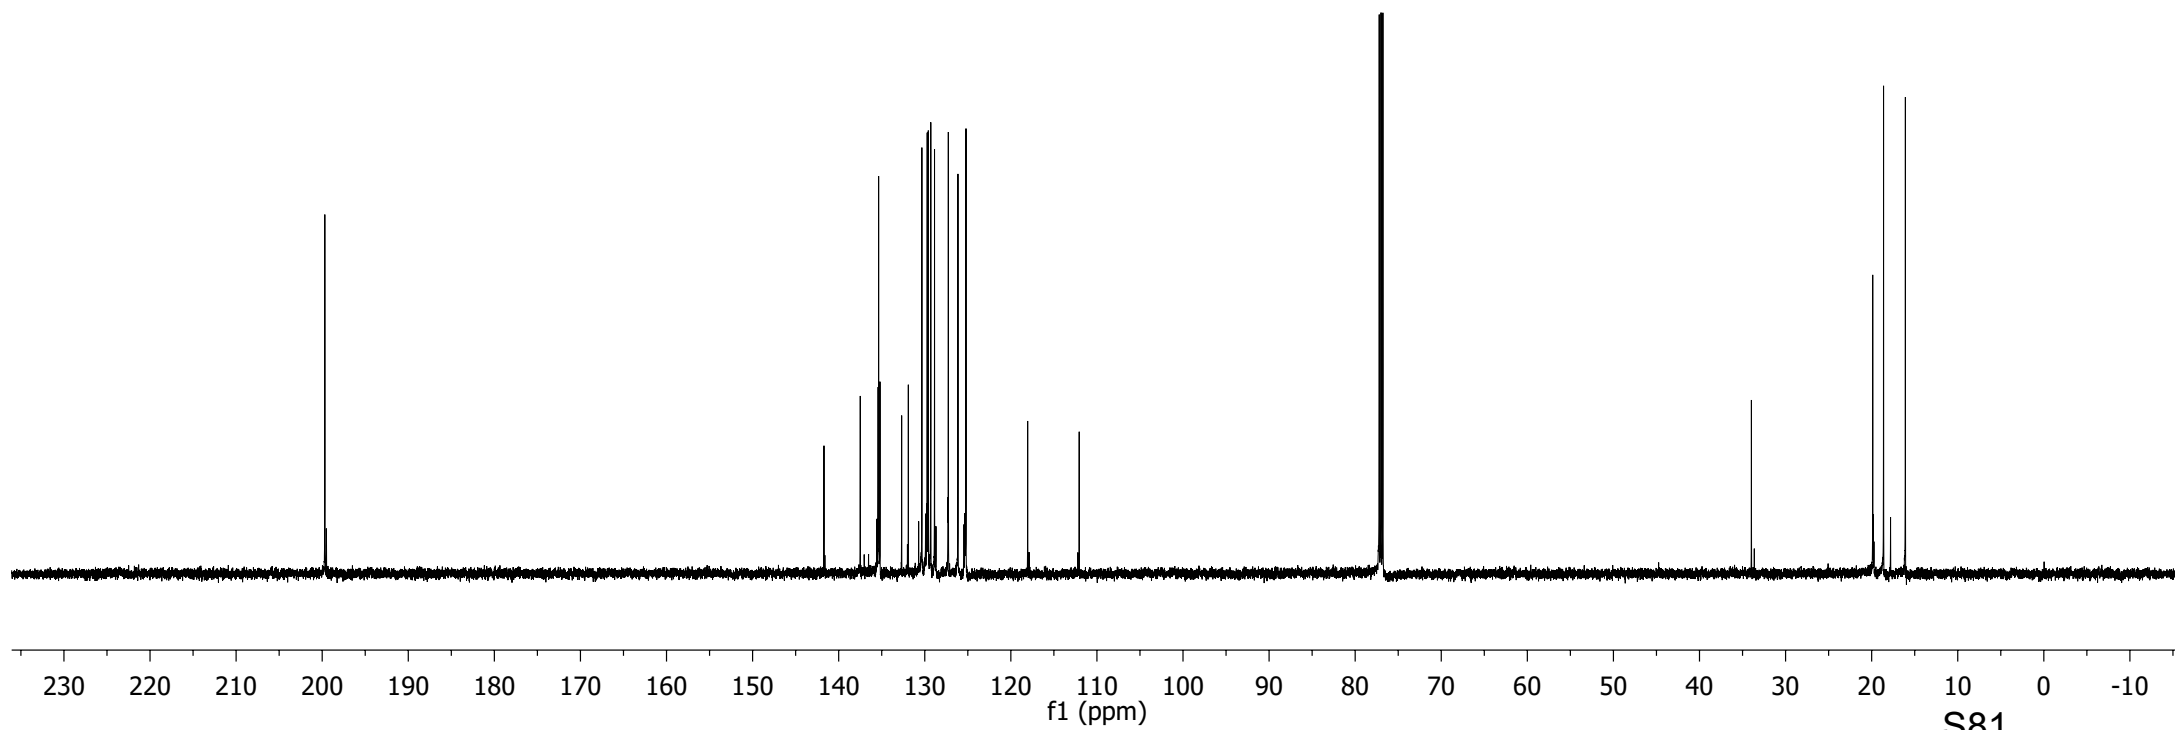

Solvent CDCl<sub>3</sub>  
Spectrometer Frequency 400

8.91 8.34 8.08 8.06 7.96 7.94 7.73 7.71 7.70 7.69 7.65 7.63 7.61 7.53 7.52 7.51 7.50 7.42 7.41 7.40 7.40 7.38 7.38 7.26 7.26 7.17 7.16 7.15 7.14 1.95 1.93 1.93 1.92 1.91 1.91 1.90 1.89 1.38 1.37 1.36 1.26 0.92 0.91 0.91 0.90 0.89 0.88 0.00

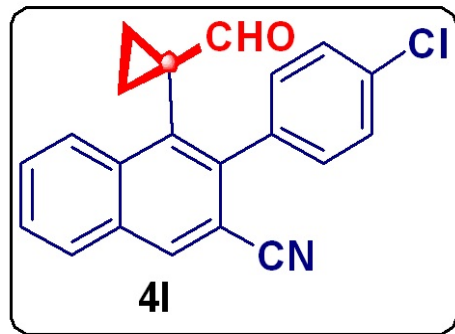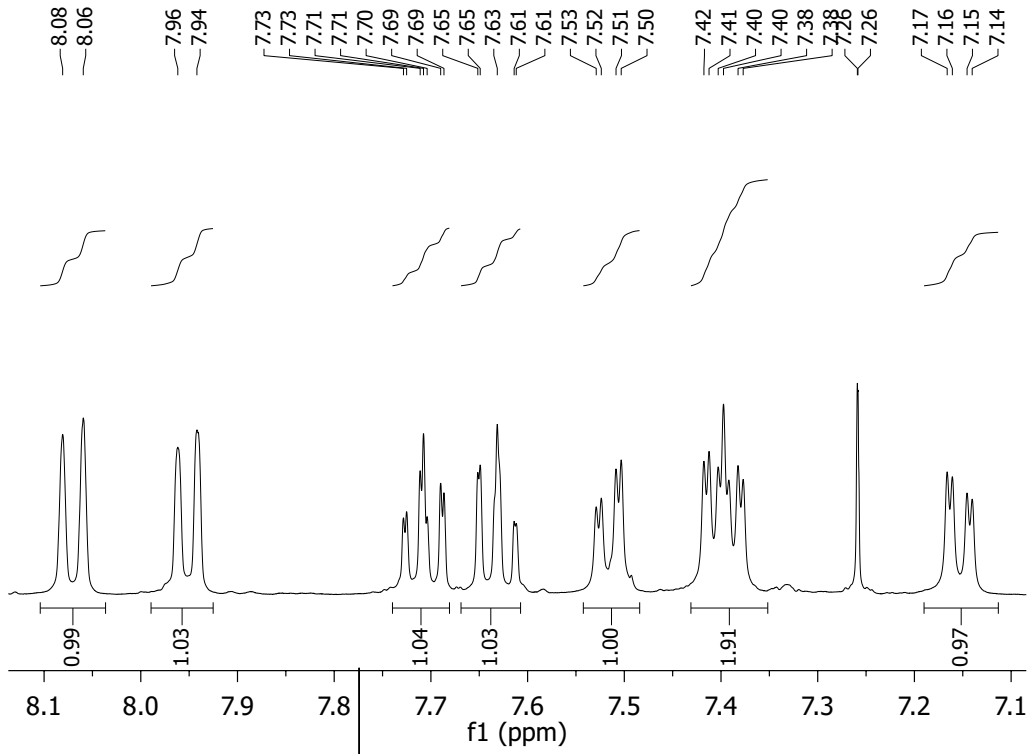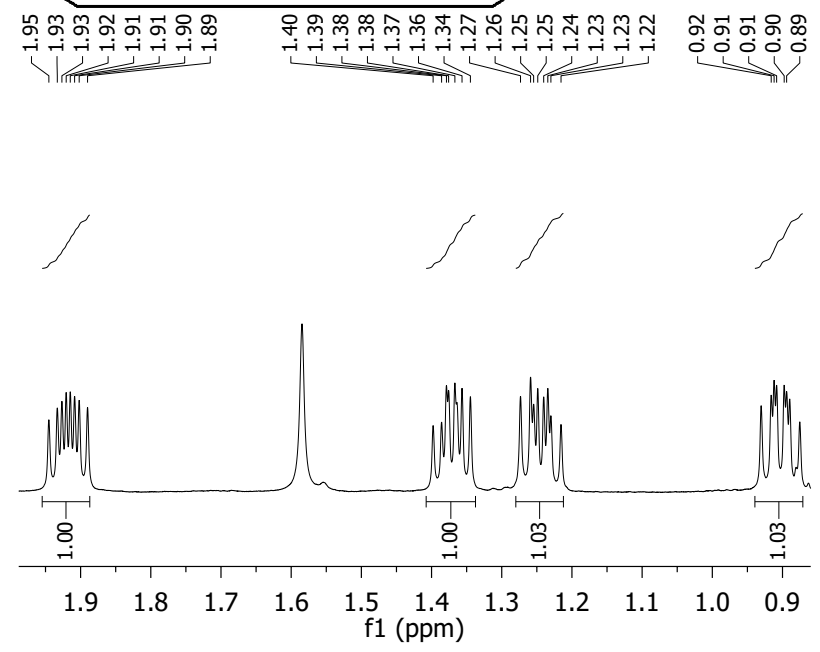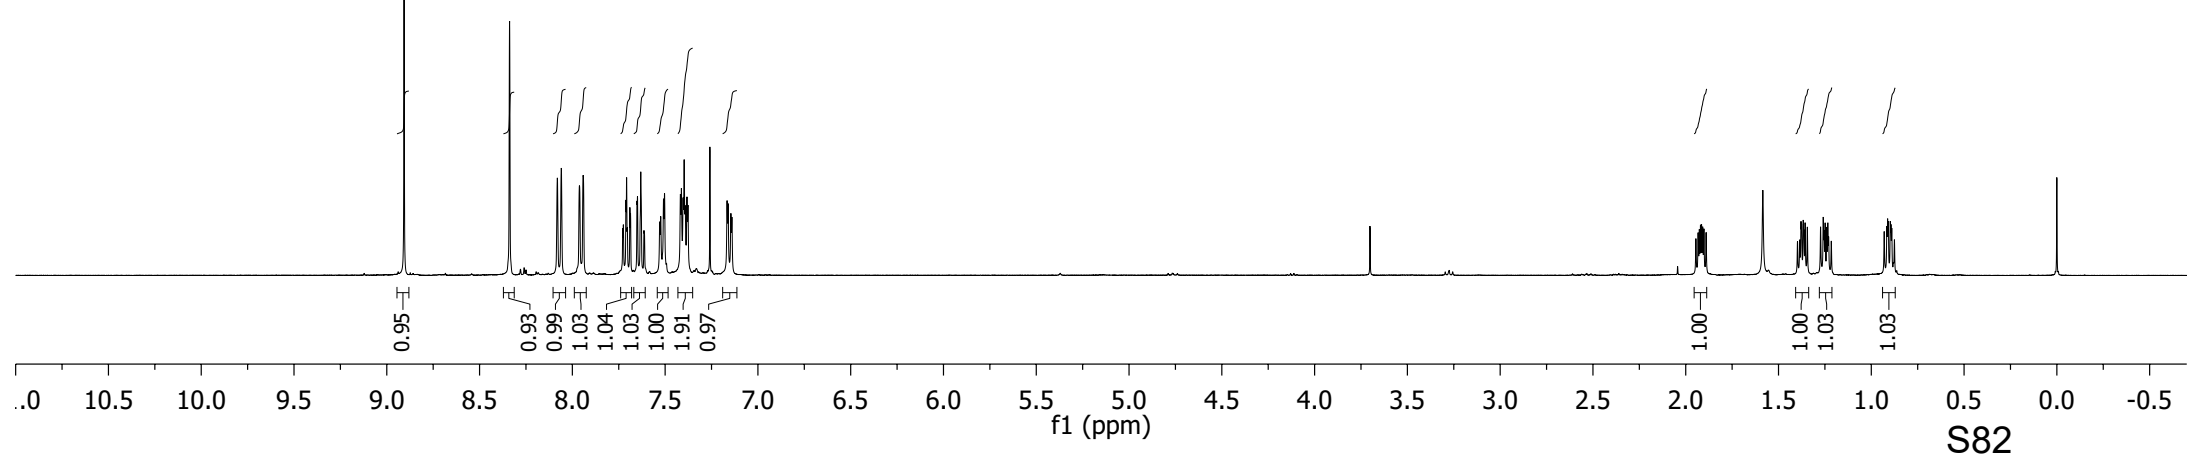

Solvent  $\text{CDCl}_3$   
Spectrometer Frequency 100

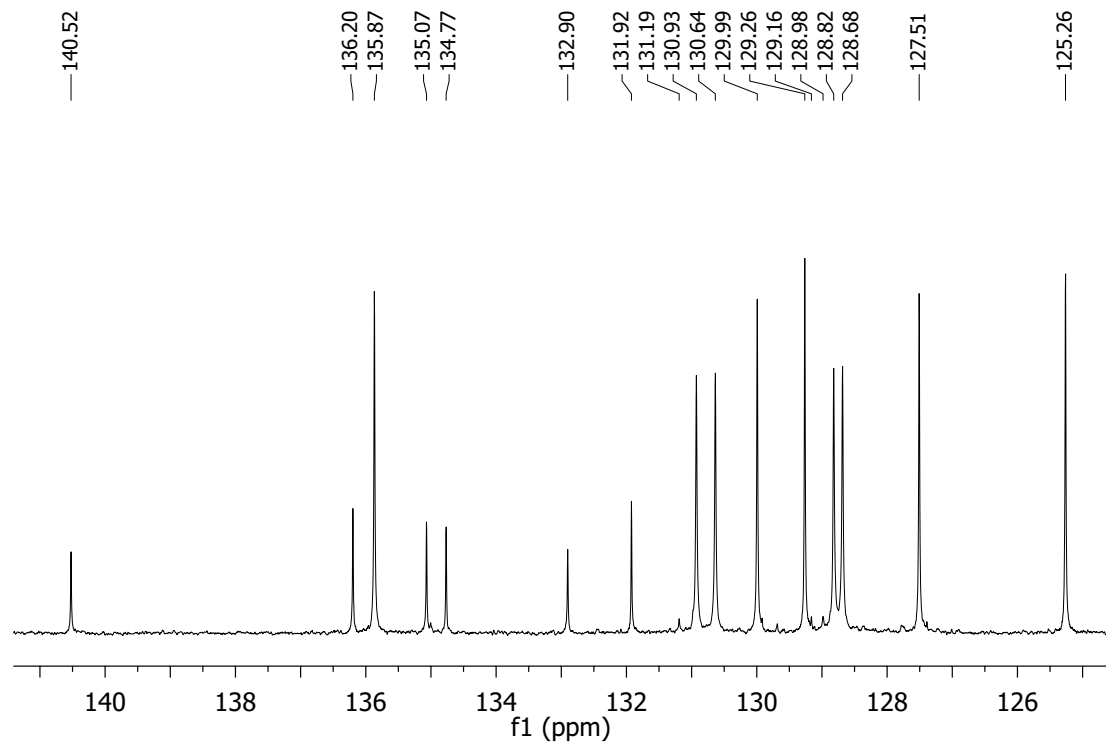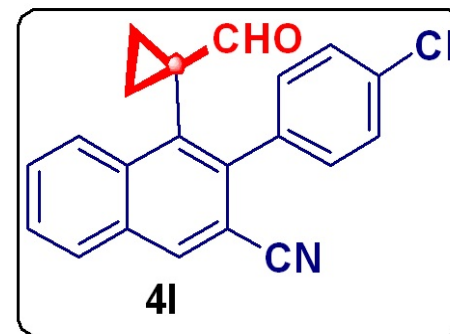

77.31  
77.20  
77.00  
76.68

67.05

34.25

19.02  
17.29

-0.03

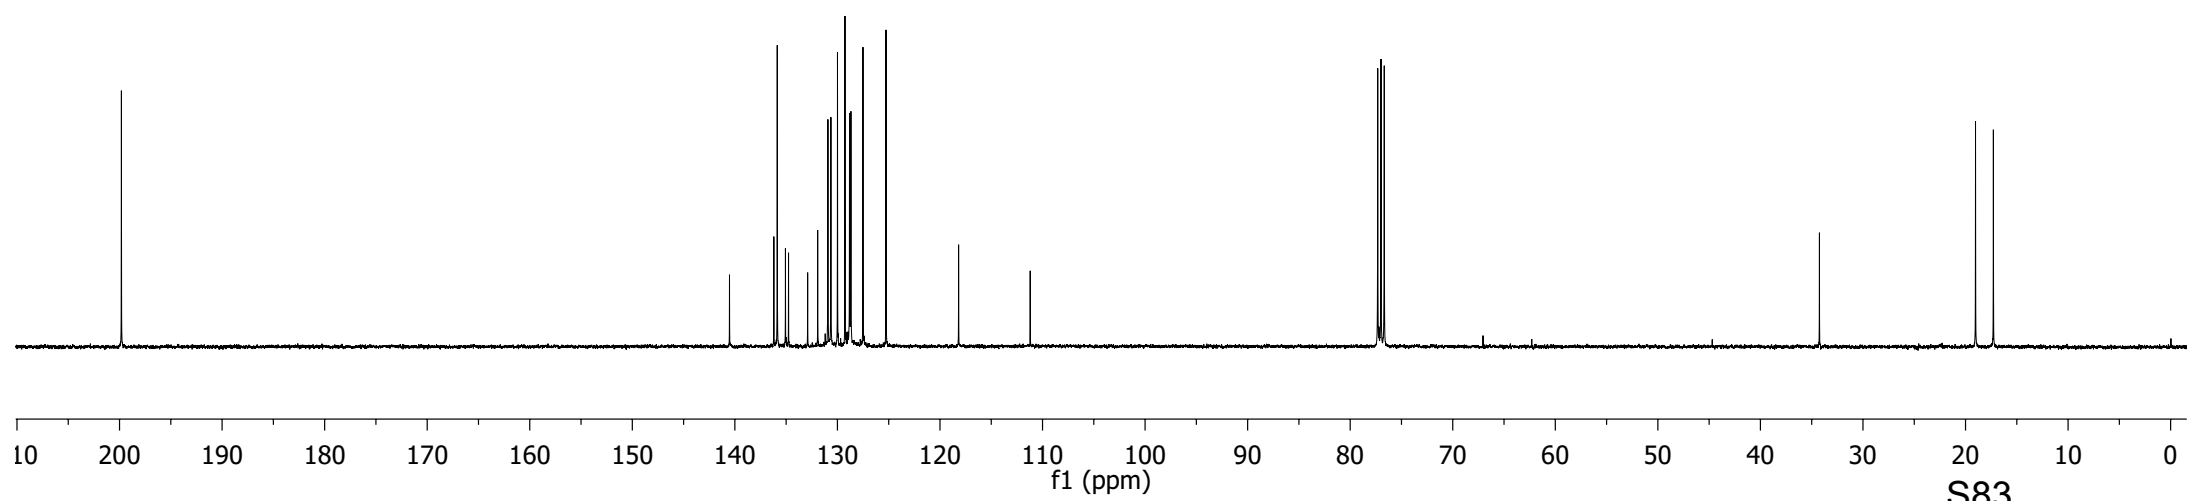

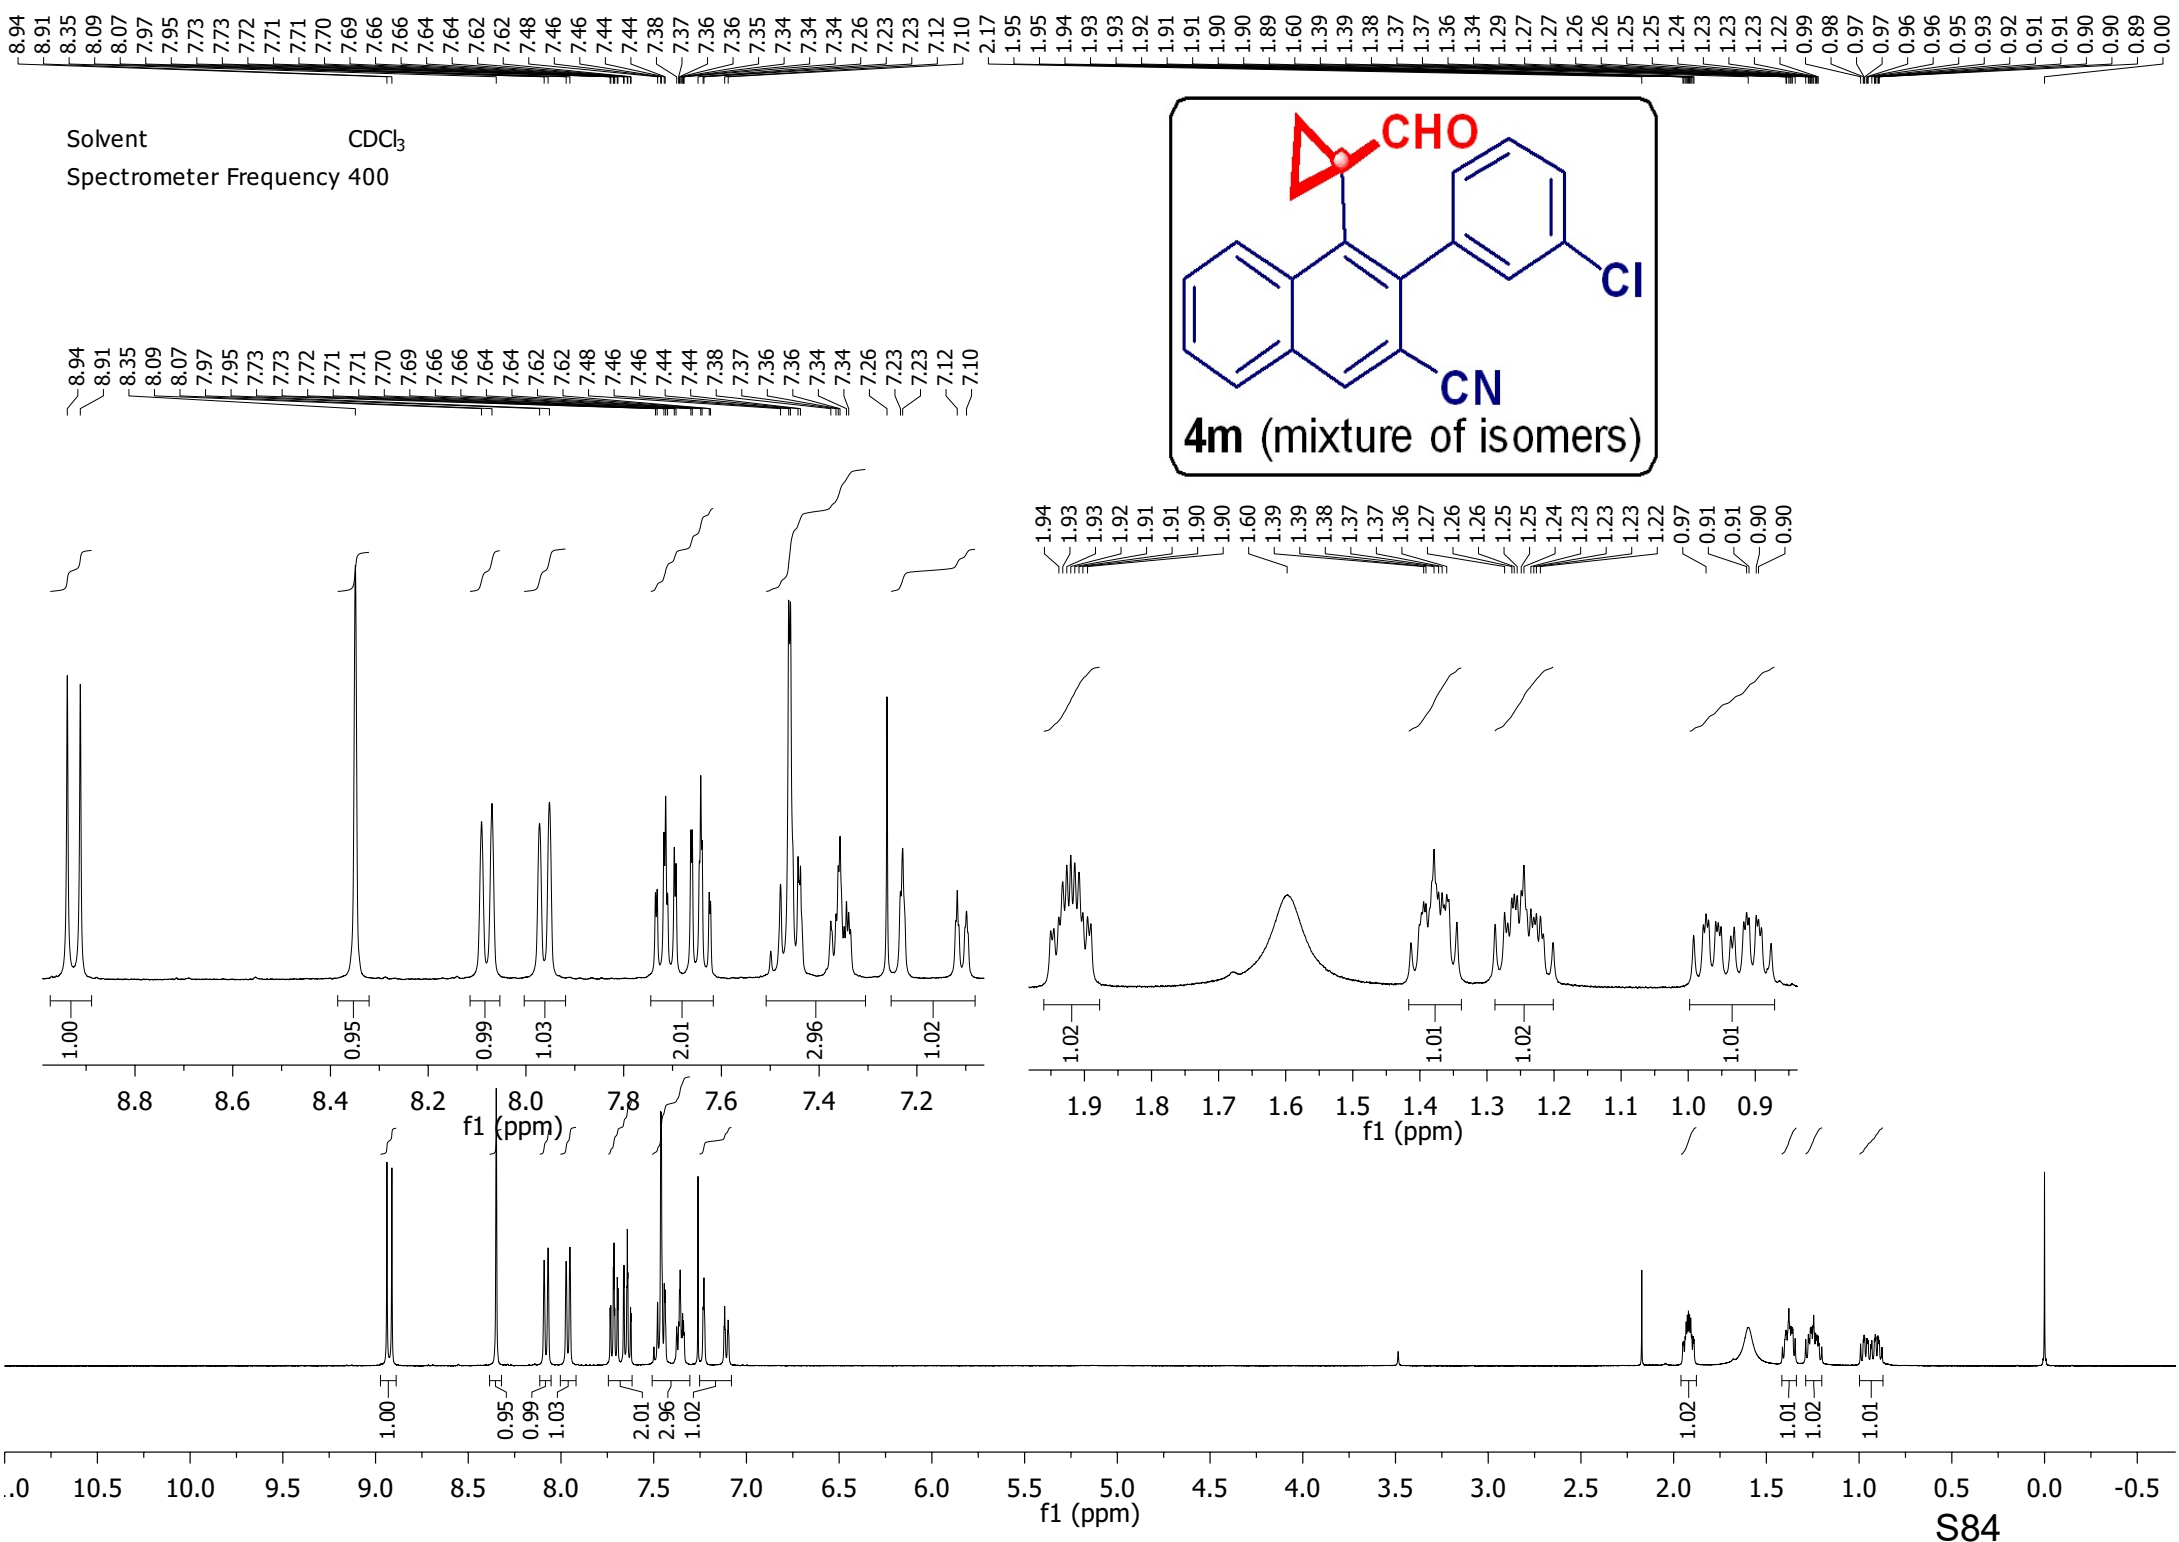

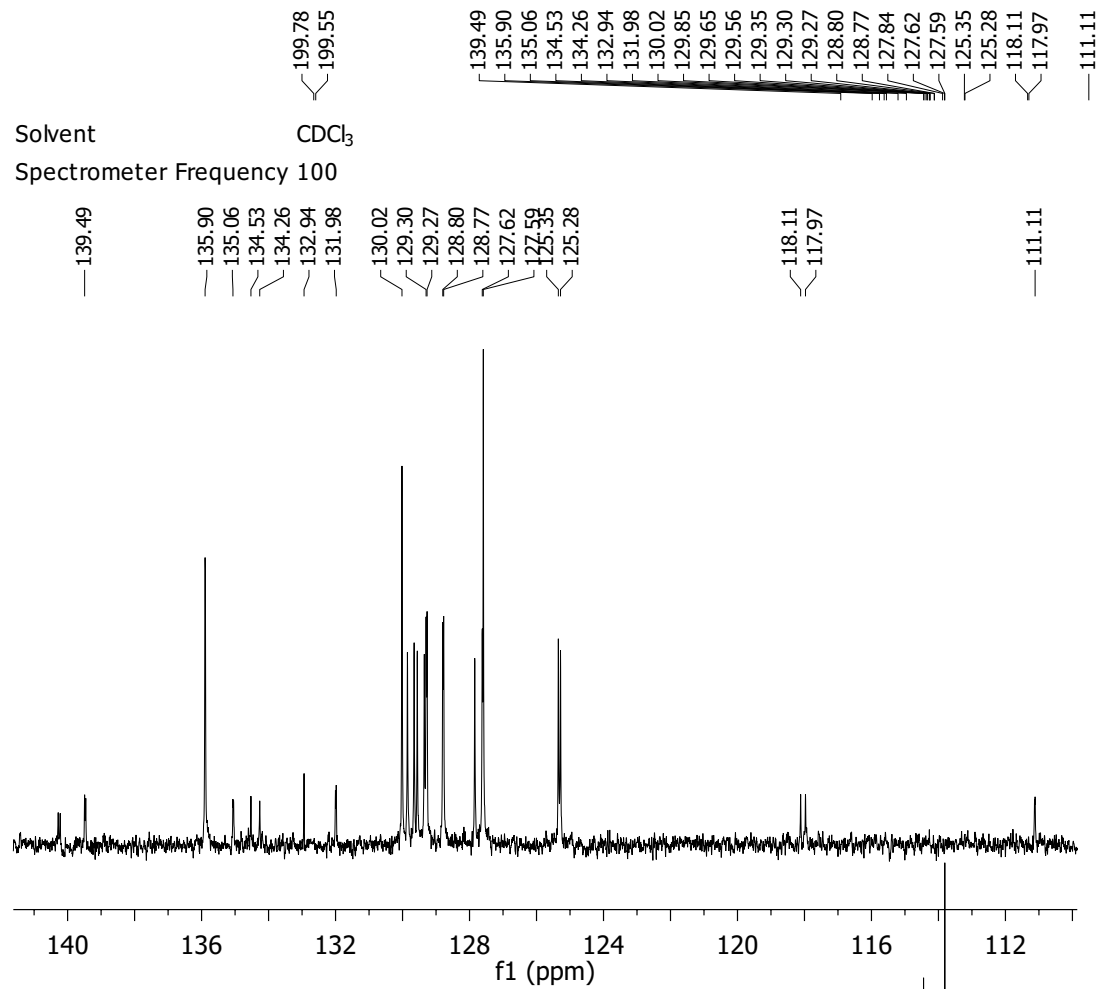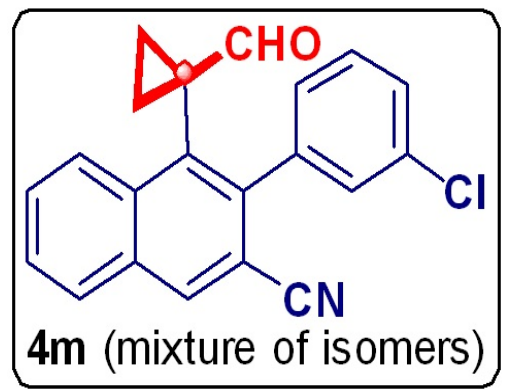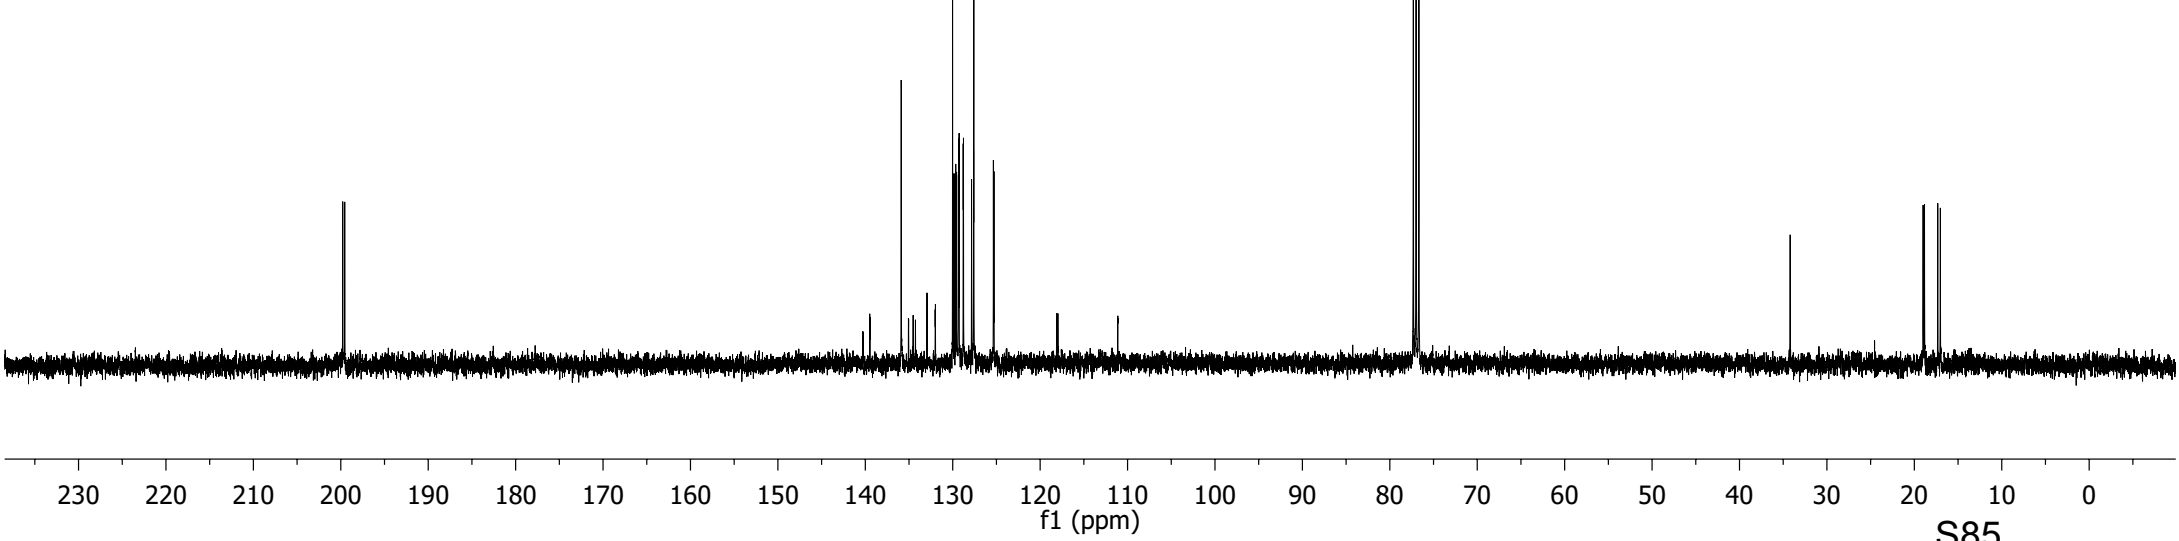

Solvent  $\text{CDCl}_3$   
Spectrometer Frequency 400

8.94  
8.91  
8.35  
8.09  
8.07  
7.97  
7.95  
7.73  
7.71  
7.70  
7.66  
7.64  
7.62  
7.59  
7.44  
7.42  
7.41  
7.40  
7.39  
7.31  
7.29  
7.27  
7.26  
7.17  
7.15

5.30

1.95  
1.93  
1.93  
1.92  
1.91  
1.91  
1.90  
1.57  
1.39  
1.38  
1.37  
1.36  
1.28  
1.26  
1.26  
1.25  
0.97  
0.90  
0.88

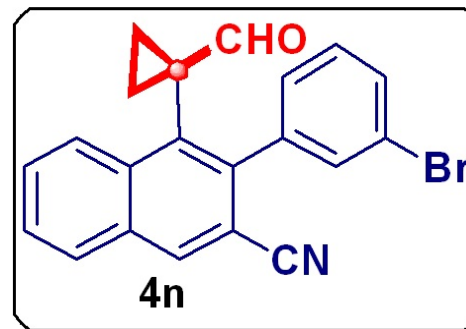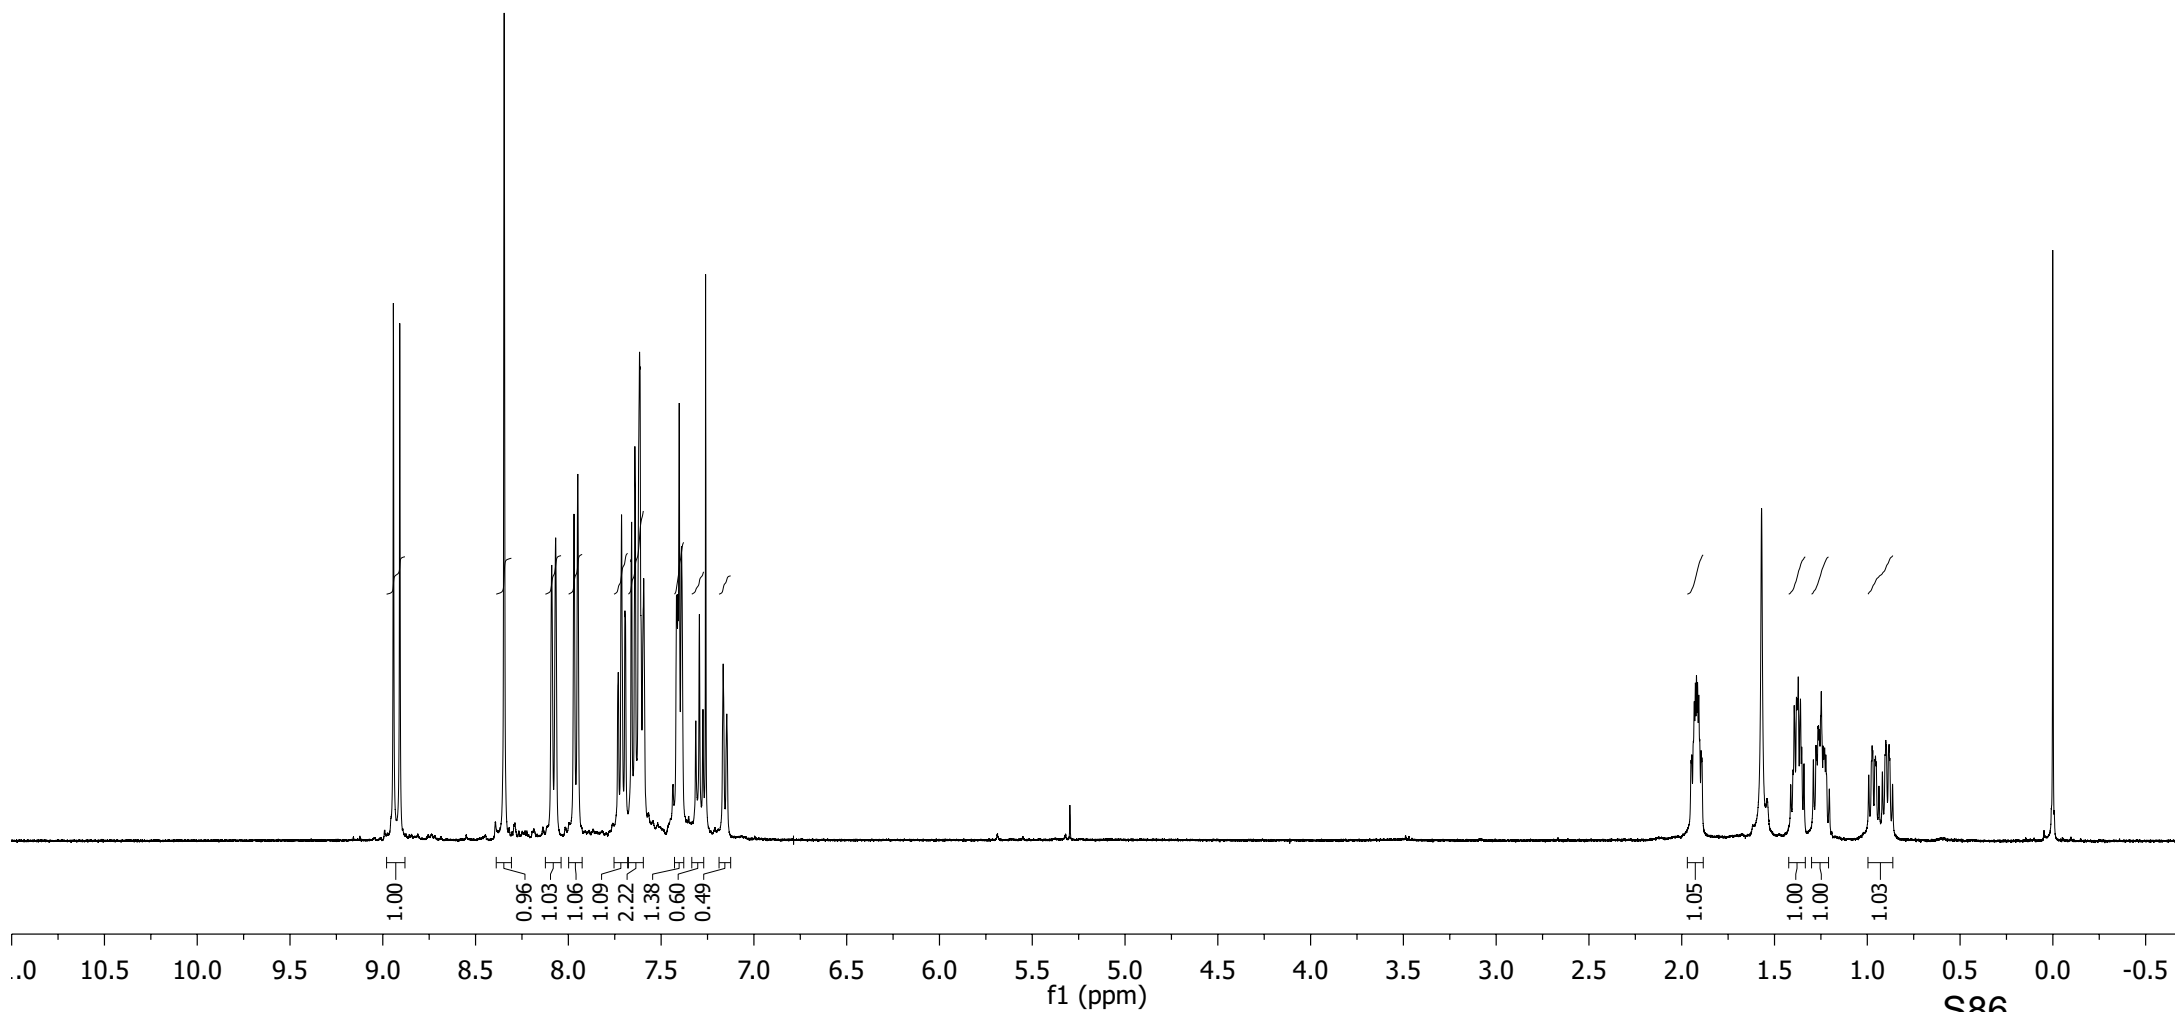

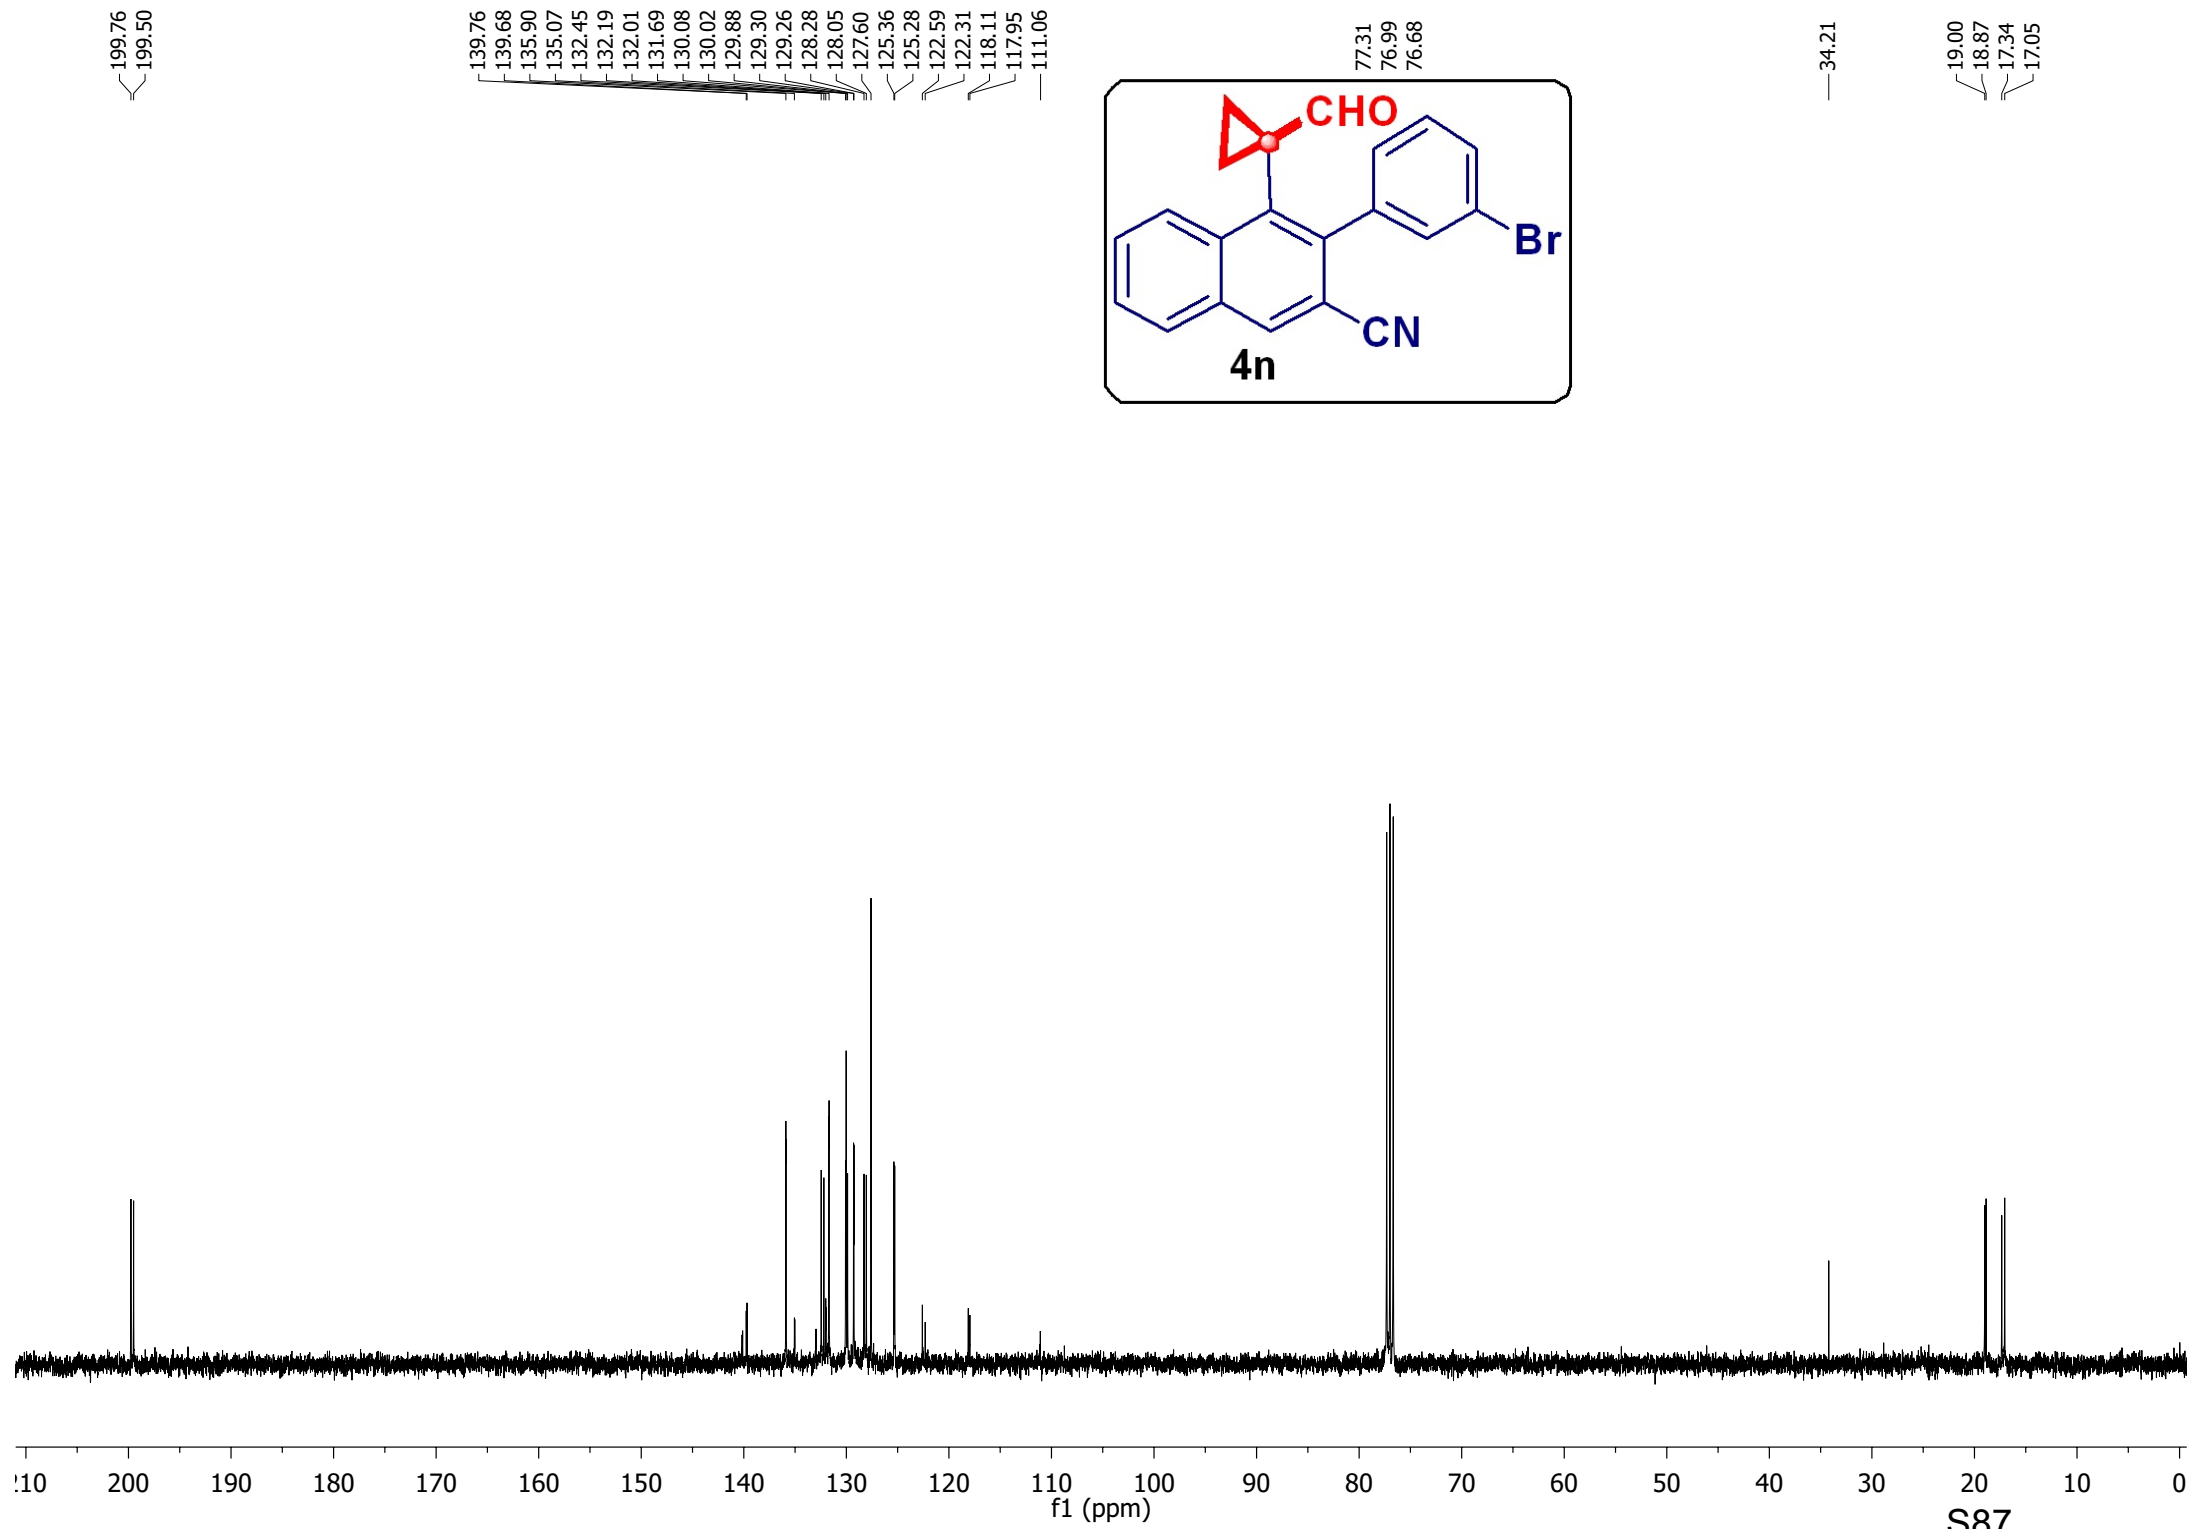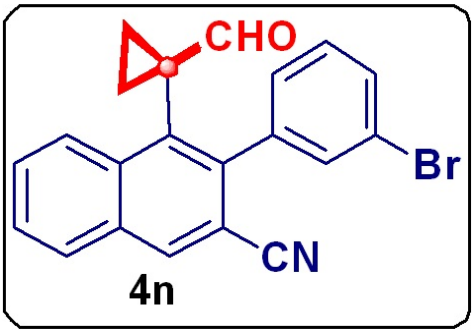

Solvent  $\text{CDCl}_3$   
Spectrometer Frequency 400

8.994  
8.937  
8.397  
8.368  
8.121  
8.100  
8.017  
7.995  
7.972  
7.953  
7.936  
7.917  
7.891  
7.870  
7.739  
7.722  
7.700  
7.665  
7.662  
7.645  
7.577  
7.569  
7.561  
7.553  
7.547  
7.542  
7.537  
7.298

1.887  
1.880  
1.874  
1.868  
1.861  
1.566  
1.377  
1.365  
1.355  
1.343  
1.091  
1.077  
1.051  
0.888  
0.884  
0.865  
-0.000

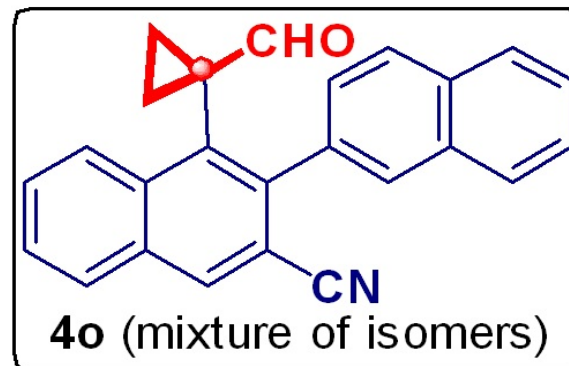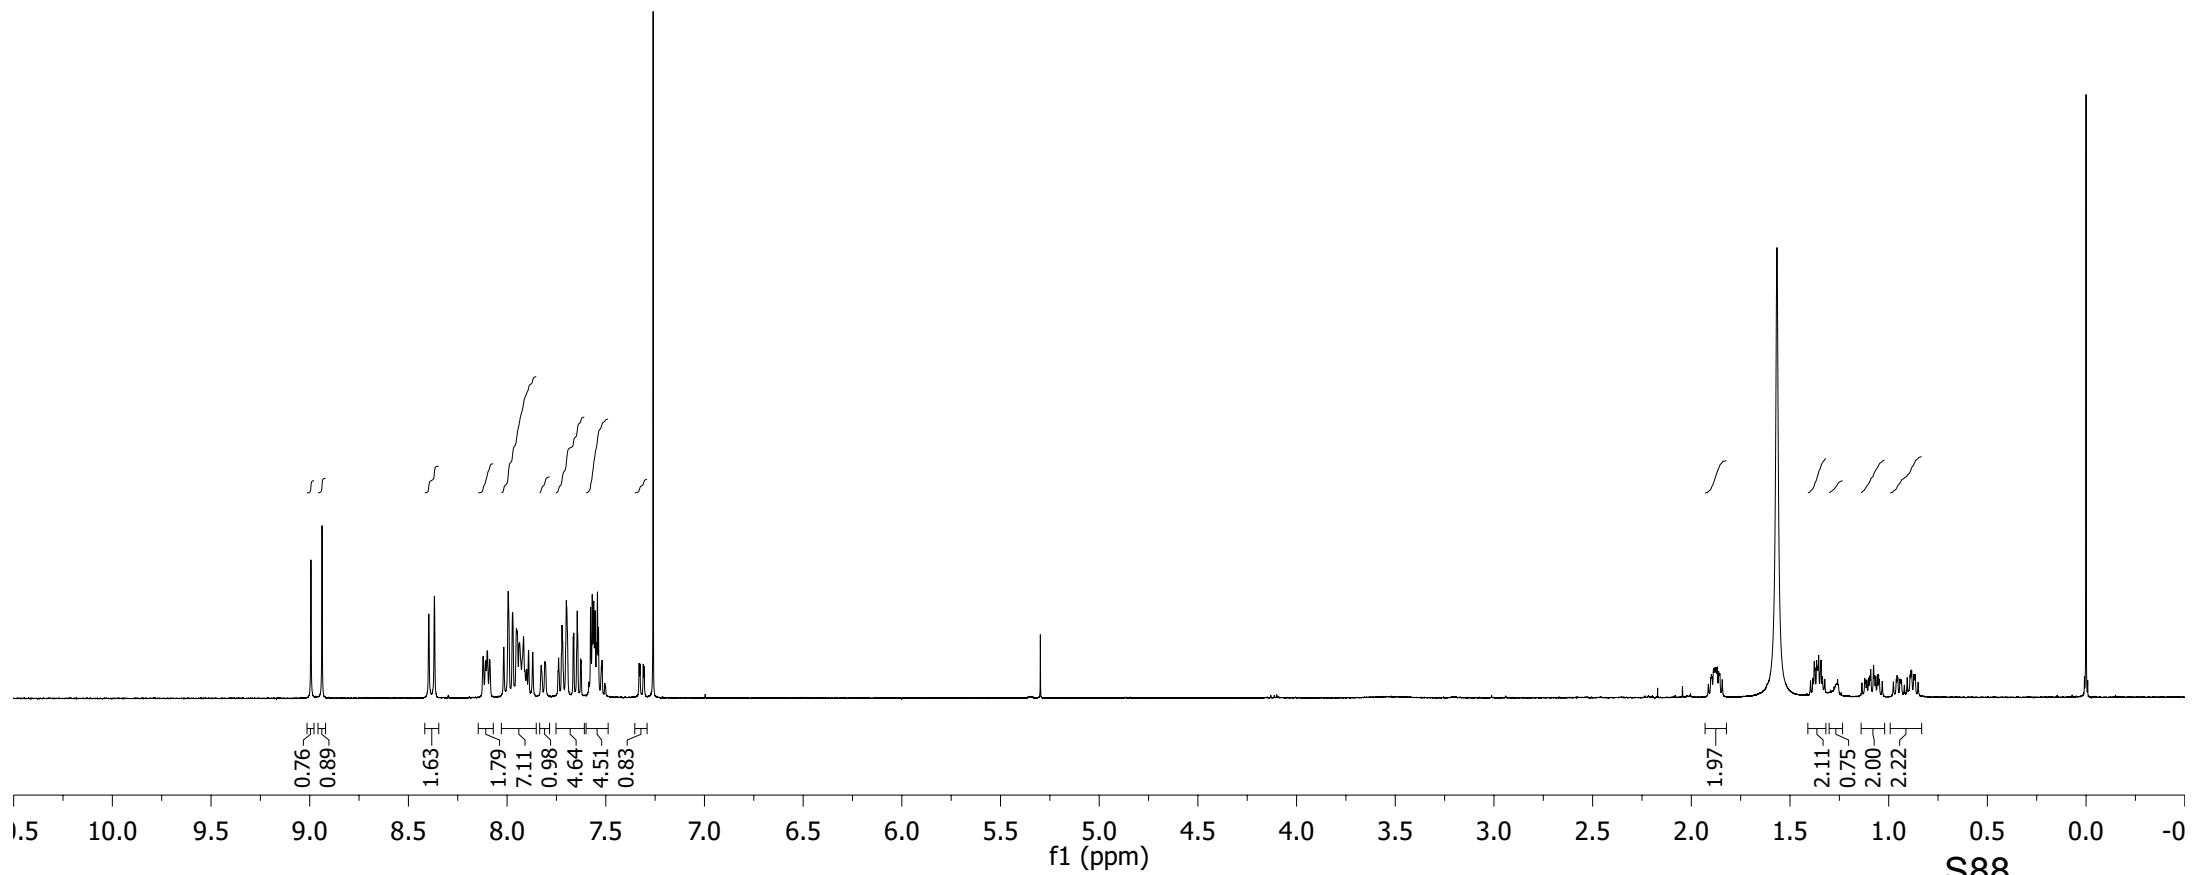



Solvent  $\text{CDCl}_3$   
Spectrometer Frequency 100

200.13  
199.95

141.92  
129.88  
129.27  
128.38  
128.17  
127.35  
118.77  
118.54  
118.34  
111.63

77.32  
77.00  
76.68

34.34

19.43  
19.01  
17.47  
17.24

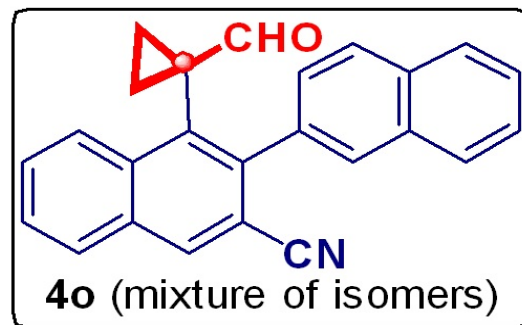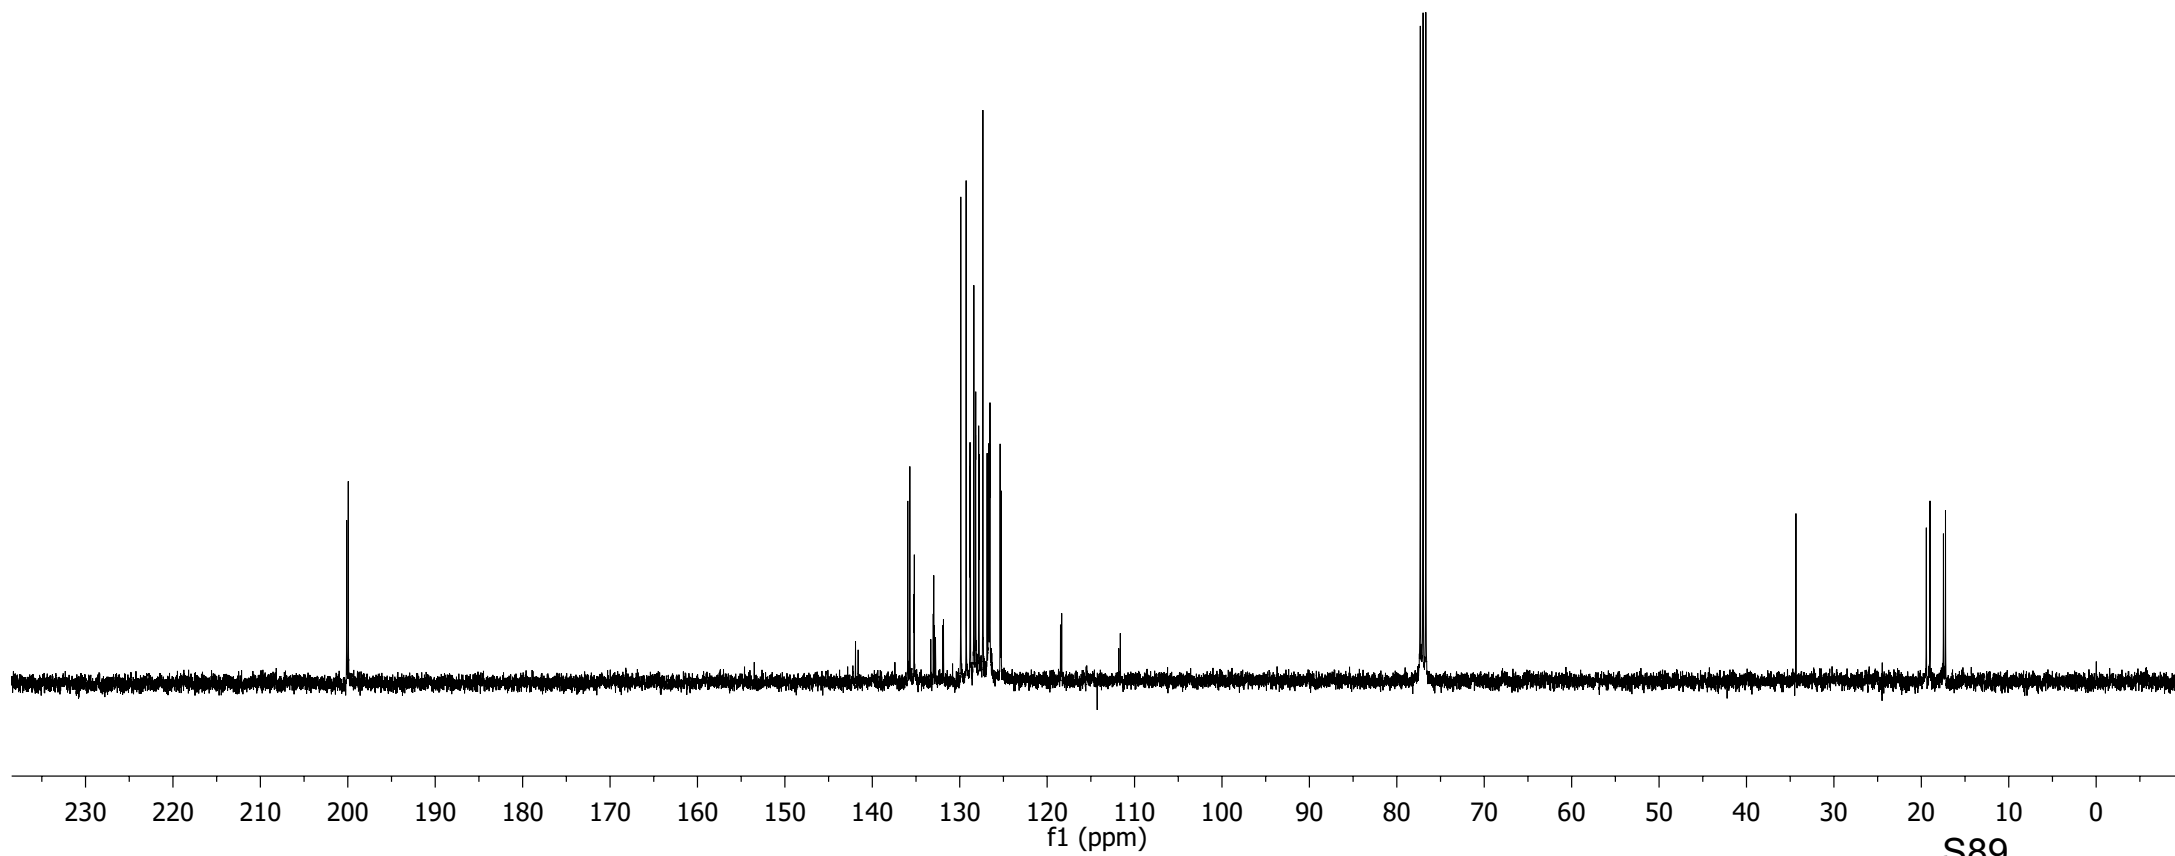

Solvent  $\text{CDCl}_3$   
Spectrometer Frequency 400

8.38  
8.37  
8.31  
7.93  
7.91  
7.90  
7.50  
7.49  
7.39  
7.38  
7.37  
7.36  
7.36  
7.36  
7.36  
7.36  
7.33  
7.32  
7.31  
7.26  
7.24  
7.24  
5.30

1.33  
1.28  
1.25

0.00

8.38  
8.37  
8.31

7.93  
7.92  
7.91  
7.90  
7.50  
7.50  
7.49  
7.48  
7.48  
7.47  
7.44  
7.39  
7.38  
7.38  
7.38  
7.37  
7.37  
7.36  
7.36  
7.36  
7.33  
7.33  
7.32  
7.31  
7.26  
7.24  
7.24  
7.23

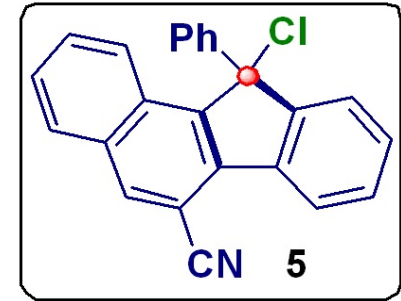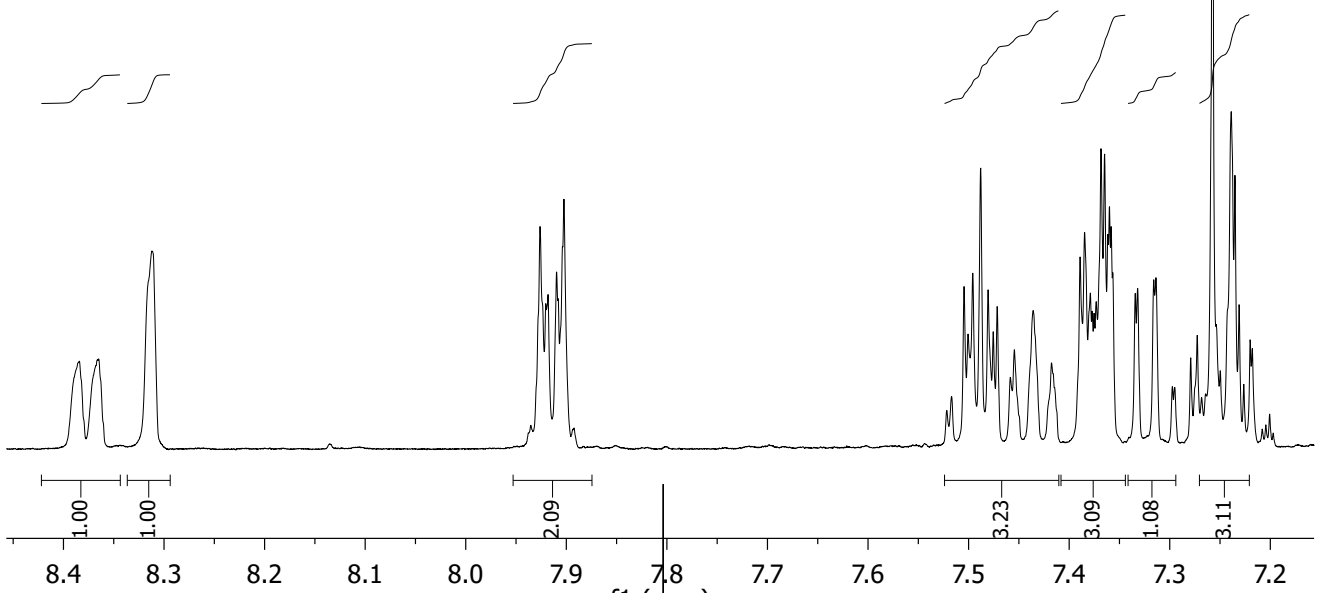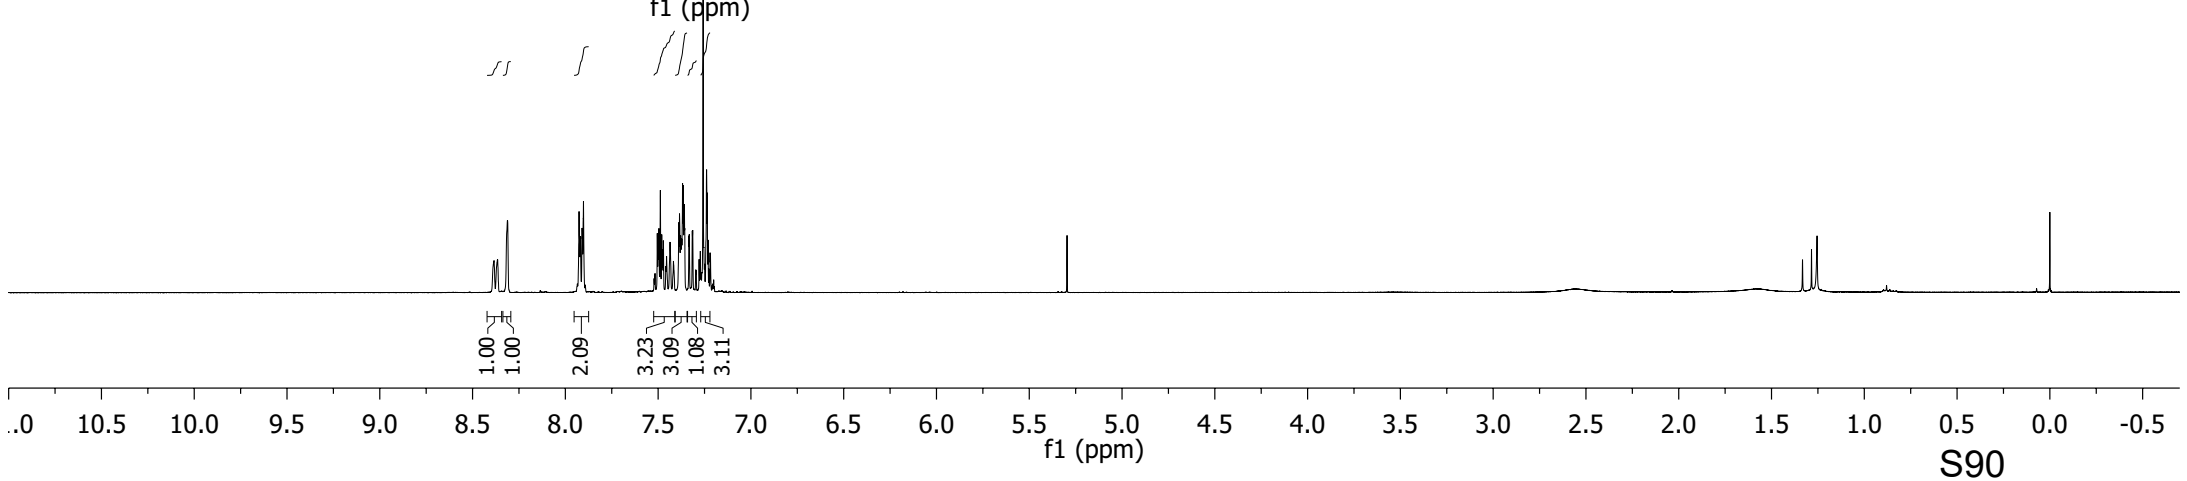

Solvent  $\text{CDCl}_3$   
Spectrometer Frequency 100

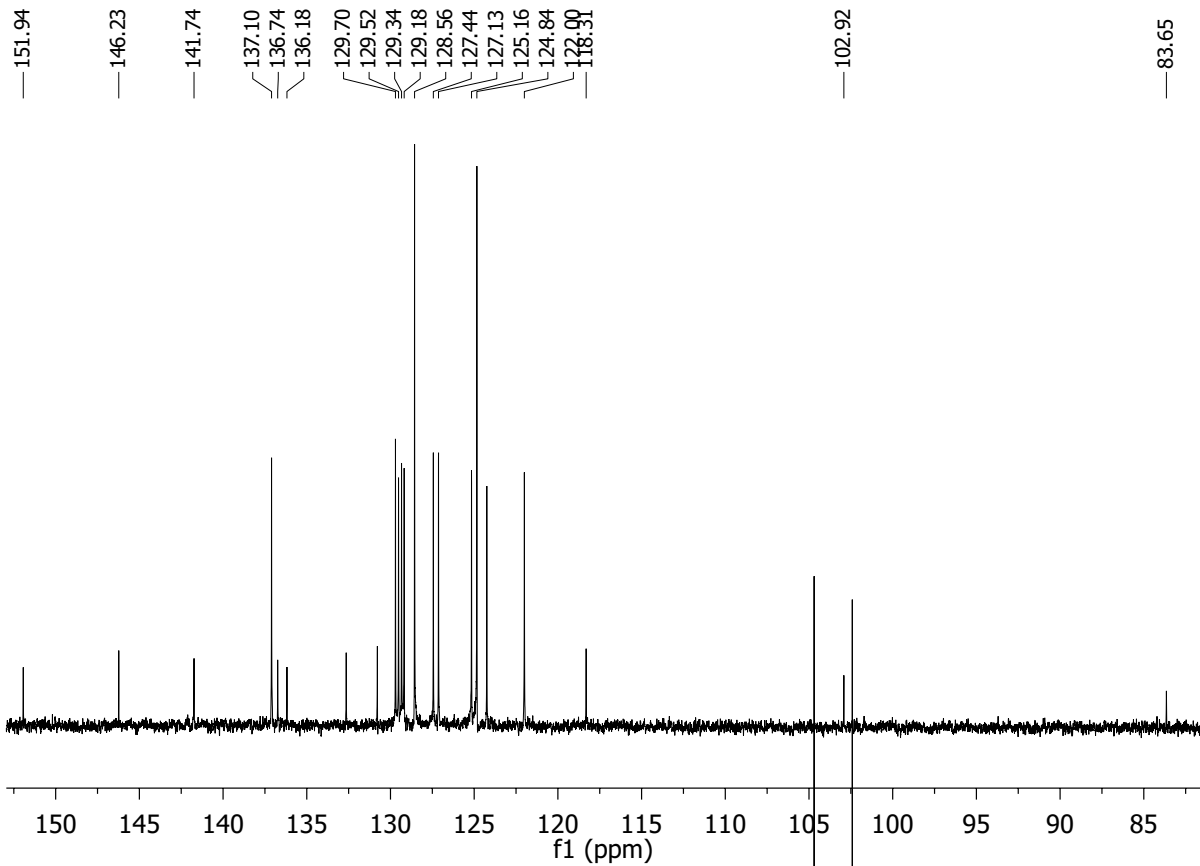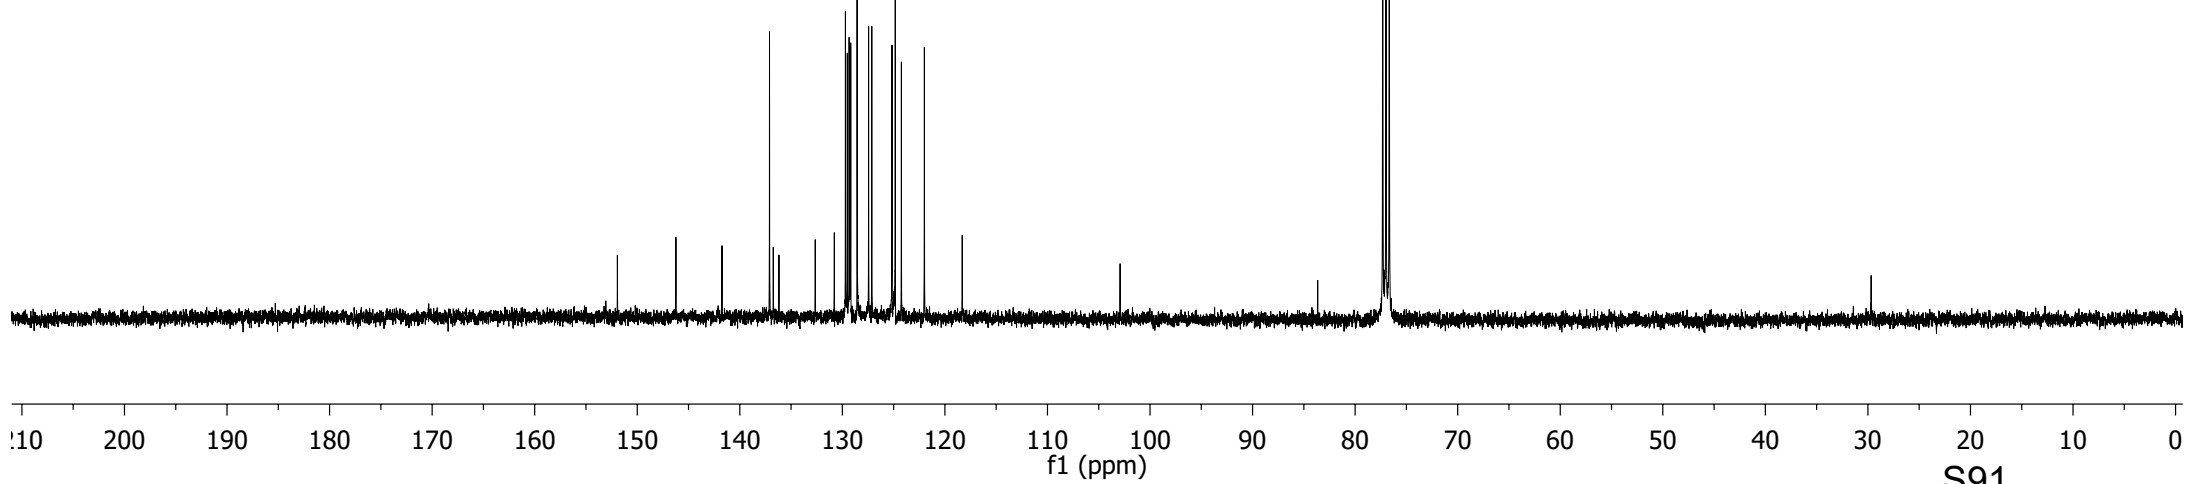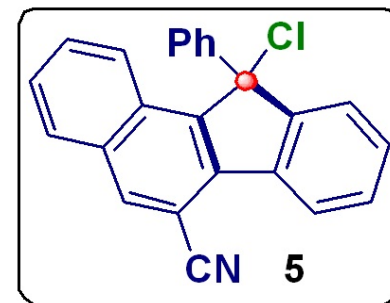

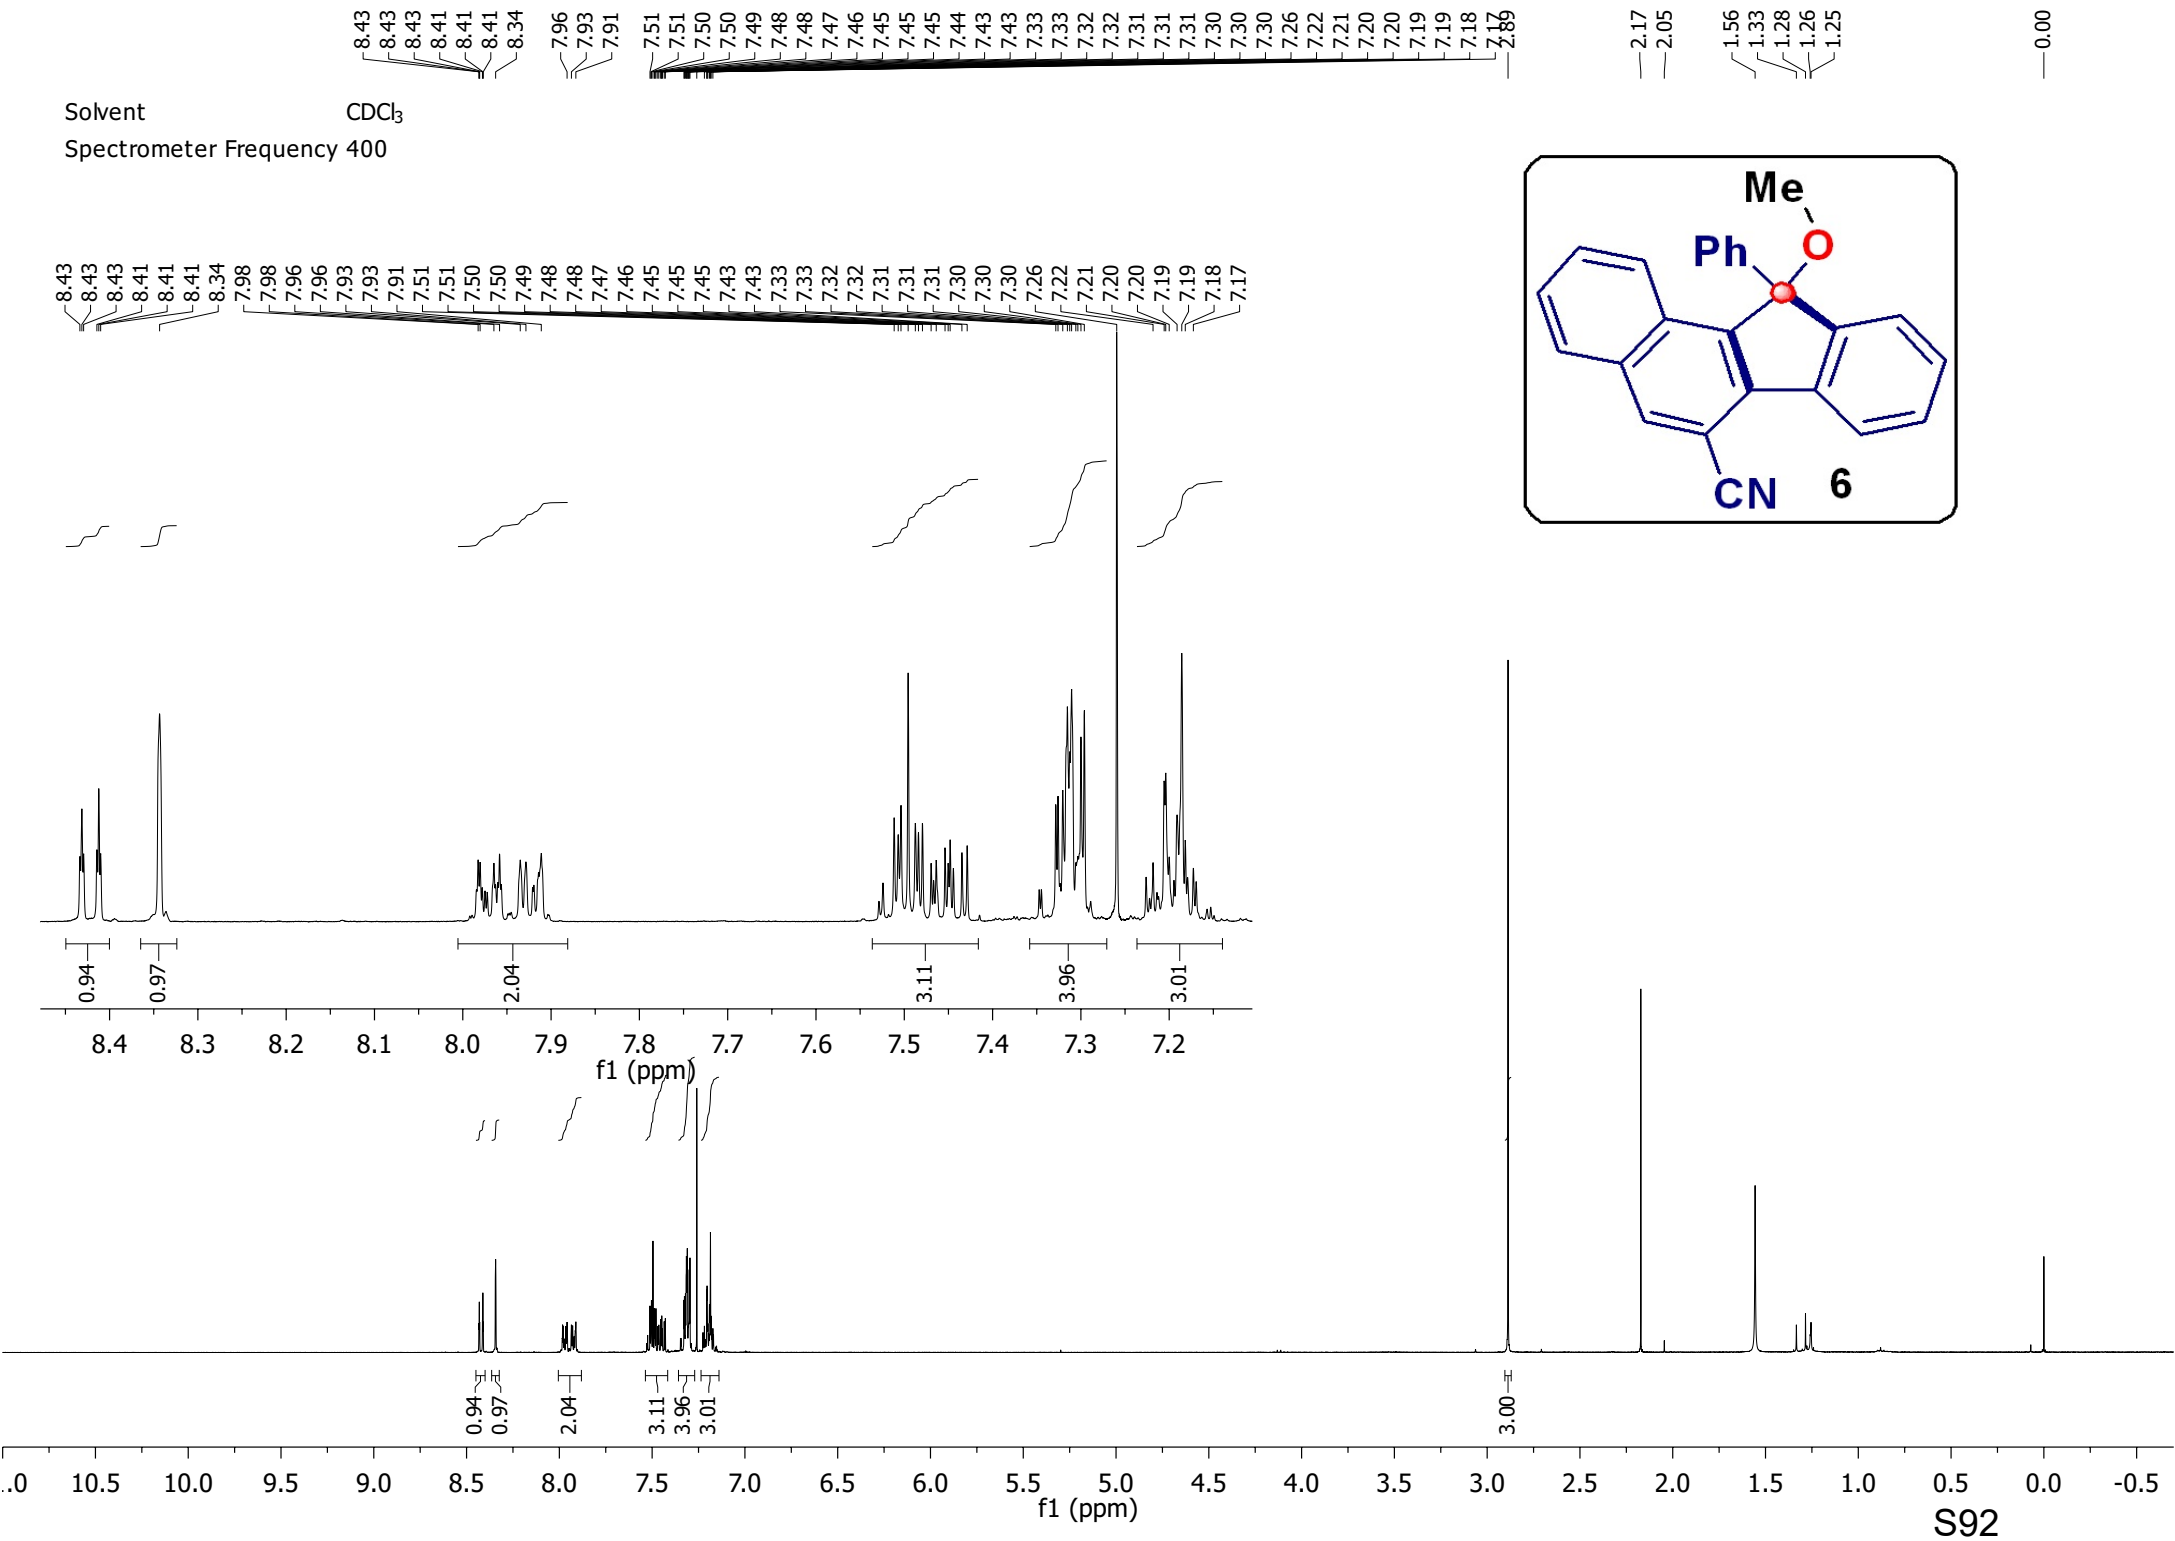

Solvent  $\text{CDCl}_3$   
Spectrometer Frequency 100

148.62  
143.26  
142.09  
137.63  
137.14  
132.17  
131.25  
129.81  
129.35  
129.08  
128.36  
127.28  
127.18  
125.07  
124.79  
124.65  
121.83  
118.41  
102.96  
89.28  
77.31  
76.99  
76.67  
51.47

148.62  
143.26  
142.09  
137.95  
137.63  
137.14  
132.17  
131.25  
129.81  
129.35  
129.08  
128.36  
127.28  
127.18  
125.07  
124.79  
124.65  
121.83  
118.41

150 148 146 144 142 140 138 136 134 132 130 128 126 124 122 120 118  
f1 (ppm)

210 200 190 180 170 160 150 140 130 120 110 100 90 80 70 60 50 40 30 20 10 0  
f1 (ppm)

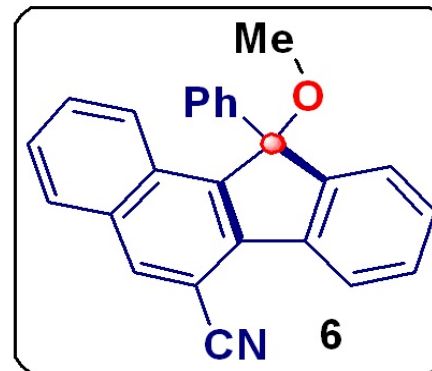

8.67 8.65 8.23 7.92 7.91 7.90 7.90 7.72 7.72 7.71 7.71 7.71 7.70 7.69 7.62 7.62 7.61 7.61 7.60 7.59 7.59 7.51 7.50 7.49 7.49 7.49 7.48 7.47 7.47 7.46 7.46 7.46 7.45 7.44 7.44 7.44 7.43 7.43 7.42 7.42 7.42 7.35 7.34 7.26 3.93 3.91 3.76 3.74 3.74 2.16 2.04 1.57 1.47 1.26 1.25 1.25 1.24 1.24 1.24 1.23 1.23 1.22 0.84 0.83 0.82 0.82 0.81 0.81 0.53 0.52 0.51 0.51 0.50 0.49 0.48 0.47 0.46 0.46 0.45 0.44 -0.00

Solvent CDCl<sub>3</sub>  
Spectrometer Frequency 597

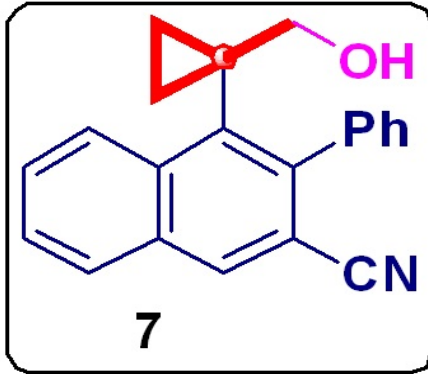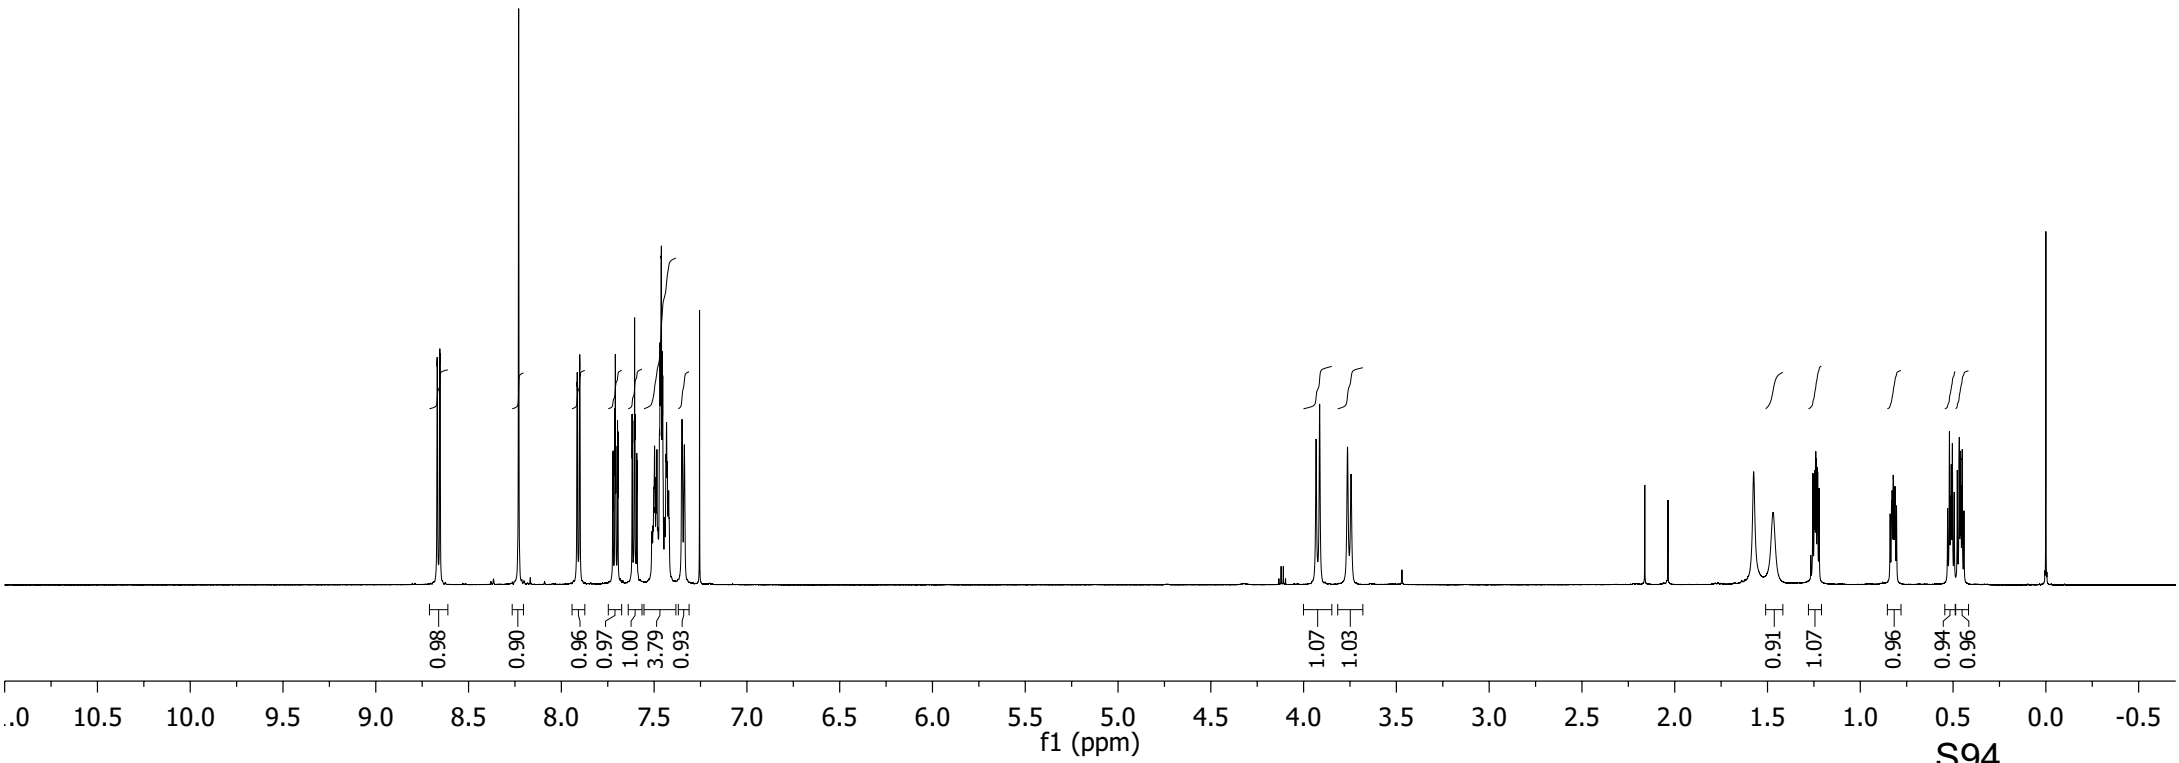

Solvent  $\text{CDCl}_3$   
Spectrometer Frequency 150

141.64  
138.61  
137.62  
135.36  
134.42  
132.11  
129.91  
129.47  
129.07  
129.04  
128.16  
128.10  
128.02  
127.04  
126.46  
118.38  
112.30

77.20  
76.99  
76.78  
70.26

23.41

14.04  
12.82

141.64  
138.61  
137.62  
135.36  
134.42  
132.11  
129.91  
129.47  
129.07  
129.04  
128.16  
128.10  
128.02  
127.04  
126.46

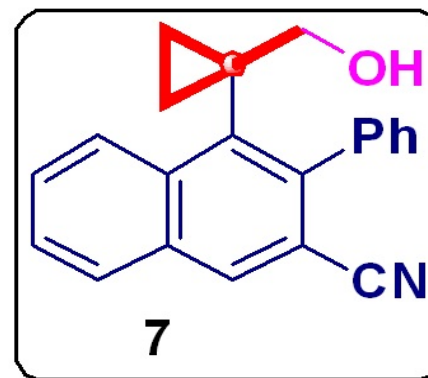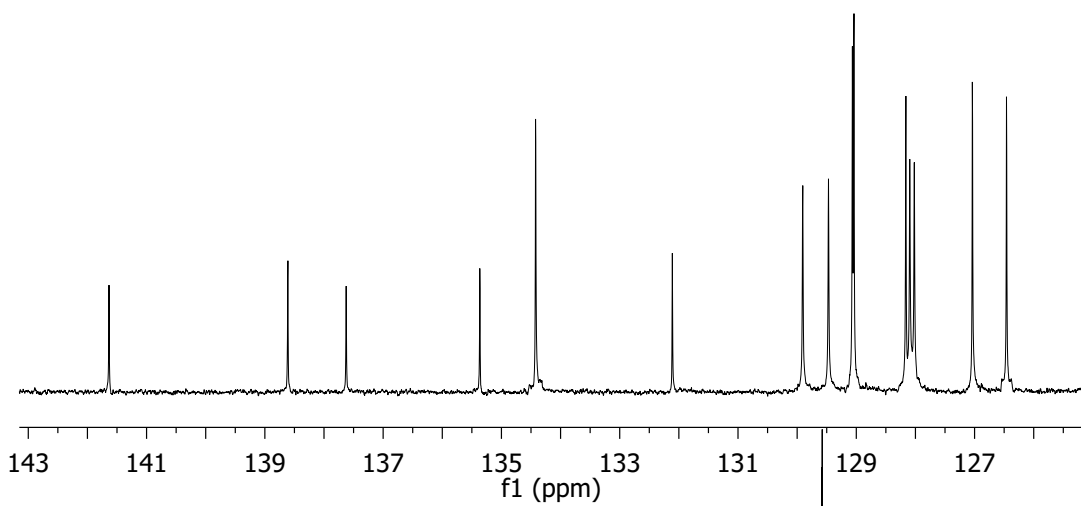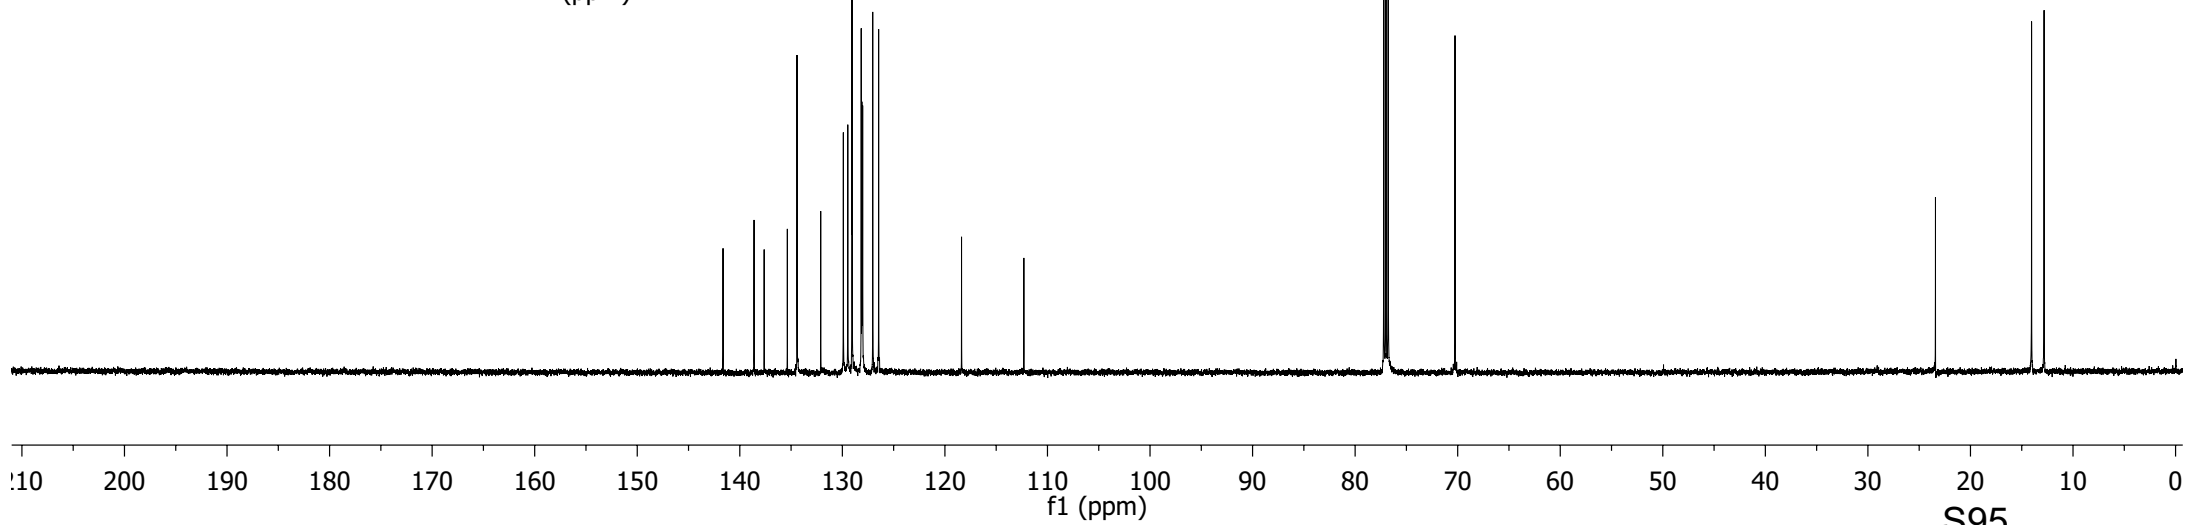

9.47  
9.46  
9.45  
8.89  
8.86  
8.40  
8.00  
7.96  
7.69  
7.68  
7.67  
7.66  
7.65

6.16  
6.10

3.81  
3.79  
3.76  
3.54  
3.52  
3.51  
3.50  
3.20  
3.19  
3.18  
3.16

2.17

1.59

1.25

0.00

Solvent CDCl<sub>3</sub>  
Spectrometer Frequency 400

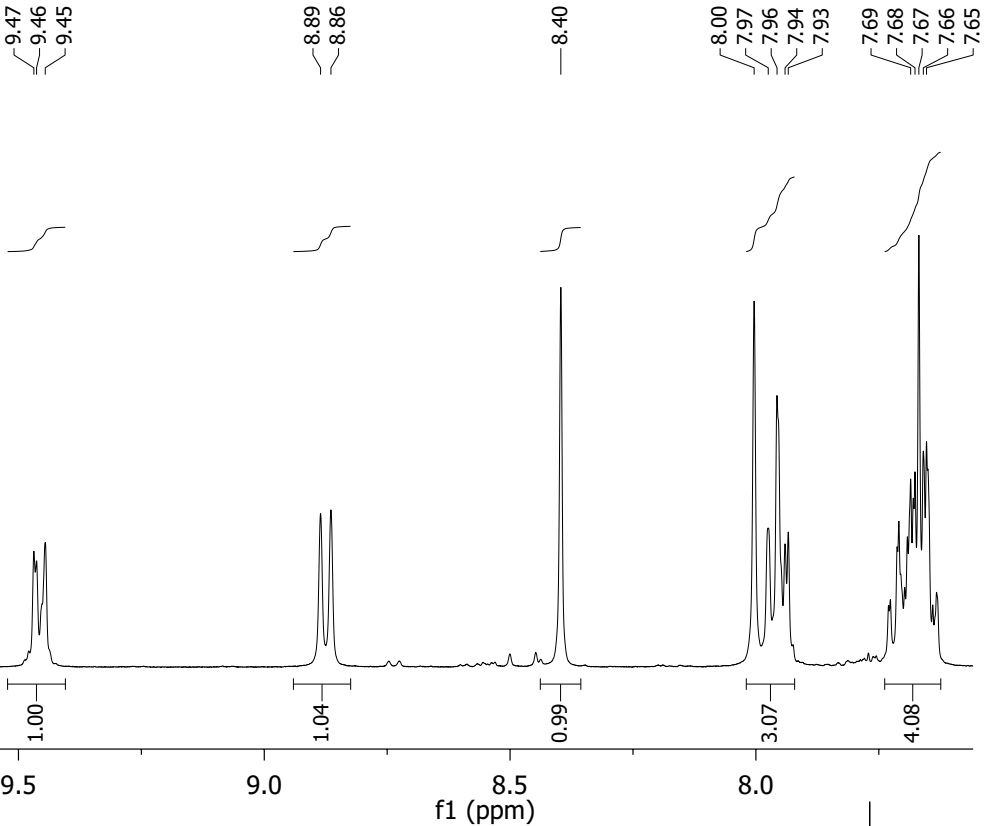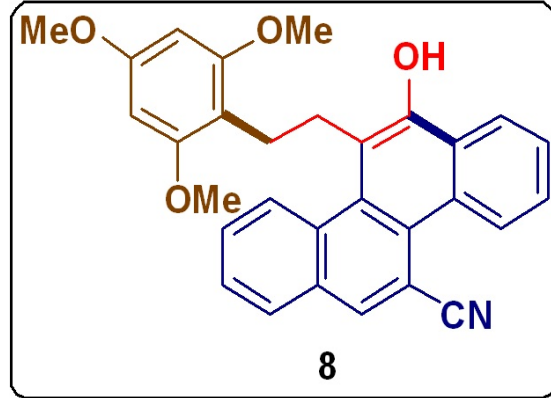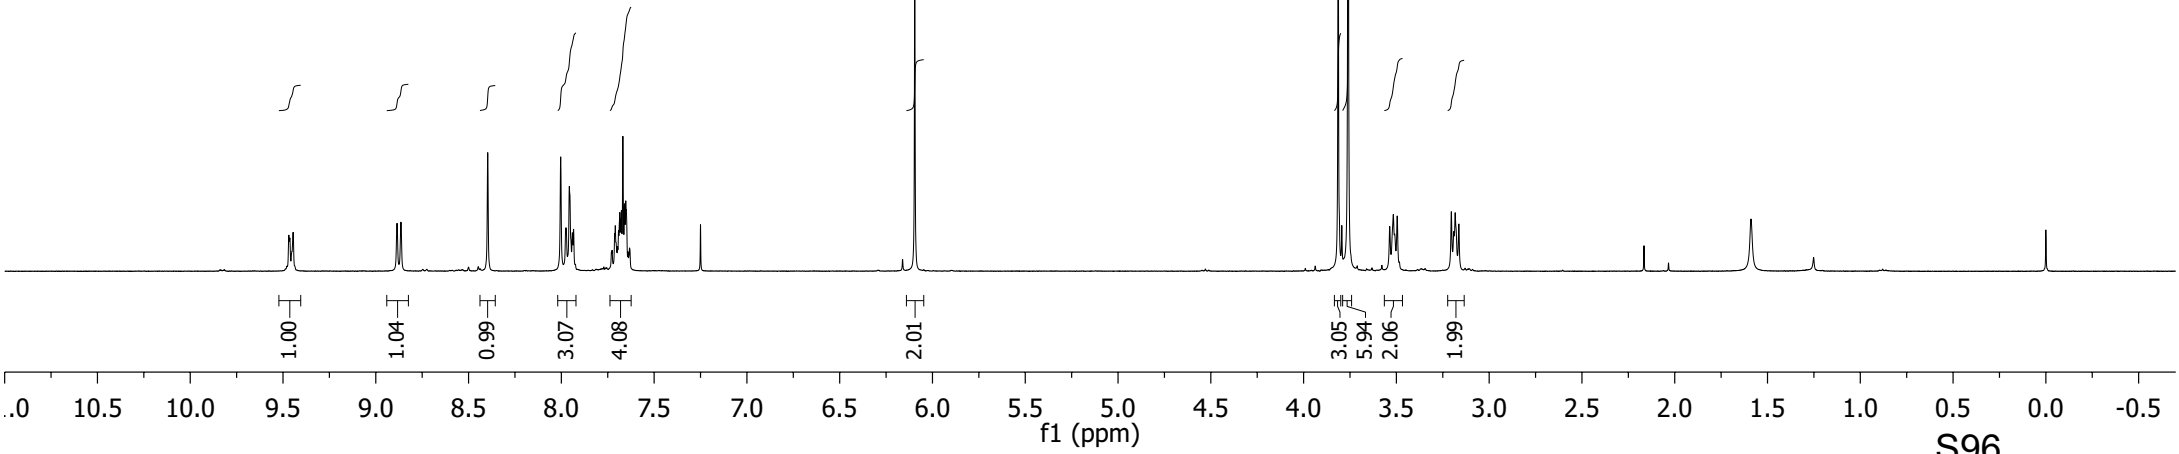



Solvent  $\text{CDCl}_3$   
Spectrometer Frequency 100

159.49  
158.72  
138.03  
137.47  
131.29  
128.54  
128.25  
128.02  
127.51  
127.22  
126.74  
126.01  
125.84  
125.84  
106.53

90.30  
77.32  
77.00  
76.68  
55.62  
55.32  
36.59  
25.40

159.49  
158.72

138.03  
137.47  
132.17  
131.29  
130.51  
128.54  
128.25  
128.02  
127.51  
127.22  
126.74  
126.01  
125.84  
125.84

110.03  
106.53

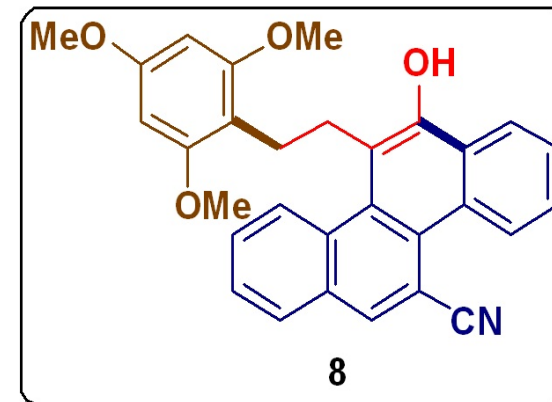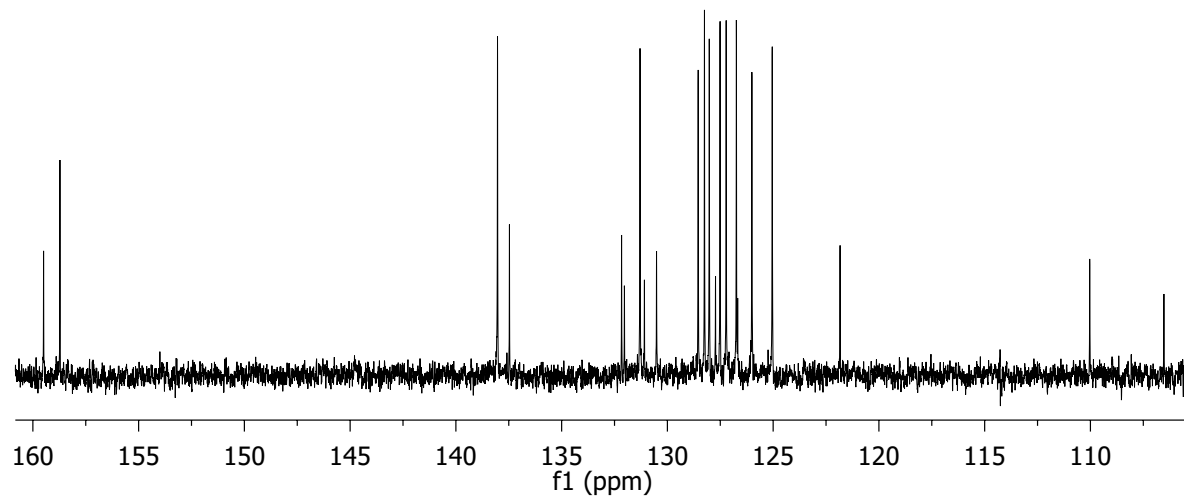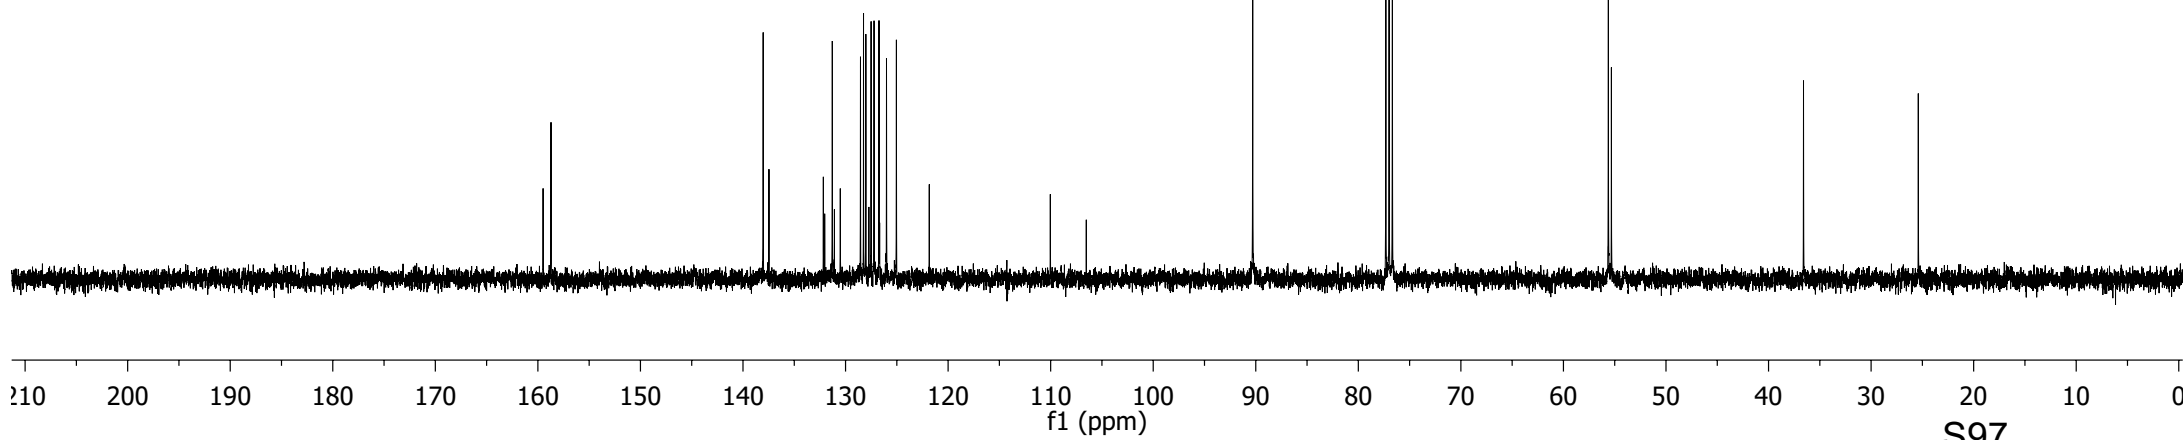

Solvent  $\text{CDCl}_3$   
Spectrometer Frequency 400

8.311  
8.260  
8.238  
7.941  
7.921  
7.728  
7.725  
7.711  
7.707  
7.703  
7.690  
7.686  
7.631  
7.629  
7.611  
7.594  
7.591  
7.545  
7.531  
7.510  
7.471  
7.468  
7.452  
7.439  
7.407  
7.323  
7.306  
7.257

8.311  
8.260  
8.238

7.941  
7.921  
7.728  
7.725  
7.711  
7.707  
7.703  
7.690  
7.686  
7.631  
7.629  
7.611  
7.594  
7.591  
7.510  
7.471  
7.468  
7.452  
7.439  
7.407  
7.306  
7.257

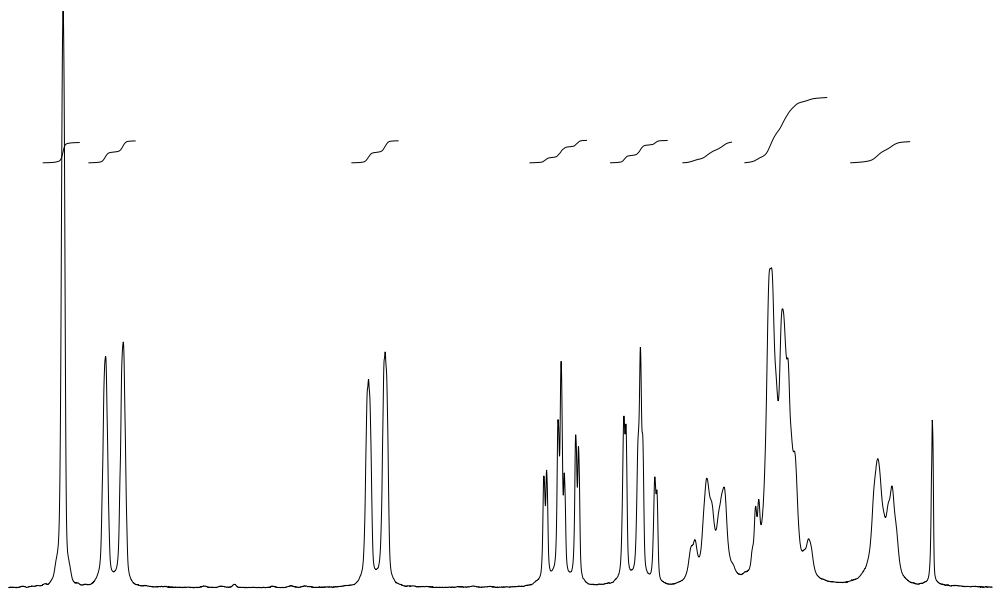

0.88  
0.95  
0.96  
0.97  
0.97  
0.90  
2.83  
0.92  
f1 (ppm)

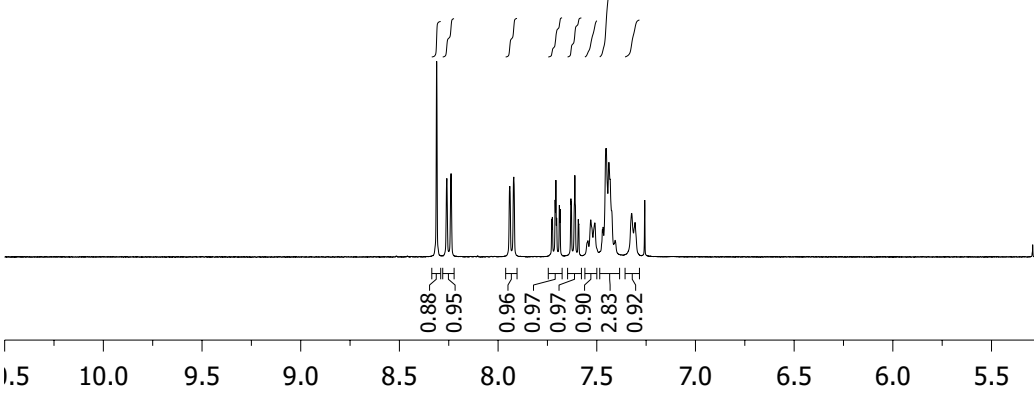

1.5 10.0 9.5 9.0 8.5 8.0 7.5 7.0 6.5 6.0 5.5 5.0 4.5 4.0 3.5 3.0 2.5 2.0 1.5 1.0 0.5 0.0 -0.1  
f1 (ppm)

3.671

1.961  
1.952  
1.943  
1.937  
1.933  
1.927  
1.918  
1.909  
1.586  
1.243  
1.231  
1.083  
1.073  
0.716  
0.704  
0.697  
0.692  
0.685  
0.680

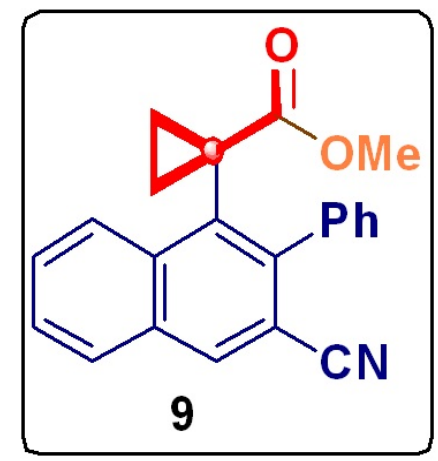

S98

Solvent  $\text{CDCl}_3$   
Spectrometer Frequency 100

140.809 138.102 135.408 134.821 131.796 129.577 129.530 129.036 128.491 128.373 127.037 125.620 118.559 111.581 125.620

140.809 138.102 135.408 134.821 131.796 129.577 129.530 129.036 128.491 128.373 127.037 125.620 118.559

77.309 76.992 76.674

52.548

25.379 22.322 20.393

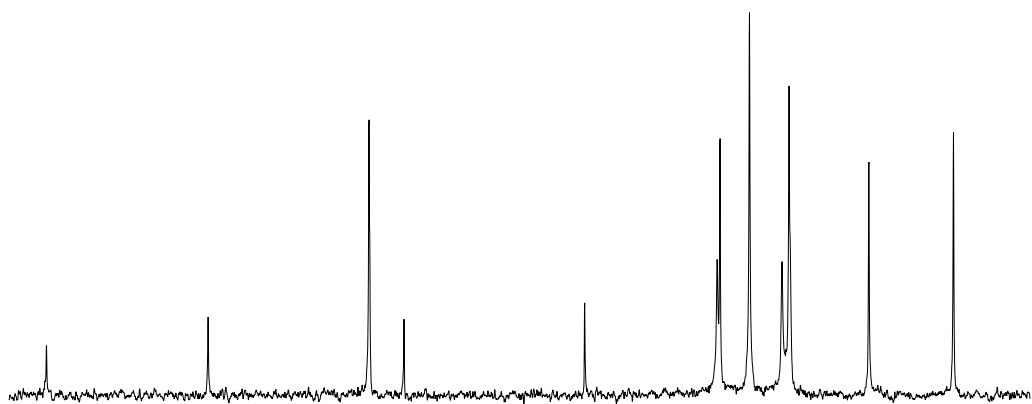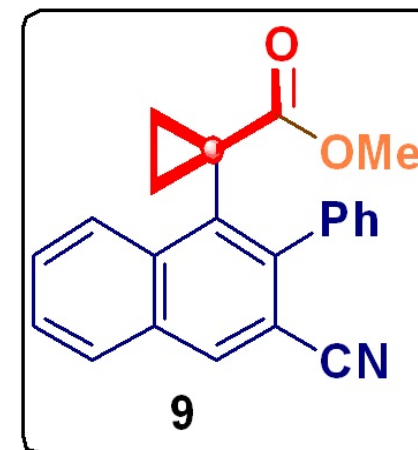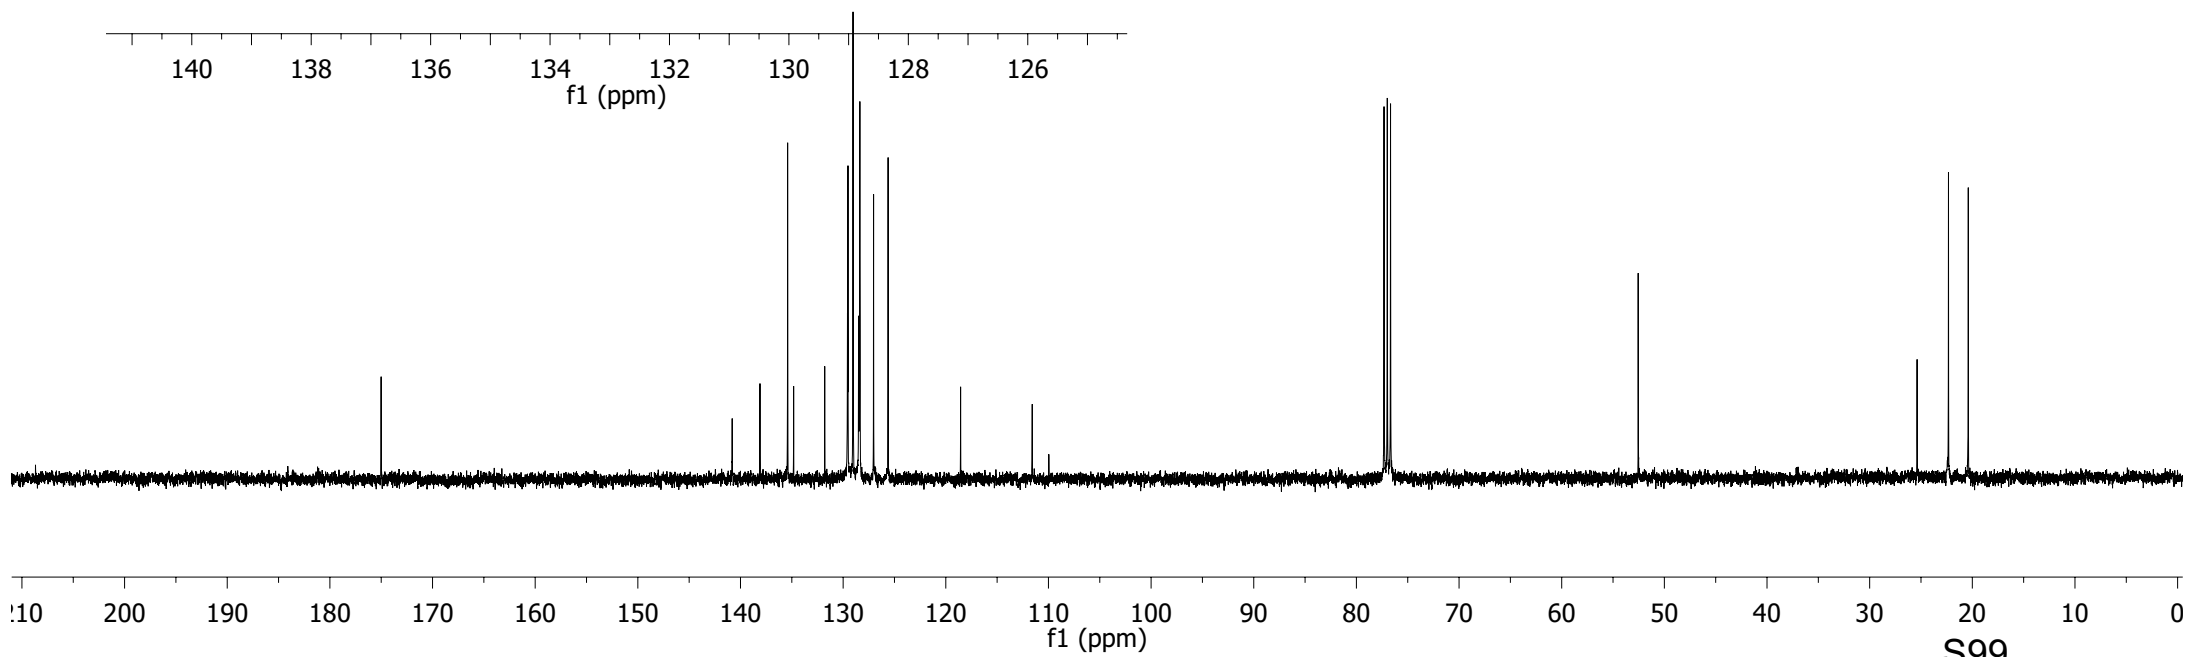

## checkCIF/PLATON report

Structure factors have been supplied for datablock(s) eggpr2104

THIS REPORT IS FOR GUIDANCE ONLY. IF USED AS PART OF A REVIEW PROCEDURE FOR PUBLICATION, IT SHOULD NOT REPLACE THE EXPERTISE OF AN EXPERIENCED CRYSTALLOGRAPHIC REFEREE.

No syntax errors found.      CIF dictionary      Interpreting this report

### Datablock: eggpr2104

---

Bond precision:    C-C = 0.0028 Å                      Wavelength=0.71073

Cell:                      a=12.2536(11)              b=7.8538(6)              c=17.2655(15)  
                                    alpha=90                      beta=92.428(4)              gamma=90

Temperature:              150 K

|                        | Calculated   | Reported     |
|------------------------|--------------|--------------|
| Volume                 | 1660.1(2)    | 1660.1(2)    |
| Space group            | P 21/c       | P 21/c       |
| Hall group             | -P 2ybc      | -P 2ybc      |
| Moiety formula         | C24 H15 N O  | C24 H15 N O  |
| Sum formula            | C24 H15 N O  | C24 H15 N O  |
| Mr                     | 333.37       | 333.37       |
| Dx, g cm <sup>-3</sup> | 1.334        | 1.334        |
| Z                      | 4            | 4            |
| Mu (mm <sup>-1</sup> ) | 0.081        | 0.081        |
| F000                   | 696.0        | 696.0        |
| F000'                  | 696.28       |              |
| h, k, lmax             | 15, 9, 21    | 15, 9, 21    |
| Nref                   | 3425         | 3399         |
| Tmin, Tmax             | 0.982, 0.995 | 0.789, 0.928 |
| Tmin'                  | 0.977        |              |

Correction method= # Reported T Limits: Tmin=0.789 Tmax=0.928  
AbsCorr = MULTI-SCAN

Data completeness= 0.992                      Theta(max)= 26.453

R(reflections)= 0.0517( 2495)

wR2(reflections)=  
0.1668( 3399)

S = 1.048

Npar= 239

---

The following ALERTS were generated. Each ALERT has the format  
**test-name\_ALERT\_alert-type\_alert-level.**

Click on the hyperlinks for more details of the test.

---

● **Alert level C**

|                   |                                                  |        |        |
|-------------------|--------------------------------------------------|--------|--------|
| PLAT905_ALERT_3_C | Negative K value in the Analysis of Variance ... | -0.336 | Report |
| PLAT910_ALERT_3_C | Missing # of FCF Reflection(s) Below Theta(Min). | 5      | Note   |
| PLAT911_ALERT_3_C | Missing FCF Refl Between Thmin & STh/L= 0.600    | 12     | Report |
| PLAT913_ALERT_3_C | Missing # of Very Strong Reflections in FCF .... | 10     | Note   |

---

● **Alert level G**

|                   |                                                  |        |        |
|-------------------|--------------------------------------------------|--------|--------|
| PLAT720_ALERT_4_G | Number of Unusual/Non-Standard Labels .....      | 1      | Note   |
| PLAT793_ALERT_4_G | Model has Chirality at C17 (Centro SPGR)         | S      | Verify |
| PLAT883_ALERT_1_G | No Info/Value for _atom_sites_solution_primary . | Please | Do !   |
| PLAT898_ALERT_4_G | Second Reported H-M Symbol in CIF Ignored .....  | !      | Check  |
| PLAT912_ALERT_4_G | Missing # of FCF Reflections Above STh/L= 0.600  | 9      | Note   |
| PLAT933_ALERT_2_G | Number of HKL-OMIT Records in Embedded .res File | 3      | Note   |
| PLAT965_ALERT_2_G | The SHELXL WEIGHT Optimisation has not Converged | Please | Check  |
| PLAT978_ALERT_2_G | Number C-C Bonds with Positive Residual Density. | 6      | Info   |

---

- 0 **ALERT level A** = Most likely a serious problem - resolve or explain  
0 **ALERT level B** = A potentially serious problem, consider carefully  
4 **ALERT level C** = Check. Ensure it is not caused by an omission or oversight  
8 **ALERT level G** = General information/check it is not something unexpected
- 1 ALERT type 1 CIF construction/syntax error, inconsistent or missing data  
3 ALERT type 2 Indicator that the structure model may be wrong or deficient  
4 ALERT type 3 Indicator that the structure quality may be low  
4 ALERT type 4 Improvement, methodology, query or suggestion  
0 ALERT type 5 Informative message, check
-

It is advisable to attempt to resolve as many as possible of the alerts in all categories. Often the minor alerts point to easily fixed oversights, errors and omissions in your CIF or refinement strategy, so attention to these fine details can be worthwhile. In order to resolve some of the more serious problems it may be necessary to carry out additional measurements or structure refinements. However, the purpose of your study may justify the reported deviations and the more serious of these should normally be commented upon in the discussion or experimental section of a paper or in the "special\_details" fields of the CIF. checkCIF was carefully designed to identify outliers and unusual parameters, but every test has its limitations and alerts that are not important in a particular case may appear. Conversely, the absence of alerts does not guarantee there are no aspects of the results needing attention. It is up to the individual to critically assess their own results and, if necessary, seek expert advice.

### **Publication of your CIF in IUCr journals**

A basic structural check has been run on your CIF. These basic checks will be run on all CIFs submitted for publication in IUCr journals (*Acta Crystallographica*, *Journal of Applied Crystallography*, *Journal of Synchrotron Radiation*); however, if you intend to submit to *Acta Crystallographica Section C* or *E* or *IUCrData*, you should make sure that full publication checks are run on the final version of your CIF prior to submission.

### **Publication of your CIF in other journals**

Please refer to the *Notes for Authors* of the relevant journal for any special instructions relating to CIF submission.

---

**PLATON version of 28/11/2022; check.def file version of 28/11/2022**

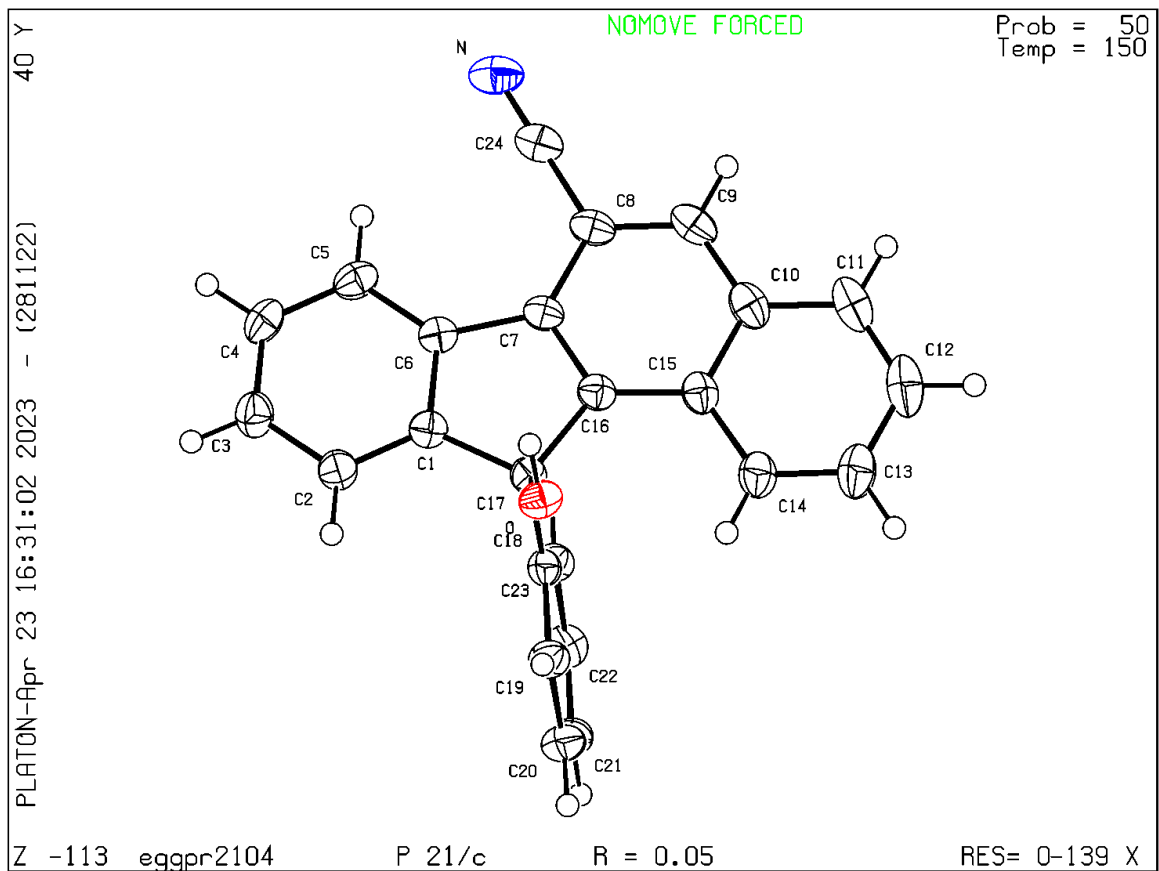

## checkCIF/PLATON report

You have not supplied any structure factors. As a result the full set of tests cannot be run.

THIS REPORT IS FOR GUIDANCE ONLY. IF USED AS PART OF A REVIEW PROCEDURE FOR PUBLICATION, IT SHOULD NOT REPLACE THE EXPERTISE OF AN EXPERIENCED CRYSTALLOGRAPHIC REFEREE.

No syntax errors found.      CIF dictionary      Interpreting this report

### Datablock: I

---

Bond precision:      C-C = 0.0018 A      Wavelength=0.71073

Cell:                      a=8.7518(2)                      b=9.3697(2)                      c=10.0504(2)  
                                alpha=107.912(2)                      beta=94.173(2)                      gamma=100.409(2)

Temperature:              113 K

|                        | Calculated   | Reported     |
|------------------------|--------------|--------------|
| Volume                 | 764.01(3)    | 764.01(3)    |
| Space group            | P -1         | P -1         |
| Hall group             | -P 1         | -P 1         |
| Moiety formula         | C21 H15 N O  | C21 H15 N O  |
| Sum formula            | C21 H15 N O  | C21 H15 N O  |
| Mr                     | 297.34       | 297.34       |
| Dx, g cm <sup>-3</sup> | 1.293        | 1.293        |
| Z                      | 2            | 2            |
| Mu (mm <sup>-1</sup> ) | 0.079        | 0.079        |
| F000                   | 312.0        | 312.0        |
| F000'                  | 312.12       |              |
| h, k, lmax             | 10, 11, 11   | 10, 11, 11   |
| Nref                   | 2685         | 2683         |
| Tmin, Tmax             | 0.984, 0.984 | 0.406, 1.000 |
| Tmin'                  | 0.984        |              |

Correction method= # Reported T Limits: Tmin=0.406 Tmax=1.000  
AbsCorr = MULTI-SCAN

Data completeness= 0.999                      Theta(max)= 25.000

R(reflections)= 0.0344( 2484)

wR2(reflections)=  
0.0945( 2683)

S = 1.064

Npar= 208



---

The following ALERTS were generated. Each ALERT has the format

**test-name\_ALERT\_alert-type\_alert-level.**

Click on the hyperlinks for more details of the test.

---

 **Alert level G**

|                   |                                                  |       |             |
|-------------------|--------------------------------------------------|-------|-------------|
| PLAT003_ALERT_2_G | Number of Uiso or Uij Restrained non-H Atoms ... | 23    | Report      |
| PLAT005_ALERT_5_G | No Embedded Refinement Details Found in the CIF  |       | Please Do ! |
| PLAT154_ALERT_1_G | The s.u.'s on the Cell Angles are Equal ..(Note) | 0.002 | Degree      |
| PLAT230_ALERT_2_G | Hirshfeld Test Diff for C13 --C14 .              | 5.8   | s.u.        |
| PLAT860_ALERT_3_G | Number of Least-Squares Restraints .....         | 684   | Note        |

---

0 **ALERT level A** = Most likely a serious problem - resolve or explain  
0 **ALERT level B** = A potentially serious problem, consider carefully  
0 **ALERT level C** = Check. Ensure it is not caused by an omission or oversight  
5 **ALERT level G** = General information/check it is not something unexpected

1 ALERT type 1 CIF construction/syntax error, inconsistent or missing data  
2 ALERT type 2 Indicator that the structure model may be wrong or deficient  
1 ALERT type 3 Indicator that the structure quality may be low  
0 ALERT type 4 Improvement, methodology, query or suggestion  
1 ALERT type 5 Informative message, check

---

## checkCIF publication errors

---

 **Alert level A**

PUBL004\_ALERT\_1\_A The contact author's name and address are missing,  
\_publ\_contact\_author\_name and \_publ\_contact\_author\_address.  
PUBL005\_ALERT\_1\_A \_publ\_contact\_author\_email, \_publ\_contact\_author\_fax and  
\_publ\_contact\_author\_phone are all missing.  
At least one of these should be present.  
PUBL006\_ALERT\_1\_A \_publ\_requested\_journal is missing  
e.g. 'Acta Crystallographica Section C'  
PUBL008\_ALERT\_1\_A \_publ\_section\_title is missing. Title of paper.  
PUBL009\_ALERT\_1\_A \_publ\_author\_name is missing. List of author(s) name(s).  
PUBL010\_ALERT\_1\_A \_publ\_author\_address is missing. Author(s) address(es).  
PUBL012\_ALERT\_1\_A \_publ\_section\_abstract is missing.  
Abstract of paper in English.

---

7 **ALERT level A** = Data missing that is essential or data in wrong format  
0 **ALERT level G** = General alerts. Data that may be required is missing

---

## Publication of your CIF

You should attempt to resolve as many as possible of the alerts in all categories. Often the minor alerts point to easily fixed oversights, errors and omissions in your CIF or refinement strategy, so attention to these fine details can be worthwhile. In order to resolve some of the more serious problems it may be necessary to carry out additional measurements or structure refinements. However, the nature of your study may justify the reported deviations from journal submission requirements and the more serious of these should be commented upon in the discussion or experimental section of a paper or in the "special\_details" fields of the CIF. *checkCIF* was carefully designed to identify outliers and unusual parameters, but every test has its limitations and alerts that are not important in a particular case may appear. Conversely, the absence of alerts does not guarantee there are no aspects of the results needing attention. It is up to the individual to critically assess their own results and, if necessary, seek expert advice.

If level A alerts remain, which you believe to be justified deviations, and you intend to submit this CIF for publication in a journal, you should additionally insert an explanation in your CIF using the Validation Reply Form (VRF) below. This will allow your explanation to be considered as part of the review process.

## Validation response form

Please find below a validation response form (VRF) that can be filled in and pasted into your CIF.

```
# start Validation Reply Form
_vrf_PUBL004_GLOBAL
;
PROBLEM: The contact author's name and address are missing,
RESPONSE: ...
;
_vrf_PUBL005_GLOBAL
;
PROBLEM: _publ_contact_author_email, _publ_contact_author_fax and
RESPONSE: ...
;
_vrf_PUBL006_GLOBAL
;
PROBLEM: _publ_requested_journal is missing
RESPONSE: ...
;
_vrf_PUBL008_GLOBAL
;
PROBLEM: _publ_section_title is missing. Title of paper.
RESPONSE: ...
;
_vrf_PUBL009_GLOBAL
;
PROBLEM: _publ_author_name is missing. List of author(s) name(s).
RESPONSE: ...
;
_vrf_PUBL010_GLOBAL
;
PROBLEM: _publ_author_address is missing. Author(s) address(es).
```

```

RESPONSE: ...
;
_vrf_PUBL012_GLOBAL
;
PROBLEM: _publ_section_abstract is missing.
RESPONSE: ...
;
# end Validation Reply Form

```

If you wish to submit your CIF for publication in Acta Crystallographica Section C or E, you should upload your CIF via the web. If you wish to submit your CIF for publication in IUCrData you should upload your CIF via the web. If your CIF is to form part of a submission to another IUCr journal, you will be asked, either during electronic submission or by the Co-editor handling your paper, to upload your CIF via our web site.

---

**PLATON version of 13/07/2021; check.def file version of 13/07/2021**

Datablock I - ellipsoid plot

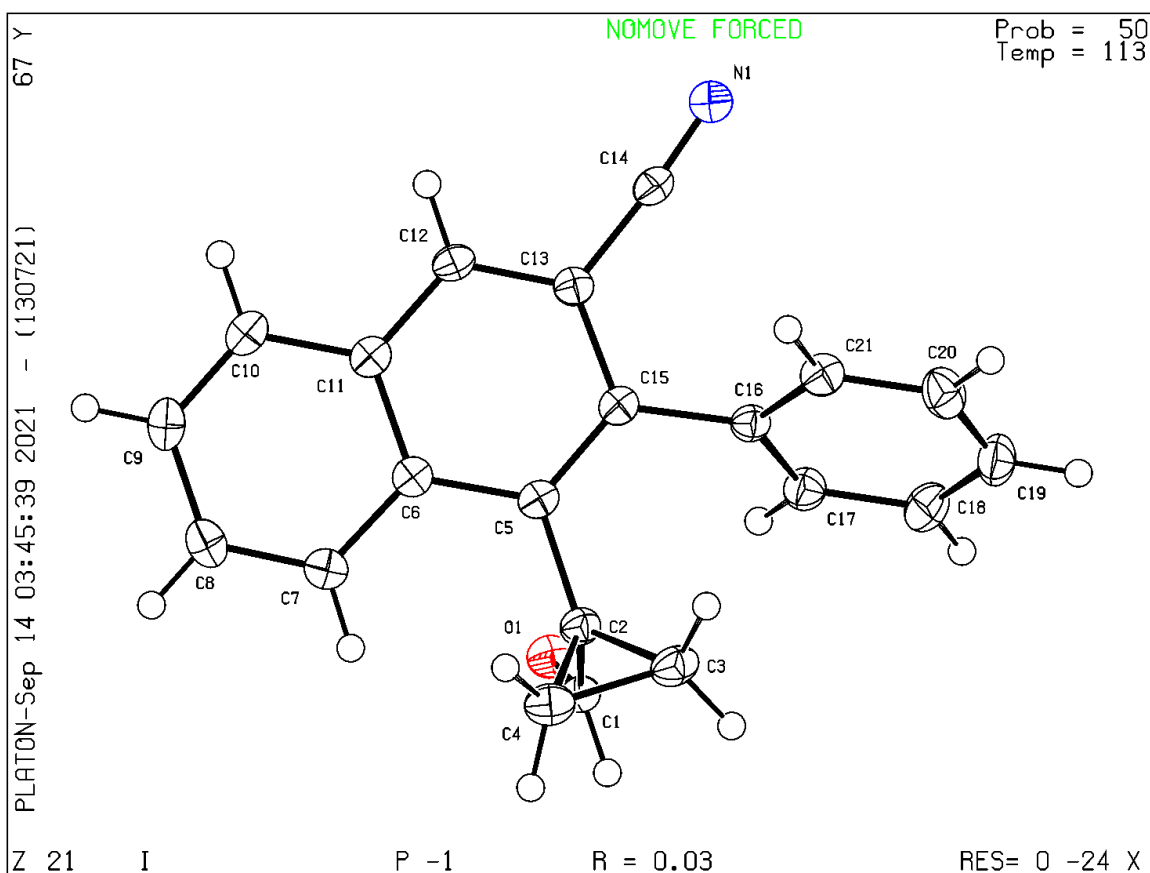

# checkCIF/PLATON report

Structure factors have been supplied for datablock(s) I

THIS REPORT IS FOR GUIDANCE ONLY. IF USED AS PART OF A REVIEW PROCEDURE FOR PUBLICATION, IT SHOULD NOT REPLACE THE EXPERTISE OF AN EXPERIENCED CRYSTALLOGRAPHIC REFEREE.

No syntax errors found.      CIF dictionary      Interpreting this report

## Datablock: I

---

|                 |                |                    |             |
|-----------------|----------------|--------------------|-------------|
| Bond precision: | C-C = 0.0018 A | Wavelength=0.71073 |             |
| Cell:           | a=11.5468(2)   | b=16.9648(2)       | c=8.6098(2) |
|                 | alpha=90       | beta=91.476(1)     | gamma=90    |
| Temperature:    | 113 K          |                    |             |
|                 | Calculated     | Reported           |             |
| Volume          | 1686.01(5)     | 1686.01(5)         |             |
| Space group     | P 21/c         | P 1 21/c 1         |             |
| Hall group      | -P 2ybc        | -P 2ybc            |             |
| Moiety formula  | C24 H14 Cl N   | C24 H14 Cl N       |             |
| Sum formula     | C24 H14 Cl N   | C24 H14 Cl N       |             |
| Mr              | 351.81         | 351.81             |             |
| Dx,g cm-3       | 1.386          | 1.386              |             |
| Z               | 4              | 4                  |             |
| Mu (mm-1)       | 0.233          | 0.233              |             |
| F000            | 728.0          | 728.0              |             |
| F000'           | 728.84         |                    |             |
| h,k,lmax        | 14,21,11       | 14,21,10           |             |
| Nref            | 3711           | 3598               |             |
| Tmin,Tmax       | 0.920,0.954    | 0.349,1.000        |             |
| Tmin'           | 0.920          |                    |             |

Correction method= # Reported T Limits: Tmin=0.349 Tmax=1.000  
AbsCorr = MULTI-SCAN

Data completeness= 0.970      Theta(max)= 27.092  
R(reflections)= 0.0318( 3298)      wR2(reflections)= 0.0851( 3598)

S = 1.055      Npar= 235

---

The following ALERTS were generated. Each ALERT has the format  
**test-name\_ALERT\_alert-type\_alert-level.**  
Click on the hyperlinks for more details of the test.

---

### ● Alert level C

PLAT918\_ALERT\_3\_C Reflection(s) with I(obs) much Smaller I(calc) . 1 Check  
PLAT939\_ALERT\_3\_C Large Value of Not (SHELXL) Weight Optimized S . 20.74 Check

---

### ● Alert level G

PLAT153\_ALERT\_1\_G The s.u.'s on the Cell Axes are Equal ..(Note) 0.0002 Ang.  
PLAT230\_ALERT\_2\_G Hirshfeld Test Diff for C15 --C24 . 6.1 s.u.  
PLAT793\_ALERT\_4\_G Model has Chirality at C1 (Centro SPGR) S Verify  
PLAT912\_ALERT\_4\_G Missing # of FCF Reflections Above STh/L= 0.600 111 Note  
PLAT978\_ALERT\_2\_G Number C-C Bonds with Positive Residual Density. 20 Info

---

0 **ALERT level A** = Most likely a serious problem - resolve or explain  
0 **ALERT level B** = A potentially serious problem, consider carefully  
2 **ALERT level C** = Check. Ensure it is not caused by an omission or oversight  
5 **ALERT level G** = General information/check it is not something unexpected

1 ALERT type 1 CIF construction/syntax error, inconsistent or missing data  
2 ALERT type 2 Indicator that the structure model may be wrong or deficient  
2 ALERT type 3 Indicator that the structure quality may be low  
2 ALERT type 4 Improvement, methodology, query or suggestion  
0 ALERT type 5 Informative message, check

---

## checkCIF publication errors

---

### ● Alert level A

PUBL004\_ALERT\_1\_A The contact author's name and address are missing,  
\_publ\_contact\_author\_name and \_publ\_contact\_author\_address.  
PUBL005\_ALERT\_1\_A \_publ\_contact\_author\_email, \_publ\_contact\_author\_fax and  
\_publ\_contact\_author\_phone are all missing.  
At least one of these should be present.  
PUBL006\_ALERT\_1\_A \_publ\_requested\_journal is missing  
e.g. 'Acta Crystallographica Section C'  
PUBL008\_ALERT\_1\_A \_publ\_section\_title is missing. Title of paper.  
PUBL009\_ALERT\_1\_A \_publ\_author\_name is missing. List of author(s) name(s).  
PUBL010\_ALERT\_1\_A \_publ\_author\_address is missing. Author(s) address(es).  
PUBL012\_ALERT\_1\_A \_publ\_section\_abstract is missing.  
Abstract of paper in English.

---

7 **ALERT level A** = Data missing that is essential or data in wrong format  
0 **ALERT level G** = General alerts. Data that may be required is missing

---

## Publication of your CIF

You should attempt to resolve as many as possible of the alerts in all categories. Often the minor alerts point to easily fixed oversights, errors and omissions in your CIF or refinement strategy, so attention to these fine details can be worthwhile. In order to resolve some of the more serious problems it may be necessary to carry out additional measurements or structure refinements. However, the nature of your study may justify the reported deviations from journal submission requirements and the more serious of these should be commented upon in the discussion or experimental section of a paper or in the "special\_details" fields of the CIF. *checkCIF* was carefully designed to identify outliers and unusual parameters, but every test has its limitations and alerts that are not important in a particular case may appear. Conversely, the absence of alerts does not guarantee there are no aspects of the results needing attention. It is up to the individual to critically assess their own results and, if necessary, seek expert advice.

If level A alerts remain, which you believe to be justified deviations, and you intend to submit this CIF for publication in a journal, you should additionally insert an explanation in your CIF using the Validation Reply Form (VRF) below. This will allow your explanation to be considered as part of the review process.

## Validation response form

Please find below a validation response form (VRF) that can be filled in and pasted into your CIF.

```
# start Validation Reply Form
_vrf_PUBL004_GLOBAL
;
PROBLEM: The contact author's name and address are missing,
RESPONSE: ...
;
_vrf_PUBL005_GLOBAL
;
PROBLEM: _publ_contact_author_email, _publ_contact_author_fax and
RESPONSE: ...
;
_vrf_PUBL006_GLOBAL
;
PROBLEM: _publ_requested_journal is missing
RESPONSE: ...
;
_vrf_PUBL008_GLOBAL
;
PROBLEM: _publ_section_title is missing. Title of paper.
RESPONSE: ...
;
_vrf_PUBL009_GLOBAL
;
PROBLEM: _publ_author_name is missing. List of author(s) name(s).
RESPONSE: ...
;
_vrf_PUBL010_GLOBAL
;
PROBLEM: _publ_author_address is missing. Author(s) address(es).
RESPONSE: ...
;
_vrf_PUBL012_GLOBAL
;
```

PROBLEM: \_publ\_section\_abstract is missing.  
RESPONSE: ...  
;  
# end Validation Reply Form

If you wish to submit your CIF for publication in Acta Crystallographica Section C or E, you should upload your CIF via the web. If you wish to submit your CIF for publication in IUCrData you should upload your CIF via the web. If your CIF is to form part of a submission to another IUCr journal, you will be asked, either during electronic submission or by the Co-editor handling your paper, to upload your CIF via our web site.

---

**PLATON version of 05/12/2020; check.def file version of 05/12/2020**

Datablock I - ellipsoid plot

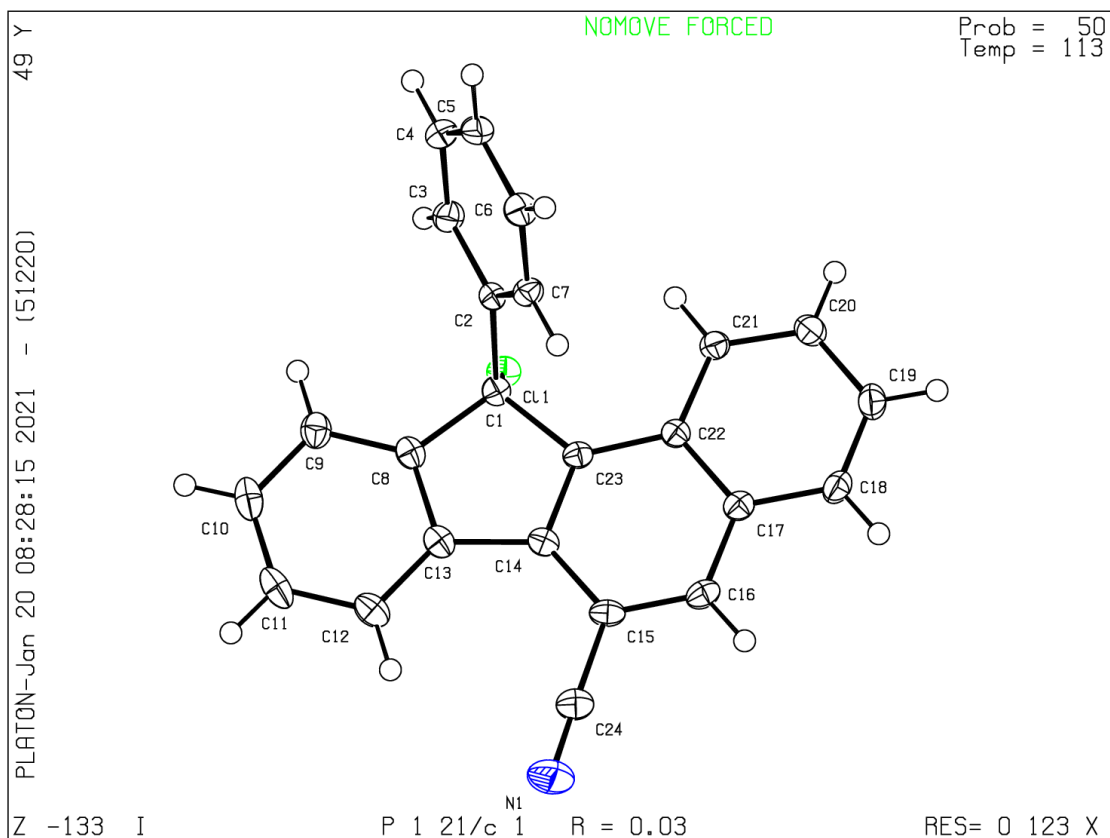

Supplement: d3gc03592a1.pdf [file d3gc03592a1.pdf]
